# Supplementary material
Source: publisher figshare collection journal article supplement (https://acs.figshare.com/ndownloader/files/3862723)
Supplement: Supplementary file 1 [file 3862723]

## Sheet: Table S1
sRNA ID	sRNA seq	sRNA len	sRNA abundance	human mRNA ID	Map strand	human start	end	sRNA start	end	matched nt in aligned region	map pattern	# Mismatches	human gene annot
222606	ATTTCTTTTTCTTTTTTCTTTT	22	2	NM_001142680	+	3276	3297	1	22	22	22	0	anoctamin 6 (ANO6), transcript variant 4, mRNA
222606	ATTTCTTTTTCTTTTTTCTTTT	22	2	NM_001142679	+	3419	3440	1	22	22	22	0	anoctamin 6 (ANO6), transcript variant 3, mRNA
322422	TTGTTTTTGTTTTTTGTTTTT	21	1	NM_001412	+	1769	1789	1	21	21	21	0	eukaryotic translation initiation factor 1A, X-linked (EIF1AX), mRNA
322422	TTGTTTTTGTTTTTTGTTTTT	21	1	NM_005197	+	3162	3182	1	21	21	21	0	forkhead box N3 (FOXN3), transcript variant 2, mRNA
322422	TTGTTTTTGTTTTTTGTTTTT	21	1	NM_001085471	+	3111	3131	1	21	21	21	0	forkhead box N3 (FOXN3), transcript variant 1, mRNA
322422	TTGTTTTTGTTTTTTGTTTTT	21	1	NM_004454	-	2616	2636	1	21	21	21	0	ets variant 5 (ETV5), mRNA
322422	TTGTTTTTGTTTTTTGTTTTT	21	1	NM_001010895	-	3941	3961	1	21	21	21	0	chromosome 9 open reading frame 102 (C9orf102), mRNA
322422	TTGTTTTTGTTTTTTGTTTTT	21	1	NM_001145511	-	3339	3359	1	21	21	21	0	nuclear factor I/A (NFIA), transcript variant 3, mRNA
322422	TTGTTTTTGTTTTTTGTTTTT	21	1	NM_001134673	-	3495	3515	1	21	21	21	0	nuclear factor I/A (NFIA), transcript variant 1, mRNA
322422	TTGTTTTTGTTTTTTGTTTTT	21	1	NM_005595	-	3403	3423	1	21	21	21	0	nuclear factor I/A (NFIA), transcript variant 2, mRNA
322422	TTGTTTTTGTTTTTTGTTTTT	21	1	NM_001145512	-	3228	3248	1	21	21	21	0	nuclear factor I/A (NFIA), transcript variant 4, mRNA
322422	TTGTTTTTGTTTTTTGTTTTT	21	1	NM_004470	-	684	704	1	21	21	21	0	FK506 binding protein 2, 13kDa (FKBP2), transcript variant 1, mRNA
332989	TTTTTCTTTTTTGTTTTTTGTT	22	1	NR_037805	+	1717	1738	1	22	22	22	0	zinc finger protein 321, pseudogene (ZNF321P), non-coding RNA
332989	TTTTTCTTTTTTGTTTTTTGTT	22	1	NM_001202473	+	2063	2084	1	22	22	22	0	ZNF816-ZNF321P readthrough (ZNF816-ZNF321P), mRNA
606702	TTTTCTTTTTTGTTTTTTGTTT	22	1	NR_037805	+	1718	1739	1	22	22	22	0	zinc finger protein 321, pseudogene (ZNF321P), non-coding RNA
606702	TTTTCTTTTTTGTTTTTTGTTT	22	1	NM_001202473	+	2064	2085	1	22	22	22	0	ZNF816-ZNF321P readthrough (ZNF816-ZNF321P), mRNA
619708	TTGGGTTTTGTTTTTGTTTTT	21	1	NM_152309	+	4306	4326	1	21	21	21	0	phosphoinositide-3-kinase adaptor protein 1 (PIK3AP1), mRNA
656526	ATTTCTTTTTCTTTTTTCTTT	21	1	NM_001142680	+	3276	3296	1	21	21	21	0	anoctamin 6 (ANO6), transcript variant 4, mRNA
656526	ATTTCTTTTTCTTTTTTCTTT	21	1	NM_001142679	+	3419	3439	1	21	21	21	0	anoctamin 6 (ANO6), transcript variant 3, mRNA
701732	TTTTTGTTTTTTGTTTGGTTT	21	1	NM_015065	+	7071	7091	1	21	21	21	0	exophilin 5 (EXPH5), mRNA
857767	TGATGAAGATGAGTTTGATGA	21	1	NM_002525	+	841	861	1	21	21	21	0	nardilysin (N-arginine dibasic convertase) (NRD1), transcript variant 1, mRNA
857767	TGATGAAGATGAGTTTGATGA	21	1	NM_001101662	+	841	861	1	21	21	21	0	nardilysin (N-arginine dibasic convertase) (NRD1), transcript variant 2, mRNA
857767	TGATGAAGATGAGTTTGATGA	21	1	NM_001242361	+	236	256	1	21	21	21	0	nardilysin (N-arginine dibasic convertase) (NRD1), transcript variant 3, mRNA
1166373	TGGGTTTTGTTTTTGTTTTTT	21	1	NM_152309	+	4307	4327	1	21	21	21	0	phosphoinositide-3-kinase adaptor protein 1 (PIK3AP1), mRNA
214	ACCAGATTCTGATCTTCCTCA	21	742	NM_001410	-	10253	10273	1	21	20	6T14	1	multiple EGF-like-domains 8 (MEGF8), mRNA
2211	TGAGGAAGATCAGAATCTGGT	21	85	NM_001410	+	10253	10273	1	21	20	14A6	1	multiple EGF-like-domains 8 (MEGF8), mRNA
7527	TTCTTCCCCTCTTAGATAACT	21	28	NM_001039937	+	1288	1308	1	21	20	17A3	1	integrator complex subunit 6 (INTS6), transcript variant 2, mRNA
7527	TTCTTCCCCTCTTAGATAACT	21	28	NM_012141	+	1780	1800	1	21	20	17A3	1	integrator complex subunit 6 (INTS6), transcript variant 1, mRNA
14297	CAAAGATAATGTAGAAAGTGCT	22	15	NM_004063	+	2570	2591	1	22	21	12A9	1	cadherin 17, LI cadherin (liver-intestine) (CDH17), transcript variant 1, mRNA
14297	CAAAGATAATGTAGAAAGTGCT	22	15	NM_001144663	+	2571	2592	1	22	21	12A9	1	cadherin 17, LI cadherin (liver-intestine) (CDH17), transcript variant 2, mRNA
15005	AAGTGAGGTTTGATTAAGAAT	21	15	NM_021224	-	7823	7843	1	21	20	4G16	1	zinc finger protein 462 (ZNF462), mRNA
17801	TTTTACAAAAGCCTGAGAGTT	21	13	NM_052872	+	190	210	1	21	20	4A16	1	interleukin 17F (IL17F), mRNA
34462	ATTTCTCTCATCTTGTCTGAG	21	7	NM_015272	-	6105	6124	2	21	20	20	1	RPGRIP1-like (RPGRIP1L), transcript variant 1, mRNA
34462	ATTTCTCTCATCTTGTCTGAG	21	7	NM_001127897	-	5865	5884	2	21	20	20	1	RPGRIP1-like (RPGRIP1L), transcript variant 2, mRNA
38015	TCTCAGAATCATCATCATCCT	21	6	NM_004183	-	1479	1499	1	21	20	5G15	1	bestrophin 1 (BEST1), transcript variant 1, mRNA
38015	TCTCAGAATCATCATCATCCT	21	6	NM_001139443	-	1291	1311	1	21	20	5G15	1	bestrophin 1 (BEST1), transcript variant 2, mRNA
40623	AGTGTATGTCCCATCTGGATT	21	6	NR_037142	-	264	284	1	21	20	2T18	1	cytoskeleton associated protein 2-like pseudogene (LOC100289473), non-coding RNA
47323	ATACCATCATTGTGCAAATCTG	22	5	NM_001151	+	3643	3664	1	22	21	18T3	1	solute carrier family 25 (mitochondrial carrier; adenine nucleotide translocator), member 4 (SLC25A4), nuclear gene encoding mitochondrial protein, mRNA
48103	TATCTGTCTTCTGTTTATCACT	22	5	NM_024607	+	4139	4160	1	22	21	17T4	1	protein phosphatase 1, regulatory subunit 3B (PPP1R3B), transcript variant 2, mRNA
48103	TATCTGTCTTCTGTTTATCACT	22	5	NM_001201329	+	4287	4308	1	22	21	17T4	1	protein phosphatase 1, regulatory subunit 3B (PPP1R3B), transcript variant 1, mRNA
68437	AAAGATAATGTAGAAAGTGCT	21	4	NM_004063	+	2571	2591	1	21	20	11A9	1	cadherin 17, LI cadherin (liver-intestine) (CDH17), transcript variant 1, mRNA
68437	AAAGATAATGTAGAAAGTGCT	21	4	NM_001144663	+	2572	2592	1	21	20	11A9	1	cadherin 17, LI cadherin (liver-intestine) (CDH17), transcript variant 2, mRNA
69811	CTTCTTCATCAAACTCATCTT	21	4	NM_006401	-	909	929	1	21	20	16A4	1	acidic (leucine-rich) nuclear phosphoprotein 32 family, member B (ANP32B), mRNA
69811	CTTCTTCATCAAACTCATCTT	21	4	NM_152401	-	276	296	1	21	20	13C7	1	phosducin-like 2 (PDCL2), mRNA
73134	TACCATCATTGTGCAAATCTG	21	4	NM_001151	+	3644	3664	1	21	20	17T3	1	solute carrier family 25 (mitochondrial carrier; adenine nucleotide translocator), member 4 (SLC25A4), nuclear gene encoding mitochondrial protein, mRNA
105536	ACAAAACTATCAGAACTGTGA	21	3	NM_019894	+	2855	2875	1	21	20	7T13	1	transmembrane protease, serine 4 (TMPRSS4), transcript variant 1, mRNA
105536	ACAAAACTATCAGAACTGTGA	21	3	NM_001083947	+	2840	2860	1	21	20	7T13	1	transmembrane protease, serine 4 (TMPRSS4), transcript variant 3, mRNA
105536	ACAAAACTATCAGAACTGTGA	21	3	NM_001173551	+	2849	2869	1	21	20	7T13	1	transmembrane protease, serine 4 (TMPRSS4), transcript variant 4, mRNA
105536	ACAAAACTATCAGAACTGTGA	21	3	NM_001173552	+	2735	2755	1	21	20	7T13	1	transmembrane protease, serine 4 (TMPRSS4), transcript variant 5, mRNA
106397	CCATCCTGCTGAGCTTTGTCA	21	3	NM_172239	+	1703	1723	1	21	20	17G3	1	REX1, RNA exonuclease 1 homolog (S. cerevisiae)-like 1 (REXO1L1), mRNA
106397	CCATCCTGCTGAGCTTTGTCA	21	3	NR_003594	+	719	739	1	21	20	17G3	1	REX1, RNA exonuclease 1 homolog (S. cerevisiae)-like 2 (pseudogene) (REXO1L2P), non-coding RNA
109488	TTTCCATTTCGTTAGCTTTCT	21	3	NM_018279	+	660	680	1	21	20	3C17	1	transmembrane protein 19 (TMEM19), mRNA
111987	TTTTTGATTTTTGTTTGATTTT	22	3	NM_022900	+	3623	3644	1	22	21	6A15	1	CAS1 domain containing 1 (CASD1), mRNA
140021	CCTTCTTCCTCTTCTTCAACT	21	2	NM_015934	-	1551	1570	2	21	20	20	1	NOP58 ribonucleoprotein homolog (yeast) (NOP58), mRNA
140021	CCTTCTTCCTCTTCTTCAACT	21	2	NR_036466	+	154	174	1	21	20	18A2	1	uncharacterized LOC100499405 (LOC100499405), non-coding RNA
160151	TTATCTGAACTGGTCTATTCC	21	2	NR_027282	+	2003	2023	1	21	20	5T15	1	chromosome 10 open reading frame 88 pseudogene (LOC399815), non-coding RNA
165939	CTCAGAATCATCATCATCCTCT	22	2	NM_004183	-	1477	1498	1	22	21	4G17	1	bestrophin 1 (BEST1), transcript variant 1, mRNA
165939	CTCAGAATCATCATCATCCTCT	22	2	NM_001139443	-	1289	1310	1	22	21	4G17	1	bestrophin 1 (BEST1), transcript variant 2, mRNA
171426	AGATGAGTTTGATGAAGAAGA	21	2	NM_006401	+	910	930	1	21	20	3T17	1	acidic (leucine-rich) nuclear phosphoprotein 32 family, member B (ANP32B), mRNA
171426	AGATGAGTTTGATGAAGAAGA	21	2	NM_152401	+	277	297	1	21	20	6G14	1	phosducin-like 2 (PDCL2), mRNA
184555	TTTTTTGTTGTTTTTGTTATT	21	2	NM_015084	+	1647	1667	1	21	20	18A2	1	mitochondrial ribosomal protein S27 (MRPS27), nuclear gene encoding mitochondrial protein, mRNA
184555	TTTTTTGTTGTTTTTGTTATT	21	2	NM_001030001	-	706	726	1	21	20	18A2	1	ribosomal protein S29 (RPS29), transcript variant 2, mRNA
184555	TTTTTTGTTGTTTTTGTTATT	21	2	NM_005610	+	5346	5366	1	21	20	18A2	1	retinoblastoma binding protein 4 (RBBP4), transcript variant 1, mRNA
184555	TTTTTTGTTGTTTTTGTTATT	21	2	NM_001135255	+	5343	5363	1	21	20	18A2	1	retinoblastoma binding protein 4 (RBBP4), transcript variant 2, mRNA
184555	TTTTTTGTTGTTTTTGTTATT	21	2	NM_001135256	+	5246	5266	1	21	20	18A2	1	retinoblastoma binding protein 4 (RBBP4), transcript variant 3, mRNA
184555	TTTTTTGTTGTTTTTGTTATT	21	2	NM_033326	+	2681	2701	1	21	20	12T8	1	SRY (sex determining region Y)-box 6 (SOX6), transcript variant 2, mRNA
184555	TTTTTTGTTGTTTTTGTTATT	21	2	NM_017508	+	2795	2815	1	21	20	12T8	1	SRY (sex determining region Y)-box 6 (SOX6), transcript variant 1, mRNA
184555	TTTTTTGTTGTTTTTGTTATT	21	2	NM_001145811	+	2773	2793	1	21	20	12T8	1	SRY (sex determining region Y)-box 6 (SOX6), transcript variant 3, mRNA
184555	TTTTTTGTTGTTTTTGTTATT	21	2	NM_001145819	+	2735	2755	1	21	20	12T8	1	SRY (sex determining region Y)-box 6 (SOX6), transcript variant 4, mRNA
193626	CTTCTTCCTCTTCTTCAACTG	21	2	NM_015934	-	1551	1570	1	20	20	20	1	NOP58 ribonucleoprotein homolog (yeast) (NOP58), mRNA
193626	CTTCTTCCTCTTCTTCAACTG	21	2	NM_001008779	-	413	433	1	21	20	7C13	1	speedy homolog A (Xenopus laevis) (SPDYA), transcript variant 2, mRNA
193626	CTTCTTCCTCTTCTTCAACTG	21	2	NM_001142634	-	527	547	1	21	20	7C13	1	speedy homolog A (Xenopus laevis) (SPDYA), transcript variant 3, mRNA
193626	CTTCTTCCTCTTCTTCAACTG	21	2	NM_182756	-	601	621	1	21	20	7C13	1	speedy homolog A (Xenopus laevis) (SPDYA), transcript variant 1, mRNA
214583	TTTTCATCAAGATAGCTATCA	21	2	NM_000780	-	1290	1310	1	21	20	14G6	1	cytochrome P450, family 7, subfamily A, polypeptide 1 (CYP7A1), mRNA
217078	TTTTTTGTTTGTTTTTCTTTTT	22	2	NM_001136562	+	6593	6614	1	22	21	6G15	1	A kinase (PRKA) anchor protein 2 (AKAP2), transcript variant 2, mRNA
217078	TTTTTTGTTTGTTTTTCTTTTT	22	2	NM_001004065	+	6755	6776	1	22	21	6G15	1	A kinase (PRKA) anchor protein 2 (AKAP2), transcript variant 1, mRNA
217078	TTTTTTGTTTGTTTTTCTTTTT	22	2	NM_007203	+	7310	7331	1	22	21	6G15	1	PALM2-AKAP2 readthrough (PALM2-AKAP2), transcript variant 1, mRNA
217078	TTTTTTGTTTGTTTTTCTTTTT	22	2	NM_147150	+	7271	7292	1	22	21	6G15	1	PALM2-AKAP2 readthrough (PALM2-AKAP2), transcript variant 2, mRNA
217078	TTTTTTGTTTGTTTTTCTTTTT	22	2	NR_038848	+	61	82	1	22	21	15T6	1	uncharacterized LOC643401 (LOC643401), non-coding RNA
217078	TTTTTTGTTTGTTTTTCTTTTT	22	2	NR_036501	+	1299	1320	1	22	21	10G11	1	uncharacterized LOC401321 (LOC401321), non-coding RNA
217078	TTTTTTGTTTGTTTTTCTTTTT	22	2	NM_004796	-	4186	4207	1	22	21	16C5	1	neurexin 3 (NRXN3), transcript variant 1, mRNA
217078	TTTTTTGTTTGTTTTTCTTTTT	22	2	NM_138970	-	2789	2810	1	22	21	16C5	1	neurexin 3 (NRXN3), transcript variant 2, mRNA
217078	TTTTTTGTTTGTTTTTCTTTTT	22	2	NM_001105250	-	2870	2891	1	22	21	16C5	1	neurexin 3 (NRXN3), transcript variant 3, mRNA
222606	ATTTCTTTTTCTTTTTTCTTTT	22	2	NM_001193552	+	5490	5510	2	22	21	21	1	zinc finger protein 850 (ZNF850), mRNA
222606	ATTTCTTTTTCTTTTTTCTTTT	22	2	NM_001130083	+	2932	2952	2	22	21	21	1	actin binding LIM protein family, member 2 (ABLIM2), transcript variant 1, mRNA
222606	ATTTCTTTTTCTTTTTTCTTTT	22	2	NM_001130084	+	2830	2850	2	22	21	21	1	actin binding LIM protein family, member 2 (ABLIM2), transcript variant 2, mRNA
222606	ATTTCTTTTTCTTTTTTCTTTT	22	2	NM_001130085	+	2713	2733	2	22	21	21	1	actin binding LIM protein family, member 2 (ABLIM2), transcript variant 3, mRNA
222606	ATTTCTTTTTCTTTTTTCTTTT	22	2	NM_001130086	+	2674	2694	2	22	21	21	1	actin binding LIM protein family, member 2 (ABLIM2), transcript variant 4, mRNA
222606	ATTTCTTTTTCTTTTTTCTTTT	22	2	NM_001130087	+	2590	2610	2	22	21	21	1	actin binding LIM protein family, member 2 (ABLIM2), transcript variant 5, mRNA
222606	ATTTCTTTTTCTTTTTTCTTTT	22	2	NM_032432	+	2560	2580	2	22	21	21	1	actin binding LIM protein family, member 2 (ABLIM2), transcript variant 6, mRNA
222606	ATTTCTTTTTCTTTTTTCTTTT	22	2	NM_017708	-	1957	1977	2	22	21	21	1	family with sequence similarity 83, member E (FAM83E), mRNA
233695	TGAAGATGAGTTTGATGAAGAA	22	2	NM_002525	+	844	865	1	22	21	18A3	1	nardilysin (N-arginine dibasic convertase) (NRD1), transcript variant 1, mRNA
233695	TGAAGATGAGTTTGATGAAGAA	22	2	NM_001101662	+	844	865	1	22	21	18A3	1	nardilysin (N-arginine dibasic convertase) (NRD1), transcript variant 2, mRNA
233695	TGAAGATGAGTTTGATGAAGAA	22	2	NM_001242361	+	239	260	1	22	21	18A3	1	nardilysin (N-arginine dibasic convertase) (NRD1), transcript variant 3, mRNA
233695	TGAAGATGAGTTTGATGAAGAA	22	2	NM_152401	+	274	295	1	22	21	9G12	1	phosducin-like 2 (PDCL2), mRNA
249008	AACCAGATTCTGATCTTCCTCA	22	2	NM_001410	-	10253	10274	1	22	21	7T14	1	multiple EGF-like-domains 8 (MEGF8), mRNA
253391	GGAAAACATTGTTGCTTTGTT	21	2	NM_004447	-	3237	3257	1	21	20	3A17	1	epidermal growth factor receptor pathway substrate 8 (EPS8), mRNA
260888	TTGATGAAGATGAGTTTGATG	21	1	NM_002525	+	841	860	2	21	20	20	1	nardilysin (N-arginine dibasic convertase) (NRD1), transcript variant 1, mRNA
260888	TTGATGAAGATGAGTTTGATG	21	1	NM_001101662	+	841	860	2	21	20	20	1	nardilysin (N-arginine dibasic convertase) (NRD1), transcript variant 2, mRNA
260888	TTGATGAAGATGAGTTTGATG	21	1	NM_001242361	+	236	255	2	21	20	20	1	nardilysin (N-arginine dibasic convertase) (NRD1), transcript variant 3, mRNA
289333	AAACAAAACCCAAATTTGGCC	21	1	NM_139166	+	1209	1229	1	21	20	8C12	1	actin-binding Rho activating protein (ABRA), mRNA
302931	TTTTGAAAAATCTTTATAGCT	21	1	NM_004402	-	3003	3023	1	21	20	17A3	1	DNA fragmentation factor, 40kDa, beta polypeptide (caspase-activated DNase) (DFFB), mRNA
316686	TGAATCAGAATACAACTGGGT	21	1	NM_198459	+	663	683	1	21	20	11A9	1	DENN/MADD domain containing 2C (DENND2C), transcript variant 2, mRNA
316686	TGAATCAGAATACAACTGGGT	21	1	NM_001256404	+	1032	1052	1	21	20	11A9	1	DENN/MADD domain containing 2C (DENND2C), transcript variant 1, mRNA
332989	TTTTTCTTTTTTGTTTTTTGTT	22	1	NM_052874	+	1905	1926	1	22	21	5C16	1	syntaxin 1B (STX1B), mRNA
332989	TTTTTCTTTTTTGTTTTTTGTT	22	1	NM_145296	-	2067	2088	1	22	21	5C16	1	cell adhesion molecule 4 (CADM4), mRNA
332989	TTTTTCTTTTTTGTTTTTTGTT	22	1	NM_001242409	+	5273	5294	1	22	21	5C16	1	family with sequence similarity 59, member A (FAM59A), transcript variant 1, mRNA
332989	TTTTTCTTTTTTGTTTTTTGTT	22	1	NM_022751	+	5270	5291	1	22	21	5C16	1	family with sequence similarity 59, member A (FAM59A), transcript variant 2, mRNA
332989	TTTTTCTTTTTTGTTTTTTGTT	22	1	NM_018945	+	158	179	1	22	21	12G9	1	phosphodiesterase 7B (PDE7B), mRNA
332989	TTTTTCTTTTTTGTTTTTTGTT	22	1	NM_001146267	-	62	83	1	22	21	5C16	1	G protein-coupled receptor 85 (GPR85), transcript variant 4, mRNA
332989	TTTTTCTTTTTTGTTTTTTGTT	22	1	NM_005596	-	3304	3325	1	22	21	5C16	1	nuclear factor I/B (NFIB), transcript variant 3, mRNA
333325	CAGCTCTGGGTGAATCACAAA	21	1	NM_001199295	-	3386	3406	1	21	20	3C17	1	zinc finger protein 549 (ZNF549), transcript variant 1, mRNA
333325	CAGCTCTGGGTGAATCACAAA	21	1	NM_153263	-	3347	3367	1	21	20	3C17	1	zinc finger protein 549 (ZNF549), transcript variant 2, mRNA
350011	TATGTTTATTTTCTTTCTTTA	21	1	NM_016529	-	4548	4568	1	21	20	7A13	1	ATPase, aminophospholipid transporter, class I, type 8A, member 2 (ATP8A2), mRNA
387955	TTTTGTGATTCACCCAGAGCTG	22	1	NM_001199295	+	3385	3406	1	22	21	18G3	1	zinc finger protein 549 (ZNF549), transcript variant 1, mRNA
387955	TTTTGTGATTCACCCAGAGCTG	22	1	NM_153263	+	3346	3367	1	22	21	18G3	1	zinc finger protein 549 (ZNF549), transcript variant 2, mRNA
393527	TTTCTCTCATCTTGTCTGAGG	21	1	NM_015272	-	6105	6124	1	20	20	20	1	RPGRIP1-like (RPGRIP1L), transcript variant 1, mRNA
393527	TTTCTCTCATCTTGTCTGAGG	21	1	NM_001127897	-	5865	5884	1	20	20	20	1	RPGRIP1-like (RPGRIP1L), transcript variant 2, mRNA
421827	AACAAAAACAAAATAAGGCTG	21	1	NM_016323	-	3246	3266	1	21	20	5A15	1	hect domain and RLD 5 (HERC5), mRNA
497218	TTAGAATCTGATATAAAACAT	21	1	NM_001160046	+	3168	3188	1	21	20	12A8	1	shugoshin-like 2 (S. pombe) (SGOL2), transcript variant 3, mRNA
497218	TTAGAATCTGATATAAAACAT	21	1	NM_152524	+	3168	3188	1	21	20	12A8	1	shugoshin-like 2 (S. pombe) (SGOL2), transcript variant 1, mRNA
497218	TTAGAATCTGATATAAAACAT	21	1	NM_001160033	+	3168	3188	1	21	20	12A8	1	shugoshin-like 2 (S. pombe) (SGOL2), transcript variant 2, mRNA
553942	TTTTGTTGTTTTTTGTTTATT	21	1	NM_001113738	+	3584	3604	1	21	20	14G6	1	ADP-ribosylation factor-like 17A (ARL17A), transcript variant 1, mRNA
553942	TTTTGTTGTTTTTTGTTTATT	21	1	NM_001040284	+	4260	4280	1	21	20	18A2	1	PAP associated domain containing 5 (PAPD5), transcript variant 1, mRNA
553942	TTTTGTTGTTTTTTGTTTATT	21	1	NM_001040285	+	4119	4139	1	21	20	18A2	1	PAP associated domain containing 5 (PAPD5), transcript variant 2, mRNA
553942	TTTTGTTGTTTTTTGTTTATT	21	1	NM_006885	-	15753	15773	1	21	20	18A2	1	zinc finger homeobox 3 (ZFHX3), transcript variant A, mRNA
553942	TTTTGTTGTTTTTTGTTTATT	21	1	NM_001164766	-	12467	12487	1	21	20	18A2	1	zinc finger homeobox 3 (ZFHX3), transcript variant B, mRNA
553942	TTTTGTTGTTTTTTGTTTATT	21	1	NM_015048	+	7428	7448	1	21	20	14G6	1	SET domain containing 1B (SETD1B), mRNA
553942	TTTTGTTGTTTTTTGTTTATT	21	1	NM_006114	-	1664	1684	1	21	20	18A2	1	translocase of outer mitochondrial membrane 40 homolog (yeast) (TOMM40), nuclear gene encoding mitochondrial protein, transcript variant 3, mRNA
553942	TTTTGTTGTTTTTTGTTTATT	21	1	NM_001128916	-	1667	1687	1	21	20	18A2	1	translocase of outer mitochondrial membrane 40 homolog (yeast) (TOMM40), nuclear gene encoding mitochondrial protein, transcript variant 2, mRNA
553942	TTTTGTTGTTTTTTGTTTATT	21	1	NM_001128917	-	1759	1779	1	21	20	18A2	1	translocase of outer mitochondrial membrane 40 homolog (yeast) (TOMM40), nuclear gene encoding mitochondrial protein, transcript variant 1, mRNA
553942	TTTTGTTGTTTTTTGTTTATT	21	1	NM_001039395	+	1707	1727	1	21	20	10T10	1	chromosome 9 open reading frame 68 (C9orf68), mRNA
559397	ATTCTTAATCAAACCTCACTT	21	1	NM_021224	+	7823	7843	1	21	20	16C4	1	zinc finger protein 462 (ZNF462), mRNA
559690	AAGTTTGATTTAGTTATTTTG	21	1	NM_001040450	+	3597	3617	1	21	20	7A13	1	family with sequence similarity 63, member B (FAM63B), transcript variant 1, mRNA
559690	AAGTTTGATTTAGTTATTTTG	21	1	NM_001040453	+	3594	3614	1	21	20	7A13	1	family with sequence similarity 63, member B (FAM63B), transcript variant 2, mRNA
562401	TTTTTGTTTGGTTTTTGATTT	21	1	NM_016357	-	2598	2618	1	21	20	9G11	1	LIM domain and actin binding 1 (LIMA1), transcript variant 2, mRNA
562401	TTTTTGTTTGGTTTTTGATTT	21	1	NM_001113546	-	2601	2621	1	21	20	9G11	1	LIM domain and actin binding 1 (LIMA1), transcript variant 1, mRNA
562401	TTTTTGTTTGGTTTTTGATTT	21	1	NM_001113547	-	2482	2502	1	21	20	9G11	1	LIM domain and actin binding 1 (LIMA1), transcript variant 3, mRNA
562401	TTTTTGTTTGGTTTTTGATTT	21	1	NM_001243775	-	2209	2229	1	21	20	9G11	1	LIM domain and actin binding 1 (LIMA1), transcript variant 4, mRNA
580206	AATTTGGGTTTTGTTTTTGTT	21	1	NR_027473	+	6859	6879	1	21	20	5G15	1	lysine (K)-specific demethylase 2A (KDM2A), transcript variant 2, non-coding RNA
580206	AATTTGGGTTTTGTTTTTGTT	21	1	NM_012308	+	7311	7331	1	21	20	5G15	1	lysine (K)-specific demethylase 2A (KDM2A), transcript variant 1, mRNA
580206	AATTTGGGTTTTGTTTTTGTT	21	1	NM_001256405	+	5303	5323	1	21	20	5G15	1	lysine (K)-specific demethylase 2A (KDM2A), transcript variant 3, mRNA
606702	TTTTCTTTTTTGTTTTTTGTTT	22	1	NM_052874	+	1906	1927	1	22	21	4C17	1	syntaxin 1B (STX1B), mRNA
606702	TTTTCTTTTTTGTTTTTTGTTT	22	1	NM_001242409	+	5274	5295	1	22	21	4C17	1	family with sequence similarity 59, member A (FAM59A), transcript variant 1, mRNA
606702	TTTTCTTTTTTGTTTTTTGTTT	22	1	NM_022751	+	5271	5292	1	22	21	4C17	1	family with sequence similarity 59, member A (FAM59A), transcript variant 2, mRNA
606702	TTTTCTTTTTTGTTTTTTGTTT	22	1	NM_017758	+	1970	1991	1	22	21	4C17	1	alkB, alkylation repair homolog 5 (E. coli) (ALKBH5), mRNA
606702	TTTTCTTTTTTGTTTTTTGTTT	22	1	NM_014563	+	1484	1505	1	22	21	4C17	1	trafficking protein particle complex 2 (TRAPPC2), transcript variant 2, mRNA
606702	TTTTCTTTTTTGTTTTTTGTTT	22	1	NM_001011658	+	1626	1647	1	22	21	4C17	1	trafficking protein particle complex 2 (TRAPPC2), transcript variant 1, mRNA
606702	TTTTCTTTTTTGTTTTTTGTTT	22	1	NM_001128835	+	1620	1641	1	22	21	4C17	1	trafficking protein particle complex 2 (TRAPPC2), transcript variant 3, mRNA
606702	TTTTCTTTTTTGTTTTTTGTTT	22	1	NM_018013	+	5112	5133	1	22	21	4C17	1	sine oculis binding protein homolog (Drosophila) (SOBP), mRNA
610076	ATGAGCAGTATTTCTTTGAAA	21	1	NM_015662	+	1244	1264	1	21	20	5C15	1	intraflagellar transport 172 homolog (Chlamydomonas) (IFT172), mRNA
614609	ATCTGTCTTCTGTTTATCACT	21	1	NM_024607	+	4140	4160	1	21	20	16T4	1	protein phosphatase 1, regulatory subunit 3B (PPP1R3B), transcript variant 2, mRNA
614609	ATCTGTCTTCTGTTTATCACT	21	1	NM_001201329	+	4288	4308	1	21	20	16T4	1	protein phosphatase 1, regulatory subunit 3B (PPP1R3B), transcript variant 1, mRNA
656526	ATTTCTTTTTCTTTTTTCTTT	21	1	NM_001193552	+	5490	5509	2	21	20	20	1	zinc finger protein 850 (ZNF850), mRNA
656526	ATTTCTTTTTCTTTTTTCTTT	21	1	NM_001130083	+	2932	2951	2	21	20	20	1	actin binding LIM protein family, member 2 (ABLIM2), transcript variant 1, mRNA
656526	ATTTCTTTTTCTTTTTTCTTT	21	1	NM_001130084	+	2830	2849	2	21	20	20	1	actin binding LIM protein family, member 2 (ABLIM2), transcript variant 2, mRNA
656526	ATTTCTTTTTCTTTTTTCTTT	21	1	NM_001130085	+	2713	2732	2	21	20	20	1	actin binding LIM protein family, member 2 (ABLIM2), transcript variant 3, mRNA
656526	ATTTCTTTTTCTTTTTTCTTT	21	1	NM_001130086	+	2674	2693	2	21	20	20	1	actin binding LIM protein family, member 2 (ABLIM2), transcript variant 4, mRNA
656526	ATTTCTTTTTCTTTTTTCTTT	21	1	NM_001130087	+	2590	2609	2	21	20	20	1	actin binding LIM protein family, member 2 (ABLIM2), transcript variant 5, mRNA
656526	ATTTCTTTTTCTTTTTTCTTT	21	1	NM_032432	+	2560	2579	2	21	20	20	1	actin binding LIM protein family, member 2 (ABLIM2), transcript variant 6, mRNA
656526	ATTTCTTTTTCTTTTTTCTTT	21	1	NM_017708	-	1958	1977	2	21	20	20	1	family with sequence similarity 83, member E (FAM83E), mRNA
660039	TTGTAACTCCTGAACAAATGG	21	1	NM_177422	-	1264	1284	1	21	20	3T17	1	eukaryotic translation initiation factor 2C, 3 (EIF2C3), transcript variant 2, mRNA
660039	TTGTAACTCCTGAACAAATGG	21	1	NM_024852	-	1522	1542	1	21	20	3T17	1	eukaryotic translation initiation factor 2C, 3 (EIF2C3), transcript variant 1, mRNA
679712	CTTCTTCCCCTCTTAGATAACT	22	1	NM_001039937	+	1287	1308	1	22	21	18A3	1	integrator complex subunit 6 (INTS6), transcript variant 2, mRNA
679712	CTTCTTCCCCTCTTAGATAACT	22	1	NM_012141	+	1779	1800	1	22	21	18A3	1	integrator complex subunit 6 (INTS6), transcript variant 1, mRNA
701732	TTTTTGTTTTTTGTTTGGTTT	21	1	NM_014060	-	8945	8964	1	20	20	20	1	malignant T cell amplified sequence 1 (MCTS1), transcript variant 1, mRNA
701732	TTTTTGTTTTTTGTTTGGTTT	21	1	NM_001137554	-	8757	8776	1	20	20	20	1	malignant T cell amplified sequence 1 (MCTS1), transcript variant 2, mRNA
701732	TTTTTGTTTTTTGTTTGGTTT	21	1	NR_034022	-	20339	20359	1	21	20	16G4	1	zinc finger protein 655 pseudogene (LOC100131257), non-coding RNA
701732	TTTTTGTTTTTTGTTTGGTTT	21	1	NM_018362	+	3263	3283	1	21	20	12G8	1	lin-7 homolog C (C. elegans) (LIN7C), mRNA
701732	TTTTTGTTTTTTGTTTGGTTT	21	1	NM_080656	+	795	815	1	21	20	16G4	1	CDKN2A interacting protein N-terminal like (CDKN2AIPNL), mRNA
701732	TTTTTGTTTTTTGTTTGGTTT	21	1	NM_032089	+	2458	2478	1	21	20	16G4	1	protocadherin gamma subfamily A, 9 (PCDHGA9), transcript variant 2, mRNA
701732	TTTTTGTTTTTTGTTTGGTTT	21	1	NM_005935	+	7676	7696	1	21	20	16G4	1	AF4/FMR2 family, member 1 (AFF1), transcript variant 2, mRNA
701732	TTTTTGTTTTTTGTTTGGTTT	21	1	NM_001166693	+	7568	7588	1	21	20	16G4	1	AF4/FMR2 family, member 1 (AFF1), transcript variant 1, mRNA
714256	CCATTTGTTCAGGAGTTACAA	21	1	NM_177422	+	1264	1284	1	21	20	17A3	1	eukaryotic translation initiation factor 2C, 3 (EIF2C3), transcript variant 2, mRNA
714256	CCATTTGTTCAGGAGTTACAA	21	1	NM_024852	+	1522	1542	1	21	20	17A3	1	eukaryotic translation initiation factor 2C, 3 (EIF2C3), transcript variant 1, mRNA
723427	TCTCAGAATCATCATCATCCTC	22	1	NM_004183	-	1478	1499	1	22	21	5G16	1	bestrophin 1 (BEST1), transcript variant 1, mRNA
723427	TCTCAGAATCATCATCATCCTC	22	1	NM_001139443	-	1290	1311	1	22	21	5G16	1	bestrophin 1 (BEST1), transcript variant 2, mRNA
784412	TGTTAATCTTTTTCATTTTGTC	22	1	NM_014735	+	4820	4841	1	22	21	7C14	1	PHD finger protein 16 (PHF16), transcript variant 1, mRNA
784412	TGTTAATCTTTTTCATTTTGTC	22	1	NM_001077445	+	4573	4594	1	22	21	7C14	1	PHD finger protein 16 (PHF16), transcript variant 2, mRNA
784584	TGATATTTTTGGAGAGCTGAT	21	1	NM_003893	-	1207	1227	1	21	20	4A16	1	LIM domain binding 1 (LDB1), transcript variant 3, mRNA
784584	TGATATTTTTGGAGAGCTGAT	21	1	NM_001113407	-	1014	1034	1	21	20	4A16	1	LIM domain binding 1 (LDB1), transcript variant 1, mRNA
842303	CTGTTTTCAGAGATTGTTGAC	21	1	NM_021930	+	1530	1550	1	21	20	14T6	1	RAD50 interactor 1 (RINT1), mRNA
848905	CTTCTTCATCAAACTCATCTTC	22	1	NM_006401	-	908	929	1	22	21	16A5	1	acidic (leucine-rich) nuclear phosphoprotein 32 family, member B (ANP32B), mRNA
848905	CTTCTTCATCAAACTCATCTTC	22	1	NM_152401	-	275	296	1	22	21	13C8	1	phosducin-like 2 (PDCL2), mRNA
887723	CATTTCAAATGCTTTGCTTTT	21	1	NM_003457	-	238	258	1	21	20	5C15	1	zinc finger protein 207 (ZNF207), transcript variant 1, mRNA
887723	CATTTCAAATGCTTTGCTTTT	21	1	NM_001098507	-	238	258	1	21	20	5C15	1	zinc finger protein 207 (ZNF207), transcript variant 3, mRNA
887723	CATTTCAAATGCTTTGCTTTT	21	1	NM_001032293	-	238	258	1	21	20	5C15	1	zinc finger protein 207 (ZNF207), transcript variant 2, mRNA
937510	TTCTTCATCAAACTCATCTTC	21	1	NM_002525	-	845	865	1	21	20	3T17	1	nardilysin (N-arginine dibasic convertase) (NRD1), transcript variant 1, mRNA
937510	TTCTTCATCAAACTCATCTTC	21	1	NM_001101662	-	845	865	1	21	20	3T17	1	nardilysin (N-arginine dibasic convertase) (NRD1), transcript variant 2, mRNA
937510	TTCTTCATCAAACTCATCTTC	21	1	NM_001242361	-	240	260	1	21	20	3T17	1	nardilysin (N-arginine dibasic convertase) (NRD1), transcript variant 3, mRNA
937510	TTCTTCATCAAACTCATCTTC	21	1	NM_006401	-	908	928	1	21	20	15A5	1	acidic (leucine-rich) nuclear phosphoprotein 32 family, member B (ANP32B), mRNA
937510	TTCTTCATCAAACTCATCTTC	21	1	NM_152401	-	275	295	1	21	20	12C8	1	phosducin-like 2 (PDCL2), mRNA
1001753	GAAGATGAGTTTGATGAAGAAG	22	1	NM_006401	+	908	929	1	22	21	5T16	1	acidic (leucine-rich) nuclear phosphoprotein 32 family, member B (ANP32B), mRNA
1001753	GAAGATGAGTTTGATGAAGAAG	22	1	NM_152401	+	275	296	1	22	21	8G13	1	phosducin-like 2 (PDCL2), mRNA
1003455	CATATTGTTCATTTAAAACATG	22	1	NR_034131	+	171	192	1	22	21	3A18	1	long intergenic non-protein coding RNA 272 (LINC00272), non-coding RNA
1008120	TTTTGTTGTTTTTGTTATTTT	21	1	NM_001080407	-	2742	2762	1	21	20	10T10	1	galactosidase, beta 1-like 3 (GLB1L3), mRNA
1008120	TTTTGTTGTTTTTGTTATTTT	21	1	NM_178153	+	1308	1328	1	21	20	10T10	1	doublecortin (DCX), transcript variant 3, mRNA
1008120	TTTTGTTGTTTTTGTTATTTT	21	1	NM_000555	+	1606	1626	1	21	20	10T10	1	doublecortin (DCX), transcript variant 1, mRNA
1008120	TTTTGTTGTTTTTGTTATTTT	21	1	NM_001195553	+	1326	1346	1	21	20	10T10	1	doublecortin (DCX), transcript variant 5, mRNA
1008120	TTTTGTTGTTTTTGTTATTTT	21	1	NM_178151	+	1435	1455	1	21	20	10T10	1	doublecortin (DCX), transcript variant 4, mRNA
1008120	TTTTGTTGTTTTTGTTATTTT	21	1	NM_178152	+	1323	1343	1	21	20	10T10	1	doublecortin (DCX), transcript variant 2, mRNA
1010723	CTCAGCTCTTCCTCATCCACA	21	1	NM_015242	-	3420	3440	1	21	20	2C18	1	ArfGAP with RhoGAP domain, ankyrin repeat and PH domain 1 (ARAP1), transcript variant 1, mRNA
1010723	CTCAGCTCTTCCTCATCCACA	21	1	NM_001040118	-	3609	3629	1	21	20	2C18	1	ArfGAP with RhoGAP domain, ankyrin repeat and PH domain 1 (ARAP1), transcript variant 3, mRNA
1010723	CTCAGCTCTTCCTCATCCACA	21	1	NM_001135190	-	3237	3257	1	21	20	2C18	1	ArfGAP with RhoGAP domain, ankyrin repeat and PH domain 1 (ARAP1), transcript variant 4, mRNA
1010723	CTCAGCTCTTCCTCATCCACA	21	1	NM_001005237	+	302	322	1	21	20	11C9	1	olfactory receptor, family 51, subfamily G, member 1 (OR51G1), mRNA
1022906	TTTTTCTTTTTTTCTCTAATT	21	1	NM_001031812	+	2156	2176	1	21	20	5C15	1	casein kinase 1, gamma 3 (CSNK1G3), transcript variant 2, mRNA
1022906	TTTTTCTTTTTTTCTCTAATT	21	1	NM_001044722	+	2132	2152	1	21	20	5C15	1	casein kinase 1, gamma 3 (CSNK1G3), transcript variant 3, mRNA
1022906	TTTTTCTTTTTTTCTCTAATT	21	1	NM_004384	+	2228	2248	1	21	20	5C15	1	casein kinase 1, gamma 3 (CSNK1G3), transcript variant 1, mRNA
1022906	TTTTTCTTTTTTTCTCTAATT	21	1	NM_001044723	+	2252	2272	1	21	20	5C15	1	casein kinase 1, gamma 3 (CSNK1G3), transcript variant 4, mRNA
1077725	CTCAGAATCATCATCATCCTC	21	1	NM_004183	-	1478	1498	1	21	20	4G16	1	bestrophin 1 (BEST1), transcript variant 1, mRNA
1077725	CTCAGAATCATCATCATCCTC	21	1	NM_001139443	-	1290	1310	1	21	20	4G16	1	bestrophin 1 (BEST1), transcript variant 2, mRNA
1153395	TTAATCTTTTTCATTTTGTCTT	22	1	NM_014735	+	4822	4843	1	22	21	5C16	1	PHD finger protein 16 (PHF16), transcript variant 1, mRNA
1153395	TTAATCTTTTTCATTTTGTCTT	22	1	NM_001077445	+	4575	4596	1	22	21	5C16	1	PHD finger protein 16 (PHF16), transcript variant 2, mRNA
1166373	TGGGTTTTGTTTTTGTTTTTT	21	1	NM_016654	-	2258	2277	2	21	20	20	1	GA binding protein transcription factor, beta subunit 1 (GABPB1), transcript variant beta-2, mRNA
1166373	TGGGTTTTGTTTTTGTTTTTT	21	1	NM_005254	-	2294	2313	2	21	20	20	1	GA binding protein transcription factor, beta subunit 1 (GABPB1), transcript variant beta-1, mRNA
1171888	TTTGGGTTTTGTTTTTGTTTT	21	1	NM_152309	+	4306	4325	2	21	20	20	1	phosphoinositide-3-kinase adaptor protein 1 (PIK3AP1), mRNA
1171888	TTTGGGTTTTGTTTTTGTTTT	21	1	NM_015291	+	5911	5931	1	21	20	7T13	1	DnaJ (Hsp40) homolog, subfamily C, member 16 (DNAJC16), mRNA
1171888	TTTGGGTTTTGTTTTTGTTTT	21	1	NM_015199	+	3879	3899	1	21	20	16G4	1	ankyrin repeat domain 28 (ANKRD28), transcript variant 1, mRNA
1171888	TTTGGGTTTTGTTTTTGTTTT	21	1	NM_001195098	+	3923	3943	1	21	20	16G4	1	ankyrin repeat domain 28 (ANKRD28), transcript variant 2, mRNA
1171888	TTTGGGTTTTGTTTTTGTTTT	21	1	NM_001195099	+	3614	3634	1	21	20	16G4	1	ankyrin repeat domain 28 (ANKRD28), transcript variant 3, mRNA
1171888	TTTGGGTTTTGTTTTTGTTTT	21	1	NM_001206	+	2306	2326	1	21	20	5G15	1	Kruppel-like factor 9 (KLF9), mRNA
1171888	TTTGGGTTTTGTTTTTGTTTT	21	1	NM_170741	+	2989	3009	1	21	20	4G16	1	potassium inwardly-rectifying channel, subfamily J, member 16 (KCNJ16), transcript variant 2, mRNA
1171888	TTTGGGTTTTGTTTTTGTTTT	21	1	NM_170742	+	3077	3097	1	21	20	4G16	1	potassium inwardly-rectifying channel, subfamily J, member 16 (KCNJ16), transcript variant 3, mRNA
1171888	TTTGGGTTTTGTTTTTGTTTT	21	1	NM_018658	+	3070	3090	1	21	20	4G16	1	potassium inwardly-rectifying channel, subfamily J, member 16 (KCNJ16), transcript variant 1, mRNA
1198261	AATTATTTCTACTTTGGCATC	21	1	NM_033026	-	10919	10939	1	21	20	12T8	1	piccolo (presynaptic cytomatrix protein) (PCLO), transcript variant 1, mRNA
1198261	AATTATTTCTACTTTGGCATC	21	1	NM_014510	-	10919	10939	1	21	20	12T8	1	piccolo (presynaptic cytomatrix protein) (PCLO), transcript variant 2, mRNA
133	CCCGAACATCTCATAGAACTT	21	1158	NM_004850	+	4525	4545	1	21	19	5A6A8	2	Rho-associated, coiled-coil containing protein kinase 2 (ROCK2), mRNA
137	TACCAGATTCTGATCTTCCTCA	22	1149	NM_001410	-	10253	10273	2	22	20	6T14	2	multiple EGF-like-domains 8 (MEGF8), mRNA
219	TACCAGATTCTGATCTTCCTC	21	724	NM_001410	-	10254	10273	2	21	19	6T13	2	multiple EGF-like-domains 8 (MEGF8), mRNA
415	TAAGTGAGGTTTGATTAAGAAT	22	405	NM_021224	-	7823	7843	2	22	20	4G16	2	zinc finger protein 462 (ZNF462), mRNA
578	CAGCATCCAAATCCCTTCCTG	21	299	NM_182645	+	1615	1635	1	21	19	4A4A11	2	vestigial like 2 (Drosophila) (VGLL2), transcript variant 1, mRNA
578	CAGCATCCAAATCCCTTCCTG	21	299	NM_153453	+	1109	1129	1	21	19	4A4A11	2	vestigial like 2 (Drosophila) (VGLL2), transcript variant 2, mRNA
912	CTGACATGACCTTCAGAAGGCT	22	199	NM_173562	-	3103	3124	1	22	20	10C8G2	2	potassium channel tetramerisation domain containing 20 (KCTD20), mRNA
1122	GACCAGATCAAGAAGATGAGC	21	163	NM_016410	+	339	358	1	20	19	2C17	2	charged multivesicular body protein 5 (CHMP5), transcript variant 1, mRNA
1122	GACCAGATCAAGAAGATGAGC	21	163	NM_001195536	+	339	358	1	20	19	2C17	2	charged multivesicular body protein 5 (CHMP5), transcript variant 2, mRNA
1122	GACCAGATCAAGAAGATGAGC	21	163	NM_001649	+	3823	3843	1	21	19	13A1A5	2	shroom family member 2 (SHROOM2), mRNA
1122	GACCAGATCAAGAAGATGAGC	21	163	NM_016408	-	1145	1165	1	21	19	4A4A11	2	CDK5 regulatory subunit associated protein 1 (CDK5RAP1), transcript variant 1, mRNA
1122	GACCAGATCAAGAAGATGAGC	21	163	NM_016082	-	997	1017	1	21	19	4A4A11	2	CDK5 regulatory subunit associated protein 1 (CDK5RAP1), transcript variant 2, mRNA
1245	CAGACAGGATTGGAGCCACTG	21	149	NM_021969	-	575	595	1	21	19	7G4G8	2	nuclear receptor subfamily 0, group B, member 2 (NR0B2), mRNA
1287	GACAGGATTGGAGCCACTGAC	21	146	NR_036634	-	709	729	1	21	19	8T4C7	2	transforming growth factor, beta receptor III (TGFBR3), transcript variant 4, non-coding RNA
1287	GACAGGATTGGAGCCACTGAC	21	146	NM_001195684	-	448	468	1	21	19	8T4C7	2	transforming growth factor, beta receptor III (TGFBR3), transcript variant 3, mRNA
1287	GACAGGATTGGAGCCACTGAC	21	146	NM_003243	-	612	632	1	21	19	8T4C7	2	transforming growth factor, beta receptor III (TGFBR3), transcript variant 1, mRNA
1287	GACAGGATTGGAGCCACTGAC	21	146	NM_001195683	-	612	632	1	21	19	8T4C7	2	transforming growth factor, beta receptor III (TGFBR3), transcript variant 2, mRNA
1560	ATGATCAGTGTTGTCTTGGCT	21	121	NM_020945	-	7029	7049	1	21	19	7G1G11	2	WDFY family member 4 (WDFY4), mRNA
1577	ACCTTTGGAACTCTTAGCCAGA	22	120	NM_153333	+	1164	1185	1	22	20	4T4A12	2	transcription elongation factor A (SII)-like 8 (TCEAL8), transcript variant 1, mRNA
1577	ACCTTTGGAACTCTTAGCCAGA	22	120	NM_001006684	+	1091	1112	1	22	20	4T4A12	2	transcription elongation factor A (SII)-like 8 (TCEAL8), transcript variant 2, mRNA
1577	ACCTTTGGAACTCTTAGCCAGA	22	120	NM_152278	+	1139	1160	1	22	20	4T4A12	2	transcription elongation factor A (SII)-like 7 (TCEAL7), mRNA
1714	TTGACCAGAACTTCCACAGAA	21	110	NM_017848	-	3562	3582	1	21	19	14CA5	2	family with sequence similarity 120C (FAM120C), transcript variant 1, mRNA
2537	TGTCTCCTGCTCAGCTCCACT	21	75	NM_001003941	-	112	131	1	20	19	7T12	2	oxoglutarate (alpha-ketoglutarate) dehydrogenase (lipoamide) (OGDH), nuclear gene encoding mitochondrial protein, transcript variant 2, mRNA
2537	TGTCTCCTGCTCAGCTCCACT	21	75	NM_002541	-	112	131	1	20	19	7T12	2	oxoglutarate (alpha-ketoglutarate) dehydrogenase (lipoamide) (OGDH), nuclear gene encoding mitochondrial protein, transcript variant 1, mRNA
2537	TGTCTCCTGCTCAGCTCCACT	21	75	NM_001165036	-	112	131	1	20	19	7T12	2	oxoglutarate (alpha-ketoglutarate) dehydrogenase (lipoamide) (OGDH), nuclear gene encoding mitochondrial protein, transcript variant 3, mRNA
2537	TGTCTCCTGCTCAGCTCCACT	21	75	NM_014693	-	894	914	1	21	19	5C10C4	2	endothelin converting enzyme 2 (ECE2), transcript variant 1, mRNA
2537	TGTCTCCTGCTCAGCTCCACT	21	75	NM_001037324	-	558	578	1	21	19	5C10C4	2	endothelin converting enzyme 2 (ECE2), transcript variant 2, mRNA
2537	TGTCTCCTGCTCAGCTCCACT	21	75	NM_001100120	-	783	803	1	21	19	5C10C4	2	endothelin converting enzyme 2 (ECE2), transcript variant 4, mRNA
2537	TGTCTCCTGCTCAGCTCCACT	21	75	NM_001100121	-	645	665	1	21	19	5C10C4	2	endothelin converting enzyme 2 (ECE2), transcript variant 5, mRNA
2548	ACCAGATTCTGATCTTCCTCAA	22	75	NM_001410	-	10253	10273	1	21	20	6T14	2	multiple EGF-like-domains 8 (MEGF8), mRNA
2581	AATAGGGATATACACATGCTG	21	74	NM_015213	-	1269	1289	1	21	19	8T3C8	2	DENN/MADD domain containing 5A (DENND5A), transcript variant 1, mRNA
2581	AATAGGGATATACACATGCTG	21	74	NM_001243254	-	1269	1289	1	21	19	8T3C8	2	DENN/MADD domain containing 5A (DENND5A), transcript variant 2, mRNA
2596	TTGAGGAAGATCAGAATCTGGT	22	73	NM_001410	+	10253	10273	2	22	20	14A6	2	multiple EGF-like-domains 8 (MEGF8), mRNA
2614	TAACAAGGGCTTAGAAAATCTT	22	73	NM_017423	-	3052	3073	1	22	20	12A4A4	2	UDP-N-acetyl-alpha-D-galactosamine:polypeptide N-acetylgalactosaminyltransferase 7 (GalNAc-T7) (GALNT7), mRNA
2742	ACCTTTGGAACTCTTAGCCAG	21	69	NM_153333	+	1164	1184	1	21	19	4T4A11	2	transcription elongation factor A (SII)-like 8 (TCEAL8), transcript variant 1, mRNA
2742	ACCTTTGGAACTCTTAGCCAG	21	69	NM_001006684	+	1091	1111	1	21	19	4T4A11	2	transcription elongation factor A (SII)-like 8 (TCEAL8), transcript variant 2, mRNA
2742	ACCTTTGGAACTCTTAGCCAG	21	69	NM_152278	+	1139	1159	1	21	19	4T4A11	2	transcription elongation factor A (SII)-like 7 (TCEAL7), mRNA
2803	TGCTCATCTTCTTGATCTGGTC	22	68	NM_001649	-	3823	3844	1	22	20	6T1T13	2	shroom family member 2 (SHROOM2), mRNA
2803	TGCTCATCTTCTTGATCTGGTC	22	68	NM_016408	+	1144	1165	1	22	20	12T4T4	2	CDK5 regulatory subunit associated protein 1 (CDK5RAP1), transcript variant 1, mRNA
2803	TGCTCATCTTCTTGATCTGGTC	22	68	NM_016082	+	996	1017	1	22	20	12T4T4	2	CDK5 regulatory subunit associated protein 1 (CDK5RAP1), transcript variant 2, mRNA
2807	CTGAGTTCTGTCTTGTTGGCA	21	68	NM_173625	-	95	115	1	21	19	5T3G11	2	chromosome 17 open reading frame 78 (C17orf78), mRNA
2907	CATGCTGTCGAACTAATGGCA	21	66	NM_015245	-	1250	1270	1	21	19	9G3T7	2	ankyrin repeat and sterile alpha motif domain containing 1A (ANKS1A), mRNA
2985	GAATAAATATGGCTGTCAGGTC	22	64	NM_002813	-	2193	2214	1	22	20	5AA15	2	proteasome (prosome, macropain) 26S subunit, non-ATPase, 9 (PSMD9), mRNA
2997	TAATGTGATGATTTGTAAGACT	22	64	NM_001080546	+	1443	1464	1	22	20	9G5T6	2	transmembrane protein 218 (TMEM218), mRNA
3011	CAATTCAATCTTGTCGAAGTT	21	64	NM_015055	-	349	368	2	21	19	14G5	2	SWAP switching B-cell complex 70kDa subunit (SWAP70), mRNA
3123	GCTCATCTTCTTGATCTGGTC	21	62	NM_016410	-	339	358	2	21	19	17G2	2	charged multivesicular body protein 5 (CHMP5), transcript variant 1, mRNA
3123	GCTCATCTTCTTGATCTGGTC	21	62	NM_001195536	-	339	358	2	21	19	17G2	2	charged multivesicular body protein 5 (CHMP5), transcript variant 2, mRNA
3123	GCTCATCTTCTTGATCTGGTC	21	62	NM_001649	-	3823	3843	1	21	19	5T1T13	2	shroom family member 2 (SHROOM2), mRNA
3123	GCTCATCTTCTTGATCTGGTC	21	62	NM_016408	+	1145	1165	1	21	19	11T4T4	2	CDK5 regulatory subunit associated protein 1 (CDK5RAP1), transcript variant 1, mRNA
3123	GCTCATCTTCTTGATCTGGTC	21	62	NM_016082	+	997	1017	1	21	19	11T4T4	2	CDK5 regulatory subunit associated protein 1 (CDK5RAP1), transcript variant 2, mRNA
3408	GAGGAAGATCAGAATCTGGTA	21	58	NM_001410	+	10254	10273	1	20	19	13A6	2	multiple EGF-like-domains 8 (MEGF8), mRNA
3589	CATTCATGGACATTTCTGTTA	21	54	NM_007072	+	1922	1942	1	21	19	7GG12	2	HERV-H LTR-associating 2 (HHLA2), mRNA
3781	TTGACCAGAACTTCCACAGAAA	22	52	NM_017848	-	3561	3582	1	22	20	14CA6	2	family with sequence similarity 120C (FAM120C), transcript variant 1, mRNA
3794	TCCCGAGGTCTTTGTATTTTG	21	52	NM_014023	+	3014	3034	1	21	19	4G10A5	2	WD repeat domain 37 (WDR37), mRNA
3969	ACCAGATCAAGAAGATGAGCA	21	50	NM_001649	+	3824	3844	1	21	19	12A1A6	2	shroom family member 2 (SHROOM2), mRNA
4118	TCTGAGCCACAAGCACCAAGA	21	48	NM_001115113	-	1391	1411	1	21	19	4A10C5	2	WD repeat domain 26 (WDR26), transcript variant 2, mRNA
4118	TCTGAGCCACAAGCACCAAGA	21	48	NM_025160	-	1439	1459	1	21	19	4A10C5	2	WD repeat domain 26 (WDR26), transcript variant 1, mRNA
4140	TTTGTCTGGAAAACCTTGACC	21	48	NM_018538	-	2796	2815	1	20	19	3G16	2	erythroblast membrane-associated protein (Scianna blood group) (ERMAP), transcript variant 2, mRNA
4140	TTTGTCTGGAAAACCTTGACC	21	48	NM_001017922	-	2900	2919	1	20	19	3G16	2	erythroblast membrane-associated protein (Scianna blood group) (ERMAP), transcript variant 1, mRNA
4353	AAGGAACGAGAAGTGCTGGCT	21	46	NM_006346	+	1566	1586	1	21	19	10A4C5	2	progesterone immunomodulatory binding factor 1 (PIBF1), mRNA
4441	CTGCTGAGAATGAAGTACCCAC	22	45	NM_000259	+	2585	2606	1	22	20	10T8C2	2	myosin VA (heavy chain 12, myoxin) (MYO5A), transcript variant 1, mRNA
4441	CTGCTGAGAATGAAGTACCCAC	22	45	NM_001142495	+	2585	2606	1	22	20	10T8C2	2	myosin VA (heavy chain 12, myoxin) (MYO5A), transcript variant 2, mRNA
4949	GAGGGCATTCTTGACAGATTG	21	41	NM_004521	+	3211	3231	1	21	19	11TG8	2	kinesin family member 5B (KIF5B), mRNA
5115	CAAAATACAAAGACCTCGGGA	21	40	NM_014023	-	3014	3034	1	21	19	5T10C4	2	WD repeat domain 37 (WDR37), mRNA
5304	GTCTTTTTCTTGGAGCTGGAA	21	38	NM_153373	-	1036	1056	1	21	19	7T1T11	2	alanine-glyoxylate aminotransferase 2-like 2 (AGXT2L2), mRNA
5874	TCCACAGAAATATCCGGATTG	21	35	NM_001002860	+	3140	3159	1	20	19	7A12	2	BTB (POZ) domain containing 7 (BTBD7), transcript variant 1, mRNA
5914	TCTTTTTCTTGGAGCTGGAAT	21	34	NM_012311	-	1100	1120	1	21	19	8T3A8	2	KIN, antigenic determinant of recA protein homolog (mouse) (KIN), transcript variant 1, mRNA
5914	TCTTTTTCTTGGAGCTGGAAT	21	34	NR_045609	-	1100	1120	1	21	19	8T3A8	2	KIN, antigenic determinant of recA protein homolog (mouse) (KIN), transcript variant 3, non-coding RNA
5914	TCTTTTTCTTGGAGCTGGAAT	21	34	NR_045610	-	1005	1025	1	21	19	8T3A8	2
5921	CAAGATTGAATTGCAACGGCT	21	34	NM_002712	-	1270	1289	1	20	19	7G12	2	protein phosphatase 1, regulatory subunit 7 (PPP1R7), mRNA
6050	AAAGGCATCTTCTTCCCCTCTT	22	34	NM_001164824	+	315	336	1	22	20	11C5C4	2	chromosome 1 open reading frame 212 (C1orf212), transcript variant 1, mRNA
6543	AATGCTACCAGATTCTGATCT	21	31	NR_038864	+	1890	1910	1	21	19	6A9G4	2	uncharacterized LOC401324 (LOC401324), non-coding RNA
6624	TTCTCAGAAGCATTGTAACATG	22	31	NM_004713	-	1281	1302	1	22	20	4C2A14	2	nuclear export mediator factor (NEMF), mRNA
6737	CAGGAAGGGATTTGGATGCTG	21	31	NM_182645	-	1615	1635	1	21	19	11T4T4	2	vestigial like 2 (Drosophila) (VGLL2), transcript variant 1, mRNA
6737	CAGGAAGGGATTTGGATGCTG	21	31	NM_153453	-	1109	1129	1	21	19	11T4T4	2	vestigial like 2 (Drosophila) (VGLL2), transcript variant 2, mRNA
7316	CGGATCTTCCTAACAACTGCT	21	28	NM_004079	+	2609	2628	2	21	19	10A9	2	cathepsin S (CTSS), transcript variant 1, mRNA
7316	CGGATCTTCCTAACAACTGCT	21	28	NM_001199739	+	2459	2478	2	21	19	10A9	2	cathepsin S (CTSS), transcript variant 2, mRNA
7395	CTTCCACTGTGAAAATGACTT	21	28	NM_001042749	-	4239	4259	1	21	19	8GT11	2	stromal antigen 2 (STAG2), transcript variant 1, mRNA
7395	CTTCCACTGTGAAAATGACTT	21	28	NM_001042750	-	4148	4168	1	21	19	8GT11	2	stromal antigen 2 (STAG2), transcript variant 2, mRNA
7395	CTTCCACTGTGAAAATGACTT	21	28	NM_001042751	-	4037	4057	1	21	19	8GT11	2	stromal antigen 2 (STAG2), transcript variant 3, mRNA
7395	CTTCCACTGTGAAAATGACTT	21	28	NM_006603	-	3972	3992	1	21	19	8GT11	2	stromal antigen 2 (STAG2), transcript variant 4, mRNA
7470	TGCTCATCTTCTTGATCTGGT	21	28	NM_001649	-	3824	3844	1	21	19	6T1T12	2	shroom family member 2 (SHROOM2), mRNA
7576	TCACAGCAGATCAAAGAGATT	21	28	NM_018141	+	1180	1200	1	21	19	15G1G3	2	mitochondrial ribosomal protein S10 (MRPS10), nuclear gene encoding mitochondrial protein, mRNA
8093	TTTTTGTCTAGAGAATCTCCT	21	26	NM_207661	-	1327	1347	1	21	19	5G4G10	2	zinc finger CCCH-type containing 14 (ZC3H14), transcript variant 3, mRNA
8093	TTTTTGTCTAGAGAATCTCCT	21	26	NM_207660	-	1479	1499	1	21	19	5G4G10	2	zinc finger CCCH-type containing 14 (ZC3H14), transcript variant 2, mRNA
8093	TTTTTGTCTAGAGAATCTCCT	21	26	NM_024824	-	1479	1499	1	21	19	5G4G10	2	zinc finger CCCH-type containing 14 (ZC3H14), transcript variant 1, mRNA
8093	TTTTTGTCTAGAGAATCTCCT	21	26	NM_001160103	-	1479	1499	1	21	19	5G4G10	2	zinc finger CCCH-type containing 14 (ZC3H14), transcript variant 5, mRNA
8093	TTTTTGTCTAGAGAATCTCCT	21	26	NM_001160104	-	1479	1499	1	21	19	5G4G10	2	zinc finger CCCH-type containing 14 (ZC3H14), transcript variant 6, mRNA
8319	TCCATGAATGGCTGTACTGTTT	22	25	NM_023071	-	1180	1201	1	22	20	10GC10	2	spermatogenesis associated, serine-rich 2 (SPATS2), mRNA
8438	CTTTTACAAAAGCCTGAGAGTT	22	25	NM_052872	+	190	210	2	22	20	4A16	2	interleukin 17F (IL17F), mRNA
8713	TCTGGCTAAGAGTTCCAAAGGT	22	24	NM_153333	-	1164	1185	1	22	20	12T4A4	2	transcription elongation factor A (SII)-like 8 (TCEAL8), transcript variant 1, mRNA
8713	TCTGGCTAAGAGTTCCAAAGGT	22	24	NM_001006684	-	1091	1112	1	22	20	12T4A4	2	transcription elongation factor A (SII)-like 8 (TCEAL8), transcript variant 2, mRNA
8713	TCTGGCTAAGAGTTCCAAAGGT	22	24	NM_152278	-	1139	1160	1	22	20	12T4A4	2	transcription elongation factor A (SII)-like 7 (TCEAL7), mRNA
8981	TTTTGTCTCCTGCTCAGCTCC	21	24	NM_138456	+	392	412	1	21	19	2T2T15	2	basic leucine zipper transcription factor, ATF-like 2 (BATF2), mRNA
9570	ATAGCTCATGGACCTGACAGC	21	22	NM_207122	-	3064	3083	1	20	19	12C7	2	exostosin 2 (EXT2), transcript variant 2, mRNA
9570	ATAGCTCATGGACCTGACAGC	21	22	NM_001178083	-	3094	3113	1	20	19	12C7	2	exostosin 2 (EXT2), transcript variant 3, mRNA
9570	ATAGCTCATGGACCTGACAGC	21	22	NM_000401	-	2885	2904	1	20	19	12C7	2	exostosin 2 (EXT2), transcript variant 1, mRNA
9782	CTTCCTGGAAGATAGACTTTG	21	22	NM_001145065	+	5152	5170	2	20	19	19	2	family with sequence similarity 190, member A (FAM190A), transcript variant 1, mRNA
10016	TGTCTTTATCAGCTCTGGGTG	21	21	NM_019897	-	117	137	1	21	19	7AT12	2	olfactory receptor, family 2, subfamily S, member 2 (OR2S2), mRNA
10238	AAGCGGGATCAAAAAGAAAGA	21	21	NR_033900	+	647	667	1	21	19	5G9G5	2	uncharacterized LOC285441 (LOC285441), non-coding RNA
10238	AAGCGGGATCAAAAAGAAAGA	21	21	NM_000128	-	2424	2444	1	21	19	5G9G5	2	coagulation factor XI (F11), mRNA
10404	ATAACAGTGTTGAGACAGCTT	21	21	NM_001206557	+	5540	5560	1	21	19	8G2G9	2	KIAA1432 (KIAA1432), transcript variant 3, mRNA
10404	ATAACAGTGTTGAGACAGCTT	21	21	NM_020829	+	5651	5671	1	21	19	8G2G9	2	KIAA1432 (KIAA1432), transcript variant 1, mRNA
10690	ACTTTTCCTAAGGCTTCCCTG	21	20	NR_038872	+	522	541	2	21	19	8A11	2	long intergenic non-protein coding RNA 317 (LINC00317), non-coding RNA
10690	ACTTTTCCTAAGGCTTCCCTG	21	20	NM_004319	+	6855	6875	1	21	19	11G4C4	2	astrotactin 1 (ASTN1), transcript variant 1, mRNA
10758	ACCTGAAATTGTAGTTATCTCT	22	20	NM_017759	+	10793	10814	1	22	20	7A8A5	2	INO80 complex subunit D (INO80D), mRNA
10897	TCCTAGATTCACAAGGGTATG	21	20	NM_018126	-	6028	6048	1	21	19	9C3A7	2	transmembrane protein 33 (TMEM33), mRNA
11200	CAGAATGCAAAGATCCAAGAT	21	19	NR_039982	-	4215	4233	3	21	19	19	2	uncharacterized LOC283547 (LOC283547), non-coding RNA
11751	CTTAGACAGCATCCAAATCCC	21	18	NR_015352	-	2417	2437	1	21	19	15AA4	2	cat eye syndrome chromosome region, candidate 7 (non-protein coding) (CECR7), non-coding RNA
11812	ACTGATTCTCATTTCAAACTG	21	18	NM_007029	+	89	109	1	21	19	7CT12	2	stathmin-like 2 (STMN2), transcript variant 2, mRNA
11812	ACTGATTCTCATTTCAAACTG	21	18	NM_001199214	+	89	109	1	21	19	7CT12	2	stathmin-like 2 (STMN2), transcript variant 1, mRNA
11919	TTCCATACAATGTTTTTTCTG	21	18	NM_014701	-	1222	1242	1	21	19	6A3T10	2	SECIS binding protein 2-like (SECISBP2L), transcript variant 2, mRNA
11919	TTCCATACAATGTTTTTTCTG	21	18	NM_001193489	-	1222	1242	1	21	19	6A3T10	2	SECIS binding protein 2-like (SECISBP2L), transcript variant 1, mRNA
11927	CCATCCTGCTGAGCTTTGTCAC	22	18	NM_172239	+	1703	1723	1	21	20	17G3	2	REX1, RNA exonuclease 1 homolog (S. cerevisiae)-like 1 (REXO1L1), mRNA
11927	CCATCCTGCTGAGCTTTGTCAC	22	18	NR_003594	+	719	739	1	21	20	17G3	2	REX1, RNA exonuclease 1 homolog (S. cerevisiae)-like 2 (pseudogene) (REXO1L2P), non-coding RNA
11995	ATGAATGAAGATCAGGTGAAGA	22	18	NM_173516	+	535	556	1	22	20	11T4T5	2	poly(A)-specific ribonuclease (PARN)-like domain containing 1 (PNLDC1), mRNA
12100	CCTTCTTCCTCTTCTTCAACTG	22	18	NM_015934	-	1551	1570	2	21	20	20	2	NOP58 ribonucleoprotein homolog (yeast) (NOP58), mRNA
12100	CCTTCTTCCTCTTCTTCAACTG	22	18	NM_001008779	-	413	433	2	22	20	7C13	2	speedy homolog A (Xenopus laevis) (SPDYA), transcript variant 2, mRNA
12100	CCTTCTTCCTCTTCTTCAACTG	22	18	NR_036466	+	154	174	1	21	20	18A2	2	uncharacterized LOC100499405 (LOC100499405), non-coding RNA
12100	CCTTCTTCCTCTTCTTCAACTG	22	18	NM_001142634	-	527	547	2	22	20	7C13	2	speedy homolog A (Xenopus laevis) (SPDYA), transcript variant 3, mRNA
12100	CCTTCTTCCTCTTCTTCAACTG	22	18	NM_182756	-	601	621	2	22	20	7C13	2	speedy homolog A (Xenopus laevis) (SPDYA), transcript variant 1, mRNA
12535	TCCCTCTTGGTGCTTGTGGCT	21	17	NM_012454	-	5122	5142	1	21	19	14TG5	2	T-cell lymphoma invasion and metastasis 2 (TIAM2), transcript variant 1, mRNA
12535	TCCCTCTTGGTGCTTGTGGCT	21	17	NM_001010927	-	1874	1894	1	21	19	14TG5	2	T-cell lymphoma invasion and metastasis 2 (TIAM2), transcript variant 2, mRNA
12535	TCCCTCTTGGTGCTTGTGGCT	21	17	NM_016020	+	1983	2003	1	21	19	14TG5	2	transcription factor B1, mitochondrial (TFB1M), nuclear gene encoding mitochondrial protein, mRNA
12830	TTTCTCCAAAACCCTGCTGCT	21	17	NR_015430	+	843	863	1	21	19	15G1T3	2	chromosome 14 open reading frame 64 (C14orf64), non-coding RNA
12840	ATTGATAATTCAAAAGGAGCT	21	17	NM_052937	+	384	404	1	21	19	10C5G4	2	protein-L-isoaspartate (D-aspartate) O-methyltransferase domain containing 1 (PCMTD1), mRNA
12985	GACCAGATCAAGAAGATGAGCA	22	17	NM_001649	+	3823	3844	1	22	20	13A1A6	2	shroom family member 2 (SHROOM2), mRNA
12985	GACCAGATCAAGAAGATGAGCA	22	17	NM_016408	-	1144	1165	1	22	20	4A4A12	2	CDK5 regulatory subunit associated protein 1 (CDK5RAP1), transcript variant 1, mRNA
12985	GACCAGATCAAGAAGATGAGCA	22	17	NM_016082	-	996	1017	1	22	20	4A4A12	2	CDK5 regulatory subunit associated protein 1 (CDK5RAP1), transcript variant 2, mRNA
13149	CCCATCCTGCTGAGCTTTGTC	21	17	NM_172239	+	1703	1722	2	21	19	17G2	2	REX1, RNA exonuclease 1 homolog (S. cerevisiae)-like 1 (REXO1L1), mRNA
13149	CCCATCCTGCTGAGCTTTGTC	21	17	NR_003594	+	719	738	2	21	19	17G2	2	REX1, RNA exonuclease 1 homolog (S. cerevisiae)-like 2 (pseudogene) (REXO1L2P), non-coding RNA
13195	TTTTAATTTCTCCCCTGGCAA	21	17	NR_026778	+	2575	2595	1	21	19	11C1C7	2	HNRNPU antisense RNA 1 (non-protein coding) (HNRNPU-AS1), non-coding RNA
13233	TTGTGACAAGCAGCCTCAGAC	21	17	NM_203405	+	787	807	1	21	19	5A1A13	2	keratin associated protein 26-1 (KRTAP26-1), mRNA
13428	TTCAGATGGCATGTTGGGATC	21	16	NR_002591	-	9	28	2	21	19	17A2	2	small nucleolar RNA, C/D box 95 (SNORD95), small nucleolar RNA
13922	TTTGTCTTTATCAGCTCTGGG	21	16	NM_001622	+	104	124	1	21	19	8TA11	2	alpha-2-HS-glycoprotein (AHSG), mRNA
14194	TGCAGAACTTGCTTAAAAGCA	21	16	NM_001008224	-	130	150	1	21	19	11C4A4	2	uveal autoantigen with coiled-coil domains and ankyrin repeats (UACA), transcript variant 2, mRNA
14713	ATGTCTTTTTCTTGGAGCTGG	21	15	NM_003484	-	1080	1100	1	21	19	4C2T13	2	high mobility group AT-hook 2 (HMGA2), transcript variant 2, mRNA
14845	TATATTCCTGTGTTTCTGATT	21	15	NM_002040	+	2849	2868	1	20	19	9G10	2	GA binding protein transcription factor, alpha subunit 60kDa (GABPA), transcript variant 1, mRNA
14845	TATATTCCTGTGTTTCTGATT	21	15	NM_001197297	+	2412	2431	1	20	19	9G10	2	GA binding protein transcription factor, alpha subunit 60kDa (GABPA), transcript variant 2, mRNA
15091	TCTTCCTCTAAAATAGCATCCT	22	15	NM_018072	-	4459	4480	1	22	20	3T1C16	2	HEAT repeat containing 1 (HEATR1), mRNA
15200	ATGAGGAAGAGCTGAGAGCCT	21	15	NM_139319	+	2025	2045	1	21	19	15G1G3	2	solute carrier family 17 (sodium-dependent inorganic phosphate cotransporter), member 8 (SLC17A8), transcript variant 1, mRNA
15200	ATGAGGAAGAGCTGAGAGCCT	21	15	NM_001145288	+	1875	1895	1	21	19	15G1G3	2	solute carrier family 17 (sodium-dependent inorganic phosphate cotransporter), member 8 (SLC17A8), transcript variant 2, mRNA
15265	CTCATCTTCTTGATCTGGTCA	21	15	NM_016410	-	339	358	1	20	19	17G2	2	charged multivesicular body protein 5 (CHMP5), transcript variant 1, mRNA
15265	CTCATCTTCTTGATCTGGTCA	21	15	NM_001195536	-	339	358	1	20	19	17G2	2	charged multivesicular body protein 5 (CHMP5), transcript variant 2, mRNA
15312	GCAGGATGGGAATTTTTGATT	21	14	NM_001792	-	2528	2548	1	21	19	9G3T7	2	cadherin 2, type 1, N-cadherin (neuronal) (CDH2), mRNA
15901	AACAAGGGCTTAGAAAATCTT	21	14	NM_017423	-	3052	3072	1	21	19	11A4A4	2	UDP-N-acetyl-alpha-D-galactosamine:polypeptide N-acetylgalactosaminyltransferase 7 (GalNAc-T7) (GALNT7), mRNA
16125	AGAGAATCGCAAGGAAATGAT	21	14	NM_000251	+	2641	2660	2	21	19	14A5	2	mutS homolog 2, colon cancer, nonpolyposis type 1 (E. coli) (MSH2), mRNA
16315	ATCAAATCTAAGATTGCTTCT	21	14	NR_038381	-	911	931	1	21	19	6T4G9	2	TSC22D1 antisense RNA 1 (non-protein coding) (TSC22D1-AS1), non-coding RNA
16357	TGATGTTGTTTTCTGCTGACA	21	14	NM_016204	-	1734	1753	1	20	19	2A17	2	growth differentiation factor 2 (GDF2), mRNA
16407	ATTTCTCAGTCTGAAACCACCT	22	14	NR_015425	+	897	918	1	22	20	7AG13	2	uncharacterized LOC338588 (LOC338588), non-coding RNA
17292	TTAGAGAAAATACTGGACACTG	22	13	NM_003919	-	218	239	1	22	20	2A12G6	2	sarcoglycan, epsilon (SGCE), transcript variant 2, mRNA
17292	TTAGAGAAAATACTGGACACTG	22	13	NM_001099401	-	218	239	1	22	20	2A12G6	2	sarcoglycan, epsilon (SGCE), transcript variant 1, mRNA
17292	TTAGAGAAAATACTGGACACTG	22	13	NM_001099400	-	218	239	1	22	20	2A12G6	2	sarcoglycan, epsilon (SGCE), transcript variant 3, mRNA
17444	CTGAGCAGGAGACAAAACCTTC	22	13	NM_003352	+	153	174	1	22	20	4G6A10	2	SMT3 suppressor of mif two 3 homolog 1 (S. cerevisiae) (SUMO1), transcript variant 1, mRNA
17444	CTGAGCAGGAGACAAAACCTTC	22	13	NM_001005781	+	153	174	1	22	20	4G6A10	2	SMT3 suppressor of mif two 3 homolog 1 (S. cerevisiae) (SUMO1), transcript variant 2, mRNA
17444	CTGAGCAGGAGACAAAACCTTC	22	13	NR_002190	+	141	162	1	22	20	4G6A10	2	SUMO1 pseudogene 3 (SUMO1P3), non-coding RNA
17597	TCCATTCTGAACAATAGTTTT	21	13	NM_020771	-	3439	3459	1	21	19	8GA11	2	HECT domain and ankyrin repeat containing, E3 ubiquitin protein ligase 1 (HACE1), mRNA
18017	GGATCTTCCTAACAACTGCTT	21	12	NM_004079	+	2609	2628	1	20	19	10A9	2	cathepsin S (CTSS), transcript variant 1, mRNA
18017	GGATCTTCCTAACAACTGCTT	21	12	NM_001199739	+	2459	2478	1	20	19	10A9	2	cathepsin S (CTSS), transcript variant 2, mRNA
18622	TTAGACAAAACTATCAGAACT	21	12	NM_033402	+	3508	3528	1	21	19	5C10G4	2	leucine rich repeat and coiled-coil domain containing 1 (LRRCC1), mRNA
18855	GATAGCTCATGGACCTGACAG	21	12	NM_207122	-	3064	3083	2	21	19	12C7	2	exostosin 2 (EXT2), transcript variant 2, mRNA
18855	GATAGCTCATGGACCTGACAG	21	12	NM_001178083	-	3094	3113	2	21	19	12C7	2	exostosin 2 (EXT2), transcript variant 3, mRNA
18855	GATAGCTCATGGACCTGACAG	21	12	NM_000401	-	2885	2904	2	21	19	12C7	2	exostosin 2 (EXT2), transcript variant 1, mRNA
18977	CATTTCTTTTGAATTTCTCCT	21	12	NM_004271	+	309	329	1	21	19	3T1C15	2	lymphocyte antigen 86 (LY86), mRNA
19080	AATTTACAGTTCTGTTGTTGCT	22	12	NM_138333	-	2139	2160	1	22	20	4T5T11	2	family with sequence similarity 122A (FAM122A), mRNA
19135	ATCATTTCCTTGCGATTCTCT	21	12	NM_000251	-	2641	2660	1	20	19	5T14	2	mutS homolog 2, colon cancer, nonpolyposis type 1 (E. coli) (MSH2), mRNA
19306	GCAAAATACAAAGACCTCGGGA	22	12	NM_014023	-	3014	3035	1	22	20	6T10C4	2	WD repeat domain 37 (WDR37), mRNA
19466	AAGGCATCTTCTTCCCCTCTT	21	12	NM_001164824	+	316	336	1	21	19	10C5C4	2	chromosome 1 open reading frame 212 (C1orf212), transcript variant 1, mRNA
19984	TTTCTCAGTCTGAAACCACCT	21	11	NR_015425	+	898	918	1	21	19	6AG13	2	uncharacterized LOC338588 (LOC338588), non-coding RNA
19990	TCACAGTTCTGATAGTTTTGTC	22	11	NM_019894	-	2855	2875	1	21	20	13A7	2	transmembrane protease, serine 4 (TMPRSS4), transcript variant 1, mRNA
19990	TCACAGTTCTGATAGTTTTGTC	22	11	NM_001083947	-	2840	2860	1	21	20	13A7	2	transmembrane protease, serine 4 (TMPRSS4), transcript variant 3, mRNA
19990	TCACAGTTCTGATAGTTTTGTC	22	11	NM_001173551	-	2849	2869	1	21	20	13A7	2	transmembrane protease, serine 4 (TMPRSS4), transcript variant 4, mRNA
19990	TCACAGTTCTGATAGTTTTGTC	22	11	NM_001173552	-	2735	2755	1	21	20	13A7	2	transmembrane protease, serine 4 (TMPRSS4), transcript variant 5, mRNA
20184	CAAAAATCTTGGAAACCTGTT	21	11	NM_001145191	-	2360	2379	1	20	19	16C3	2	family with sequence similarity 200, member B (FAM200B), mRNA
20184	CAAAAATCTTGGAAACCTGTT	21	11	NM_000821	-	5596	5616	1	21	19	6T8C5	2	gamma-glutamyl carboxylase (GGCX), transcript variant 1, mRNA
20184	CAAAAATCTTGGAAACCTGTT	21	11	NM_001142269	-	5425	5445	1	21	19	6T8C5	2	gamma-glutamyl carboxylase (GGCX), transcript variant 2, mRNA
20334	TTCCTGGAAGATAGACTTTGC	21	11	NM_001145065	+	5152	5170	1	19	19	19	2	family with sequence similarity 190, member A (FAM190A), transcript variant 1, mRNA
20729	CCACTGTGAAAATGACTTATG	21	11	NM_013367	-	1173	1193	1	21	19	5G2A12	2	anaphase promoting complex subunit 4 (ANAPC4), mRNA
20864	TAGAAACAAAATGATAGGATT	21	11	NM_001813	+	6959	6978	2	21	19	5C14	2	centromere protein E, 312kDa (CENPE), mRNA
20911	CTGGACCAGCAAATACAAAGA	21	11	NM_153035	-	2707	2727	1	21	19	5C8A6	2	transcription elongation factor A (SII) N-terminal and central domain containing 2 (TCEANC2), mRNA
20960	AAGTGAGGTTTGATTAAGAATA	22	11	NM_021224	-	7823	7843	1	21	20	4G16	2	zinc finger protein 462 (ZNF462), mRNA
21724	TTTCTGTGGAAGTTCTGGTCA	21	10	NM_017848	+	3561	3581	1	21	19	6TG13	2	family with sequence similarity 120C (FAM120C), transcript variant 1, mRNA
22461	TGCTTGGCAATGTATAACATC	21	10	NM_052905	-	963	983	1	21	19	15A1C3	2	formin-like 2 (FMNL2), mRNA
23094	GTTTCTGGATTGTGTTCAATT	21	10	NM_001098511	-	524	544	1	21	19	9T2T8	2	kinesin heavy chain member 2A (KIF2A), transcript variant 2, mRNA
23094	GTTTCTGGATTGTGTTCAATT	21	10	NM_004520	-	524	544	1	21	19	9T2T8	2	kinesin heavy chain member 2A (KIF2A), transcript variant 1, mRNA
23094	GTTTCTGGATTGTGTTCAATT	21	10	NM_001243952	-	727	747	1	21	19	9T2T8	2	kinesin heavy chain member 2A (KIF2A), transcript variant 3, mRNA
23094	GTTTCTGGATTGTGTTCAATT	21	10	NM_001243953	-	524	544	1	21	19	9T2T8	2	kinesin heavy chain member 2A (KIF2A), transcript variant 4, mRNA
23344	CTCATCTTCTTGATCTGGTCT	21	10	NM_016410	-	339	358	1	20	19	17G2	2	charged multivesicular body protein 5 (CHMP5), transcript variant 1, mRNA
23344	CTCATCTTCTTGATCTGGTCT	21	10	NM_001195536	-	339	358	1	20	19	17G2	2	charged multivesicular body protein 5 (CHMP5), transcript variant 2, mRNA
23344	CTCATCTTCTTGATCTGGTCT	21	10	NM_001649	-	3822	3842	1	21	19	4T1T14	2	shroom family member 2 (SHROOM2), mRNA
23344	CTCATCTTCTTGATCTGGTCT	21	10	NM_016408	+	1146	1166	1	21	19	10T4T5	2	CDK5 regulatory subunit associated protein 1 (CDK5RAP1), transcript variant 1, mRNA
23344	CTCATCTTCTTGATCTGGTCT	21	10	NM_016082	+	998	1018	1	21	19	10T4T5	2	CDK5 regulatory subunit associated protein 1 (CDK5RAP1), transcript variant 2, mRNA
23416	ATTGTAGTTATCTCTTTTCCT	21	10	NM_001735	+	568	588	1	21	19	4T1G14	2	complement component 5 (C5), mRNA
23469	TAGAAAGTATCTTTGGCACTA	21	10	NM_020919	-	3453	3472	1	20	19	10C9	2	amyotrophic lateral sclerosis 2 (juvenile) (ALS2), transcript variant 1, mRNA
24045	TTTTTCAAAACTTGGGGACCA	21	10	NM_001650	+	3845	3865	1	21	19	2T2C15	2	aquaporin 4 (AQP4), transcript variant a, mRNA
24045	TTTTTCAAAACTTGGGGACCA	21	10	NM_004028	+	3765	3785	1	21	19	2T2C15	2	aquaporin 4 (AQP4), transcript variant b, mRNA
24375	TTATGTCATGGACAGATTCCA	21	9	NM_025134	+	9829	9849	1	21	19	12C1G6	2	chromodomain helicase DNA binding protein 9 (CHD9), mRNA
24565	TTCAAACCTTAACACTCAGTC	21	9	NR_026995	-	1444	1464	1	21	19	5A2T12	2	uncharacterized LOC91149 (LOC91149), non-coding RNA
24597	TTTGTAGACATTTCTTCCACT	21	9	NM_013320	-	1094	1114	1	21	19	7A3T9	2	host cell factor C2 (HCFC2), mRNA
24836	AAAGACTGTGATTTCCAAACT	21	9	NM_001008215	+	621	641	1	21	19	9G4C6	2	cytochrome C oxidase assembly factor 5 (COA5), mRNA
24916	CCAGATTCTGATCTTCCTCAA	21	9	NM_001410	-	10253	10272	1	20	19	5T14	2	multiple EGF-like-domains 8 (MEGF8), mRNA
24975	GGAGCCACTGACATGACCTTC	21	9	NM_001702	+	2521	2541	1	21	19	14G1C4	2	brain-specific angiogenesis inhibitor 1 (BAI1), mRNA
25229	ATTGTGATTTTCTAAGTGAGGT	22	9	NM_001002843	+	2229	2250	1	22	20	10T8G2	2	zinc finger protein 280D (ZNF280D), transcript variant 2, mRNA
25229	ATTGTGATTTTCTAAGTGAGGT	22	9	NM_017661	+	2298	2319	1	22	20	10T8G2	2	zinc finger protein 280D (ZNF280D), transcript variant 1, mRNA
25648	TTAATTTCAAGATGTCTGGATT	22	9	NM_018042	-	976	997	1	22	20	10G4C6	2	schlafen family member 12 (SLFN12), mRNA
25895	AGAAATGTTTAAAGCTGTCTC	21	9	NR_027055	+	1580	1599	1	20	19	13G6	2	family with sequence similarity 41, member C (FAM41C), non-coding RNA
26281	CTCAGGTGCCTGGAGATCAGCT	22	9	NM_005957	-	5300	5321	1	22	20	6T7G7	2	methylenetetrahydrofolate reductase (NAD(P)H) (MTHFR), mRNA
26909	TGACCAGATCAAGAAGATGAG	21	9	NM_016410	+	339	358	2	21	19	2C17	2	charged multivesicular body protein 5 (CHMP5), transcript variant 1, mRNA
26909	TGACCAGATCAAGAAGATGAG	21	9	NM_001195536	+	339	358	2	21	19	2C17	2	charged multivesicular body protein 5 (CHMP5), transcript variant 2, mRNA
27506	CCCATCCTGCTGAGCTTTGTCA	22	8	NM_172239	+	1703	1723	2	22	20	17G3	2	REX1, RNA exonuclease 1 homolog (S. cerevisiae)-like 1 (REXO1L1), mRNA
27506	CCCATCCTGCTGAGCTTTGTCA	22	8	NR_003594	+	719	739	2	22	20	17G3	2	REX1, RNA exonuclease 1 homolog (S. cerevisiae)-like 2 (pseudogene) (REXO1L2P), non-coding RNA
27851	ATTCATGGACATTTCTGTTAG	21	8	NR_001544	-	401	421	1	21	19	9CA10	2	non-protein coding RNA 185 (NCRNA00185), non-coding RNA
27949	AGTGAGGTTTGATTAAGAATA	21	8	NM_021224	-	7823	7842	1	20	19	3G16	2	zinc finger protein 462 (ZNF462), mRNA
28072	TTCTCAGTCTGAAACCACCTG	21	8	NR_015425	+	899	919	1	21	19	5AG14	2	uncharacterized LOC338588 (LOC338588), non-coding RNA
28497	TTCCAGCTCCAAGAAAAAGAC	21	8	NM_153373	+	1036	1056	1	21	19	11A1A7	2	alanine-glyoxylate aminotransferase 2-like 2 (AGXT2L2), mRNA
28681	TCTGAAGTTTTCTTTATGGTA	21	8	NM_020662	+	1472	1491	2	21	19	10C9	2	MRS2 magnesium homeostasis factor homolog (S. cerevisiae) (MRS2), mRNA
29009	ATACTCTGACGATTCTTCAGGA	22	8	NM_018442	-	2030	2051	1	22	20	2A6C12	2	DDB1 and CUL4 associated factor 6 (DCAF6), transcript variant 1, mRNA
29009	ATACTCTGACGATTCTTCAGGA	22	8	NM_001017977	-	1970	1991	1	22	20	2A6C12	2	DDB1 and CUL4 associated factor 6 (DCAF6), transcript variant 2, mRNA
29009	ATACTCTGACGATTCTTCAGGA	22	8	NM_001198956	-	2201	2222	1	22	20	2A6C12	2	DDB1 and CUL4 associated factor 6 (DCAF6), transcript variant 3, mRNA
29009	ATACTCTGACGATTCTTCAGGA	22	8	NM_001198957	-	2108	2129	1	22	20	2A6C12	2	DDB1 and CUL4 associated factor 6 (DCAF6), transcript variant 4, mRNA
29411	TCTGAAGGTCATGTCAGTGGC	21	8	NM_002471	-	1701	1719	3	21	19	19	2	myosin, heavy chain 6, cardiac muscle, alpha (MYH6), mRNA
30465	CCATGAATGGCTGTACTGTTT	21	8	NM_023071	-	1180	1200	1	21	19	9GC10	2	spermatogenesis associated, serine-rich 2 (SPATS2), mRNA
30648	CATCCTGCTGAGCTTTGTCAC	21	8	NM_172239	+	1704	1723	1	20	19	16G3	2	REX1, RNA exonuclease 1 homolog (S. cerevisiae)-like 1 (REXO1L1), mRNA
30648	CATCCTGCTGAGCTTTGTCAC	21	8	NR_003594	+	720	739	1	20	19	16G3	2	REX1, RNA exonuclease 1 homolog (S. cerevisiae)-like 2 (pseudogene) (REXO1L2P), non-coding RNA
30956	CTTCTTGATCTGGTCAAGGTT	21	8	NM_015155	-	627	647	1	21	19	9C5A5	2	La ribonucleoprotein domain family, member 4B (LARP4B), mRNA
30996	ACAGGATTGGAGCCACTGACA	21	8	NR_036634	-	708	728	1	21	19	7T4C8	2	transforming growth factor, beta receptor III (TGFBR3), transcript variant 4, non-coding RNA
30996	ACAGGATTGGAGCCACTGACA	21	8	NM_001195684	-	447	467	1	21	19	7T4C8	2	transforming growth factor, beta receptor III (TGFBR3), transcript variant 3, mRNA
30996	ACAGGATTGGAGCCACTGACA	21	8	NM_003243	-	611	631	1	21	19	7T4C8	2	transforming growth factor, beta receptor III (TGFBR3), transcript variant 1, mRNA
30996	ACAGGATTGGAGCCACTGACA	21	8	NM_001195683	-	611	631	1	21	19	7T4C8	2	transforming growth factor, beta receptor III (TGFBR3), transcript variant 2, mRNA
31293	TAAGTGAGGTTTGATTAAGAA	21	8	NM_021224	-	7824	7843	2	21	19	4G15	2	zinc finger protein 462 (ZNF462), mRNA
31583	AAGAGGGCATTCTTGACAGAT	21	8	NM_004521	+	3209	3229	1	21	19	13TG6	2	kinesin family member 5B (KIF5B), mRNA
31866	TAATAATGGGATTTTTGAACT	21	7	NM_001001486	-	413	433	1	21	19	6T9G4	2	ATPase, Ca++ transporting, type 2C, member 1 (ATP2C1), transcript variant 4, mRNA
31866	TAATAATGGGATTTTTGAACT	21	7	NM_001001487	-	413	433	1	21	19	6T9G4	2	ATPase, Ca++ transporting, type 2C, member 1 (ATP2C1), transcript variant 2, mRNA
31866	TAATAATGGGATTTTTGAACT	21	7	NM_001199180	-	631	651	1	21	19	6T9G4	2	ATPase, Ca++ transporting, type 2C, member 1 (ATP2C1), transcript variant 6, mRNA
31866	TAATAATGGGATTTTTGAACT	21	7	NM_001199179	-	642	662	1	21	19	6T9G4	2	ATPase, Ca++ transporting, type 2C, member 1 (ATP2C1), transcript variant 5, mRNA
31866	TAATAATGGGATTTTTGAACT	21	7	NM_001199183	-	504	524	1	21	19	6T9G4	2	ATPase, Ca++ transporting, type 2C, member 1 (ATP2C1), transcript variant 9, mRNA
31866	TAATAATGGGATTTTTGAACT	21	7	NM_001199184	-	504	524	1	21	19	6T9G4	2	ATPase, Ca++ transporting, type 2C, member 1 (ATP2C1), transcript variant 10, mRNA
31866	TAATAATGGGATTTTTGAACT	21	7	NM_001199181	-	631	651	1	21	19	6T9G4	2	ATPase, Ca++ transporting, type 2C, member 1 (ATP2C1), transcript variant 7, mRNA
31866	TAATAATGGGATTTTTGAACT	21	7	NM_001001485	-	736	756	1	21	19	6T9G4	2	ATPase, Ca++ transporting, type 2C, member 1 (ATP2C1), transcript variant 3, mRNA
31904	GTAGATAGAGAGCAAGCATCT	21	7	NM_170692	+	5007	5027	1	21	19	4A6G9	2	RAS protein activator like 2 (RASAL2), transcript variant 2, mRNA
31904	GTAGATAGAGAGCAAGCATCT	21	7	NM_004841	+	3945	3965	1	21	19	4A6G9	2	RAS protein activator like 2 (RASAL2), transcript variant 1, mRNA
32384	TCTTCCCCTCTTAGATAACTA	21	7	NM_001039937	+	1289	1308	1	20	19	16A3	2	integrator complex subunit 6 (INTS6), transcript variant 2, mRNA
32384	TCTTCCCCTCTTAGATAACTA	21	7	NM_012141	+	1781	1800	1	20	19	16A3	2	integrator complex subunit 6 (INTS6), transcript variant 1, mRNA
32593	TGAATGAAGATCAGGTGAAGA	21	7	NM_173516	+	536	556	1	21	19	10T4T5	2	poly(A)-specific ribonuclease (PARN)-like domain containing 1 (PNLDC1), mRNA
33626	TAAATGTAATTACTACCACTT	21	7	NM_032154	+	971	990	2	21	19	10A9	2	polycomb group ring finger 6 (PCGF6), transcript variant 2, mRNA
33626	TAAATGTAATTACTACCACTT	21	7	NM_001011663	+	1196	1215	2	21	19	10A9	2	polycomb group ring finger 6 (PCGF6), transcript variant 1, mRNA
33626	TAAATGTAATTACTACCACTT	21	7	NM_005591	-	2902	2922	1	21	19	4T1T14	2	MRE11 meiotic recombination 11 homolog A (S. cerevisiae) (MRE11A), transcript variant 1, mRNA
33626	TAAATGTAATTACTACCACTT	21	7	NM_005590	-	2925	2945	1	21	19	4T1T14	2	MRE11 meiotic recombination 11 homolog A (S. cerevisiae) (MRE11A), transcript variant 2, mRNA
34106	CAGTGGCTCCAATCCTGTCTG	21	7	NM_021969	+	575	595	1	21	19	8C4C7	2	nuclear receptor subfamily 0, group B, member 2 (NR0B2), mRNA
34121	TGTTTCTGGATTGTGTTCAATT	22	7	NM_001098511	-	524	545	1	22	20	10T2T8	2	kinesin heavy chain member 2A (KIF2A), transcript variant 2, mRNA
34121	TGTTTCTGGATTGTGTTCAATT	22	7	NM_004520	-	524	545	1	22	20	10T2T8	2	kinesin heavy chain member 2A (KIF2A), transcript variant 1, mRNA
34121	TGTTTCTGGATTGTGTTCAATT	22	7	NM_001243952	-	727	748	1	22	20	10T2T8	2	kinesin heavy chain member 2A (KIF2A), transcript variant 3, mRNA
34121	TGTTTCTGGATTGTGTTCAATT	22	7	NM_001243953	-	524	545	1	22	20	10T2T8	2	kinesin heavy chain member 2A (KIF2A), transcript variant 4, mRNA
34147	GTGGATGAGGAAGAGCTGAGA	21	7	NM_015242	+	3421	3440	1	20	19	17G2	2	ArfGAP with RhoGAP domain, ankyrin repeat and PH domain 1 (ARAP1), transcript variant 1, mRNA
34147	GTGGATGAGGAAGAGCTGAGA	21	7	NM_001040118	+	3610	3629	1	20	19	17G2	2	ArfGAP with RhoGAP domain, ankyrin repeat and PH domain 1 (ARAP1), transcript variant 3, mRNA
34147	GTGGATGAGGAAGAGCTGAGA	21	7	NM_001135190	+	3238	3257	1	20	19	17G2	2	ArfGAP with RhoGAP domain, ankyrin repeat and PH domain 1 (ARAP1), transcript variant 4, mRNA
34147	GTGGATGAGGAAGAGCTGAGA	21	7	NM_001005237	-	302	321	1	20	19	8G11	2	olfactory receptor, family 51, subfamily G, member 1 (OR51G1), mRNA
34665	ATCCCAGAAGCCCCATGCTGA	21	7	NM_003776	+	501	521	1	21	19	5A5C9	2	mitochondrial ribosomal protein L40 (MRPL40), nuclear gene encoding mitochondrial protein, mRNA
34964	AACCCTTGAAGAACTTTTGAA	21	7	NM_024894	+	1973	1993	1	21	19	12A1T6	2	nucleolar protein 10 (NOL10), mRNA
35032	CAAAATACAAAGACCTCGGGAT	22	7	NM_014023	-	3013	3034	1	22	20	5T10C5	2	WD repeat domain 37 (WDR37), mRNA
35969	TTTTGTCTGGAAAACCTTGAC	21	7	NM_018538	-	2796	2815	2	21	19	3G16	2	erythroblast membrane-associated protein (Scianna blood group) (ERMAP), transcript variant 2, mRNA
35969	TTTTGTCTGGAAAACCTTGAC	21	7	NM_001017922	-	2900	2919	2	21	19	3G16	2	erythroblast membrane-associated protein (Scianna blood group) (ERMAP), transcript variant 1, mRNA
36486	GAGCCACTGACATGACCTTCA	21	7	NM_002471	+	1701	1719	3	21	19	19	2	myosin, heavy chain 6, cardiac muscle, alpha (MYH6), mRNA
36707	AAGGAGGTCTGTAGCTGCAGC	21	7	NM_138342	-	956	976	1	21	19	4A4T11	2	galactosidase, beta 1-like 2 (GLB1L2), mRNA
36938	GTAAAGCTGTTGTAGATTCTT	21	7	NM_004264	-	266	286	1	21	19	7T1T11	2	mediator complex subunit 21 (MED21), mRNA
37231	TTGTCTCCTGCTCAGCTCCAC	21	7	NM_001003941	-	112	131	2	21	19	7T12	2	oxoglutarate (alpha-ketoglutarate) dehydrogenase (lipoamide) (OGDH), nuclear gene encoding mitochondrial protein, transcript variant 2, mRNA
37231	TTGTCTCCTGCTCAGCTCCAC	21	7	NM_002541	-	112	131	2	21	19	7T12	2	oxoglutarate (alpha-ketoglutarate) dehydrogenase (lipoamide) (OGDH), nuclear gene encoding mitochondrial protein, transcript variant 1, mRNA
37231	TTGTCTCCTGCTCAGCTCCAC	21	7	NM_001165036	-	112	131	2	21	19	7T12	2	oxoglutarate (alpha-ketoglutarate) dehydrogenase (lipoamide) (OGDH), nuclear gene encoding mitochondrial protein, transcript variant 3, mRNA
37516	CGAGATCTTAGATTCTTTCTT	21	6	NM_000363	-	249	268	2	21	19	13C6	2	troponin I type 3 (cardiac) (TNNI3), mRNA
38282	TACAGATTCCAGTTTGCCTTG	21	6	NM_002813	+	2080	2100	1	21	19	7T4T8	2	proteasome (prosome, macropain) 26S subunit, non-ATPase, 9 (PSMD9), mRNA
38364	TGTTTTCAGAGATTGTTGACA	21	6	NM_021930	+	1531	1550	1	20	19	13T6	2	RAD50 interactor 1 (RINT1), mRNA
38850	CATTTTTAGCTTTGGACATGA	21	6	NM_005441	+	2003	2023	1	21	19	8G3T8	2	chromatin assembly factor 1, subunit B (p60) (CHAF1B), mRNA
39373	CCTGGAAATCATCATGTATTG	21	6	NM_023110	+	2064	2084	1	21	19	6A8G5	2	fibroblast growth factor receptor 1 (FGFR1), transcript variant 1, mRNA
39373	CCTGGAAATCATCATGTATTG	21	6	NM_001174063	+	2064	2084	1	21	19	6A8G5	2	fibroblast growth factor receptor 1 (FGFR1), transcript variant 10, mRNA
39373	CCTGGAAATCATCATGTATTG	21	6	NM_001174064	+	2132	2152	1	21	19	6A8G5	2	fibroblast growth factor receptor 1 (FGFR1), transcript variant 11, mRNA
39373	CCTGGAAATCATCATGTATTG	21	6	NM_001174065	+	1378	1398	1	21	19	6A8G5	2	fibroblast growth factor receptor 1 (FGFR1), transcript variant 12, mRNA
39373	CCTGGAAATCATCATGTATTG	21	6	NM_001174066	+	1117	1137	1	21	19	6A8G5	2	fibroblast growth factor receptor 1 (FGFR1), transcript variant 13, mRNA
39373	CCTGGAAATCATCATGTATTG	21	6	NM_001174067	+	1538	1558	1	21	19	6A8G5	2	fibroblast growth factor receptor 1 (FGFR1), transcript variant 14, mRNA
39373	CCTGGAAATCATCATGTATTG	21	6	NM_015850	+	2058	2078	1	21	19	6A8G5	2	fibroblast growth factor receptor 1 (FGFR1), transcript variant 2, mRNA
39373	CCTGGAAATCATCATGTATTG	21	6	NM_023105	+	1797	1817	1	21	19	6A8G5	2	fibroblast growth factor receptor 1 (FGFR1), transcript variant 3, mRNA
39373	CCTGGAAATCATCATGTATTG	21	6	NM_023106	+	1791	1811	1	21	19	6A8G5	2	fibroblast growth factor receptor 1 (FGFR1), transcript variant 4, mRNA
39675	AGGAAAACATTGTTGCTTTGTT	22	6	NM_004447	-	3237	3257	2	22	20	3A17	2	epidermal growth factor receptor pathway substrate 8 (EPS8), mRNA
42099	ATTTTTGTCTAGAGAATCTCCT	22	6	NM_207661	-	1327	1348	1	22	20	6G4G10	2	zinc finger CCCH-type containing 14 (ZC3H14), transcript variant 3, mRNA
42099	ATTTTTGTCTAGAGAATCTCCT	22	6	NM_207660	-	1479	1500	1	22	20	6G4G10	2	zinc finger CCCH-type containing 14 (ZC3H14), transcript variant 2, mRNA
42099	ATTTTTGTCTAGAGAATCTCCT	22	6	NM_024824	-	1479	1500	1	22	20	6G4G10	2	zinc finger CCCH-type containing 14 (ZC3H14), transcript variant 1, mRNA
42099	ATTTTTGTCTAGAGAATCTCCT	22	6	NM_001160103	-	1479	1500	1	22	20	6G4G10	2	zinc finger CCCH-type containing 14 (ZC3H14), transcript variant 5, mRNA
42099	ATTTTTGTCTAGAGAATCTCCT	22	6	NM_001160104	-	1479	1500	1	22	20	6G4G10	2	zinc finger CCCH-type containing 14 (ZC3H14), transcript variant 6, mRNA
43099	TGAGCAGTATTTCTTTGAAAC	21	6	NM_015662	+	1245	1264	1	20	19	4C15	2	intraflagellar transport 172 homolog (Chlamydomonas) (IFT172), mRNA
43394	TTGAGAGAACAAAGAAATCTA	21	6	NM_001142386	+	11039	11058	1	20	19	9C10	2	pyruvate dehydrogenase kinase, isozyme 3 (PDK3), nuclear gene encoding mitochondrial protein, transcript variant 1, mRNA
43544	TTTTTGCTTTTTCTGAGGTCT	21	6	NM_005417	-	4089	4109	1	21	19	5GC14	2	v-src sarcoma (Schmidt-Ruppin A-2) viral oncogene homolog (avian) (SRC), transcript variant 1, mRNA
43544	TTTTTGCTTTTTCTGAGGTCT	21	6	NM_198291	-	3988	4008	1	21	19	5GC14	2	v-src sarcoma (Schmidt-Ruppin A-2) viral oncogene homolog (avian) (SRC), transcript variant 2, mRNA
43985	CATCCAATTCGTTGATCCACT	21	6	NM_006140	+	800	820	1	21	19	10G5C4	2	colony stimulating factor 2 receptor, alpha, low-affinity (granulocyte-macrophage) (CSF2RA), transcript variant 1, mRNA
43985	CATCCAATTCGTTGATCCACT	21	6	NM_172245	+	776	796	1	21	19	10G5C4	2	colony stimulating factor 2 receptor, alpha, low-affinity (granulocyte-macrophage) (CSF2RA), transcript variant 2, mRNA
43985	CATCCAATTCGTTGATCCACT	21	6	NM_172246	+	800	820	1	21	19	10G5C4	2	colony stimulating factor 2 receptor, alpha, low-affinity (granulocyte-macrophage) (CSF2RA), transcript variant 3, mRNA
43985	CATCCAATTCGTTGATCCACT	21	6	NM_172247	+	632	652	1	21	19	10G5C4	2	colony stimulating factor 2 receptor, alpha, low-affinity (granulocyte-macrophage) (CSF2RA), transcript variant 4, mRNA
43985	CATCCAATTCGTTGATCCACT	21	6	NM_172249	+	800	820	1	21	19	10G5C4	2	colony stimulating factor 2 receptor, alpha, low-affinity (granulocyte-macrophage) (CSF2RA), transcript variant 6, mRNA
43985	CATCCAATTCGTTGATCCACT	21	6	NM_001161529	+	928	948	1	21	19	10G5C4	2	colony stimulating factor 2 receptor, alpha, low-affinity (granulocyte-macrophage) (CSF2RA), transcript variant 7, mRNA
43985	CATCCAATTCGTTGATCCACT	21	6	NM_001161530	+	632	652	1	21	19	10G5C4	2	colony stimulating factor 2 receptor, alpha, low-affinity (granulocyte-macrophage) (CSF2RA), transcript variant 8, mRNA
43985	CATCCAATTCGTTGATCCACT	21	6	NM_001161531	+	800	820	1	21	19	10G5C4	2	colony stimulating factor 2 receptor, alpha, low-affinity (granulocyte-macrophage) (CSF2RA), transcript variant 9, mRNA
43985	CATCCAATTCGTTGATCCACT	21	6	NM_001161532	+	569	589	1	21	19	10G5C4	2	colony stimulating factor 2 receptor, alpha, low-affinity (granulocyte-macrophage) (CSF2RA), transcript variant 10, mRNA
43985	CATCCAATTCGTTGATCCACT	21	6	NR_027760	+	800	820	1	21	19	10G5C4	2	colony stimulating factor 2 receptor, alpha, low-affinity (granulocyte-macrophage) (CSF2RA), transcript variant 11, non-coding RNA
44756	AGCCAAGACAACACTGATCAT	21	6	NM_020945	+	7029	7049	1	21	19	11C1C7	2	WDFY family member 4 (WDFY4), mRNA
45142	AGCTGATCTCCAGGCACCTGAG	22	5	NM_005957	+	5300	5321	1	22	20	7C7A6	2	methylenetetrahydrofolate reductase (NAD(P)H) (MTHFR), mRNA
45393	TTCAACATATTTGAGGACATA	21	5	NM_015355	-	2709	2728	1	20	19	14G5	2	suppressor of zeste 12 homolog (Drosophila) (SUZ12), mRNA
45468	CTTCCAGGAAGGGATTTGGATG	22	5	NM_006581	+	722	743	1	22	20	7G2G11	2	fucosyltransferase 9 (alpha (1,3) fucosyltransferase) (FUT9), mRNA
46025	AGAGGGCATTCTTGACAGATTG	22	5	NM_004521	+	3210	3231	1	22	20	12TG8	2	kinesin family member 5B (KIF5B), mRNA
46938	TTCTTCACCTGATCTTCATTC	21	5	NM_173516	-	537	557	1	21	19	6A4A9	2	poly(A)-specific ribonuclease (PARN)-like domain containing 1 (PNLDC1), mRNA
47046	ATGCTCTGCTTGAAACTCACA	21	5	NM_178123	+	1703	1723	1	21	19	11G1A7	2	SEC14 and spectrin domains 1 (SESTD1), mRNA
47838	TTTTCCATTTCGTTAGCTTTCT	22	5	NM_018279	+	660	680	2	22	20	3C17	2	transmembrane protein 19 (TMEM19), mRNA
48014	GCATGCATTCCAGTGGCTCTA	21	5	NR_027055	-	574	593	2	21	19	2T17	2	family with sequence similarity 41, member C (FAM41C), non-coding RNA
48078	TAAGGTTTGAATAAAATTGAC	21	5	NM_003932	+	2436	2455	1	20	19	12A7	2	suppression of tumorigenicity 13 (colon carcinoma) (Hsp70 interacting protein) (ST13), mRNA
48326	AATCCCAGAAGCCCCATGCTGA	22	5	NM_003776	+	500	521	1	22	20	6A5C9	2	mitochondrial ribosomal protein L40 (MRPL40), nuclear gene encoding mitochondrial protein, mRNA
48520	ATGAAGGTTATTAAGCAAAGT	21	5	NM_000857	+	657	676	1	20	19	12A7	2	guanylate cyclase 1, soluble, beta 3 (GUCY1B3), mRNA
49594	GCTGATCTCCAGGCACCTGAG	21	5	NM_005957	+	5301	5321	1	21	19	6C7A6	2	methylenetetrahydrofolate reductase (NAD(P)H) (MTHFR), mRNA
50116	TTTTGCATAACTTTGAACCCA	21	5	NM_024590	+	2141	2161	1	21	19	11T4A4	2	arylsulfatase family, member J (ARSJ), mRNA
50426	ATTGCAAACTTGAATGATCCT	21	5	NM_176882	+	367	387	1	21	19	11G3G5	2	taste receptor, type 2, member 40 (TAS2R40), mRNA
51010	CAGGAGGTGGAGCATGAAGCT	21	5	NM_001103184	+	6729	6749	1	21	19	13A2A4	2	formin 1 (FMN1), mRNA
51214	AACGAAATTCTGGATAAAGAA	21	5	NM_019067	-	7604	7624	1	21	19	7TT12	2	guanine nucleotide binding protein-like 3 (nucleolar)-like (GNL3L), transcript variant 2, mRNA
51214	AACGAAATTCTGGATAAAGAA	21	5	NM_001184819	-	7721	7741	1	21	19	7TT12	2	guanine nucleotide binding protein-like 3 (nucleolar)-like (GNL3L), transcript variant 1, mRNA
51721	TTGAAGGTTTTGTCTCCTGCTC	22	5	NM_003352	-	155	176	1	22	20	12T6C2	2	SMT3 suppressor of mif two 3 homolog 1 (S. cerevisiae) (SUMO1), transcript variant 1, mRNA
51721	TTGAAGGTTTTGTCTCCTGCTC	22	5	NM_001005781	-	155	176	1	22	20	12T6C2	2	SMT3 suppressor of mif two 3 homolog 1 (S. cerevisiae) (SUMO1), transcript variant 2, mRNA
51721	TTGAAGGTTTTGTCTCCTGCTC	22	5	NR_002190	-	143	164	1	22	20	12T6C2	2	SUMO1 pseudogene 3 (SUMO1P3), non-coding RNA
52135	ATTAGACAAAACTATCAGAACT	22	5	NM_033402	+	3507	3528	1	22	20	6C10G4	2	leucine rich repeat and coiled-coil domain containing 1 (LRRCC1), mRNA
52456	TAGAAGACAAAATGAAAAAGAT	22	5	NM_014735	-	4825	4846	1	22	20	2G16G2	2	PHD finger protein 16 (PHF16), transcript variant 1, mRNA
52456	TAGAAGACAAAATGAAAAAGAT	22	5	NM_001077445	-	4578	4599	1	22	20	2G16G2	2	PHD finger protein 16 (PHF16), transcript variant 2, mRNA
52798	TCTTCCACTGTGAAAATGACT	21	5	NM_001042749	-	4240	4260	1	21	19	9GT10	2	stromal antigen 2 (STAG2), transcript variant 1, mRNA
52798	TCTTCCACTGTGAAAATGACT	21	5	NM_001042750	-	4149	4169	1	21	19	9GT10	2	stromal antigen 2 (STAG2), transcript variant 2, mRNA
52798	TCTTCCACTGTGAAAATGACT	21	5	NM_001042751	-	4038	4058	1	21	19	9GT10	2	stromal antigen 2 (STAG2), transcript variant 3, mRNA
52798	TCTTCCACTGTGAAAATGACT	21	5	NM_006603	-	3973	3993	1	21	19	9GT10	2	stromal antigen 2 (STAG2), transcript variant 4, mRNA
52882	CTGGCTAAGAGTTCCAAAGGT	21	5	NM_153333	-	1164	1184	1	21	19	11T4A4	2	transcription elongation factor A (SII)-like 8 (TCEAL8), transcript variant 1, mRNA
52882	CTGGCTAAGAGTTCCAAAGGT	21	5	NM_001006684	-	1091	1111	1	21	19	11T4A4	2	transcription elongation factor A (SII)-like 8 (TCEAL8), transcript variant 2, mRNA
52882	CTGGCTAAGAGTTCCAAAGGT	21	5	NM_152278	-	1139	1159	1	21	19	11T4A4	2	transcription elongation factor A (SII)-like 7 (TCEAL7), mRNA
53446	TCCACAATCTCTTTGATCTGCT	22	5	NM_006259	-	538	559	1	22	20	5A2C13	2	protein kinase, cGMP-dependent, type II (PRKG2), mRNA
54351	CCTTTGGAACATATGAATCTG	21	5	NM_016194	+	892	912	1	21	19	6G4T9	2	guanine nucleotide binding protein (G protein), beta 5 (GNB5), transcript variant 2, mRNA
54351	CCTTTGGAACATATGAATCTG	21	5	NM_006578	+	787	807	1	21	19	6G4T9	2	guanine nucleotide binding protein (G protein), beta 5 (GNB5), transcript variant 1, mRNA
54700	GTTCGCGATTGTTCATCTCTT	21	5	NM_199350	-	1490	1510	1	21	19	8T6T5	2	chromosome 9 open reading frame 50 (C9orf50), mRNA
54814	TGAGGAAGATCAGAATCTGGTA	22	5	NM_001410	+	10253	10273	1	21	20	14A6	2	multiple EGF-like-domains 8 (MEGF8), mRNA
55686	ATGGCAGGTGGCTCAATTGAG	21	5	NM_001081461	+	4906	4926	1	21	19	11C3A5	2	jumonji domain containing 6 (JMJD6), transcript variant 1, mRNA
56133	ATATCCCTATTTTTGATGATA	21	5	NM_001177664	-	5152	5171	1	20	19	16T3	2	RAP1 interacting factor homolog (yeast) (RIF1), transcript variant 3, mRNA
56133	ATATCCCTATTTTTGATGATA	21	5	NM_018151	-	5249	5268	1	20	19	16T3	2	RAP1 interacting factor homolog (yeast) (RIF1), transcript variant 1, mRNA
56133	ATATCCCTATTTTTGATGATA	21	5	NM_001177663	-	5249	5268	1	20	19	16T3	2	RAP1 interacting factor homolog (yeast) (RIF1), transcript variant 2, mRNA
56133	ATATCCCTATTTTTGATGATA	21	5	NM_001177665	-	5422	5441	1	20	19	16T3	2	RAP1 interacting factor homolog (yeast) (RIF1), transcript variant 4, mRNA
56413	AATGCTACCAGATTCTGATCTT	22	5	NR_026851	-	2658	2679	1	22	20	14C4C2	2	family with sequence similarity 75, member D5, pseudogene (FAM75D5), non-coding RNA
56973	TTAATTGTCAAAATCACTGCT	21	4	NM_001717	+	3878	3897	2	21	19	3T16	2	basonuclin 1 (BNC1), mRNA
57921	AGCCAGCACTTCTCGTTCCTT	21	4	NM_006346	-	1566	1586	1	21	19	5G4T10	2	progesterone immunomodulatory binding factor 1 (PIBF1), mRNA
58116	CCTTCCTGGAAGATAGACTTT	21	4	NM_001145065	+	5152	5170	3	21	19	19	2	family with sequence similarity 190, member A (FAM190A), transcript variant 1, mRNA
58274	TTTGGAATGCAAGCAATAGAT	21	4	NM_001101339	-	684	704	1	21	19	9C4A6	2	chromosome 12 open reading frame 77 (C12orf77), mRNA
58567	CTTGCTTATTCCATTCTTTAGA	22	4	NM_001105570	+	1896	1915	1	20	20	20	2	nudix (nucleoside diphosphate linked moiety X)-type motif 19 (NUDT19), nuclear gene encoding mitochondrial protein, mRNA
59216	CTTTTCCTAAGGCTTCCCTGG	21	4	NR_038872	+	522	541	1	20	19	8A11	2	long intergenic non-protein coding RNA 317 (LINC00317), non-coding RNA
59675	CAGCATGGGGCTTCTGGGATT	21	4	NM_003776	-	500	520	1	21	19	8G5T6	2	mitochondrial ribosomal protein L40 (MRPL40), nuclear gene encoding mitochondrial protein, mRNA
59675	CAGCATGGGGCTTCTGGGATT	21	4	NM_001845	+	2715	2735	1	21	19	5T6T8	2	collagen, type IV, alpha 1 (COL4A1), mRNA
59722	CTTTGTATTTGCTGGTCCAGT	21	4	NM_153035	+	2708	2728	1	21	19	5T8G6	2	transcription elongation factor A (SII) N-terminal and central domain containing 2 (TCEANC2), mRNA
59722	CTTTGTATTTGCTGGTCCAGT	21	4	NM_015474	+	3112	3132	1	21	19	6A9C4	2	SAM domain and HD domain 1 (SAMHD1), mRNA
59933	GAGATCTAGCTCTAATAGCCCT	22	4	NM_012395	-	3585	3606	1	22	20	5C2G13	2	cyclin-dependent kinase 14 (CDK14), mRNA
60016	TACCTCTTATTGCTTCAGTTG	21	4	NM_001164386	-	3871	3891	1	21	19	4T6G9	2	Rap guanine nucleotide exchange factor (GEF) 6 (RAPGEF6), transcript variant 1, mRNA
60016	TACCTCTTATTGCTTCAGTTG	21	4	NM_001164387	-	3886	3906	1	21	19	4T6G9	2	Rap guanine nucleotide exchange factor (GEF) 6 (RAPGEF6), transcript variant 3, mRNA
60016	TACCTCTTATTGCTTCAGTTG	21	4	NM_001164388	-	3871	3891	1	21	19	4T6G9	2	Rap guanine nucleotide exchange factor (GEF) 6 (RAPGEF6), transcript variant 4, mRNA
60016	TACCTCTTATTGCTTCAGTTG	21	4	NM_001164389	-	3847	3867	1	21	19	4T6G9	2	Rap guanine nucleotide exchange factor (GEF) 6 (RAPGEF6), transcript variant 5, mRNA
60016	TACCTCTTATTGCTTCAGTTG	21	4	NM_016340	-	3847	3867	1	21	19	4T6G9	2	Rap guanine nucleotide exchange factor (GEF) 6 (RAPGEF6), transcript variant 2, mRNA
60833	TCAAACTGTGAGCCATCGGCA	21	4	NM_004973	-	5606	5626	1	21	19	9G6C4	2	jumonji, AT rich interactive domain 2 (JARID2), mRNA
61152	TTGAGGAAGATCAGAATCTGG	21	4	NM_001410	+	10253	10272	2	21	19	14A5	2	multiple EGF-like-domains 8 (MEGF8), mRNA
61233	TTGTCTCCACTTATAGATATG	21	4	NM_022970	+	3201	3221	1	21	19	12A2G5	2	fibroblast growth factor receptor 2 (FGFR2), transcript variant 2, mRNA
61233	TTGTCTCCACTTATAGATATG	21	4	NM_000141	+	3198	3218	1	21	19	12A2G5	2	fibroblast growth factor receptor 2 (FGFR2), transcript variant 1, mRNA
61233	TTGTCTCCACTTATAGATATG	21	4	NM_001144914	+	2365	2385	1	21	19	12A2G5	2	fibroblast growth factor receptor 2 (FGFR2), transcript variant 4, mRNA
61233	TTGTCTCCACTTATAGATATG	21	4	NM_001144916	+	2647	2667	1	21	19	12A2G5	2	fibroblast growth factor receptor 2 (FGFR2), transcript variant 6, mRNA
61233	TTGTCTCCACTTATAGATATG	21	4	NM_001144917	+	2850	2870	1	21	19	12A2G5	2	fibroblast growth factor receptor 2 (FGFR2), transcript variant 7, mRNA
61233	TTGTCTCCACTTATAGATATG	21	4	NM_001144918	+	2847	2867	1	21	19	12A2G5	2	fibroblast growth factor receptor 2 (FGFR2), transcript variant 8, mRNA
61343	GAATGAAGATCAGGTGAAGAA	21	4	NM_173516	+	537	557	1	21	19	9T4T6	2	poly(A)-specific ribonuclease (PARN)-like domain containing 1 (PNLDC1), mRNA
61516	CTCATCTTCATCAAAGGCATC	21	4	NM_152284	-	643	663	1	21	19	6T9G4	2	charged multivesicular body protein 4C (CHMP4C), mRNA
61840	CATGCACGTCAGGATAAAATA	21	4	NM_006922	-	7418	7438	1	21	19	7GT12	2	sodium channel, voltage-gated, type III, alpha subunit (SCN3A), transcript variant 1, mRNA
61840	CATGCACGTCAGGATAAAATA	21	4	NM_001081676	-	7271	7291	1	21	19	7GT12	2	sodium channel, voltage-gated, type III, alpha subunit (SCN3A), transcript variant 2, mRNA
61840	CATGCACGTCAGGATAAAATA	21	4	NM_001081677	-	7271	7291	1	21	19	7GT12	2	sodium channel, voltage-gated, type III, alpha subunit (SCN3A), transcript variant 3, mRNA
61985	TACTTCTCCTGAAAGTTGGTT	21	4	NR_038948	+	1181	1201	1	21	19	12A1G6	2	uncharacterized LOC100506136 (LOC100506136), non-coding RNA
62202	CTTGCTCTGGTCTTGCATCTT	21	4	NM_015652	-	334	354	1	21	19	6C3T10	2	chromosome 10 open reading frame 12 (C10orf12), mRNA
62246	AACCACCATTTGTTCAGGAGT	21	4	NM_021615	+	5202	5222	1	21	19	10TG9	2	carbohydrate (N-acetylglucosamine 6-O) sulfotransferase 6 (CHST6), mRNA
62328	TATGAACTTAGAGAAAATACT	21	4	NM_016207	+	2104	2124	1	21	19	9A2G8	2	cleavage and polyadenylation specific factor 3, 73kDa (CPSF3), mRNA
62437	TCAGTGGAAGCTTTTACAAAA	21	4	NM_003274	+	1517	1537	1	21	19	15AC4	2	trafficking protein particle complex 10 (TRAPPC10), mRNA
62608	TTTGATGAAGATGAGTTTGAT	21	4	NM_002525	+	841	859	3	21	19	19	2	nardilysin (N-arginine dibasic convertase) (NRD1), transcript variant 1, mRNA
62608	TTTGATGAAGATGAGTTTGAT	21	4	NM_001101662	+	841	859	3	21	19	19	2	nardilysin (N-arginine dibasic convertase) (NRD1), transcript variant 2, mRNA
62608	TTTGATGAAGATGAGTTTGAT	21	4	NM_001242361	+	236	254	3	21	19	19	2	nardilysin (N-arginine dibasic convertase) (NRD1), transcript variant 3, mRNA
63072	ATTAGAATCTGATATAAAACA	21	4	NM_001160046	+	3168	3187	2	21	19	12A7	2	shugoshin-like 2 (S. pombe) (SGOL2), transcript variant 3, mRNA
63072	ATTAGAATCTGATATAAAACA	21	4	NM_152524	+	3168	3187	2	21	19	12A7	2	shugoshin-like 2 (S. pombe) (SGOL2), transcript variant 1, mRNA
63072	ATTAGAATCTGATATAAAACA	21	4	NM_001160033	+	3168	3187	2	21	19	12A7	2	shugoshin-like 2 (S. pombe) (SGOL2), transcript variant 2, mRNA
64254	ATGAGCAGTATTTCTTTGAAAC	22	4	NM_015662	+	1244	1264	1	21	20	5C15	2	intraflagellar transport 172 homolog (Chlamydomonas) (IFT172), mRNA
64385	CTTGCAAGCCTCAATGAATGCT	22	4	NM_030962	+	3840	3861	1	22	20	11C1A8	2	SET binding factor 2 (SBF2), mRNA
64643	TTTCTGTGTGTTGTGCTTAAT	21	4	NM_024838	-	206	226	1	21	19	3C1G15	2	threonine synthase-like 1 (S. cerevisiae) (THNSL1), mRNA
64721	CTTCTGATGAAAAGCTTGCTT	21	4	NM_175907	+	882	902	1	21	19	14CT5	2	zinc binding alcohol dehydrogenase domain containing 2 (ZADH2), mRNA
64746	CAAACCCAGTTGTATTCTGATT	22	4	NM_198459	-	665	686	1	22	20	2A9T9	2	DENN/MADD domain containing 2C (DENND2C), transcript variant 2, mRNA
64746	CAAACCCAGTTGTATTCTGATT	22	4	NM_001256404	-	1034	1055	1	22	20	2A9T9	2	DENN/MADD domain containing 2C (DENND2C), transcript variant 1, mRNA
64834	CTAGCCCCGAGAAGATCATGG	21	4	NM_177963	-	1197	1217	1	21	19	2A2C15	2	synaptotagmin XII (SYT12), transcript variant 1, mRNA
64834	CTAGCCCCGAGAAGATCATGG	21	4	NM_001177880	-	1288	1308	1	21	19	2A2C15	2	synaptotagmin XII (SYT12), transcript variant 2, mRNA
64929	TTAATGTGATGATTTGTAAGAC	22	4	NM_001080546	+	1442	1463	1	22	20	10G5T5	2	transmembrane protein 218 (TMEM218), mRNA
65066	TTTTTTTGGTAATAAGGGGTC	21	4	NR_038912	-	850	869	1	20	19	15G4	2	uncharacterized LOC100505978 (LOC100505978), non-coding RNA
67280	CCACAATCTCTTTGATCTGCTG	22	4	NM_006259	-	537	558	1	22	20	4A2C14	2	protein kinase, cGMP-dependent, type II (PRKG2), mRNA
67387	CAGCATGTGTATATCCCTATT	21	4	NM_015213	+	1269	1289	1	21	19	8G3A8	2	DENN/MADD domain containing 5A (DENND5A), transcript variant 1, mRNA
67387	CAGCATGTGTATATCCCTATT	21	4	NM_001243254	+	1269	1289	1	21	19	8G3A8	2	DENN/MADD domain containing 5A (DENND5A), transcript variant 2, mRNA
67459	ATCCCGAGGTCTTTGTATTTT	21	4	NM_014023	+	3013	3033	1	21	19	5G10A4	2	WD repeat domain 37 (WDR37), mRNA
68788	TTAGAATTCTTTTTTTAGAACT	22	4	NM_022166	-	8907	8928	1	22	20	2A14G4	2	xylosyltransferase I (XYLT1), mRNA
69329	TCATTTCTTTTGAATTTCTCCT	22	4	NM_004271	+	308	329	1	22	20	4T1C15	2	lymphocyte antigen 86 (LY86), mRNA
69391	TAAAGGACAATTGACATTCTT	21	4	NM_003428	+	5887	5906	2	21	19	17C2	2	zinc finger protein 84 (ZNF84), transcript variant 1, mRNA
69391	TAAAGGACAATTGACATTCTT	21	4	NM_001127372	+	5801	5820	2	21	19	17C2	2	zinc finger protein 84 (ZNF84), transcript variant 2, mRNA
69811	CTTCTTCATCAAACTCATCTT	21	4	NM_002525	-	846	865	2	21	19	3T16	2	nardilysin (N-arginine dibasic convertase) (NRD1), transcript variant 1, mRNA
69811	CTTCTTCATCAAACTCATCTT	21	4	NM_001101662	-	846	865	2	21	19	3T16	2	nardilysin (N-arginine dibasic convertase) (NRD1), transcript variant 2, mRNA
69811	CTTCTTCATCAAACTCATCTT	21	4	NM_001242361	-	241	260	2	21	19	3T16	2	nardilysin (N-arginine dibasic convertase) (NRD1), transcript variant 3, mRNA
69811	CTTCTTCATCAAACTCATCTT	21	4	NM_032305	-	646	666	1	21	19	11A4A4	2	polymerase (RNA) III (DNA directed) polypeptide G (32kD)-like (POLR3GL), mRNA
69811	CTTCTTCATCAAACTCATCTT	21	4	NM_015695	-	1569	1589	1	21	19	5T1A13	2	bromodomain and PHD finger containing, 3 (BRPF3), mRNA
70408	GGGCTATTAGAGCTAGATCTC	21	4	NM_012395	+	3586	3606	1	21	19	12C2G5	2	cyclin-dependent kinase 14 (CDK14), mRNA
70655	CTGAGCAGGAGACAAAACCTT	21	4	NM_003352	+	153	173	1	21	19	4G6A9	2	SMT3 suppressor of mif two 3 homolog 1 (S. cerevisiae) (SUMO1), transcript variant 1, mRNA
70655	CTGAGCAGGAGACAAAACCTT	21	4	NM_001005781	+	153	173	1	21	19	4G6A9	2	SMT3 suppressor of mif two 3 homolog 1 (S. cerevisiae) (SUMO1), transcript variant 2, mRNA
70655	CTGAGCAGGAGACAAAACCTT	21	4	NR_002190	+	141	161	1	21	19	4G6A9	2	SUMO1 pseudogene 3 (SUMO1P3), non-coding RNA
70747	ATGAGCTAACTCCTGAAAAGTT	22	4	NM_001042559	+	674	695	1	22	20	2G4A14	2	eukaryotic translation initiation factor 4 gamma, 2 (EIF4G2), transcript variant 2, mRNA
70747	ATGAGCTAACTCCTGAAAAGTT	22	4	NM_001172705	+	791	812	1	22	20	2G4A14	2	eukaryotic translation initiation factor 4 gamma, 2 (EIF4G2), transcript variant 3, mRNA
70747	ATGAGCTAACTCCTGAAAAGTT	22	4	NM_001418	+	674	695	1	22	20	2G4A14	2	eukaryotic translation initiation factor 4 gamma, 2 (EIF4G2), transcript variant 1, mRNA
71772	TTAAATTACAGTGAAGATATC	21	4	NM_014157	-	5091	5110	1	20	19	5T14	2	coiled-coil domain containing 113 (CCDC113), transcript variant 1, mRNA
71772	TTAAATTACAGTGAAGATATC	21	4	NM_001142302	-	4929	4948	1	20	19	5T14	2	coiled-coil domain containing 113 (CCDC113), transcript variant 2, mRNA
71772	TTAAATTACAGTGAAGATATC	21	4	NM_000855	+	9565	9585	1	21	19	10G5A4	2	guanylate cyclase 1, soluble, alpha 2 (GUCY1A2), transcript variant 2, mRNA
71772	TTAAATTACAGTGAAGATATC	21	4	NM_001256424	+	9658	9678	1	21	19	10G5A4	2	guanylate cyclase 1, soluble, alpha 2 (GUCY1A2), transcript variant 1, mRNA
72271	CTTTGGACACAATCACATCTT	21	4	NM_001143819	+	693	713	1	21	19	5G10A4	2	two pore segment channel 1 (TPCN1), transcript variant 1, mRNA
72271	CTTTGGACACAATCACATCTT	21	4	NM_017901	+	600	620	1	21	19	5G10A4	2	two pore segment channel 1 (TPCN1), transcript variant 2, mRNA
73080	GTTTCTTTGGACAGTATGGGA	21	4	NM_198460	+	800	819	2	21	19	15T4	2	guanylate binding protein family, member 6 (GBP6), mRNA
73747	ACTTTGGCATCTGTGGCTCTG	21	4	NM_133638	-	2891	2911	1	21	19	5G1C13	2	ADAM metallopeptidase with thrombospondin type 1 motif, 19 (ADAMTS19), mRNA
74014	ATCTGCTTCTCACTGTTTCCT	21	4	NM_198148	-	1073	1092	1	20	19	4G15	2	carboxypeptidase X (M14 family), member 2 (CPXM2), mRNA
75787	GTTCTGCAAGTTTTGCCTGTT	21	4	NM_004519	-	4131	4151	1	21	19	6C2G11	2	potassium voltage-gated channel, KQT-like subfamily, member 3 (KCNQ3), transcript variant 1, mRNA
75787	GTTCTGCAAGTTTTGCCTGTT	21	4	NM_001204824	-	3582	3602	1	21	19	6C2G11	2	potassium voltage-gated channel, KQT-like subfamily, member 3 (KCNQ3), transcript variant 2, mRNA
76395	CTGAAGGTCATGTCAGTGGCT	21	4	NM_002471	-	1701	1719	2	20	19	19	2	myosin, heavy chain 6, cardiac muscle, alpha (MYH6), mRNA
77691	TCTTGGACAAAGGAGTTTTGTG	22	3	NM_152446	-	4214	4235	1	22	20	2T15T3	2	centrosomal protein 128kDa (CEP128), mRNA
79112	CAGGCAGCACATTCTGGAAGC	21	3	NM_130466	-	4584	4602	1	19	19	19	2	ubiquitin protein ligase E3B (UBE3B), transcript variant 1, mRNA
79112	CAGGCAGCACATTCTGGAAGC	21	3	NM_183415	-	4239	4257	1	19	19	19	2	ubiquitin protein ligase E3B (UBE3B), transcript variant 3, mRNA
79408	TGAATGAAGATCAGGTGAAGAA	22	3	NM_173516	+	536	557	1	22	20	10T4T6	2	poly(A)-specific ribonuclease (PARN)-like domain containing 1 (PNLDC1), mRNA
80468	ATGATATTTTTGGAGAGCTGAT	22	3	NM_003893	-	1207	1227	2	22	20	4A16	2	LIM domain binding 1 (LDB1), transcript variant 3, mRNA
80468	ATGATATTTTTGGAGAGCTGAT	22	3	NM_001113407	-	1014	1034	2	22	20	4A16	2	LIM domain binding 1 (LDB1), transcript variant 1, mRNA
81587	AGATAATGTAGAAAGTGCTCT	21	3	NM_004063	+	2573	2592	1	20	19	9A10	2	cadherin 17, LI cadherin (liver-intestine) (CDH17), transcript variant 1, mRNA
81587	AGATAATGTAGAAAGTGCTCT	21	3	NM_001144663	+	2574	2593	1	20	19	9A10	2	cadherin 17, LI cadherin (liver-intestine) (CDH17), transcript variant 2, mRNA
82271	TCAAAGCATATAACAACTTCT	21	3	NM_001076675	+	2187	2206	2	21	19	15C4	2	zinc finger protein 626 (ZNF626), transcript variant 1, mRNA
84442	AGAATGCAAAGATCCAAGATA	21	3	NR_039982	-	4215	4233	2	20	19	19	2	uncharacterized LOC283547 (LOC283547), non-coding RNA
85947	ACTGAAGCTTTTGTCTGAATG	21	3	NM_018428	+	1172	1192	1	21	19	10T4T5	2	UTP6, small subunit (SSU) processome component, homolog (yeast) (UTP6), mRNA
86645	CTTTGCTTAATAACCTTCATT	21	3	NM_000857	-	657	676	1	20	19	7T12	2	guanylate cyclase 1, soluble, beta 3 (GUCY1B3), mRNA
87499	GCATACCCTTGTGAATCTAGGA	22	3	NM_018126	+	6027	6048	1	22	20	8T3G9	2	transmembrane protein 33 (TMEM33), mRNA
87552	TGCAGATAGAGAAGAATGAGA	21	3	NM_199351	+	2897	2917	1	21	19	4G5G10	2	immunoglobulin-like domain containing receptor 2 (ILDR2), mRNA
88259	AATGAAGATCAGGTGAAGAAA	21	3	NM_173516	+	538	558	1	21	19	8T4T7	2	poly(A)-specific ribonuclease (PARN)-like domain containing 1 (PNLDC1), mRNA
88727	CATCCAAATCCCTTCCTGGAAG	22	3	NM_006581	-	722	743	1	22	20	11C2C7	2	fucosyltransferase 9 (alpha (1,3) fucosyltransferase) (FUT9), mRNA
88951	TTTTCCATTTCGTTAGCTTTC	21	3	NM_018279	+	660	679	2	21	19	3C16	2	transmembrane protein 19 (TMEM19), mRNA
89537	TCTTTCTTTGTATTTGCTGGTC	22	3	NM_001102559	+	478	499	1	22	20	4T5T11	2	phosphatidic acid phosphatase type 2 domain containing 1B (PPAPDC1B), transcript variant 1, mRNA
89537	TCTTTCTTTGTATTTGCTGGTC	22	3	NM_032483	+	478	499	1	22	20	4T5T11	2	phosphatidic acid phosphatase type 2 domain containing 1B (PPAPDC1B), transcript variant 2, mRNA
89863	CATCAAAGGCATCTTCTTCCC	21	3	NM_012123	-	396	416	1	21	19	4A9T6	2	mitochondrial translation optimization 1 homolog (S. cerevisiae) (MTO1), nuclear gene encoding mitochondrial protein, transcript variant 2, mRNA
89863	CATCAAAGGCATCTTCTTCCC	21	3	NM_133645	-	396	416	1	21	19	4A9T6	2	mitochondrial translation optimization 1 homolog (S. cerevisiae) (MTO1), nuclear gene encoding mitochondrial protein, transcript variant 1, mRNA
89863	CATCAAAGGCATCTTCTTCCC	21	3	NM_001123226	-	396	416	1	21	19	4A9T6	2	mitochondrial translation optimization 1 homolog (S. cerevisiae) (MTO1), nuclear gene encoding mitochondrial protein, transcript variant 3, mRNA
90975	TTTCCTTTTGCAGATATCTTC	21	3	NM_003031	+	1819	1838	1	20	19	9G10	2	seven in absentia homolog 1 (Drosophila) (SIAH1), transcript variant 1, mRNA
90975	TTTCCTTTTGCAGATATCTTC	21	3	NM_001006610	+	2191	2210	1	20	19	9G10	2	seven in absentia homolog 1 (Drosophila) (SIAH1), transcript variant 2, mRNA
91385	CTGTCAGGTCCATGAGCTATC	21	3	NM_207122	+	3064	3083	1	20	19	7G12	2	exostosin 2 (EXT2), transcript variant 2, mRNA
91385	CTGTCAGGTCCATGAGCTATC	21	3	NM_001178083	+	3094	3113	1	20	19	7G12	2	exostosin 2 (EXT2), transcript variant 3, mRNA
91385	CTGTCAGGTCCATGAGCTATC	21	3	NM_000401	+	2885	2904	1	20	19	7G12	2	exostosin 2 (EXT2), transcript variant 1, mRNA
91562	CTTTCCTTTGGATGTATCCAT	21	3	NM_001193630	-	352	372	1	21	19	5C9A5	2	zinc finger protein 705D-like (LOC100132396), mRNA
91605	CTTGCTGCTTCCTCCTGCATC	21	3	NM_014727	-	691	709	1	19	19	19	2	myeloid/lymphoid or mixed-lineage leukemia 4 (MLL4), mRNA
92955	TTTCCATTTCGTTAGCTTTCTT	22	3	NM_018279	+	660	680	1	21	20	3C17	2	transmembrane protein 19 (TMEM19), mRNA
93248	ATAGAAGCCTTTGGAAACTTA	21	3	NM_002522	+	4909	4929	1	21	19	6G9A4	2	neuronal pentraxin I (NPTX1), mRNA
94347	GTCTTCTTCTTCATCAAACTC	21	3	NR_034169	+	411	430	2	21	19	16A3	2	family with sequence similarity 133, member A pseudogene (LOC728066), non-coding RNA
94347	GTCTTCTTCTTCATCAAACTC	21	3	NM_152789	+	417	436	2	21	19	16A3	2	family with sequence similarity 133, member B (FAM133B), transcript variant 1, mRNA
94347	GTCTTCTTCTTCATCAAACTC	21	3	NM_001068	-	4819	4838	2	21	19	15A4	2	topoisomerase (DNA) II beta 180kDa (TOP2B), mRNA
94347	GTCTTCTTCTTCATCAAACTC	21	3	NM_001040057	+	516	535	2	21	19	16A3	2	family with sequence similarity 133, member B (FAM133B), transcript variant 2, mRNA
94347	GTCTTCTTCTTCATCAAACTC	21	3	NM_006401	-	914	933	2	21	19	2T17	2	acidic (leucine-rich) nuclear phosphoprotein 32 family, member B (ANP32B), mRNA
94649	GTAGATAGAGAGCAAGCATCTA	22	3	NM_170692	+	5007	5028	1	22	20	4A6G10	2	RAS protein activator like 2 (RASAL2), transcript variant 2, mRNA
94649	GTAGATAGAGAGCAAGCATCTA	22	3	NM_004841	+	3945	3966	1	22	20	4A6G10	2	RAS protein activator like 2 (RASAL2), transcript variant 1, mRNA
94754	GCAAGGACGACCATAAGAGAG	21	3	NM_001080519	+	4301	4321	1	21	19	5G8A6	2	BAH domain and coiled-coil containing 1 (BAHCC1), mRNA
95076	TCCTGATATATAGCCAAGACA	21	3	NM_001792	+	764	784	1	21	19	11AG8	2	cadherin 2, type 1, N-cadherin (neuronal) (CDH2), mRNA
95762	AGAGATTGTGGATGATGATAT	21	3	NM_080588	-	304	323	1	20	19	15T4	2	protein tyrosine phosphatase, non-receptor type 7 (PTPN7), transcript variant 2, mRNA
95982	TCTTCCACTGTGAAAATGACTT	22	3	NM_001042749	-	4239	4260	1	22	20	9GT11	2	stromal antigen 2 (STAG2), transcript variant 1, mRNA
95982	TCTTCCACTGTGAAAATGACTT	22	3	NM_001042750	-	4148	4169	1	22	20	9GT11	2	stromal antigen 2 (STAG2), transcript variant 2, mRNA
95982	TCTTCCACTGTGAAAATGACTT	22	3	NM_001042751	-	4037	4058	1	22	20	9GT11	2	stromal antigen 2 (STAG2), transcript variant 3, mRNA
95982	TCTTCCACTGTGAAAATGACTT	22	3	NM_006603	-	3972	3993	1	22	20	9GT11	2	stromal antigen 2 (STAG2), transcript variant 4, mRNA
96538	TTCTTAATCAAACCTCACTTA	21	3	NM_021224	+	7824	7843	1	20	19	15C4	2	zinc finger protein 462 (ZNF462), mRNA
97600	GTTTGCTTTCTGTGTGTTGTG	21	3	NM_177556	+	2246	2265	1	20	19	16T3	2	trophinin (TRO), transcript variant 2, mRNA
97600	GTTTGCTTTCTGTGTGTTGTG	21	3	NM_016157	+	2261	2280	1	20	19	16T3	2	trophinin (TRO), transcript variant 3, mRNA
97600	GTTTGCTTTCTGTGTGTTGTG	21	3	NM_001039705	+	4582	4601	1	20	19	16T3	2	trophinin (TRO), transcript variant 6, mRNA
97883	CTCCCTTTGTCCCCACAGAAA	21	3	NM_001039567	-	482	501	2	21	19	17A2	2	ribosomal protein S4, Y-linked 2 (RPS4Y2), mRNA
98396	TTGTGCAACAACAGGGATACA	21	3	NM_207517	-	4271	4291	1	21	19	2G15A2	2	ADAMTS-like 3 (ADAMTSL3), mRNA
98626	CTCTCTTATGGTCGTCCTTGC	21	3	NM_001080519	-	4301	4321	1	21	19	6T8C5	2	BAH domain and coiled-coil containing 1 (BAHCC1), mRNA
98761	TTTGACACATACAGAGAAAGT	21	3	NM_004232	-	5639	5659	1	21	19	5C9G5	2	suppressor of cytokine signaling 6 (SOCS6), mRNA
100016	CAGTTCCTATCATGACAGATG	21	3	NM_024611	+	1506	1526	1	21	19	4T4T11	2	NMDA receptor regulated 2 (NARG2), transcript variant 1, mRNA
100016	CAGTTCCTATCATGACAGATG	21	3	NM_001018089	+	1346	1366	1	21	19	4T4T11	2	NMDA receptor regulated 2 (NARG2), transcript variant 2, mRNA
100227	CTTTGTCCAAGAATACATGAC	21	3	NM_006984	-	659	679	1	21	19	8A4T7	2	claudin 10 (CLDN10), transcript variant b, mRNA
100227	CTTTGTCCAAGAATACATGAC	21	3	NM_001160100	-	770	790	1	21	19	8A4T7	2	claudin 10 (CLDN10), transcript variant a_v1, mRNA
100227	CTTTGTCCAAGAATACATGAC	21	3	NM_182848	-	827	847	1	21	19	8A4T7	2	claudin 10 (CLDN10), transcript variant a, mRNA
101683	CCTAATATAGACAACGGCTCT	21	3	NM_001167672	-	16055	16075	1	21	19	7T4A8	2	LIM domain containing preferred translocation partner in lipoma (LPP), transcript variant 3, mRNA
101683	CCTAATATAGACAACGGCTCT	21	3	NM_005578	-	16586	16606	1	21	19	7T4A8	2	LIM domain containing preferred translocation partner in lipoma (LPP), transcript variant 1, mRNA
101683	CCTAATATAGACAACGGCTCT	21	3	NM_001167671	-	16529	16549	1	21	19	7T4A8	2	LIM domain containing preferred translocation partner in lipoma (LPP), transcript variant 2, mRNA
101871	CCTGAAGAATGCCTCTGCTTC	21	3	NM_014160	+	791	811	1	21	19	4A4T11	2	makorin ring finger protein 2 (MKRN2), mRNA
102926	CTGTGGATGAGGAAGAGCTGA	21	3	NM_001005237	-	303	322	2	21	19	9G10	2	olfactory receptor, family 51, subfamily G, member 1 (OR51G1), mRNA
104015	AAAATACAAAGACCTCGGGAT	21	3	NM_014023	-	3013	3033	1	21	19	4T10C5	2	WD repeat domain 37 (WDR37), mRNA
104740	GTTGAACTGAGCTAATTGAGA	21	3	NM_014877	-	5472	5492	1	21	19	14AT5	2	helicase with zinc finger (HELZ), mRNA
105064	TCCATTTCTCAGTCTGAAACC	21	3	NM_003805	-	89	109	1	21	19	10A5A4	2	CASP2 and RIPK1 domain containing adaptor with death domain (CRADD), mRNA
105326	AAGATAATGTAGAAAGTGCTCT	22	3	NM_004063	+	2572	2592	1	21	20	10A10	2	cadherin 17, LI cadherin (liver-intestine) (CDH17), transcript variant 1, mRNA
105326	AAGATAATGTAGAAAGTGCTCT	22	3	NM_001144663	+	2573	2593	1	21	20	10A10	2	cadherin 17, LI cadherin (liver-intestine) (CDH17), transcript variant 2, mRNA
106799	ATGAATGAAGATCAGGTGAAG	21	3	NM_173516	+	535	555	1	21	19	11T4T4	2	poly(A)-specific ribonuclease (PARN)-like domain containing 1 (PNLDC1), mRNA
107115	TTCAAGTATAGACATGTCTTCT	22	3	NM_001127357	-	1446	1467	1	22	20	8T10T2	2	putative homeodomain transcription factor 2 (PHTF2), transcript variant 1, mRNA
107115	TTCAAGTATAGACATGTCTTCT	22	3	NM_020432	-	1434	1455	1	22	20	8T10T2	2	putative homeodomain transcription factor 2 (PHTF2), transcript variant 2, mRNA
107115	TTCAAGTATAGACATGTCTTCT	22	3	NM_001127358	-	1523	1544	1	22	20	8T10T2	2	putative homeodomain transcription factor 2 (PHTF2), transcript variant 3, mRNA
107672	AGAAAAAACATTGTATGGAAG	21	3	NM_019844	-	941	961	1	21	19	8C2T9	2	solute carrier organic anion transporter family, member 1B3 (SLCO1B3), mRNA
108030	TTTGAGCAAAAATACCTAGAAA	22	3	NM_022173	-	2493	2514	1	22	20	10AA10	2	TIA1 cytotoxic granule-associated RNA binding protein (TIA1), transcript variant 2, mRNA
108030	TTTGAGCAAAAATACCTAGAAA	22	3	NM_022037	-	2460	2481	1	22	20	10AA10	2	TIA1 cytotoxic granule-associated RNA binding protein (TIA1), transcript variant 1, mRNA
108499	ATTTCATCAAAAGATAACTGA	21	3	NM_022111	-	7832	7852	1	21	19	7C4G8	2	claspin (CLSPN), transcript variant 1, mRNA
108499	ATTTCATCAAAAGATAACTGA	21	3	NM_001190481	-	7640	7660	1	21	19	7C4G8	2	claspin (CLSPN), transcript variant 2, mRNA
108727	CCTGAAATTGTAGTTATCTCT	21	3	NM_015447	+	7564	7584	1	21	19	15A2T2	2	calmodulin regulated spectrin-associated protein 1 (CAMSAP1), mRNA
108727	CCTGAAATTGTAGTTATCTCT	21	3	NM_017759	+	10794	10814	1	21	19	6A8A5	2	INO80 complex subunit D (INO80D), mRNA
108916	CCTTTCTTTTATTTCTTCTTTT	22	3	NM_002792	-	834	854	2	22	20	9A11	2	proteasome (prosome, macropain) subunit, alpha type, 7 (PSMA7), mRNA
110635	TTTTTTGATTTTTGTTTGATT	21	3	NM_022900	+	3623	3642	2	21	19	6A13	2	CAS1 domain containing 1 (CASD1), mRNA
110831	ATAGATATCTGCCACATTGGTT	22	3	NM_007223	-	1406	1427	1	22	20	6A2T12	2	G protein-coupled receptor 176 (GPR176), mRNA
111987	TTTTTGATTTTTGTTTGATTTT	22	3	NM_015065	+	7071	7092	1	22	20	6A10A4	2	exophilin 5 (EXPH5), mRNA
111987	TTTTTGATTTTTGTTTGATTTT	22	3	NM_015578	+	1709	1730	1	22	20	6A10A4	2	LSM14A, SCD6 homolog A (S. cerevisiae) (LSM14A), transcript variant 2, mRNA
111987	TTTTTGATTTTTGTTTGATTTT	22	3	NM_001114093	+	1766	1787	1	22	20	6A10A4	2	LSM14A, SCD6 homolog A (S. cerevisiae) (LSM14A), transcript variant 1, mRNA
111987	TTTTTGATTTTTGTTTGATTTT	22	3	NM_174909	+	1792	1813	1	22	20	6A4T10	2	transmembrane protein 167A (TMEM167A), mRNA
112295	AGATCTAGCTCTAATAGCCCT	21	3	NM_012395	-	3585	3605	1	21	19	4C2G13	2	cyclin-dependent kinase 14 (CDK14), mRNA
112785	ATGCCAGGACTGAAACCAAAA	21	3	NM_173576	+	1652	1672	1	21	19	2G15A2	2	mohawk homeobox (MKX), transcript variant 1, mRNA
112785	ATGCCAGGACTGAAACCAAAA	21	3	NM_001242702	+	1649	1669	1	21	19	2G15A2	2	mohawk homeobox (MKX), transcript variant 2, mRNA
113332	TTGTCTGAGGCTGCTTGTCAC	21	3	NM_002379	+	1518	1538	1	21	19	6G7T6	2	matrilin 1, cartilage matrix protein (MATN1), mRNA
113444	AAATATGTCTGGTCTAAAACT	21	3	NM_017818	+	1634	1654	1	21	19	8C4C7	2	WD repeat containing, antisense to TP73 (WRAP73), mRNA
113657	CTTGGTGTTTTGCAATTAATG	21	3	NM_022136	-	678	697	2	21	19	14T5	2	SAM domain, SH3 domain and nuclear localization signals 1 (SAMSN1), transcript variant 1, mRNA
113657	CTTGGTGTTTTGCAATTAATG	21	3	NM_001256370	-	958	977	2	21	19	14T5	2	SAM domain, SH3 domain and nuclear localization signals 1 (SAMSN1), transcript variant 2, mRNA
113657	CTTGGTGTTTTGCAATTAATG	21	3	NM_001002257	-	4723	4743	1	21	19	14AT5	2	lysocardiolipin acyltransferase 1 (LCLAT1), transcript variant 2, mRNA
113657	CTTGGTGTTTTGCAATTAATG	21	3	NM_182551	-	4928	4948	1	21	19	14AT5	2	lysocardiolipin acyltransferase 1 (LCLAT1), transcript variant 1, mRNA
114672	TCCTGATTCGTCTTGTTCTTC	21	3	NM_024949	-	2814	2834	1	21	19	9G4G6	2	WW and C2 domain containing 2 (WWC2), mRNA
115134	TTGAATCAGAATACAACTGGGT	22	3	NM_198459	+	663	683	2	22	20	11A9	2	DENN/MADD domain containing 2C (DENND2C), transcript variant 2, mRNA
115134	TTGAATCAGAATACAACTGGGT	22	3	NM_001256404	+	1032	1052	2	22	20	11A9	2	DENN/MADD domain containing 2C (DENND2C), transcript variant 1, mRNA
116324	TTTCTTCACCTGATCTTCATTC	22	3	NM_173516	-	537	558	1	22	20	7A4A9	2	poly(A)-specific ribonuclease (PARN)-like domain containing 1 (PNLDC1), mRNA
116971	TCTTCATTTCAGAAAGCCTGAC	22	3	NM_004363	+	2247	2268	1	22	20	12A3C5	2	carcinoembryonic antigen-related cell adhesion molecule 5 (CEACAM5), mRNA
117211	AATGAAGGTTATTAAGCAAAG	21	3	NM_000857	+	657	676	2	21	19	12A7	2	guanylate cyclase 1, soluble, beta 3 (GUCY1B3), mRNA
117779	ATTCAACTTCAAGACTTTTTG	21	3	NM_014139	+	4792	4810	1	19	19	19	2	sodium channel, voltage-gated, type XI, alpha subunit (SCN11A), mRNA
117973	CCTCAAGCCTGTGTTCAGCCA	21	3	NM_198686	+	2833	2853	1	21	19	7C4G8	2	RAB15, member RAS onocogene family (RAB15), mRNA
118592	TTGACAGGAAATTTGCAAGCT	21	3	NM_002481	+	5957	5976	2	21	19	5G14	2	protein phosphatase 1, regulatory subunit 12B (PPP1R12B), transcript variant 1, mRNA
118592	TTGACAGGAAATTTGCAAGCT	21	3	NM_032103	+	4312	4331	2	21	19	5G14	2	protein phosphatase 1, regulatory subunit 12B (PPP1R12B), transcript variant 3, mRNA
118592	TTGACAGGAAATTTGCAAGCT	21	3	NM_032104	+	4493	4512	2	21	19	5G14	2	protein phosphatase 1, regulatory subunit 12B (PPP1R12B), transcript variant 4, mRNA
118592	TTGACAGGAAATTTGCAAGCT	21	3	NM_001197131	+	3445	3464	2	21	19	5G14	2	protein phosphatase 1, regulatory subunit 12B (PPP1R12B), transcript variant 7, mRNA
119327	AGACAGCTTTAAACATTTCTG	21	3	NR_027055	-	1580	1599	1	20	19	6C13	2	family with sequence similarity 41, member C (FAM41C), non-coding RNA
119583	TTCCACTGATTCTCATTTCAA	21	2	NM_014331	-	3056	3075	2	21	19	5T14	2	solute carrier family 7 (anionic amino acid transporter light chain, xc- system), member 11 (SLC7A11), mRNA
119583	TTCCACTGATTCTCATTTCAA	21	2	NM_014500	-	738	758	1	21	19	6T7A6	2	HIV-1 Tat specific factor 1 (HTATSF1), transcript variant 2, mRNA
119583	TTCCACTGATTCTCATTTCAA	21	2	NM_001163280	-	987	1007	1	21	19	6T7A6	2	HIV-1 Tat specific factor 1 (HTATSF1), transcript variant 1, mRNA
123810	CCTATTCTGAAGATATTGAAA	21	2	NM_001127510	+	3147	3167	1	21	19	14AT5	2	adenomatous polyposis coli (APC), transcript variant 2, mRNA
123810	CCTATTCTGAAGATATTGAAA	21	2	NM_000038	+	3039	3059	1	21	19	14AT5	2	adenomatous polyposis coli (APC), transcript variant 3, mRNA
123810	CCTATTCTGAAGATATTGAAA	21	2	NM_001127511	+	3113	3133	1	21	19	14AT5	2	adenomatous polyposis coli (APC), transcript variant 1, mRNA
124678	TTCACTGTATCTTGTAGAAAA	21	2	NM_001135805	+	4604	4623	1	20	19	3A16	2	synaptotagmin I (SYT1), transcript variant 2, mRNA
124678	TTCACTGTATCTTGTAGAAAA	21	2	NM_001135806	+	4190	4209	1	20	19	3A16	2	synaptotagmin I (SYT1), transcript variant 3, mRNA
124678	TTCACTGTATCTTGTAGAAAA	21	2	NM_005639	+	4590	4609	1	20	19	3A16	2	synaptotagmin I (SYT1), transcript variant 1, mRNA
125944	TTGATGGCACACAGTATCCTC	21	2	NM_152879	-	3600	3620	1	21	19	6G7T6	2	diacylglycerol kinase, delta 130kDa (DGKD), transcript variant 2, mRNA
125944	TTGATGGCACACAGTATCCTC	21	2	NM_003648	-	3535	3555	1	21	19	6G7T6	2	diacylglycerol kinase, delta 130kDa (DGKD), transcript variant 1, mRNA
126835	TAACTCTCAGGCTTTTGTAAA	21	2	NM_052872	-	191	210	2	21	19	16T3	2	interleukin 17F (IL17F), mRNA
127738	TTAATGTGATGATTTGTAAGA	21	2	NM_001080546	+	1442	1462	1	21	19	10G5T4	2	transmembrane protein 218 (TMEM218), mRNA
128078	TTCAAAAGTTCTTCAAGGGTT	21	2	NM_024894	-	1973	1993	1	21	19	6A1T12	2	nucleolar protein 10 (NOL10), mRNA
128564	TTAAAGAAGTCATAAGCCTGTT	22	2	NM_032321	-	1987	2008	1	22	20	7A11G2	2	chromosome 2 open reading frame 88 (C2orf88), transcript variant 4, mRNA
128564	TTAAAGAAGTCATAAGCCTGTT	22	2	NM_001042519	-	2060	2081	1	22	20	7A11G2	2	chromosome 2 open reading frame 88 (C2orf88), transcript variant 1, mRNA
128564	TTAAAGAAGTCATAAGCCTGTT	22	2	NM_001042520	-	2016	2037	1	22	20	7A11G2	2	chromosome 2 open reading frame 88 (C2orf88), transcript variant 3, mRNA
128564	TTAAAGAAGTCATAAGCCTGTT	22	2	NM_001042521	-	2028	2049	1	22	20	7A11G2	2	chromosome 2 open reading frame 88 (C2orf88), transcript variant 2, mRNA
129246	ACAATTGCCCTGAGTTCTGTC	21	2	NM_183378	+	940	960	1	21	19	4TT15	2	ovochymase 1 (OVCH1), mRNA
129649	CTTTTCTTCATATTCAGCAGC	21	2	NM_001130528	-	1204	1223	1	20	19	11A8	2	sperm associated antigen 9 (SPAG9), transcript variant 1, mRNA
129649	CTTTTCTTCATATTCAGCAGC	21	2	NM_003971	-	1162	1181	1	20	19	11A8	2	sperm associated antigen 9 (SPAG9), transcript variant 3, mRNA
129649	CTTTTCTTCATATTCAGCAGC	21	2	NM_001251971	-	832	851	1	20	19	11A8	2	sperm associated antigen 9 (SPAG9), transcript variant 4, mRNA
129649	CTTTTCTTCATATTCAGCAGC	21	2	NM_001130527	-	1162	1181	1	20	19	11A8	2	sperm associated antigen 9 (SPAG9), transcript variant 2, mRNA
130757	GAAGATCAAGAATGCCAACAAG	22	2	NM_001770	-	981	1002	1	22	20	6C9A5	2	CD19 molecule (CD19), transcript variant 2, mRNA
130757	GAAGATCAAGAATGCCAACAAG	22	2	NM_001178098	-	981	1002	1	22	20	6C9A5	2	CD19 molecule (CD19), transcript variant 1, mRNA
132196	TGAAGAACAAGACGAATCAGG	21	2	NM_004996	+	1629	1649	1	21	19	6A7A6	2	ATP-binding cassette, sub-family C (CFTR/MRP), member 1 (ABCC1), transcript variant 1, mRNA
132196	TGAAGAACAAGACGAATCAGG	21	2	NM_019900	+	1629	1649	1	21	19	6A7A6	2	ATP-binding cassette, sub-family C (CFTR/MRP), member 1 (ABCC1), transcript variant 5, mRNA
132196	TGAAGAACAAGACGAATCAGG	21	2	NM_019862	+	1629	1649	1	21	19	6A7A6	2	ATP-binding cassette, sub-family C (CFTR/MRP), member 1 (ABCC1), transcript variant 2, mRNA
132196	TGAAGAACAAGACGAATCAGG	21	2	NM_019899	+	1629	1649	1	21	19	6A7A6	2	ATP-binding cassette, sub-family C (CFTR/MRP), member 1 (ABCC1), transcript variant 4, mRNA
132196	TGAAGAACAAGACGAATCAGG	21	2	NM_019898	+	1629	1649	1	21	19	6A7A6	2	ATP-binding cassette, sub-family C (CFTR/MRP), member 1 (ABCC1), transcript variant 3, mRNA
133255	TCATGTCCAAAGCTAAAAATG	21	2	NM_005441	-	2003	2023	1	21	19	8A3C8	2	chromatin assembly factor 1, subunit B (p60) (CHAF1B), mRNA
134098	CCATTTCTCAGTCTGAAACCAC	22	2	NM_003805	-	87	108	1	22	20	9A5A6	2	CASP2 and RIPK1 domain containing adaptor with death domain (CRADD), mRNA
138169	CAGAAAACAATACATGATGAC	21	2	NM_003647	+	658	677	1	20	19	9A10	2	diacylglycerol kinase, epsilon 64kDa (DGKE), mRNA
138169	CAGAAAACAATACATGATGAC	21	2	NM_206883	-	620	639	2	21	19	17G2	2	solute carrier family 26, member 5 (prestin) (SLC26A5), transcript variant b, mRNA
138169	CAGAAAACAATACATGATGAC	21	2	NM_206884	-	620	639	2	21	19	17G2	2	solute carrier family 26, member 5 (prestin) (SLC26A5), transcript variant c, mRNA
138169	CAGAAAACAATACATGATGAC	21	2	NM_206885	-	620	639	2	21	19	17G2	2	solute carrier family 26, member 5 (prestin) (SLC26A5), transcript variant d, mRNA
138169	CAGAAAACAATACATGATGAC	21	2	NM_198999	-	620	639	2	21	19	17G2	2	solute carrier family 26, member 5 (prestin) (SLC26A5), transcript variant a, mRNA
138169	CAGAAAACAATACATGATGAC	21	2	NM_001167962	-	620	639	2	21	19	17G2	2	solute carrier family 26, member 5 (prestin) (SLC26A5), transcript variant e, mRNA
139518	AATTGCTGCATTGTTTTAACT	21	2	NM_152731	-	2127	2146	1	20	19	5C14	2	BEN domain containing 6 (BEND6), mRNA
140021	CCTTCTTCCTCTTCTTCAACT	21	2	NM_001008779	-	414	433	2	21	19	7C12	2	speedy homolog A (Xenopus laevis) (SPDYA), transcript variant 2, mRNA
140021	CCTTCTTCCTCTTCTTCAACT	21	2	NM_001142634	-	528	547	2	21	19	7C12	2	speedy homolog A (Xenopus laevis) (SPDYA), transcript variant 3, mRNA
140021	CCTTCTTCCTCTTCTTCAACT	21	2	NM_182756	-	602	621	2	21	19	7C12	2	speedy homolog A (Xenopus laevis) (SPDYA), transcript variant 1, mRNA
140252	TTTTGTCTCCTGCTCAGCTCCA	22	2	NM_138456	+	392	413	1	22	20	2T2T16	2	basic leucine zipper transcription factor, ATF-like 2 (BATF2), mRNA
140643	CAGAACTTGCTTAAAAGCAGC	21	2	NM_001008224	-	128	148	1	21	19	9C4A6	2	uveal autoantigen with coiled-coil domains and ankyrin repeats (UACA), transcript variant 2, mRNA
141773	TTATAATTTAACTTACAGCTG	21	2	NM_022353	+	916	936	1	21	19	4A5A10	2	O-sialoglycoprotein endopeptidase-like 1 (OSGEPL1), mRNA
141962	TCACTGATGCAGATAAGGAAG	21	2	NM_001101404	-	216	236	1	21	19	7T2A10	2	SH2 domain containing 7 (SH2D7), mRNA
142667	GCTTTGGATAGGAGCTGTTGT	21	2	NM_001256486	-	8575	8593	2	20	19	19	2	golgin B1 (GOLGB1), transcript variant 1, mRNA
142667	GCTTTGGATAGGAGCTGTTGT	21	2	NM_004487	-	8560	8578	2	20	19	19	2	golgin B1 (GOLGB1), transcript variant 2, mRNA
142667	GCTTTGGATAGGAGCTGTTGT	21	2	NM_001256487	-	8603	8621	2	20	19	19	2	golgin B1 (GOLGB1), transcript variant 3, mRNA
142667	GCTTTGGATAGGAGCTGTTGT	21	2	NM_001256488	-	8480	8498	2	20	19	19	2	golgin B1 (GOLGB1), transcript variant 4, mRNA
144435	TTAATTTCAAGATGTCTGGAT	21	2	NM_018042	-	977	997	1	21	19	10G4C5	2	schlafen family member 12 (SLFN12), mRNA
144790	ATAGAAAGTATCTTTGGCACT	21	2	NM_020919	-	3453	3472	2	21	19	10C9	2	amyotrophic lateral sclerosis 2 (juvenile) (ALS2), transcript variant 1, mRNA
145324	AGGAAAACAATCTGTGGTTGT	21	2	NM_207014	+	1061	1080	1	20	19	2G17	2	WD repeat domain 78 (WDR78), transcript variant 2, mRNA
145324	AGGAAAACAATCTGTGGTTGT	21	2	NM_024763	+	1061	1080	1	20	19	2G17	2	WD repeat domain 78 (WDR78), transcript variant 1, mRNA
145671	GGACAGAGCAGACTTGGCTGA	21	2	NM_002027	+	249	269	1	21	19	12C1T6	2	farnesyltransferase, CAAX box, alpha (FNTA), transcript variant 1, mRNA
147891	TGAAGATCAAGAATGCCAACAA	22	2	NM_001770	-	982	1003	1	22	20	7C9A4	2	CD19 molecule (CD19), transcript variant 2, mRNA
147891	TGAAGATCAAGAATGCCAACAA	22	2	NM_001178098	-	982	1003	1	22	20	7C9A4	2	CD19 molecule (CD19), transcript variant 1, mRNA
148351	AGTGGAGCTGAGCAGGAGACA	21	2	NM_001003941	+	112	131	2	21	19	12A7	2	oxoglutarate (alpha-ketoglutarate) dehydrogenase (lipoamide) (OGDH), nuclear gene encoding mitochondrial protein, transcript variant 2, mRNA
148351	AGTGGAGCTGAGCAGGAGACA	21	2	NM_002541	+	112	131	2	21	19	12A7	2	oxoglutarate (alpha-ketoglutarate) dehydrogenase (lipoamide) (OGDH), nuclear gene encoding mitochondrial protein, transcript variant 1, mRNA
148351	AGTGGAGCTGAGCAGGAGACA	21	2	NM_001165036	+	112	131	2	21	19	12A7	2	oxoglutarate (alpha-ketoglutarate) dehydrogenase (lipoamide) (OGDH), nuclear gene encoding mitochondrial protein, transcript variant 3, mRNA
148351	AGTGGAGCTGAGCAGGAGACA	21	2	NM_014693	+	894	914	1	21	19	4G10G5	2	endothelin converting enzyme 2 (ECE2), transcript variant 1, mRNA
148351	AGTGGAGCTGAGCAGGAGACA	21	2	NM_001037324	+	558	578	1	21	19	4G10G5	2	endothelin converting enzyme 2 (ECE2), transcript variant 2, mRNA
148351	AGTGGAGCTGAGCAGGAGACA	21	2	NM_001100120	+	783	803	1	21	19	4G10G5	2	endothelin converting enzyme 2 (ECE2), transcript variant 4, mRNA
148351	AGTGGAGCTGAGCAGGAGACA	21	2	NM_001100121	+	645	665	1	21	19	4G10G5	2	endothelin converting enzyme 2 (ECE2), transcript variant 5, mRNA
148663	TCAGCAAAAATAGGGATGGTT	21	2	NM_001777	+	2015	2035	1	21	19	13GG6	2	CD47 molecule (CD47), transcript variant 1, mRNA
148663	TCAGCAAAAATAGGGATGGTT	21	2	NM_198793	+	1957	1977	1	21	19	13GG6	2	CD47 molecule (CD47), transcript variant 2, mRNA
149631	TAGAAGTTGTTATATGCTTTG	21	2	NM_001076675	-	2187	2206	2	21	19	4G15	2	zinc finger protein 626 (ZNF626), transcript variant 1, mRNA
149707	TTGATGCTGCAGCTACAGACC	21	2	NM_003170	+	3998	4018	1	21	19	9C4A6	2	suppressor of Ty 6 homolog (S. cerevisiae) (SUPT6H), mRNA
149968	AGAGCTGATCTCCAGGCACCT	21	2	NM_152279	-	5394	5413	1	20	19	4C15	2	zinc finger protein 585B (ZNF585B), mRNA
151207	CATTTTATTTATCTATTGCTT	21	2	NM_012275	-	2663	2682	1	20	19	3T16	2	interleukin 36 receptor antagonist (IL36RN), transcript variant 1, mRNA
151207	CATTTTATTTATCTATTGCTT	21	2	NM_173170	-	2635	2654	1	20	19	3T16	2	interleukin 36 receptor antagonist (IL36RN), transcript variant 2, mRNA
151625	TTTGTTTCATCTCCTGCAACT	21	2	NM_002947	+	164	183	1	20	19	4T15	2	replication protein A3, 14kDa (RPA3), mRNA
152211	AATCCATCATAGTTGGCCAGG	21	2	NR_027481	+	1656	1676	1	21	19	9T3T7	2	zinc finger protein 876, pseudogene (ZNF876P), non-coding RNA
153882	ATACAGATTCCAGTTTGCCTTG	22	2	NM_002813	+	2079	2100	1	22	20	8T4T8	2	proteasome (prosome, macropain) 26S subunit, non-ATPase, 9 (PSMD9), mRNA
156255	GGGGCGCAAATAGAAGAGAAT	21	2	NM_003253	+	5968	5988	1	21	19	5G8A6	2	T-cell lymphoma invasion and metastasis 1 (TIAM1), mRNA
156410	CTTCATTCATTTCAAATGCTTT	22	2	NM_145023	-	502	523	1	22	20	2T14G4	2	coiled-coil domain containing 7 (CCDC7), transcript variant 1, mRNA
158160	TATATGGAATATAAGAATGTC	21	2	NM_000092	-	6998	7017	2	21	19	5G14	2	collagen, type IV, alpha 4 (COL4A4), mRNA
158182	CTTGCAATGAAATTGAATGGGC	22	2	NM_001817	+	1082	1103	1	22	20	7T4T9	2	carcinoembryonic antigen-related cell adhesion molecule 4 (CEACAM4), mRNA
158551	TAATTCGATTAATGTAGGAGA	21	2	NM_198578	+	2845	2865	1	21	19	6G4A9	2	leucine-rich repeat kinase 2 (LRRK2), mRNA
160403	GAAGAACAAGACGAATCAGGA	21	2	NM_024949	+	2814	2834	1	21	19	6C4C9	2	WW and C2 domain containing 2 (WWC2), mRNA
161039	AAAAACTGATAAGACATGACA	21	2	NM_012258	-	1299	1319	1	21	19	8A3G8	2	hairy/enhancer-of-split related with YRPW motif 1 (HEY1), transcript variant 1, mRNA
161039	AAAAACTGATAAGACATGACA	21	2	NM_001040708	-	1311	1331	1	21	19	8A3G8	2	hairy/enhancer-of-split related with YRPW motif 1 (HEY1), transcript variant 2, mRNA
161643	ATCACAGTTCTGATAGTTTTG	21	2	NM_019894	-	2856	2875	2	21	19	13A6	2	transmembrane protease, serine 4 (TMPRSS4), transcript variant 1, mRNA
161643	ATCACAGTTCTGATAGTTTTG	21	2	NM_001083947	-	2841	2860	2	21	19	13A6	2	transmembrane protease, serine 4 (TMPRSS4), transcript variant 3, mRNA
161643	ATCACAGTTCTGATAGTTTTG	21	2	NM_001173551	-	2850	2869	2	21	19	13A6	2	transmembrane protease, serine 4 (TMPRSS4), transcript variant 4, mRNA
161643	ATCACAGTTCTGATAGTTTTG	21	2	NM_001173552	-	2736	2755	2	21	19	13A6	2	transmembrane protease, serine 4 (TMPRSS4), transcript variant 5, mRNA
164819	ATGACCACAGACAACAAAATG	21	2	NM_000171	+	702	722	1	21	19	2G15A2	2	glycine receptor, alpha 1 (GLRA1), transcript variant 2, mRNA
164819	ATGACCACAGACAACAAAATG	21	2	NM_001146040	+	702	722	1	21	19	2G15A2	2	glycine receptor, alpha 1 (GLRA1), transcript variant 1, mRNA
165025	AAAGATTGGTCTGACAAAGCT	21	2	NM_001135000	+	352	372	1	21	19	15A1A3	2	fermitin family member 2 (FERMT2), transcript variant 3, mRNA
165025	AAAGATTGGTCTGACAAAGCT	21	2	NM_006832	+	352	372	1	21	19	15A1A3	2	fermitin family member 2 (FERMT2), transcript variant 1, mRNA
165025	AAAGATTGGTCTGACAAAGCT	21	2	NM_001134999	+	352	372	1	21	19	15A1A3	2	fermitin family member 2 (FERMT2), transcript variant 2, mRNA
166458	CTATCTTGATGAAAATGGGTT	21	2	NM_001105659	+	498	518	1	21	19	7G4A8	2	leucine-rich repeats and IQ motif containing 3 (LRRIQ3), mRNA
169638	TATTCAAGTCTGTTATCCCTCC	22	2	NR_004405	+	1216	1237	1	22	20	2T3A15	2	laminin, beta 2 pseudogene 1 (LAMB2P1), non-coding RNA
171426	AGATGAGTTTGATGAAGAAGA	21	2	NM_017637	+	2091	2110	2	21	19	14A5	2	basonuclin 2 (BNC2), mRNA
171426	AGATGAGTTTGATGAAGAAGA	21	2	NM_014396	+	74	94	1	21	19	8T3T8	2	vacuolar protein sorting 41 homolog (S. cerevisiae) (VPS41), transcript variant 1, mRNA
171426	AGATGAGTTTGATGAAGAAGA	21	2	NM_080631	+	74	94	1	21	19	8T3T8	2	vacuolar protein sorting 41 homolog (S. cerevisiae) (VPS41), transcript variant 2, mRNA
171426	AGATGAGTTTGATGAAGAAGA	21	2	NM_015695	+	1570	1590	1	21	19	12T1A6	2	bromodomain and PHD finger containing, 3 (BRPF3), mRNA
171536	GAGGAAGCAGCAAGAAAGATG	21	2	NM_012224	+	1734	1752	1	19	19	19	2	NIMA (never in mitosis gene a)-related kinase 1 (NEK1), transcript variant 2, mRNA
171536	GAGGAAGCAGCAAGAAAGATG	21	2	NM_001199397	+	1656	1674	1	19	19	19	2	NIMA (never in mitosis gene a)-related kinase 1 (NEK1), transcript variant 1, mRNA
171536	GAGGAAGCAGCAAGAAAGATG	21	2	NM_001199398	+	1656	1674	1	19	19	19	2	NIMA (never in mitosis gene a)-related kinase 1 (NEK1), transcript variant 3, mRNA
171536	GAGGAAGCAGCAAGAAAGATG	21	2	NM_001199399	+	1656	1674	1	19	19	19	2	NIMA (never in mitosis gene a)-related kinase 1 (NEK1), transcript variant 4, mRNA
171536	GAGGAAGCAGCAAGAAAGATG	21	2	NM_001199400	+	1734	1752	1	19	19	19	2	NIMA (never in mitosis gene a)-related kinase 1 (NEK1), transcript variant 5, mRNA
177048	AAAAGTCTTGAAGTTGAATGC	21	2	NM_014139	-	4792	4810	1	19	19	19	2	sodium channel, voltage-gated, type XI, alpha subunit (SCN11A), mRNA
178616	ATTCTGATGCAGGCATCTCCT	21	2	NM_173647	-	1108	1128	1	21	19	6AT13	2	ring finger protein 149 (RNF149), mRNA
178811	AGTCATTGTCATAGAAAAGAC	21	2	NM_173511	-	2182	2201	1	20	19	7G12	2	family with sequence similarity 117, member B (FAM117B), mRNA
178838	TGATTCAAGAAGCAAAAGTAG	21	2	NM_003356	+	1421	1441	1	21	19	11G2A6	2	uncoupling protein 3 (mitochondrial, proton carrier) (UCP3), nuclear gene encoding mitochondrial protein, transcript variant long, mRNA
179011	ATTGGAGGAATAAAGGGAACC	21	2	NR_027034	-	1306	1324	2	20	19	19	2	uncharacterized LOC150381 (LOC150381), non-coding RNA
181507	TGTTGTATCACAACTTAGCTC	21	2	NM_145803	+	3047	3065	2	20	19	19	2	TNF receptor-associated factor 6 (TRAF6), transcript variant 1, mRNA
181507	TGTTGTATCACAACTTAGCTC	21	2	NM_004620	+	2954	2972	2	20	19	19	2	TNF receptor-associated factor 6 (TRAF6), transcript variant 2, mRNA
184218	TTAGATTCTTTCTTTTTGATC	21	2	NM_005933	-	650	670	1	21	19	5T8T6	2	myeloid/lymphoid or mixed-lineage leukemia (trithorax homolog, Drosophila) (MLL), transcript variant 2, mRNA
184218	TTAGATTCTTTCTTTTTGATC	21	2	NM_001197104	-	650	670	1	21	19	5T8T6	2	myeloid/lymphoid or mixed-lineage leukemia (trithorax homolog, Drosophila) (MLL), transcript variant 1, mRNA
184908	TTCCACAGAAATATCCGGATT	21	2	NM_001002860	+	3140	3159	2	21	19	7A12	2	BTB (POZ) domain containing 7 (BTBD7), transcript variant 1, mRNA
185407	GACGACAAACACATACCCTGTT	22	2	NM_003413	+	1908	1929	1	22	20	2C10T8	2	Zic family member 3 (ZIC3), mRNA
186772	ATCCCGAGGTCTTTGTATTTTG	22	2	NM_014023	+	3013	3034	1	22	20	5G10A5	2	WD repeat domain 37 (WDR37), mRNA
187611	GAATAAATATGGCTGTCAGGT	21	2	NM_002813	-	2194	2214	1	21	19	5AA14	2	proteasome (prosome, macropain) 26S subunit, non-ATPase, 9 (PSMD9), mRNA
189316	CATTTGAAGGTTTTGTCTCCT	21	2	NM_152354	-	1020	1040	1	21	19	6A3T10	2	zinc finger protein 285 (ZNF285), mRNA
189316	CATTTGAAGGTTTTGTCTCCT	21	2	NM_032453	-	1422	1442	1	21	19	10T3G6	2	zinc finger protein 527 (ZNF527), mRNA
190739	AAGTGACAAAAGTTGGCAAAC	21	2	NM_001167740	+	1240	1260	1	21	19	6CA13	2	SET and MYND domain containing 3 (SMYD3), transcript variant 1, mRNA
190739	AAGTGACAAAAGTTGGCAAAC	21	2	NM_022743	+	1068	1088	1	21	19	6CA13	2	SET and MYND domain containing 3 (SMYD3), transcript variant 2, mRNA
191122	TTGACTTGCTTTGGAATTTCT	21	2	NM_014484	+	2364	2382	1	19	19	19	2	molybdenum cofactor synthesis 3 (MOCS3), mRNA
191167	TTTTTGTTTGGAAATTTCTGT	21	2	NR_024390	-	1022	1042	1	21	19	14TT5	2	akirin 1 pseudogene (LOC646999), non-coding RNA
192013	TGGCCAAAGACTTGATCATAG	21	2	NM_152389	-	1225	1244	1	20	19	6A13	2	coiled-coil domain containing 108 (CCDC108), transcript variant 2, mRNA
192677	AAGAAAGAATCTAAGATCTCG	21	2	NM_000363	+	249	268	1	20	19	6G13	2	troponin I type 3 (cardiac) (TNNI3), mRNA
192968	TCTCTAAGTTCATATCTTGCTG	22	2	NM_024755	-	2586	2607	1	22	20	13A5C2	2	SAFB-like, transcription modulator (SLTM), transcript variant 1, mRNA
192968	TCTCTAAGTTCATATCTTGCTG	22	2	NM_001013843	-	2532	2553	1	22	20	13A5C2	2	SAFB-like, transcription modulator (SLTM), transcript variant 2, mRNA
193626	CTTCTTCCTCTTCTTCAACTG	21	2	NM_003715	-	2973	2992	2	21	19	3T16	2	USO1 vesicle docking protein homolog (yeast) (USO1), mRNA
193626	CTTCTTCCTCTTCTTCAACTG	21	2	NR_036466	+	155	174	1	20	19	17A2	2	uncharacterized LOC100499405 (LOC100499405), non-coding RNA
194579	TCCCAGAAGCCCCATGCTGAA	21	2	NR_026899	-	2574	2594	1	21	19	6A8G5	2	Rho GTPase activating protein 27 pseudogene (LOC146880), non-coding RNA
194579	TCCCAGAAGCCCCATGCTGAA	21	2	NM_002266	-	1688	1708	1	21	19	6A8G5	2	karyopherin alpha 2 (RAG cohort 1, importin alpha 1) (KPNA2), mRNA
194749	ACACTGTGTCTGGATTATAAA	21	2	NM_020715	-	4424	4444	1	21	19	6T9A4	2	pleckstrin homology domain containing, family H (with MyTH4 domain) member 1 (PLEKHH1), mRNA
195056	CTGGAGAGCCTTCAACAACAG	21	2	NM_022752	-	2895	2915	1	21	19	6A7A6	2	zinc finger protein 574 (ZNF574), mRNA
195239	CAACCACAGATTGTTTTCCTA	21	2	NM_207014	-	1061	1080	1	20	19	17C2	2	WD repeat domain 78 (WDR78), transcript variant 2, mRNA
195239	CAACCACAGATTGTTTTCCTA	21	2	NM_024763	-	1061	1080	1	20	19	17C2	2	WD repeat domain 78 (WDR78), transcript variant 1, mRNA
195497	TTATAGAAAGTATCTTTGGCAC	22	2	NM_020919	-	3454	3475	1	22	20	2A10C8	2	amyotrophic lateral sclerosis 2 (juvenile) (ALS2), transcript variant 1, mRNA
196237	CAGCAACTGTCTCATCACCTT	21	2	NR_033988	-	2504	2524	1	21	19	7TG12	2	uncharacterized LOC400046 (FLJ41278), non-coding RNA
199045	AATGTTACAAAGACTGTGATT	21	2	NM_018686	+	1470	1490	1	21	19	9A3C7	2	cytidine monophosphate N-acetylneuraminic acid synthetase (CMAS), mRNA
199439	CTTGGAAATAAGCAAACGTCT	21	2	NM_002463	+	2006	2026	1	21	19	8TA11	2	myxovirus (influenza virus) resistance 2 (mouse) (MX2), mRNA
200846	AAGAGATTGTGGATGATGATA	21	2	NM_080588	-	304	323	2	21	19	15T4	2	protein tyrosine phosphatase, non-receptor type 7 (PTPN7), transcript variant 2, mRNA
201110	CTTCATCTGTTTCAACAACCT	21	2	NM_018227	-	2451	2470	2	21	19	11C8	2	ubiquitin-like modifier activating enzyme 6 (UBA6), mRNA
201632	ACTGGACCAGCAAATACAAAG	21	2	NM_153035	-	2708	2728	1	21	19	6C8A5	2	transcription elongation factor A (SII) N-terminal and central domain containing 2 (TCEANC2), mRNA
201632	ACTGGACCAGCAAATACAAAG	21	2	NM_015474	-	3112	3132	1	21	19	4G9T6	2	SAM domain and HD domain 1 (SAMHD1), mRNA
202638	TTGTTGTTTTTGTTATTTTGTT	22	2	NM_001221	-	3925	3944	3	22	20	20	2	calcium/calmodulin-dependent protein kinase II delta (CAMK2D), transcript variant 3, mRNA
202638	TTGTTGTTTTTGTTATTTTGTT	22	2	NM_172127	-	3873	3892	3	22	20	20	2	calcium/calmodulin-dependent protein kinase II delta (CAMK2D), transcript variant 1, mRNA
202638	TTGTTGTTTTTGTTATTTTGTT	22	2	NM_172128	-	3829	3848	3	22	20	20	2	calcium/calmodulin-dependent protein kinase II delta (CAMK2D), transcript variant 2, mRNA
202860	TTTGAGGGTCTTGCCAGTTTT	21	2	NM_001040274	+	1922	1942	1	21	19	6GG13	2	synaptonemal complex protein 2-like (SYCP2L), mRNA
203025	CCTTTGGAACATATGAATCTGA	22	2	NM_016194	+	892	913	1	22	20	6G4T10	2	guanine nucleotide binding protein (G protein), beta 5 (GNB5), transcript variant 2, mRNA
203025	CCTTTGGAACATATGAATCTGA	22	2	NM_006578	+	787	808	1	22	20	6G4T10	2	guanine nucleotide binding protein (G protein), beta 5 (GNB5), transcript variant 1, mRNA
203367	GTGGAGCTGAGCAGGAGACAA	21	2	NM_001003941	+	112	131	1	20	19	12A7	2	oxoglutarate (alpha-ketoglutarate) dehydrogenase (lipoamide) (OGDH), nuclear gene encoding mitochondrial protein, transcript variant 2, mRNA
203367	GTGGAGCTGAGCAGGAGACAA	21	2	NM_002541	+	112	131	1	20	19	12A7	2	oxoglutarate (alpha-ketoglutarate) dehydrogenase (lipoamide) (OGDH), nuclear gene encoding mitochondrial protein, transcript variant 1, mRNA
203367	GTGGAGCTGAGCAGGAGACAA	21	2	NM_001165036	+	112	131	1	20	19	12A7	2	oxoglutarate (alpha-ketoglutarate) dehydrogenase (lipoamide) (OGDH), nuclear gene encoding mitochondrial protein, transcript variant 3, mRNA
207155	AGAACATTTGTAGACATTTCT	21	2	NM_032944	-	3430	3450	1	21	19	9G4C6	2	serine/threonine kinase 31 (STK31), transcript variant 2, mRNA
207155	AGAACATTTGTAGACATTTCT	21	2	NM_031414	-	3186	3206	1	21	19	9G4C6	2	serine/threonine kinase 31 (STK31), transcript variant 1, mRNA
207155	AGAACATTTGTAGACATTTCT	21	2	NM_001122833	-	3178	3198	1	21	19	9G4C6	2	serine/threonine kinase 31 (STK31), transcript variant 3, mRNA
208437	TTCATTTCAGAAAGCCTGACA	21	2	NM_004363	+	2249	2269	1	21	19	10A3C6	2	carcinoembryonic antigen-related cell adhesion molecule 5 (CEACAM5), mRNA
211799	CAACCATCCCTATTTTTGCTGA	22	2	NM_001777	-	2015	2036	1	22	20	7CC13	2	CD47 molecule (CD47), transcript variant 1, mRNA
211799	CAACCATCCCTATTTTTGCTGA	22	2	NM_198793	-	1957	1978	1	22	20	7CC13	2	CD47 molecule (CD47), transcript variant 2, mRNA
212877	CTTACTGGATTCATGAACTTG	21	2	NM_172070	+	7408	7427	2	21	19	4T15	2	ubiquitin protein ligase E3 component n-recognin 3 (putative) (UBR3), mRNA
212997	CAATTTCCCTTCGTGTGATCC	21	2	NM_000379	+	5281	5301	1	21	19	5T6G8	2	xanthine dehydrogenase (XDH), mRNA
213339	TCTTGGTGCTTGTGGCTCAGA	21	2	NM_001115113	+	1391	1411	1	21	19	5G10T4	2	WD repeat domain 26 (WDR26), transcript variant 2, mRNA
213339	TCTTGGTGCTTGTGGCTCAGA	21	2	NM_025160	+	1439	1459	1	21	19	5G10T4	2	WD repeat domain 26 (WDR26), transcript variant 1, mRNA
214269	TATTCTTAATCAAACCTCACT	21	2	NM_021224	+	7823	7842	2	21	19	16C3	2	zinc finger protein 462 (ZNF462), mRNA
214927	ATGATCAAGTCTTTGGCCACT	21	2	NM_020960	-	4837	4856	2	21	19	10T9	2	G protein-coupled receptor 107 (GPR107), transcript variant 3, mRNA
214927	ATGATCAAGTCTTTGGCCACT	21	2	NM_001136558	-	4894	4913	2	21	19	10T9	2	G protein-coupled receptor 107 (GPR107), transcript variant 2, mRNA
214927	ATGATCAAGTCTTTGGCCACT	21	2	NM_001136557	-	4981	5000	2	21	19	10T9	2	G protein-coupled receptor 107 (GPR107), transcript variant 1, mRNA
215249	GAATCAGAGGGTTATGATCTT	21	2	NM_001024660	+	7463	7483	1	21	19	9G2T8	2	kalirin, RhoGEF kinase (KALRN), transcript variant 1, mRNA
215249	GAATCAGAGGGTTATGATCTT	21	2	NM_007064	+	2408	2428	1	21	19	9G2T8	2	kalirin, RhoGEF kinase (KALRN), transcript variant 3, mRNA
215274	TCTGGAGAGAATCTAAAAATG	21	2	NR_030672	+	268	288	1	21	19	9A5A5	2	KIAA1324-like (KIAA1324L), transcript variant 3, non-coding RNA
215274	TCTGGAGAGAATCTAAAAATG	21	2	NM_001142749	+	510	530	1	21	19	9A5A5	2	KIAA1324-like (KIAA1324L), transcript variant 1, mRNA
215474	CAACGAAATTCTGGATAAAGA	21	2	NM_019067	-	7605	7625	1	21	19	8TT11	2	guanine nucleotide binding protein-like 3 (nucleolar)-like (GNL3L), transcript variant 2, mRNA
215474	CAACGAAATTCTGGATAAAGA	21	2	NM_001184819	-	7722	7742	1	21	19	8TT11	2	guanine nucleotide binding protein-like 3 (nucleolar)-like (GNL3L), transcript variant 1, mRNA
216086	TAAAAGCTATAGAGCCACTGG	21	2	NM_001037329	-	763	783	1	21	19	14CC5	2	cyclic nucleotide gated channel alpha 4 (CNGA4), mRNA
216352	TAATTTCAAGATGTCTGGATT	21	2	NM_018042	-	976	996	1	21	19	9G4C6	2	schlafen family member 12 (SLFN12), mRNA
216377	AGTGGATCAACGAATTGGATG	21	2	NM_006140	-	800	820	1	21	19	4G5C10	2	colony stimulating factor 2 receptor, alpha, low-affinity (granulocyte-macrophage) (CSF2RA), transcript variant 1, mRNA
216377	AGTGGATCAACGAATTGGATG	21	2	NM_172245	-	776	796	1	21	19	4G5C10	2	colony stimulating factor 2 receptor, alpha, low-affinity (granulocyte-macrophage) (CSF2RA), transcript variant 2, mRNA
216377	AGTGGATCAACGAATTGGATG	21	2	NM_172246	-	800	820	1	21	19	4G5C10	2	colony stimulating factor 2 receptor, alpha, low-affinity (granulocyte-macrophage) (CSF2RA), transcript variant 3, mRNA
216377	AGTGGATCAACGAATTGGATG	21	2	NM_172247	-	632	652	1	21	19	4G5C10	2	colony stimulating factor 2 receptor, alpha, low-affinity (granulocyte-macrophage) (CSF2RA), transcript variant 4, mRNA
216377	AGTGGATCAACGAATTGGATG	21	2	NM_172249	-	800	820	1	21	19	4G5C10	2	colony stimulating factor 2 receptor, alpha, low-affinity (granulocyte-macrophage) (CSF2RA), transcript variant 6, mRNA
216377	AGTGGATCAACGAATTGGATG	21	2	NM_001161529	-	928	948	1	21	19	4G5C10	2	colony stimulating factor 2 receptor, alpha, low-affinity (granulocyte-macrophage) (CSF2RA), transcript variant 7, mRNA
216377	AGTGGATCAACGAATTGGATG	21	2	NM_001161530	-	632	652	1	21	19	4G5C10	2	colony stimulating factor 2 receptor, alpha, low-affinity (granulocyte-macrophage) (CSF2RA), transcript variant 8, mRNA
216377	AGTGGATCAACGAATTGGATG	21	2	NM_001161531	-	800	820	1	21	19	4G5C10	2	colony stimulating factor 2 receptor, alpha, low-affinity (granulocyte-macrophage) (CSF2RA), transcript variant 9, mRNA
216377	AGTGGATCAACGAATTGGATG	21	2	NM_001161532	-	569	589	1	21	19	4G5C10	2	colony stimulating factor 2 receptor, alpha, low-affinity (granulocyte-macrophage) (CSF2RA), transcript variant 10, mRNA
216377	AGTGGATCAACGAATTGGATG	21	2	NR_027760	-	800	820	1	21	19	4G5C10	2	colony stimulating factor 2 receptor, alpha, low-affinity (granulocyte-macrophage) (CSF2RA), transcript variant 11, non-coding RNA
216452	AAAACAGGCTTATGACTTCTT	21	2	NM_032321	+	1985	2005	1	21	19	4C11T4	2	chromosome 2 open reading frame 88 (C2orf88), transcript variant 4, mRNA
216452	AAAACAGGCTTATGACTTCTT	21	2	NM_001042519	+	2058	2078	1	21	19	4C11T4	2	chromosome 2 open reading frame 88 (C2orf88), transcript variant 1, mRNA
216452	AAAACAGGCTTATGACTTCTT	21	2	NM_001042520	+	2014	2034	1	21	19	4C11T4	2	chromosome 2 open reading frame 88 (C2orf88), transcript variant 3, mRNA
216452	AAAACAGGCTTATGACTTCTT	21	2	NM_001042521	+	2026	2046	1	21	19	4C11T4	2	chromosome 2 open reading frame 88 (C2orf88), transcript variant 2, mRNA
216698	TAGGTCATTGCATAATTTGTT	21	2	NM_207014	-	891	911	1	21	19	11A4T4	2	WD repeat domain 78 (WDR78), transcript variant 2, mRNA
216698	TAGGTCATTGCATAATTTGTT	21	2	NM_024763	-	891	911	1	21	19	11A4T4	2	WD repeat domain 78 (WDR78), transcript variant 1, mRNA
217078	TTTTTTGTTTGTTTTTCTTTTT	22	2	NM_001033723	+	2030	2049	2	21	20	20	2	zinc finger protein 704 (ZNF704), mRNA
217263	TCAGCTCTGGGTGAATCACAAA	22	2	NM_001199295	-	3386	3406	2	22	20	3C17	2	zinc finger protein 549 (ZNF549), transcript variant 1, mRNA
217263	TCAGCTCTGGGTGAATCACAAA	22	2	NM_153263	-	3347	3367	2	22	20	3C17	2	zinc finger protein 549 (ZNF549), transcript variant 2, mRNA
217665	TCTCATTCCTCTCATCAAAAT	21	2	NM_152432	+	1918	1938	1	21	19	12C1T6	2	Rho GTPase activating protein 42 (ARHGAP42), mRNA
218216	TTGTTGGCATTCTTGATCTTC	21	2	NM_001770	+	982	1002	1	21	19	4T9G6	2	CD19 molecule (CD19), transcript variant 2, mRNA
218216	TTGTTGGCATTCTTGATCTTC	21	2	NM_001178098	+	982	1002	1	21	19	4T9G6	2	CD19 molecule (CD19), transcript variant 1, mRNA
220802	TGTCAGTGGCTCCAATCCTGT	21	2	NR_036634	+	708	728	1	21	19	8G4A7	2	transforming growth factor, beta receptor III (TGFBR3), transcript variant 4, non-coding RNA
220802	TGTCAGTGGCTCCAATCCTGT	21	2	NM_001195684	+	447	467	1	21	19	8G4A7	2	transforming growth factor, beta receptor III (TGFBR3), transcript variant 3, mRNA
220802	TGTCAGTGGCTCCAATCCTGT	21	2	NM_003243	+	611	631	1	21	19	8G4A7	2	transforming growth factor, beta receptor III (TGFBR3), transcript variant 1, mRNA
220802	TGTCAGTGGCTCCAATCCTGT	21	2	NM_001195683	+	611	631	1	21	19	8G4A7	2	transforming growth factor, beta receptor III (TGFBR3), transcript variant 2, mRNA
222267	GTTCCCTTTATTCCTCCAATC	21	2	NR_027034	+	1306	1324	1	19	19	19	2	uncharacterized LOC150381 (LOC150381), non-coding RNA
222691	TTTAAAGCTGTCTCAACACTG	21	2	NR_003255	+	34273	34293	1	21	19	10T5C4	2	TSIX transcript, XIST antisense RNA (non-protein coding) (TSIX), antisense RNA
222691	TTTAAAGCTGTCTCAACACTG	21	2	NR_001564	-	13434	13454	1	21	19	10T5C4	2	X (inactive)-specific transcript (non-protein coding) (XIST), non-coding RNA
223252	GACCAGATCAAGAAGATGAGT	21	2	NM_016410	+	339	358	1	20	19	2C17	2	charged multivesicular body protein 5 (CHMP5), transcript variant 1, mRNA
223252	GACCAGATCAAGAAGATGAGT	21	2	NM_001195536	+	339	358	1	20	19	2C17	2	charged multivesicular body protein 5 (CHMP5), transcript variant 2, mRNA
223290	TCTGCTTCACTCGCTCCTCTT	21	2	NM_001456	-	1821	1840	1	20	19	10T9	2	filamin A, alpha (FLNA), transcript variant 1, mRNA
223290	TCTGCTTCACTCGCTCCTCTT	21	2	NM_001110556	-	1821	1840	1	20	19	10T9	2	filamin A, alpha (FLNA), transcript variant 2, mRNA
223372	TAACTTCGACAAGATTGAATT	21	2	NM_015055	+	349	368	2	21	19	5C14	2	SWAP switching B-cell complex 70kDa subunit (SWAP70), mRNA
223429	ACCAGATTCTGATCTTCCTCG	21	2	NM_001410	-	10254	10273	1	20	19	6T13	2	multiple EGF-like-domains 8 (MEGF8), mRNA
223512	ATCCTTTCTTTTATTTCTTCTT	22	2	NM_002792	-	836	857	1	22	20	2C9A9	2	proteasome (prosome, macropain) subunit, alpha type, 7 (PSMA7), mRNA
224625	AACAGGGTATGTGTTTGTCGTC	22	2	NM_003413	-	1908	1929	1	22	20	8A10G2	2	Zic family member 3 (ZIC3), mRNA
226009	GTTTCTATATCAAAACTGGTT	21	2	NM_000945	+	2299	2319	1	21	19	6A3C10	2	protein phosphatase 3, regulatory subunit B, alpha (PPP3R1), mRNA
226499	CTTGCAAATAACAGAAATGTT	21	2	NM_001136505	+	950	970	1	21	19	13G1A5	2	coiled-coil domain containing 79 (CCDC79), mRNA
227230	TCAACAATCTCTGAAAACAGA	21	2	NM_021930	-	1530	1549	1	20	19	5A14	2	RAD50 interactor 1 (RINT1), mRNA
227230	TCAACAATCTCTGAAAACAGA	21	2	NM_017925	-	4956	4976	1	21	19	4C10A5	2	DENN/MADD domain containing 4C (DENND4C), mRNA
227329	TCTGAGAAAAATTCCAAAATG	21	2	NM_001007561	-	6873	6892	1	20	19	12T7	2	immunity-related GTPase family, Q (IRGQ), mRNA
228114	AGCAGACTTGGCTGAACACAG	21	2	NM_016940	+	473	493	1	21	19	8TG11	2	RWD domain containing 2B (RWDD2B), mRNA
230022	ATTGCCTGACACACTGCCACT	21	2	NM_017969	-	1684	1704	1	21	19	10A5C4	2	IWS1 homolog (S. cerevisiae) (IWS1), mRNA
232614	TCTGTCATGATAGGAACTGTG	21	2	NM_024611	-	1504	1524	1	21	19	9A4A6	2	NMDA receptor regulated 2 (NARG2), transcript variant 1, mRNA
232614	TCTGTCATGATAGGAACTGTG	21	2	NM_001018089	-	1344	1364	1	21	19	9A4A6	2	NMDA receptor regulated 2 (NARG2), transcript variant 2, mRNA
232850	ACTCTCAGGCTTTTGTAAAAG	21	2	NM_052872	-	190	209	1	20	19	15T4	2	interleukin 17F (IL17F), mRNA
233695	TGAAGATGAGTTTGATGAAGAA	22	2	NM_006401	+	908	928	2	22	20	5T15	2	acidic (leucine-rich) nuclear phosphoprotein 32 family, member B (ANP32B), mRNA
235919	AGATGAGTTTGATGAAGAAGAA	22	2	NM_006401	+	910	930	1	21	20	3T17	2	acidic (leucine-rich) nuclear phosphoprotein 32 family, member B (ANP32B), mRNA
235919	AGATGAGTTTGATGAAGAAGAA	22	2	NM_152401	+	277	297	1	21	20	6G14	2	phosducin-like 2 (PDCL2), mRNA
236519	TTCCAGATAAGAAATGCTCCT	21	2	NM_001040616	+	475	495	1	21	19	7T3A9	2	lines homolog (Drosophila) (LINS), transcript variant 6, mRNA
236576	ACATTTTTAGCTTTGGACATGA	22	2	NM_022726	-	1697	1718	1	22	20	7T11T2	2	ELOVL fatty acid elongase 4 (ELOVL4), mRNA
237533	ATAGAGCCACTGGAATGCATG	21	2	NR_027055	+	574	593	2	21	19	17A2	2	family with sequence similarity 41, member C (FAM41C), non-coding RNA
239332	TCTTCTGATGAAAAGCTTGCT	21	2	NM_175907	+	881	901	1	21	19	15CT4	2	zinc binding alcohol dehydrogenase domain containing 2 (ZADH2), mRNA
239332	TCTTCTGATGAAAAGCTTGCT	21	2	NM_018036	-	2021	2041	1	21	19	7A6G6	2	ATG2 autophagy related 2 homolog B (S. cerevisiae) (ATG2B), mRNA
239976	CTCAATGGCAACTTACATGTC	21	2	NM_016206	-	4879	4899	1	21	19	5T8A6	2	vestigial like 3 (Drosophila) (VGLL3), mRNA
242056	CAAAATCTTTGTTAAAGCTTG	21	2	NM_015141	+	3282	3301	2	21	19	16C3	2	glycerol-3-phosphate dehydrogenase 1-like (GPD1L), mRNA
245882	CTTGTTGGCATTCTTGATCTT	21	2	NM_001770	+	981	1001	1	21	19	5T9G5	2	CD19 molecule (CD19), transcript variant 2, mRNA
245882	CTTGTTGGCATTCTTGATCTT	21	2	NM_001178098	+	981	1001	1	21	19	5T9G5	2	CD19 molecule (CD19), transcript variant 1, mRNA
245903	ATTTTGACTTGCTTTGGAATT	21	2	NM_014484	+	2363	2381	3	21	19	19	2	molybdenum cofactor synthesis 3 (MOCS3), mRNA
248349	TCCAGACCCAACAGCTCCCCT	21	2	NM_002883	-	2879	2899	1	21	19	9A2A8	2	Ran GTPase activating protein 1 (RANGAP1), mRNA
248379	CTGGACCAGCAAATACAAAGAA	22	2	NM_153035	-	2706	2727	1	22	20	5C8A7	2	transcription elongation factor A (SII) N-terminal and central domain containing 2 (TCEANC2), mRNA
249929	ATATGAACTTAGAGAAAATACT	22	2	NM_016207	+	2103	2124	1	22	20	10A2G8	2	cleavage and polyadenylation specific factor 3, 73kDa (CPSF3), mRNA
250894	AGGAGCATTTCTTATCTGGAA	21	2	NM_001040616	-	475	495	1	21	19	9T3A7	2	lines homolog (Drosophila) (LINS), transcript variant 6, mRNA
252063	TTGTATAAAGGCTTGCTTGGC	21	2	NM_001243744	+	2315	2335	1	21	19	4A11T4	2	Fanconi anemia, complementation group C (FANCC), transcript variant 3, mRNA
252860	CAACAGAACTGTAAATTCTCT	21	2	NM_016107	-	4372	4391	2	21	19	16C3	2	zinc finger RNA binding protein (ZFR), mRNA
253526	AGCAGTTGTTAGGAAGATCCG	21	2	NM_004079	-	2609	2628	1	20	19	9T10	2	cathepsin S (CTSS), transcript variant 1, mRNA
253526	AGCAGTTGTTAGGAAGATCCG	21	2	NM_001199739	-	2459	2478	1	20	19	9T10	2	cathepsin S (CTSS), transcript variant 2, mRNA
254585	GTTGGATAAAAATGCAAATTT	21	2	NM_001080392	+	6197	6217	1	21	19	7A3A9	2	KIAA1147 (KIAA1147), mRNA
255713	TCTTTCTTTTTGATCCCGCTT	21	2	NR_033900	-	647	667	1	21	19	5C9C5	2	uncharacterized LOC285441 (LOC285441), non-coding RNA
255713	TCTTTCTTTTTGATCCCGCTT	21	2	NM_000128	+	2424	2444	1	21	19	5C9C5	2	coagulation factor XI (F11), mRNA
257449	TTTCCAAACCTTCTAAGCAGG	21	2	NM_004964	-	1808	1828	1	21	19	8C2T9	2	histone deacetylase 1 (HDAC1), mRNA
258178	GATTTCTCTCATCTTGTCTGAG	22	2	NM_015272	-	6105	6124	3	22	20	20	2	RPGRIP1-like (RPGRIP1L), transcript variant 1, mRNA
258178	GATTTCTCTCATCTTGTCTGAG	22	2	NM_001127897	-	5865	5884	3	22	20	20	2	RPGRIP1-like (RPGRIP1L), transcript variant 2, mRNA
258661	TTCTTCCCCTCTTAGATAACTA	22	2	NM_001039937	+	1288	1308	1	21	20	17A3	2	integrator complex subunit 6 (INTS6), transcript variant 2, mRNA
258661	TTCTTCCCCTCTTAGATAACTA	22	2	NM_012141	+	1780	1800	1	21	20	17A3	2	integrator complex subunit 6 (INTS6), transcript variant 1, mRNA
258924	TTTCTCTCATCTTGTCTGAGGC	22	2	NM_015272	-	6105	6124	1	20	20	20	2	RPGRIP1-like (RPGRIP1L), transcript variant 1, mRNA
258924	TTTCTCTCATCTTGTCTGAGGC	22	2	NM_001127897	-	5865	5884	1	20	20	20	2	RPGRIP1-like (RPGRIP1L), transcript variant 2, mRNA
262849	TAGAGCCGTTGTCTATATTAG	21	1	NM_001167672	+	16054	16074	1	21	19	9T4A6	2	LIM domain containing preferred translocation partner in lipoma (LPP), transcript variant 3, mRNA
262849	TAGAGCCGTTGTCTATATTAG	21	1	NM_005578	+	16585	16605	1	21	19	9T4A6	2	LIM domain containing preferred translocation partner in lipoma (LPP), transcript variant 1, mRNA
262849	TAGAGCCGTTGTCTATATTAG	21	1	NM_001167671	+	16528	16548	1	21	19	9T4A6	2	LIM domain containing preferred translocation partner in lipoma (LPP), transcript variant 2, mRNA
263410	ATCAAAAAGAAAGAATCTAAGA	22	1	NM_006828	+	1905	1926	1	22	20	11A4C5	2	activating signal cointegrator 1 complex subunit 3 (ASCC3), transcript variant 1, mRNA
265132	TATGAAAAAACTGATAAGACA	21	1	NM_138573	+	966	985	2	21	19	13T6	2	neuregulin 4 (NRG4), mRNA
266482	ATCTGTCATGATAGGAACTGT	21	1	NM_024611	-	1505	1525	1	21	19	10A4A5	2	NMDA receptor regulated 2 (NARG2), transcript variant 1, mRNA
266482	ATCTGTCATGATAGGAACTGT	21	1	NM_001018089	-	1345	1365	1	21	19	10A4A5	2	NMDA receptor regulated 2 (NARG2), transcript variant 2, mRNA
267070	GACAGGATTGGAGCCACTGACA	22	1	NR_036634	-	708	729	1	22	20	8T4C8	2	transforming growth factor, beta receptor III (TGFBR3), transcript variant 4, non-coding RNA
267070	GACAGGATTGGAGCCACTGACA	22	1	NM_001195684	-	447	468	1	22	20	8T4C8	2	transforming growth factor, beta receptor III (TGFBR3), transcript variant 3, mRNA
267070	GACAGGATTGGAGCCACTGACA	22	1	NM_003243	-	611	632	1	22	20	8T4C8	2	transforming growth factor, beta receptor III (TGFBR3), transcript variant 1, mRNA
267070	GACAGGATTGGAGCCACTGACA	22	1	NM_001195683	-	611	632	1	22	20	8T4C8	2	transforming growth factor, beta receptor III (TGFBR3), transcript variant 2, mRNA
267837	GTGCTTGTTTCTGTGATGATC	21	1	NM_014487	+	791	809	3	21	19	19	2	zinc finger protein 330 (ZNF330), mRNA
271443	GAAGATTTTAAGGTAGATATC	21	1	NM_152585	-	1836	1855	1	20	19	3G16	2	RNA binding motif protein, Y-linked, family 1, member F (RBMY1F), mRNA
271443	GAAGATTTTAAGGTAGATATC	21	1	NM_001006117	-	1835	1854	1	20	19	3G16	2	RNA binding motif protein, Y-linked, family 1, member J (RBMY1J), mRNA
271443	GAAGATTTTAAGGTAGATATC	21	1	NM_005058	-	1842	1861	1	20	19	3G16	2	RNA binding motif protein, Y-linked, family 1, member A1 (RBMY1A1), mRNA
271443	GAAGATTTTAAGGTAGATATC	21	1	NM_001006118	-	1836	1855	1	20	19	3G16	2	RNA binding motif protein, Y-linked, family 1, member E (RBMY1E), mRNA
271443	GAAGATTTTAAGGTAGATATC	21	1	NM_001006120	-	1836	1855	1	20	19	3G16	2	RNA binding motif protein, Y-linked, family 1, member D (RBMY1D), mRNA
271443	GAAGATTTTAAGGTAGATATC	21	1	NM_001006121	-	1876	1895	1	20	19	3G16	2	RNA binding motif protein, Y-linked, family 1, member B (RBMY1B), mRNA
271791	CTCTGAAGACATGATGCAATT	21	1	NM_207412	+	1914	1934	1	21	19	9C2G8	2	chromosome 8 open reading frame 86 (C8orf86), mRNA
272293	TACTGACTCTTGAGGATTTGT	21	1	NM_006187	-	1439	1459	1	21	19	15AT4	2	2'-5'-oligoadenylate synthetase 3, 100kDa (OAS3), mRNA
276940	ACAAAAATCTTGGAAACCTGT	21	1	NM_001145191	-	2360	2379	2	21	19	16C3	2	family with sequence similarity 200, member B (FAM200B), mRNA
277468	AAGAATATGATGGTCACAAAG	21	1	NM_025164	+	572	592	1	21	19	13T1A5	2	SIK family kinase 3 (SIK3), mRNA
286445	TGTCAACAATCTCTGAAAACAG	22	1	NM_021930	-	1530	1550	2	22	20	6A14	2	RAD50 interactor 1 (RINT1), mRNA
287220	TCATCTTCATCAAAGGCATCT	21	1	NM_000057	-	1771	1791	1	21	19	5T9G5	2	Bloom syndrome, RecQ helicase-like (BLM), mRNA
287220	TCATCTTCATCAAAGGCATCT	21	1	NM_000329	-	1482	1502	1	21	19	8A2A9	2	retinal pigment epithelium-specific protein 65kDa (RPE65), mRNA
288510	GAAGATAGATTTTGCCAGGGG	21	1	NM_020547	+	7	27	1	21	19	5T6T8	2	anti-Mullerian hormone receptor, type II (AMHR2), transcript variant 1, mRNA
288510	GAAGATAGATTTTGCCAGGGG	21	1	NM_001164690	+	7	27	1	21	19	5T6T8	2	anti-Mullerian hormone receptor, type II (AMHR2), transcript variant 2, mRNA
288510	GAAGATAGATTTTGCCAGGGG	21	1	NM_001164691	+	7	27	1	21	19	5T6T8	2	anti-Mullerian hormone receptor, type II (AMHR2), transcript variant 3, mRNA
289767	AAGCAATAGATAAATAAAATG	21	1	NM_012275	+	2663	2682	2	21	19	16A3	2	interleukin 36 receptor antagonist (IL36RN), transcript variant 1, mRNA
289767	AAGCAATAGATAAATAAAATG	21	1	NM_173170	+	2635	2654	2	21	19	16A3	2	interleukin 36 receptor antagonist (IL36RN), transcript variant 2, mRNA
297966	GGATCTGAAATTGGTTGGAAG	21	1	NM_177972	+	3367	3386	2	21	19	14T5	2	tubby homolog (mouse) (TUB), transcript variant 2, mRNA
297966	GGATCTGAAATTGGTTGGAAG	21	1	NM_003320	+	3624	3643	2	21	19	14T5	2	tubby homolog (mouse) (TUB), transcript variant 1, mRNA
306372	GTGACAAAGCTCAGCAGGATGG	22	1	NM_172239	-	1703	1723	2	22	20	3C17	2	REX1, RNA exonuclease 1 homolog (S. cerevisiae)-like 1 (REXO1L1), mRNA
306372	GTGACAAAGCTCAGCAGGATGG	22	1	NR_003594	-	719	739	2	22	20	3C17	2	REX1, RNA exonuclease 1 homolog (S. cerevisiae)-like 2 (pseudogene) (REXO1L2P), non-coding RNA
308201	TCACTCTTGTGCAATGAAAGCT	22	1	NR_037701	+	233	254	1	22	20	10G4G6	2	DKFZp434H1419 (PKI55), non-coding RNA
310210	GCAAGATATGAACTTAGAGAA	21	1	NM_024755	+	2589	2608	2	21	19	5T14	2	SAFB-like, transcription modulator (SLTM), transcript variant 1, mRNA
310210	GCAAGATATGAACTTAGAGAA	21	1	NM_001013843	+	2535	2554	2	21	19	5T14	2	SAFB-like, transcription modulator (SLTM), transcript variant 2, mRNA
313986	AATATCATCAAAAATAGGGATA	22	1	NM_212482	-	4190	4211	1	22	20	2T3A15	2	fibronectin 1 (FN1), transcript variant 1, mRNA
314286	AAAAGTGTGGAAGAATATGAT	21	1	NM_007246	+	1790	1810	1	21	19	8G4A7	2	kelch-like 2, Mayven (Drosophila) (KLHL2), transcript variant 1, mRNA
314286	AAAAGTGTGGAAGAATATGAT	21	1	NM_001161521	+	1667	1687	1	21	19	8G4A7	2	kelch-like 2, Mayven (Drosophila) (KLHL2), transcript variant 2, mRNA
314286	AAAAGTGTGGAAGAATATGAT	21	1	NM_001161522	+	1560	1580	1	21	19	8G4A7	2	kelch-like 2, Mayven (Drosophila) (KLHL2), transcript variant 3, mRNA
316857	CAAAATGTTTGGTCATCCACA	21	1	NM_152504	+	398	416	3	21	19	19	2	chromosome 20 open reading frame 196 (C20orf196), mRNA
317808	GGAGCTGTTGGGTCTGGAAAGT	22	1	NM_003162	-	1137	1158	1	22	20	7T11A2	2	striatin, calmodulin binding protein (STRN), mRNA
320834	TTTGTTGTTTTTGTTATTTTGT	22	1	NM_178153	+	1309	1329	1	21	20	9T11	2	doublecortin (DCX), transcript variant 3, mRNA
320834	TTTGTTGTTTTTGTTATTTTGT	22	1	NM_000555	+	1607	1627	1	21	20	9T11	2	doublecortin (DCX), transcript variant 1, mRNA
320834	TTTGTTGTTTTTGTTATTTTGT	22	1	NM_001195553	+	1327	1347	1	21	20	9T11	2	doublecortin (DCX), transcript variant 5, mRNA
320834	TTTGTTGTTTTTGTTATTTTGT	22	1	NM_178151	+	1436	1456	1	21	20	9T11	2	doublecortin (DCX), transcript variant 4, mRNA
320834	TTTGTTGTTTTTGTTATTTTGT	22	1	NM_178152	+	1324	1344	1	21	20	9T11	2	doublecortin (DCX), transcript variant 2, mRNA
321175	TCAGAAAAAACATTGTATGGA	21	1	NM_014701	+	1221	1241	1	21	19	11A3T5	2	SECIS binding protein 2-like (SECISBP2L), transcript variant 2, mRNA
321175	TCAGAAAAAACATTGTATGGA	21	1	NM_001193489	+	1221	1241	1	21	19	11A3T5	2	SECIS binding protein 2-like (SECISBP2L), transcript variant 1, mRNA
322603	TCATGTATTCTTGGACAAAGGA	22	1	NM_018238	-	2802	2823	1	22	20	15C3G2	2	acylglycerol kinase (AGK), nuclear gene encoding mitochondrial protein, mRNA
322943	AGAAGAATAGAACTGATAACA	21	1	NM_001077692	+	4227	4247	1	21	19	7T4C8	2	asparagine-linked glycosylation 9, alpha-1,2-mannosyltransferase homolog (S. cerevisiae) (ALG9), transcript variant 4, mRNA
322943	AGAAGAATAGAACTGATAACA	21	1	NM_001077691	+	4248	4268	1	21	19	7T4C8	2	asparagine-linked glycosylation 9, alpha-1,2-mannosyltransferase homolog (S. cerevisiae) (ALG9), transcript variant 3, mRNA
322943	AGAAGAATAGAACTGATAACA	21	1	NM_024740	+	3971	3991	1	21	19	7T4C8	2	asparagine-linked glycosylation 9, alpha-1,2-mannosyltransferase homolog (S. cerevisiae) (ALG9), transcript variant 1, mRNA
322943	AGAAGAATAGAACTGATAACA	21	1	NM_001077690	+	3950	3970	1	21	19	7T4C8	2	asparagine-linked glycosylation 9, alpha-1,2-mannosyltransferase homolog (S. cerevisiae) (ALG9), transcript variant 2, mRNA
325474	GCTGCTTTTAAGCAAGTTCTGC	22	1	NM_001008224	+	128	149	1	22	20	6T4G10	2	uveal autoantigen with coiled-coil domains and ankyrin repeats (UACA), transcript variant 2, mRNA
330730	GAGACAGCTTTAAACATTTCT	21	1	NR_027055	-	1580	1599	2	21	19	6C13	2	family with sequence similarity 41, member C (FAM41C), non-coding RNA
332989	TTTTTCTTTTTTGTTTTTTGTT	22	1	NM_024665	+	2586	2605	1	20	20	20	2	transducin (beta)-like 1 X-linked receptor 1 (TBL1XR1), mRNA
337048	AATGAATATAGGAATGAGTTCT	22	1	NM_018834	+	504	525	1	22	20	7A1A12	2	matrin 3 (MATR3), transcript variant 2, mRNA
337048	AATGAATATAGGAATGAGTTCT	22	1	NM_001194954	+	861	882	1	22	20	7A1A12	2	matrin 3 (MATR3), transcript variant 3, mRNA
337048	AATGAATATAGGAATGAGTTCT	22	1	NM_199189	+	943	964	1	22	20	7A1A12	2	matrin 3 (MATR3), transcript variant 1, mRNA
337048	AATGAATATAGGAATGAGTTCT	22	1	NM_001194955	+	621	642	1	22	20	7A1A12	2	matrin 3 (MATR3), transcript variant 4, mRNA
337314	TTTATAAGATTATCAATAGAT	21	1	NM_002293	-	5863	5883	1	21	19	9T6T4	2	laminin, gamma 1 (formerly LAMB2) (LAMC1), mRNA
337684	TTAAGAAGTTCAGAGGAAATA	21	1	NM_001134745	+	1392	1412	1	21	19	7G4G8	2	leucine rich repeat transmembrane neuronal 4 (LRRTM4), transcript variant 1, mRNA
337684	TTAAGAAGTTCAGAGGAAATA	21	1	NM_024993	+	1392	1412	1	21	19	7G4G8	2	leucine rich repeat transmembrane neuronal 4 (LRRTM4), transcript variant 2, mRNA
339754	TCATTAATTGCAAAACACCAAG	22	1	NM_001002257	+	4722	4743	1	22	20	6AT14	2	lysocardiolipin acyltransferase 1 (LCLAT1), transcript variant 2, mRNA
339754	TCATTAATTGCAAAACACCAAG	22	1	NM_182551	+	4927	4948	1	22	20	6AT14	2	lysocardiolipin acyltransferase 1 (LCLAT1), transcript variant 1, mRNA
340472	ATTTTTTGATTTTTGTTTGATT	22	1	NM_001170553	-	2667	2688	1	22	20	8A10A2	2	V-set and immunoglobulin domain containing 1 (VSIG1), transcript variant 1, mRNA
340472	ATTTTTTGATTTTTGTTTGATT	22	1	NM_182607	-	2559	2580	1	22	20	8A10A2	2	V-set and immunoglobulin domain containing 1 (VSIG1), transcript variant 2, mRNA
341386	ATAACAATGTTTTGTTCTGCT	21	1	NM_017994	+	1108	1128	1	21	19	14T1C4	2	chromosome 7 open reading frame 42 (C7orf42), mRNA
341983	AAATTTGGGTTTTGTTTTTGTT	22	1	NR_027473	+	6859	6879	2	22	20	5G15	2	lysine (K)-specific demethylase 2A (KDM2A), transcript variant 2, non-coding RNA
341983	AAATTTGGGTTTTGTTTTTGTT	22	1	NM_012308	+	7311	7331	2	22	20	5G15	2	lysine (K)-specific demethylase 2A (KDM2A), transcript variant 1, mRNA
341983	AAATTTGGGTTTTGTTTTTGTT	22	1	NM_001256405	+	5303	5323	2	22	20	5G15	2	lysine (K)-specific demethylase 2A (KDM2A), transcript variant 3, mRNA
345893	TCAGGATAAAATATTCTCATT	21	1	NM_000758	-	636	656	1	21	19	4G11T4	2	colony stimulating factor 2 (granulocyte-macrophage) (CSF2), mRNA
346417	ATTTTCTTTTCCATGTTTTCTT	22	1	NM_017934	-	4953	4973	2	22	20	3T17	2	pleckstrin homology domain interacting protein (PHIP), mRNA
347206	CAATAAAGATAAAGAAAGCTT	21	1	NM_021110	+	571	589	1	19	19	19	2	collagen, type XIV, alpha 1 (COL14A1), mRNA
347235	CAAAACCATAAAAAACAGGCTT	22	1	NM_001013649	-	3414	3435	1	22	20	7A5A8	2	chromosome 2 open reading frame 68 (C2orf68), mRNA
347395	AAGCAGTTGTTAGGAAGATCC	21	1	NM_004079	-	2609	2628	2	21	19	9T10	2	cathepsin S (CTSS), transcript variant 1, mRNA
347395	AAGCAGTTGTTAGGAAGATCC	21	1	NM_001199739	-	2459	2478	2	21	19	9T10	2	cathepsin S (CTSS), transcript variant 2, mRNA
349342	TTCTATCCACCAACTAAAAAG	21	1	NM_003730	+	1146	1166	1	21	19	8A3A8	2	ribonuclease T2 (RNASET2), mRNA
350011	TATGTTTATTTTCTTTCTTTA	21	1	NM_001080534	+	6884	6903	2	21	19	11C8	2	unc-13 homolog C (C. elegans) (UNC13C), mRNA
359072	ACTGGACCAGCAAATACAAAGA	22	1	NM_153035	-	2707	2728	1	22	20	6C8A6	2	transcription elongation factor A (SII) N-terminal and central domain containing 2 (TCEANC2), mRNA
362769	AGGGCTATTAGAGCTAGATCT	21	1	NM_012395	+	3585	3605	1	21	19	13C2G4	2	cyclin-dependent kinase 14 (CDK14), mRNA
367432	ACAACAGAATCAAAGATCAAT	21	1	NM_004080	+	3590	3610	1	21	19	6G8A5	2	diacylglycerol kinase, beta 90kDa (DGKB), transcript variant 1, mRNA
371542	ATATATTCCTGTGTTTCTGAT	21	1	NM_002040	+	2849	2868	2	21	19	9G10	2	GA binding protein transcription factor, alpha subunit 60kDa (GABPA), transcript variant 1, mRNA
371542	ATATATTCCTGTGTTTCTGAT	21	1	NM_001197297	+	2412	2431	2	21	19	9G10	2	GA binding protein transcription factor, alpha subunit 60kDa (GABPA), transcript variant 2, mRNA
374418	CTCCAATTCTGTCTGAAGTTT	21	1	NM_173544	+	2190	2210	1	21	19	4A10A5	2	family with sequence similarity 129, member C (FAM129C), transcript variant 1, mRNA
376486	TACCAGAAATACAAACATCTG	21	1	NR_028456	-	3167	3187	1	21	19	5G9C5	2	ataxin 3 (ATXN3), transcript variant i, non-coding RNA
376486	TACCAGAAATACAAACATCTG	21	1	NR_028457	-	3423	3443	1	21	19	5G9C5	2	ataxin 3 (ATXN3), transcript variant k, non-coding RNA
376486	TACCAGAAATACAAACATCTG	21	1	NR_028458	-	3267	3287	1	21	19	5G9C5	2	ataxin 3 (ATXN3), transcript variant l, non-coding RNA
376486	TACCAGAAATACAAACATCTG	21	1	NR_028459	-	3418	3438	1	21	19	5G9C5	2	ataxin 3 (ATXN3), transcript variant m, non-coding RNA
376486	TACCAGAAATACAAACATCTG	21	1	NR_028460	-	2793	2813	1	21	19	5G9C5	2	ataxin 3 (ATXN3), transcript variant n, non-coding RNA
376486	TACCAGAAATACAAACATCTG	21	1	NR_028461	-	3276	3296	1	21	19	5G9C5	2	ataxin 3 (ATXN3), transcript variant p, non-coding RNA
376486	TACCAGAAATACAAACATCTG	21	1	NR_028462	-	3255	3275	1	21	19	5G9C5	2	ataxin 3 (ATXN3), transcript variant q, non-coding RNA
376486	TACCAGAAATACAAACATCTG	21	1	NR_028463	-	2967	2987	1	21	19	5G9C5	2	ataxin 3 (ATXN3), transcript variant t, non-coding RNA
376844	ATGTCTGGTCTAAAACTGTTC	21	1	NM_002790	+	1258	1277	1	20	19	7G12	2	proteasome (prosome, macropain) subunit, alpha type, 5 (PSMA5), transcript variant 1, mRNA
376844	ATGTCTGGTCTAAAACTGTTC	21	1	NM_001199773	+	1166	1185	1	20	19	7G12	2	proteasome (prosome, macropain) subunit, alpha type, 5 (PSMA5), transcript variant 3, mRNA
376844	ATGTCTGGTCTAAAACTGTTC	21	1	NM_001199774	+	1178	1197	1	20	19	7G12	2	proteasome (prosome, macropain) subunit, alpha type, 5 (PSMA5), transcript variant 4, mRNA
376844	ATGTCTGGTCTAAAACTGTTC	21	1	NM_001199772	+	1191	1210	1	20	19	7G12	2	proteasome (prosome, macropain) subunit, alpha type, 5 (PSMA5), transcript variant 2, mRNA
377695	TTCCATTTCGTTAGCTTTCTT	21	1	NM_018279	+	661	680	1	20	19	2C17	2	transmembrane protein 19 (TMEM19), mRNA
378601	TGTCAGTTGAAAATATGTCTG	21	1	NM_005245	-	2782	2802	1	21	19	5G8A6	2	FAT tumor suppressor homolog 1 (Drosophila) (FAT1), mRNA
385625	AGGAGACAAAACCTTCAAATG	21	1	NM_152354	+	1020	1040	1	21	19	10A3T6	2	zinc finger protein 285 (ZNF285), mRNA
385625	AGGAGACAAAACCTTCAAATG	21	1	NM_032453	+	1422	1442	1	21	19	6C3A10	2	zinc finger protein 527 (ZNF527), mRNA
386448	CAGACATATTTTCAACTGACAG	22	1	NM_005245	+	2782	2803	1	22	20	6T8C6	2	FAT tumor suppressor homolog 1 (Drosophila) (FAT1), mRNA
386467	CAAAAAGCAAGTCTAAGGAGC	21	1	NM_001254943	+	6199	6219	1	21	19	9A5A5	2	coiled-coil domain containing 88A (CCDC88A), transcript variant 3, mRNA
386467	CAAAAAGCAAGTCTAAGGAGC	21	1	NM_001135597	+	6421	6441	1	21	19	9A5A5	2	coiled-coil domain containing 88A (CCDC88A), transcript variant 1, mRNA
386467	CAAAAAGCAAGTCTAAGGAGC	21	1	NM_018084	+	6340	6360	1	21	19	9A5A5	2	coiled-coil domain containing 88A (CCDC88A), transcript variant 2, mRNA
386543	AACATTGATCTTTTTCAGGGC	21	1	NM_002285	+	4044	4064	1	21	19	4T9T6	2	AF4/FMR2 family, member 3 (AFF3), transcript variant 1, mRNA
386543	AACATTGATCTTTTTCAGGGC	21	1	NM_001025108	+	4027	4047	1	21	19	4T9T6	2	AF4/FMR2 family, member 3 (AFF3), transcript variant 2, mRNA
386855	TAATACATTTTTTGTTTGGAA	21	1	NM_001130103	+	2892	2910	1	19	19	19	2	collagen, type XIII, alpha 1 (COL13A1), transcript variant 1, mRNA
386855	TAATACATTTTTTGTTTGGAA	21	1	NM_080801	+	2826	2844	1	19	19	19	2	collagen, type XIII, alpha 1 (COL13A1), transcript variant 5, mRNA
386855	TAATACATTTTTTGTTTGGAA	21	1	NM_080805	+	2571	2589	1	19	19	19	2	collagen, type XIII, alpha 1 (COL13A1), transcript variant 19, mRNA
386855	TAATACATTTTTTGTTTGGAA	21	1	NM_080802	+	2745	2763	1	19	19	19	2	collagen, type XIII, alpha 1 (COL13A1), transcript variant 15, mRNA
386855	TAATACATTTTTTGTTTGGAA	21	1	NM_080800	+	2799	2817	1	19	19	19	2	collagen, type XIII, alpha 1 (COL13A1), transcript variant 11, mRNA
386855	TAATACATTTTTTGTTTGGAA	21	1	NM_080798	+	2676	2694	1	19	19	19	2	collagen, type XIII, alpha 1 (COL13A1), transcript variant 21, mRNA
390855	GTTTTGTTTTTTATCTGAACT	21	1	NM_004356	+	1080	1100	1	21	19	11TA8	2	CD81 molecule (CD81), mRNA
391827	TGTCAGTGGCTCCAATCCTGTC	22	1	NR_036634	+	708	729	1	22	20	8G4A8	2	transforming growth factor, beta receptor III (TGFBR3), transcript variant 4, non-coding RNA
391827	TGTCAGTGGCTCCAATCCTGTC	22	1	NM_001195684	+	447	468	1	22	20	8G4A8	2	transforming growth factor, beta receptor III (TGFBR3), transcript variant 3, mRNA
391827	TGTCAGTGGCTCCAATCCTGTC	22	1	NM_003243	+	611	632	1	22	20	8G4A8	2	transforming growth factor, beta receptor III (TGFBR3), transcript variant 1, mRNA
391827	TGTCAGTGGCTCCAATCCTGTC	22	1	NM_001195683	+	611	632	1	22	20	8G4A8	2	transforming growth factor, beta receptor III (TGFBR3), transcript variant 2, mRNA
392091	ATTTCTCTATACTTTCTCTGT	21	1	NM_001162490	-	1060	1079	2	21	19	7A12	2	ADP-ribosylation factor-like 13A (ARL13A), transcript variant 1, mRNA
395883	TTTCTTTGGACAGTATGGGAC	21	1	NM_198460	+	800	819	1	20	19	15T4	2	guanylate binding protein family, member 6 (GBP6), mRNA
398019	TCAATGAATGCTTGAGATCTA	21	1	NM_022473	-	3755	3775	1	21	19	6A3C10	2	zinc finger protein 106 homolog (mouse) (ZFP106), mRNA
399063	ATGCCAAAGTAGAAATAATTC	21	1	NM_033026	+	10920	10939	1	20	19	7A12	2	piccolo (presynaptic cytomatrix protein) (PCLO), transcript variant 1, mRNA
399063	ATGCCAAAGTAGAAATAATTC	21	1	NM_014510	+	10920	10939	1	20	19	7A12	2	piccolo (presynaptic cytomatrix protein) (PCLO), transcript variant 2, mRNA
400141	TTGGGAATTATGTCTTTTTCT	21	1	NM_005816	+	3109	3129	1	21	19	4GA15	2	CD96 molecule (CD96), transcript variant 2, mRNA
400141	TTGGGAATTATGTCTTTTTCT	21	1	NM_198196	+	3157	3177	1	21	19	4GA15	2	CD96 molecule (CD96), transcript variant 1, mRNA
406701	TCCTGATATATAGCCAAGACAA	22	1	NM_001792	+	764	785	1	22	20	11AG9	2	cadherin 2, type 1, N-cadherin (neuronal) (CDH2), mRNA
410468	ACCAGGTTCTGATCTTCCTCA	21	1	NM_001410	-	10253	10273	1	21	19	5GT14	2	multiple EGF-like-domains 8 (MEGF8), mRNA
411221	TCTTTGTATTTGCTGGTCCAGT	22	1	NM_153035	+	2707	2728	1	22	20	6T8G6	2	transcription elongation factor A (SII) N-terminal and central domain containing 2 (TCEANC2), mRNA
414048	ATTAAAACTGGCAAGACCCTC	21	1	NM_199342	-	477	496	2	21	19	13G6	2	coiled-coil domain containing 23 (CCDC23), mRNA
416079	CTTCATCAAAGGCATCTTCTT	21	1	NM_015346	+	4877	4896	1	20	19	10G9	2	zinc finger, FYVE domain containing 26 (ZFYVE26), mRNA
416838	TTTTCATAAGGAACCTCTTCA	21	1	NM_198450	+	4933	4953	1	21	19	10G2C7	2	apolipoprotein O-like (APOOL), mRNA
418041	CAATATCTTCAGAATAGGCTA	21	1	NM_022781	-	2750	2769	2	21	19	16G3	2	ring finger protein 38 (RNF38), transcript variant 1, mRNA
418041	CAATATCTTCAGAATAGGCTA	21	1	NM_194328	-	2917	2936	2	21	19	16G3	2	ring finger protein 38 (RNF38), transcript variant 2, mRNA
418041	CAATATCTTCAGAATAGGCTA	21	1	NM_194329	-	2600	2619	2	21	19	16G3	2	ring finger protein 38 (RNF38), transcript variant 3, mRNA
418041	CAATATCTTCAGAATAGGCTA	21	1	NM_194330	-	2648	2667	2	21	19	16G3	2	ring finger protein 38 (RNF38), transcript variant 5, mRNA
418041	CAATATCTTCAGAATAGGCTA	21	1	NM_194332	-	2767	2786	2	21	19	16G3	2	ring finger protein 38 (RNF38), transcript variant 6, mRNA
421827	AACAAAAACAAAATAAGGCTG	21	1	NM_002469	-	1069	1088	1	20	19	14A5	2	myogenic factor 6 (herculin) (MYF6), mRNA
421827	AACAAAAACAAAATAAGGCTG	21	1	NM_003319	+	81858	81878	1	21	19	5A10G4	2	titin (TTN), transcript variant N2-B, mRNA
424133	AGATTTGACATTTTCTACTGC	21	1	NM_173518	-	163	182	1	20	19	16A3	2	chromosome 8 open reading frame 45 (C8orf45), transcript variant 1, mRNA
424133	AGATTTGACATTTTCTACTGC	21	1	NM_001136160	-	128	147	1	20	19	16A3	2	chromosome 8 open reading frame 45 (C8orf45), transcript variant 2, mRNA
424133	AGATTTGACATTTTCTACTGC	21	1	NM_001136161	-	163	182	1	20	19	16A3	2	chromosome 8 open reading frame 45 (C8orf45), transcript variant 3, mRNA
426057	CTTTCAATATCTTCAGAATAG	21	1	NM_001127510	-	3148	3168	1	21	19	6AT13	2	adenomatous polyposis coli (APC), transcript variant 2, mRNA
426057	CTTTCAATATCTTCAGAATAG	21	1	NM_000038	-	3040	3060	1	21	19	6AT13	2	adenomatous polyposis coli (APC), transcript variant 3, mRNA
426057	CTTTCAATATCTTCAGAATAG	21	1	NM_001127511	-	3114	3134	1	21	19	6AT13	2	adenomatous polyposis coli (APC), transcript variant 1, mRNA
426468	ATCTTAGATTCTTTCTTTTTG	21	1	NM_006828	-	1907	1927	1	21	19	6G4T9	2	activating signal cointegrator 1 complex subunit 3 (ASCC3), transcript variant 1, mRNA
428819	ATCCACAATCTCTTTGATCTG	21	1	NM_001098512	-	559	579	1	21	19	12T1T6	2	protein kinase, cGMP-dependent, type I (PRKG1), transcript variant 1, mRNA
428819	ATCCACAATCTCTTTGATCTG	21	1	NM_006258	-	493	513	1	21	19	12T1T6	2	protein kinase, cGMP-dependent, type I (PRKG1), transcript variant 2, mRNA
432087	AAGATAGATTTTGCCAGGGGA	21	1	NR_024418	-	1185	1205	1	21	19	4T6T9	2	uncharacterized LOC389332 (LOC389332), non-coding RNA
432601	TACTTTTGCTTCTTGAATCAG	21	1	NM_003356	-	1420	1440	1	21	19	5T2C12	2	uncoupling protein 3 (mitochondrial, proton carrier) (UCP3), nuclear gene encoding mitochondrial protein, transcript variant long, mRNA
434995	GATGAGATTTTTAAAACTACT	21	1	NM_000028	-	5162	5181	2	21	19	16T3	2	amylo-alpha-1, 6-glucosidase, 4-alpha-glucanotransferase (AGL), transcript variant 4, mRNA
434995	GATGAGATTTTTAAAACTACT	21	1	NM_000645	-	4895	4914	2	21	19	16T3	2	amylo-alpha-1, 6-glucosidase, 4-alpha-glucanotransferase (AGL), transcript variant 5, mRNA
434995	GATGAGATTTTTAAAACTACT	21	1	NM_000646	-	4895	4914	2	21	19	16T3	2	amylo-alpha-1, 6-glucosidase, 4-alpha-glucanotransferase (AGL), transcript variant 6, mRNA
434995	GATGAGATTTTTAAAACTACT	21	1	NM_000643	-	4882	4901	2	21	19	16T3	2	amylo-alpha-1, 6-glucosidase, 4-alpha-glucanotransferase (AGL), transcript variant 3, mRNA
434995	GATGAGATTTTTAAAACTACT	21	1	NM_000644	-	4822	4841	2	21	19	16T3	2	amylo-alpha-1, 6-glucosidase, 4-alpha-glucanotransferase (AGL), transcript variant 2, mRNA
434995	GATGAGATTTTTAAAACTACT	21	1	NM_000642	-	5084	5103	2	21	19	16T3	2	amylo-alpha-1, 6-glucosidase, 4-alpha-glucanotransferase (AGL), transcript variant 1, mRNA
435408	GTGGGAATTCATTATGAAGTG	21	1	NR_027715	-	792	812	1	21	19	7T3T9	2	uncharacterized LOC80094 (FLJ14107), non-coding RNA
438926	AGTAGATAGAGAGCAAGCATC	21	1	NM_170692	+	5006	5026	1	21	19	5A6G8	2	RAS protein activator like 2 (RASAL2), transcript variant 2, mRNA
438926	AGTAGATAGAGAGCAAGCATC	21	1	NM_004841	+	3944	3964	1	21	19	5A6G8	2	RAS protein activator like 2 (RASAL2), transcript variant 1, mRNA
440585	TGAAGTACACCATCAAGCAAAT	22	1	NM_017886	-	965	986	1	22	20	7CA13	2	unc-51-like kinase 4 (C. elegans) (ULK4), mRNA
441594	AATTTACAGTTCTGTTGTTGC	21	1	NM_138333	-	2140	2160	1	21	19	4T5T10	2	family with sequence similarity 122A (FAM122A), mRNA
446249	GAAGGTTTTGTCTCCTGCTCAG	22	1	NM_003352	-	153	174	1	22	20	10T6C4	2	SMT3 suppressor of mif two 3 homolog 1 (S. cerevisiae) (SUMO1), transcript variant 1, mRNA
446249	GAAGGTTTTGTCTCCTGCTCAG	22	1	NM_001005781	-	153	174	1	22	20	10T6C4	2	SMT3 suppressor of mif two 3 homolog 1 (S. cerevisiae) (SUMO1), transcript variant 2, mRNA
446249	GAAGGTTTTGTCTCCTGCTCAG	22	1	NR_002190	-	141	162	1	22	20	10T6C4	2	SUMO1 pseudogene 3 (SUMO1P3), non-coding RNA
449848	TTACCTCTTATTGCTTCAGTTG	22	1	NM_001164386	-	3871	3892	1	22	20	5T6G9	2	Rap guanine nucleotide exchange factor (GEF) 6 (RAPGEF6), transcript variant 1, mRNA
449848	TTACCTCTTATTGCTTCAGTTG	22	1	NM_001164387	-	3886	3907	1	22	20	5T6G9	2	Rap guanine nucleotide exchange factor (GEF) 6 (RAPGEF6), transcript variant 3, mRNA
449848	TTACCTCTTATTGCTTCAGTTG	22	1	NM_001164388	-	3871	3892	1	22	20	5T6G9	2	Rap guanine nucleotide exchange factor (GEF) 6 (RAPGEF6), transcript variant 4, mRNA
449848	TTACCTCTTATTGCTTCAGTTG	22	1	NM_001164389	-	3847	3868	1	22	20	5T6G9	2	Rap guanine nucleotide exchange factor (GEF) 6 (RAPGEF6), transcript variant 5, mRNA
449848	TTACCTCTTATTGCTTCAGTTG	22	1	NM_016340	-	3847	3868	1	22	20	5T6G9	2	Rap guanine nucleotide exchange factor (GEF) 6 (RAPGEF6), transcript variant 2, mRNA
450459	TTGGTTTGAATTATGATTTCT	21	1	NM_020648	+	1227	1247	1	21	19	3G1T15	2	twisted gastrulation homolog 1 (Drosophila) (TWSG1), mRNA
455089	CGAAGTTGTCATGTGTTCTTA	21	1	NM_018965	-	973	992	2	21	19	10T9	2	triggering receptor expressed on myeloid cells 2 (TREM2), mRNA
459261	AGCAGATTTGCACAATGATGGT	22	1	NM_001151	-	3645	3665	2	22	20	4A16	2	solute carrier family 25 (mitochondrial carrier; adenine nucleotide translocator), member 4 (SLC25A4), nuclear gene encoding mitochondrial protein, mRNA
459700	TTCATCTGTTTCAACAACCTC	21	1	NM_018227	-	2451	2470	1	20	19	11C8	2	ubiquitin-like modifier activating enzyme 6 (UBA6), mRNA
459734	GTGTATGCGATTTTGCTGATG	21	1	NM_005277	+	491	511	1	21	19	7CG12	2	glycoprotein M6A (GPM6A), transcript variant 1, mRNA
459734	GTGTATGCGATTTTGCTGATG	21	1	NM_201591	+	1084	1104	1	21	19	7CG12	2	glycoprotein M6A (GPM6A), transcript variant 2, mRNA
459734	GTGTATGCGATTTTGCTGATG	21	1	NM_201592	+	432	452	1	21	19	7CG12	2	glycoprotein M6A (GPM6A), transcript variant 3, mRNA
460788	TTTTCAAAGCACTCAACATGAA	22	1	NM_019050	-	5467	5488	1	22	20	14AA6	2	ubiquitin specific peptidase 53 (USP53), mRNA
464453	CTTTTTCTTGGAGCTGGAATT	21	1	NM_012311	-	1099	1119	1	21	19	7T3A9	2	KIN, antigenic determinant of recA protein homolog (mouse) (KIN), transcript variant 1, mRNA
464453	CTTTTTCTTGGAGCTGGAATT	21	1	NR_045609	-	1099	1119	1	21	19	7T3A9	2	KIN, antigenic determinant of recA protein homolog (mouse) (KIN), transcript variant 3, non-coding RNA
464453	CTTTTTCTTGGAGCTGGAATT	21	1	NR_045610	-	1004	1024	1	21	19	7T3A9	2
465019	CTTCTTCCTCTTCTTCAACTGA	22	1	NM_015934	-	1551	1570	1	20	20	20	2	NOP58 ribonucleoprotein homolog (yeast) (NOP58), mRNA
465019	CTTCTTCCTCTTCTTCAACTGA	22	1	NM_001008779	-	413	433	1	21	20	7C13	2	speedy homolog A (Xenopus laevis) (SPDYA), transcript variant 2, mRNA
465019	CTTCTTCCTCTTCTTCAACTGA	22	1	NM_001142634	-	527	547	1	21	20	7C13	2	speedy homolog A (Xenopus laevis) (SPDYA), transcript variant 3, mRNA
465019	CTTCTTCCTCTTCTTCAACTGA	22	1	NM_182756	-	601	621	1	21	20	7C13	2	speedy homolog A (Xenopus laevis) (SPDYA), transcript variant 1, mRNA
465612	ATAGCCTATTCTGAAGATATT	21	1	NM_022781	+	2750	2769	2	21	19	3C16	2	ring finger protein 38 (RNF38), transcript variant 1, mRNA
465612	ATAGCCTATTCTGAAGATATT	21	1	NM_194328	+	2917	2936	2	21	19	3C16	2	ring finger protein 38 (RNF38), transcript variant 2, mRNA
465612	ATAGCCTATTCTGAAGATATT	21	1	NM_194329	+	2600	2619	2	21	19	3C16	2	ring finger protein 38 (RNF38), transcript variant 3, mRNA
465612	ATAGCCTATTCTGAAGATATT	21	1	NM_194330	+	2648	2667	2	21	19	3C16	2	ring finger protein 38 (RNF38), transcript variant 5, mRNA
465612	ATAGCCTATTCTGAAGATATT	21	1	NM_194332	+	2767	2786	2	21	19	3C16	2	ring finger protein 38 (RNF38), transcript variant 6, mRNA
465707	GACAAAGCTCAGCAGGATGGG	21	1	NM_172239	-	1703	1722	1	20	19	2C17	2	REX1, RNA exonuclease 1 homolog (S. cerevisiae)-like 1 (REXO1L1), mRNA
465707	GACAAAGCTCAGCAGGATGGG	21	1	NR_003594	-	719	738	1	20	19	2C17	2	REX1, RNA exonuclease 1 homolog (S. cerevisiae)-like 2 (pseudogene) (REXO1L2P), non-coding RNA
468424	ATTGCATCATGTCTTCAGAGT	21	1	NM_014159	+	2688	2708	1	21	19	5A4G10	2	SET domain containing 2 (SETD2), mRNA
470160	CTTGAGGTTTATGATGATTCTG	22	1	NM_152282	+	2589	2610	1	22	20	5G13C2	2	acid phosphatase-like 2 (ACPL2), transcript variant 1, mRNA
470160	CTTGAGGTTTATGATGATTCTG	22	1	NM_001037172	+	2415	2436	1	22	20	5G13C2	2	acid phosphatase-like 2 (ACPL2), transcript variant 2, mRNA
475943	AAAAATTGATGCAGGCTGTTT	21	1	NM_052939	-	2523	2543	1	21	19	5T2A12	2	Fc receptor-like 3 (FCRL3), mRNA
476061	AACCACAACTCCTCCTTATTT	21	1	NM_015902	-	7489	7509	1	21	19	6A9T4	2	ubiquitin protein ligase E3 component n-recognin 5 (UBR5), mRNA
477174	AGTGGAGACAATAAAATAAGAG	22	1	NM_001012241	-	3394	3415	1	22	20	2T2A16	2	male-specific lethal 1 homolog (Drosophila) (MSL1), mRNA
478751	CATAAAGCTCCTCTGATACTTT	22	1	NM_005335	-	303	324	1	22	20	3A1A16	2	hematopoietic cell-specific Lyn substrate 1 (HCLS1), mRNA
483362	TCTTATTTTATTGTCTCCACTT	22	1	NM_001012241	+	3395	3416	1	22	20	15T2A3	2	male-specific lethal 1 homolog (Drosophila) (MSL1), mRNA
484459	TGGATAGGGCTGTGGATGAGG	21	1	NM_025233	+	1916	1936	1	21	19	5A9A5	2	CoA synthase (COASY), nuclear gene encoding mitochondrial protein, transcript variant 1, mRNA
484459	TGGATAGGGCTGTGGATGAGG	21	1	NM_001042529	+	1524	1544	1	21	19	5A9A5	2	CoA synthase (COASY), nuclear gene encoding mitochondrial protein, transcript variant 2, mRNA
484459	TGGATAGGGCTGTGGATGAGG	21	1	NM_001042530	+	1780	1800	1	21	19	5A9A5	2	CoA synthase (COASY), nuclear gene encoding mitochondrial protein, transcript variant 3, mRNA
484459	TGGATAGGGCTGTGGATGAGG	21	1	NM_001042531	+	1203	1223	1	21	19	5A9A5	2	CoA synthase (COASY), nuclear gene encoding mitochondrial protein, transcript variant 5, mRNA
484459	TGGATAGGGCTGTGGATGAGG	21	1	NM_001042532	+	1656	1676	1	21	19	5A9A5	2	CoA synthase (COASY), nuclear gene encoding mitochondrial protein, transcript variant 4, mRNA
485237	TGACCAGAACTTCCACAGAAA	21	1	NM_017848	-	3561	3581	1	21	19	13CA6	2	family with sequence similarity 120C (FAM120C), transcript variant 1, mRNA
489162	TAGAATCTGATATAAAACATT	21	1	NM_001160046	+	3169	3188	1	20	19	11A8	2	shugoshin-like 2 (S. pombe) (SGOL2), transcript variant 3, mRNA
489162	TAGAATCTGATATAAAACATT	21	1	NM_152524	+	3169	3188	1	20	19	11A8	2	shugoshin-like 2 (S. pombe) (SGOL2), transcript variant 1, mRNA
489162	TAGAATCTGATATAAAACATT	21	1	NM_001160033	+	3169	3188	1	20	19	11A8	2	shugoshin-like 2 (S. pombe) (SGOL2), transcript variant 2, mRNA
489509	GCCACTGACATGACCTTCAGA	21	1	NM_002471	+	1701	1719	1	19	19	19	2	myosin, heavy chain 6, cardiac muscle, alpha (MYH6), mRNA
493201	ATGGTGGCAAAAAGAAAGACT	21	1	NM_145246	+	461	481	1	21	19	13GA6	2	fragile site, folic acid type, rare, fra(10)(q23.3) or fra(10)(q24.2) candidate 1 (FRA10AC1), mRNA
497186	TTGTCTTGGCTATATATCAGG	21	1	NM_001792	-	765	785	1	21	19	9CT10	2	cadherin 2, type 1, N-cadherin (neuronal) (CDH2), mRNA
497658	AATCAAGCTTTGGGCAAAGTG	21	1	NM_198271	+	3199	3219	1	21	19	15A1A3	2	leiomodin 3 (fetal) (LMOD3), mRNA
498551	AGAGCCGTTGTCTATATTAGG	21	1	NM_001167672	+	16055	16075	1	21	19	8T4A7	2	LIM domain containing preferred translocation partner in lipoma (LPP), transcript variant 3, mRNA
498551	AGAGCCGTTGTCTATATTAGG	21	1	NM_005578	+	16586	16606	1	21	19	8T4A7	2	LIM domain containing preferred translocation partner in lipoma (LPP), transcript variant 1, mRNA
498551	AGAGCCGTTGTCTATATTAGG	21	1	NM_001167671	+	16529	16549	1	21	19	8T4A7	2	LIM domain containing preferred translocation partner in lipoma (LPP), transcript variant 2, mRNA
501377	TAGGAAAACAATCTGTGGTTG	21	1	NM_207014	+	1061	1080	2	21	19	2G17	2	WD repeat domain 78 (WDR78), transcript variant 2, mRNA
501377	TAGGAAAACAATCTGTGGTTG	21	1	NM_024763	+	1061	1080	2	21	19	2G17	2	WD repeat domain 78 (WDR78), transcript variant 1, mRNA
502206	ATATCATCAAAAATAGGGATA	21	1	NM_198151	-	1100	1120	1	21	19	4C11G4	2	HEPACAM family member 2 (HEPACAM2), transcript variant 2, mRNA
502206	ATATCATCAAAAATAGGGATA	21	1	NM_001039372	-	1096	1116	1	21	19	4C11G4	2	HEPACAM family member 2 (HEPACAM2), transcript variant 1, mRNA
503196	CCAGCATTCACATCCTTATCT	21	1	NR_024086	+	1814	1834	1	21	19	10C5T4	2	COPG2 imprinted transcript 1 (non-protein coding) (COPG2IT1), non-coding RNA
503277	AAGGCTTGAATTCTTTTGGATT	22	1	NM_020940	+	3018	3039	1	22	20	2G5A13	2	family with sequence similarity 160, member B1 (FAM160B1), transcript variant 1, mRNA
505859	TTATCTGTCTTCTGTTTATCA	21	1	NM_024607	+	4139	4158	2	21	19	17T2	2	protein phosphatase 1, regulatory subunit 3B (PPP1R3B), transcript variant 2, mRNA
505859	TTATCTGTCTTCTGTTTATCA	21	1	NM_001201329	+	4287	4306	2	21	19	17T2	2	protein phosphatase 1, regulatory subunit 3B (PPP1R3B), transcript variant 1, mRNA
507311	GAAGGTCATGTCAGTGGCTCC	21	1	NM_001702	-	2521	2541	1	21	19	4G1C14	2	brain-specific angiogenesis inhibitor 1 (BAI1), mRNA
507663	ATTTGTTTCTGGATTGTGTTC	21	1	NM_014818	+	158	178	1	21	19	4G6G9	2	tripartite motif containing 66 (TRIM66), mRNA
508195	CCAAGTTCATGAATCCAGTAA	21	1	NM_172070	-	7408	7427	2	21	19	15A4	2	ubiquitin protein ligase E3 component n-recognin 3 (putative) (UBR3), mRNA
508704	TTTGGGCATTCTCATTTTGGA	21	1	NM_004586	-	6384	6404	1	21	19	10C5T4	2	ribosomal protein S6 kinase, 90kDa, polypeptide 3 (RPS6KA3), mRNA
508828	GCATTCAACTTCAAGACTTTT	21	1	NM_014139	+	4792	4810	3	21	19	19	2	sodium channel, voltage-gated, type XI, alpha subunit (SCN11A), mRNA
509806	TTCTTGGAGCTGGAATTGGTC	21	1	NM_001018037	+	5338	5358	1	21	19	6GA13	2	vacuolar protein sorting 13 homolog A (S. cerevisiae) (VPS13A), transcript variant C, mRNA
509806	TTCTTGGAGCTGGAATTGGTC	21	1	NM_033305	+	5455	5475	1	21	19	6GA13	2	vacuolar protein sorting 13 homolog A (S. cerevisiae) (VPS13A), transcript variant A, mRNA
509806	TTCTTGGAGCTGGAATTGGTC	21	1	NM_001018038	+	5455	5475	1	21	19	6GA13	2	vacuolar protein sorting 13 homolog A (S. cerevisiae) (VPS13A), transcript variant D, mRNA
509806	TTCTTGGAGCTGGAATTGGTC	21	1	NM_015186	+	5455	5475	1	21	19	6GA13	2	vacuolar protein sorting 13 homolog A (S. cerevisiae) (VPS13A), transcript variant B, mRNA
518396	AATTTGAGGGTCTTGCCAGTTT	22	1	NM_001040274	+	1920	1941	1	22	20	8GG12	2	synaptonemal complex protein 2-like (SYCP2L), mRNA
519964	TCACACATCTTTTGCACAAGT	21	1	NM_005236	+	2712	2732	1	21	19	6A9C4	2	excision repair cross-complementing rodent repair deficiency, complementation group 4 (ERCC4), mRNA
520005	TAACAGAAATGTCCATGAATG	21	1	NM_007072	-	1922	1942	1	21	19	12CC7	2	HERV-H LTR-associating 2 (HHLA2), mRNA
522300	AAATAAGGAGGAGTTGTGGTT	21	1	NM_015902	+	7489	7509	1	21	19	4A9T6	2	ubiquitin protein ligase E3 component n-recognin 5 (UBR5), mRNA
526600	TTTCTTCACCTGATCTTCATT	21	1	NM_173516	-	538	558	1	21	19	7A4A8	2	poly(A)-specific ribonuclease (PARN)-like domain containing 1 (PNLDC1), mRNA
529922	CTTCATTTCAGAAAGCCTGACA	22	1	NM_004363	+	2248	2269	1	22	20	11A3C6	2	carcinoembryonic antigen-related cell adhesion molecule 5 (CEACAM5), mRNA
532185	ATTTCAGTCACAAATTTCAGC	21	1	NM_018427	-	2027	2047	1	21	19	2T15A2	2	RRN3 RNA polymerase I transcription factor homolog (S. cerevisiae) (RRN3), mRNA
535321	AACCTCTCTTTCTCTGGTATG	21	1	NM_025142	+	8961	8981	1	21	19	6T9G4	2	TAO kinase 1 (TAOK1), transcript variant 2, mRNA
535321	AACCTCTCTTTCTCTGGTATG	21	1	NM_020791	+	9405	9425	1	21	19	6T9G4	2	TAO kinase 1 (TAOK1), transcript variant 1, mRNA
536877	AGATGCCAAAGTAGAAATAAT	21	1	NM_033026	+	10919	10938	2	21	19	8A11	2	piccolo (presynaptic cytomatrix protein) (PCLO), transcript variant 1, mRNA
536877	AGATGCCAAAGTAGAAATAAT	21	1	NM_014510	+	10919	10938	2	21	19	8A11	2	piccolo (presynaptic cytomatrix protein) (PCLO), transcript variant 2, mRNA
537188	TAATTGTTGGGAAAAGTGACT	21	1	NM_001201366	+	1678	1696	3	21	19	19	2	dynein, axonemal, light chain 1 (DNAL1), transcript variant 2, mRNA
537188	TAATTGTTGGGAAAAGTGACT	21	1	NM_031427	+	1632	1650	3	21	19	19	2	dynein, axonemal, light chain 1 (DNAL1), transcript variant 1, mRNA
537344	CTGTTTTTTAATCTGCTTCTC	21	1	NM_002892	-	1839	1859	1	21	19	12C1G6	2	AT rich interactive domain 4A (RBP1-like) (ARID4A), transcript variant 1, mRNA
537344	CTGTTTTTTAATCTGCTTCTC	21	1	NM_023000	-	1839	1859	1	21	19	12C1G6	2	AT rich interactive domain 4A (RBP1-like) (ARID4A), transcript variant 2, mRNA
537344	CTGTTTTTTAATCTGCTTCTC	21	1	NM_023001	-	1839	1859	1	21	19	12C1G6	2	AT rich interactive domain 4A (RBP1-like) (ARID4A), transcript variant 3, mRNA
539044	TCTCTGTGTTTTCCTCTTGTG	21	1	NM_014109	-	765	785	1	21	19	3C1G15	2	ATPase family, AAA domain containing 2 (ATAD2), mRNA
539066	TCTTCTGATGAAAAGCTTGCTT	22	1	NM_175907	+	881	902	1	22	20	15CT5	2	zinc binding alcohol dehydrogenase domain containing 2 (ZADH2), mRNA
541080	TCCCATACTGTCCAAAGAAAC	21	1	NM_198460	-	800	819	1	20	19	4A15	2	guanylate binding protein family, member 6 (GBP6), mRNA
542311	TATCATCATCCACAATCTCTT	21	1	NM_080588	+	304	323	1	20	19	4A15	2	protein tyrosine phosphatase, non-receptor type 7 (PTPN7), transcript variant 2, mRNA
542674	CCAAAGATAATGTAGAAAGTG	21	1	NM_004063	+	2570	2589	2	21	19	12A7	2	cadherin 17, LI cadherin (liver-intestine) (CDH17), transcript variant 1, mRNA
542674	CCAAAGATAATGTAGAAAGTG	21	1	NM_001144663	+	2571	2590	2	21	19	12A7	2	cadherin 17, LI cadherin (liver-intestine) (CDH17), transcript variant 2, mRNA
544324	ATTTCGTGGAGCTTAGGAGGGA	22	1	NM_007053	-	978	999	1	22	20	4CG16	2	CD160 molecule (CD160), mRNA
545776	TGGCAACTGTGGATGTCAAGA	21	1	NM_013248	+	389	409	1	21	19	5A8G6	2	NTF2-like export factor 1 (NXT1), mRNA
546268	GATGCTTGCTCTCTATCTACT	21	1	NM_170692	-	5006	5026	1	21	19	8C6T5	2	RAS protein activator like 2 (RASAL2), transcript variant 2, mRNA
546268	GATGCTTGCTCTCTATCTACT	21	1	NM_004841	-	3944	3964	1	21	19	8C6T5	2	RAS protein activator like 2 (RASAL2), transcript variant 1, mRNA
546738	AATAAATATGGCTGTCAGGTC	21	1	NM_002813	-	2193	2213	1	21	19	4AA15	2	proteasome (prosome, macropain) 26S subunit, non-ATPase, 9 (PSMD9), mRNA
550513	TCAGCCAAGTCTGCTCTGTCCC	22	1	NM_002027	-	248	269	1	22	20	6A1G13	2	farnesyltransferase, CAAX box, alpha (FNTA), transcript variant 1, mRNA
550513	TCAGCCAAGTCTGCTCTGTCCC	22	1	NM_138428	-	5089	5110	1	22	20	9T7G4	2	chromosome 1 open reading frame 212 (C1orf212), transcript variant 3, mRNA
550513	TCAGCCAAGTCTGCTCTGTCCC	22	1	NM_001164824	-	5339	5360	1	22	20	9T7G4	2	chromosome 1 open reading frame 212 (C1orf212), transcript variant 1, mRNA
550513	TCAGCCAAGTCTGCTCTGTCCC	22	1	NM_001164825	-	5232	5253	1	22	20	9T7G4	2	chromosome 1 open reading frame 212 (C1orf212), transcript variant 2, mRNA
551273	GAAGATTTATATAAAAGTACT	21	1	NM_004540	-	4387	4407	1	21	19	2A2T15	2	neural cell adhesion molecule 2 (NCAM2), mRNA
551273	GAAGATTTATATAAAAGTACT	21	1	NM_133443	-	3434	3454	1	21	19	11T4G4	2	glutamic pyruvate transaminase (alanine aminotransferase) 2 (GPT2), transcript variant 1, mRNA
551273	GAAGATTTATATAAAAGTACT	21	1	NM_001142466	-	3350	3370	1	21	19	11T4G4	2	glutamic pyruvate transaminase (alanine aminotransferase) 2 (GPT2), transcript variant 2, mRNA
553054	TAAAAAAAGAATTCTAAAAAA	21	1	NM_003081	+	1601	1620	2	21	19	12C7	2	synaptosomal-associated protein, 25kDa (SNAP25), transcript variant 1, mRNA
553054	TAAAAAAAGAATTCTAAAAAA	21	1	NM_130811	+	1601	1620	2	21	19	12C7	2	synaptosomal-associated protein, 25kDa (SNAP25), transcript variant 2, mRNA
553054	TAAAAAAAGAATTCTAAAAAA	21	1	NM_006609	-	8543	8563	1	21	19	7AG12	2	mitogen-activated protein kinase kinase kinase 2 (MAP3K2), mRNA
553793	TTGTCTCCACTTATAGATATGG	22	1	NM_022970	+	3201	3222	1	22	20	12A2G6	2	fibroblast growth factor receptor 2 (FGFR2), transcript variant 2, mRNA
553793	TTGTCTCCACTTATAGATATGG	22	1	NM_000141	+	3198	3219	1	22	20	12A2G6	2	fibroblast growth factor receptor 2 (FGFR2), transcript variant 1, mRNA
553793	TTGTCTCCACTTATAGATATGG	22	1	NM_001144914	+	2365	2386	1	22	20	12A2G6	2	fibroblast growth factor receptor 2 (FGFR2), transcript variant 4, mRNA
553793	TTGTCTCCACTTATAGATATGG	22	1	NM_001144916	+	2647	2668	1	22	20	12A2G6	2	fibroblast growth factor receptor 2 (FGFR2), transcript variant 6, mRNA
553793	TTGTCTCCACTTATAGATATGG	22	1	NM_001144917	+	2850	2871	1	22	20	12A2G6	2	fibroblast growth factor receptor 2 (FGFR2), transcript variant 7, mRNA
553793	TTGTCTCCACTTATAGATATGG	22	1	NM_001144918	+	2847	2868	1	22	20	12A2G6	2	fibroblast growth factor receptor 2 (FGFR2), transcript variant 8, mRNA
558322	TTATTTTGTTTATTATTAAGC	21	1	NM_001001132	-	4287	4307	1	21	19	15TT4	2	intersectin 1 (SH3 domain protein) (ITSN1), transcript variant 2, mRNA
558322	TTATTTTGTTTATTATTAAGC	21	1	NM_015368	+	2629	2649	1	21	19	13TA6	2	pannexin 1 (PANX1), mRNA
558701	CTGCTTTTAAGCAAGTTCTGCA	22	1	NM_001008224	+	129	150	1	22	20	5T4G11	2	uveal autoantigen with coiled-coil domains and ankyrin repeats (UACA), transcript variant 2, mRNA
562401	TTTTTGTTTGGTTTTTGATTT	21	1	NM_018410	+	2364	2383	1	20	19	9G10	2	Holliday junction recognition protein (HJURP), mRNA
564643	CAACTGAAGCAATAAGAGGTA	21	1	NM_001164386	+	3871	3891	1	21	19	9C6A4	2	Rap guanine nucleotide exchange factor (GEF) 6 (RAPGEF6), transcript variant 1, mRNA
564643	CAACTGAAGCAATAAGAGGTA	21	1	NM_001164387	+	3886	3906	1	21	19	9C6A4	2	Rap guanine nucleotide exchange factor (GEF) 6 (RAPGEF6), transcript variant 3, mRNA
564643	CAACTGAAGCAATAAGAGGTA	21	1	NM_001164388	+	3871	3891	1	21	19	9C6A4	2	Rap guanine nucleotide exchange factor (GEF) 6 (RAPGEF6), transcript variant 4, mRNA
564643	CAACTGAAGCAATAAGAGGTA	21	1	NM_001164389	+	3847	3867	1	21	19	9C6A4	2	Rap guanine nucleotide exchange factor (GEF) 6 (RAPGEF6), transcript variant 5, mRNA
564643	CAACTGAAGCAATAAGAGGTA	21	1	NM_016340	+	3847	3867	1	21	19	9C6A4	2	Rap guanine nucleotide exchange factor (GEF) 6 (RAPGEF6), transcript variant 2, mRNA
565191	TTAGCGAGGAGGATGCAAAGG	21	1	NM_003013	-	691	710	2	21	19	8A11	2	secreted frizzled-related protein 2 (SFRP2), mRNA
565487	CTAGAAGACAAAATGAAAAAG	21	1	NM_005907	+	2043	2062	1	20	19	3G16	2	mannosidase, alpha, class 1A, member 1 (MAN1A1), mRNA
570071	TTTCTCAGTCTGAAACCACCTG	22	1	NR_015425	+	898	919	1	22	20	6AG14	2	uncharacterized LOC338588 (LOC338588), non-coding RNA
570817	TTGGTTATTTATGCTACTATA	21	1	NM_032012	+	2970	2990	1	21	19	8T4C7	2	chromosome 9 open reading frame 5 (C9orf5), mRNA
574207	ATCAATGATGTTTTCTGATTT	21	1	NR_037941	-	2120	2140	1	21	19	10T5G4	2	syntaxin 16 (STX16), transcript variant 6, non-coding RNA
574207	ATCAATGATGTTTTCTGATTT	21	1	NR_037942	-	1513	1533	1	21	19	10T5G4	2	syntaxin 16 (STX16), transcript variant 7, non-coding RNA
574207	ATCAATGATGTTTTCTGATTT	21	1	NR_037943	-	1470	1490	1	21	19	10T5G4	2	syntaxin 16 (STX16), transcript variant 8, non-coding RNA
574207	ATCAATGATGTTTTCTGATTT	21	1	NM_001001433	-	2334	2354	1	21	19	10T5G4	2	syntaxin 16 (STX16), transcript variant 1, mRNA
574207	ATCAATGATGTTTTCTGATTT	21	1	NM_001134772	-	2322	2342	1	21	19	10T5G4	2	syntaxin 16 (STX16), transcript variant 3, mRNA
574207	ATCAATGATGTTTTCTGATTT	21	1	NM_001134773	-	2283	2303	1	21	19	10T5G4	2	syntaxin 16 (STX16), transcript variant 4, mRNA
574207	ATCAATGATGTTTTCTGATTT	21	1	NM_001204868	-	1696	1716	1	21	19	10T5G4	2	syntaxin 16 (STX16), transcript variant 5, mRNA
574207	ATCAATGATGTTTTCTGATTT	21	1	NM_003763	-	2271	2291	1	21	19	10T5G4	2	syntaxin 16 (STX16), transcript variant 2, mRNA
580206	AATTTGGGTTTTGTTTTTGTT	21	1	NM_170741	+	2988	3007	2	21	19	5G14	2	potassium inwardly-rectifying channel, subfamily J, member 16 (KCNJ16), transcript variant 2, mRNA
580206	AATTTGGGTTTTGTTTTTGTT	21	1	NM_170742	+	3076	3095	2	21	19	5G14	2	potassium inwardly-rectifying channel, subfamily J, member 16 (KCNJ16), transcript variant 3, mRNA
580206	AATTTGGGTTTTGTTTTTGTT	21	1	NM_018658	+	3069	3088	2	21	19	5G14	2	potassium inwardly-rectifying channel, subfamily J, member 16 (KCNJ16), transcript variant 1, mRNA
580424	AAATATGTCTGGTCTAAAACTG	22	1	NM_017818	+	1634	1655	1	22	20	8C4C8	2	WD repeat containing, antisense to TP73 (WRAP73), mRNA
580635	AAGGAGCATTTCTTATCTGGAA	22	1	NM_001040616	-	475	496	1	22	20	10T3A7	2	lines homolog (Drosophila) (LINS), transcript variant 6, mRNA
583661	TAGTTATCTAAGAGGGGAAGAA	22	1	NM_001039937	-	1288	1308	2	22	20	3T17	2	integrator complex subunit 6 (INTS6), transcript variant 2, mRNA
583661	TAGTTATCTAAGAGGGGAAGAA	22	1	NM_012141	-	1780	1800	2	22	20	3T17	2	integrator complex subunit 6 (INTS6), transcript variant 1, mRNA
595321	GGTTCCCTTTATTCCTCCAAT	21	1	NR_027034	+	1306	1324	2	20	19	19	2	uncharacterized LOC150381 (LOC150381), non-coding RNA
595692	CAGAGCCACAGATGCCAAAGT	21	1	NM_133638	+	2891	2911	1	21	19	13G1C5	2	ADAM metallopeptidase with thrombospondin type 1 motif, 19 (ADAMTS19), mRNA
595908	TTATCTGTCTTCTGTTTATCAC	22	1	NM_024607	+	4139	4159	2	22	20	17T3	2	protein phosphatase 1, regulatory subunit 3B (PPP1R3B), transcript variant 2, mRNA
595908	TTATCTGTCTTCTGTTTATCAC	22	1	NM_001201329	+	4287	4307	2	22	20	17T3	2	protein phosphatase 1, regulatory subunit 3B (PPP1R3B), transcript variant 1, mRNA
595998	TTCTGTGGAAGTTCTGGTCAA	21	1	NM_017848	+	3562	3582	1	21	19	5TG14	2	family with sequence similarity 120C (FAM120C), transcript variant 1, mRNA
598396	TCGGCGGCAGAAACACTCGTC	21	1	NR_038897	-	1428	1448	1	21	19	5G5A9	2	uncharacterized LOC285084 (LOC285084), non-coding RNA
599466	TTCATCGAAGGCTGAGTAGTA	21	1	NM_018426	-	1550	1570	1	21	19	4TC15	2	transmembrane protein 63B (TMEM63B), mRNA
602174	TTGAAAAATCTTTATAGCTTG	21	1	NM_004402	-	3002	3021	1	20	19	15A4	2	DNA fragmentation factor, 40kDa, beta polypeptide (caspase-activated DNase) (DFFB), mRNA
607109	AGAAATTTTAATTTCTCCCCT	21	1	NM_145660	+	2027	2046	1	20	19	2A17	2	apolipoprotein L, 4 (APOL4), transcript variant b, mRNA
607109	AGAAATTTTAATTTCTCCCCT	21	1	NM_030643	+	2216	2235	1	20	19	2A17	2	apolipoprotein L, 4 (APOL4), transcript variant a, mRNA
610012	AAAGAATGGAATAAGCAAGGT	21	1	NM_001105570	-	1896	1914	1	19	19	19	2	nudix (nucleoside diphosphate linked moiety X)-type motif 19 (NUDT19), nuclear gene encoding mitochondrial protein, mRNA
610076	ATGAGCAGTATTTCTTTGAAA	21	1	NM_006854	+	1259	1279	1	21	19	6A6C7	2	KDEL (Lys-Asp-Glu-Leu) endoplasmic reticulum protein retention receptor 2 (KDELR2), transcript variant 1, mRNA
610076	ATGAGCAGTATTTCTTTGAAA	21	1	NM_001100603	+	1006	1026	1	21	19	6A6C7	2	KDEL (Lys-Asp-Glu-Leu) endoplasmic reticulum protein retention receptor 2 (KDELR2), transcript variant 2, mRNA
611529	TTTAAACTTACTCCAAGCTTC	21	1	NM_032511	-	790	810	1	21	19	6C1T12	2	failed axon connections homolog (Drosophila) (FAXC), mRNA
613285	ACAACACACAGAAAGCAAACT	21	1	NM_177556	-	2246	2265	1	20	19	3A16	2	trophinin (TRO), transcript variant 2, mRNA
613285	ACAACACACAGAAAGCAAACT	21	1	NM_016157	-	2261	2280	1	20	19	3A16	2	trophinin (TRO), transcript variant 3, mRNA
613285	ACAACACACAGAAAGCAAACT	21	1	NM_001039705	-	4582	4601	1	20	19	3A16	2	trophinin (TRO), transcript variant 6, mRNA
614112	AAAAAGAATTCTAAAAAAAGA	21	1	NM_001195150	+	3286	3305	2	21	19	7T12	2	uncharacterized LOC100130705 (LOC100130705), mRNA
614112	AAAAAGAATTCTAAAAAAAGA	21	1	NM_052928	+	4038	4058	1	21	19	10C5A4	2	SET and MYND domain containing 4 (SMYD4), mRNA
619708	TTGGGTTTTGTTTTTGTTTTT	21	1	NM_004674	+	1991	2009	3	21	19	19	2	ash2 (absent, small, or homeotic)-like (Drosophila) (ASH2L), transcript variant 1, mRNA
619708	TTGGGTTTTGTTTTTGTTTTT	21	1	NM_001102575	+	2983	3001	3	21	19	19	2	sorting nexin 18 (SNX18), transcript variant 1, mRNA
619708	TTGGGTTTTGTTTTTGTTTTT	21	1	NM_016654	-	2259	2277	3	21	19	19	2	GA binding protein transcription factor, beta subunit 1 (GABPB1), transcript variant beta-2, mRNA
619708	TTGGGTTTTGTTTTTGTTTTT	21	1	NM_005254	-	2295	2313	3	21	19	19	2	GA binding protein transcription factor, beta subunit 1 (GABPB1), transcript variant beta-1, mRNA
619708	TTGGGTTTTGTTTTTGTTTTT	21	1	NM_001105214	+	2054	2072	3	21	19	19	2	ash2 (absent, small, or homeotic)-like (Drosophila) (ASH2L), transcript variant 2, mRNA
619708	TTGGGTTTTGTTTTTGTTTTT	21	1	NM_001145427	+	3140	3158	3	21	19	19	2	sorting nexin 18 (SNX18), transcript variant 3, mRNA
619708	TTGGGTTTTGTTTTTGTTTTT	21	1	NM_006884	+	2850	2868	3	21	19	19	2	short stature homeobox 2 (SHOX2), transcript variant 2, mRNA
619708	TTGGGTTTTGTTTTTGTTTTT	21	1	NM_003030	+	2922	2940	3	21	19	19	2	short stature homeobox 2 (SHOX2), transcript variant 1, mRNA
619708	TTGGGTTTTGTTTTTGTTTTT	21	1	NM_001163678	+	2814	2832	3	21	19	19	2	short stature homeobox 2 (SHOX2), transcript variant 3, mRNA
623437	AGAAACAAAATGATAGGATTC	21	1	NM_001813	+	6959	6978	1	20	19	5C14	2	centromere protein E, 312kDa (CENPE), mRNA
625986	TTCTTTCTTTGTATTTGCTGGT	22	1	NM_001102559	+	477	498	1	22	20	5T5T10	2	phosphatidic acid phosphatase type 2 domain containing 1B (PPAPDC1B), transcript variant 1, mRNA
625986	TTCTTTCTTTGTATTTGCTGGT	22	1	NM_032483	+	477	498	1	22	20	5T5T10	2	phosphatidic acid phosphatase type 2 domain containing 1B (PPAPDC1B), transcript variant 2, mRNA
629199	AGTGGAGACAATAAAATAAGA	21	1	NM_001012241	-	3395	3415	1	21	19	2T2A15	2	male-specific lethal 1 homolog (Drosophila) (MSL1), mRNA
633078	AATCTCTTTGATCTGCTGTGA	21	1	NM_018141	-	1180	1200	1	21	19	3C1C15	2	mitochondrial ribosomal protein S10 (MRPS10), nuclear gene encoding mitochondrial protein, mRNA
634589	TTAATCTGTGTCTTCTTCTTC	21	1	NM_175057	-	1029	1049	1	21	19	9G3T7	2	trace amine associated receptor 9 (gene/pseudogene) (TAAR9), mRNA
635629	TCTGTGTCTTCTTCTTCATCA	21	1	NM_025126	-	813	833	1	21	19	4T2C13	2	ring finger protein 34 (RNF34), transcript variant 2, mRNA
635629	TCTGTGTCTTCTTCTTCATCA	21	1	NM_194271	-	879	899	1	21	19	4T2C13	2	ring finger protein 34 (RNF34), transcript variant 1, mRNA
639928	ACCCACAGTGGTGAGAAACTA	21	1	NM_030634	+	1108	1126	1	19	19	19	2	zinc finger protein 436 (ZNF436), transcript variant 2, mRNA
639928	ACCCACAGTGGTGAGAAACTA	21	1	NM_001077195	+	1286	1304	1	19	19	19	2	zinc finger protein 436 (ZNF436), transcript variant 1, mRNA
641440	TGTTTATTTTCTTTCTTTACT	21	1	NM_001080534	+	6885	6904	1	20	19	10C9	2	unc-13 homolog C (C. elegans) (UNC13C), mRNA
641440	TGTTTATTTTCTTTCTTTACT	21	1	NM_016529	-	4547	4566	1	20	19	5A14	2	ATPase, aminophospholipid transporter, class I, type 8A, member 2 (ATP8A2), mRNA
641440	TGTTTATTTTCTTTCTTTACT	21	1	NR_039980	-	1073	1093	1	21	19	10C3C6	2	uncharacterized LOC286437 (LOC286437), non-coding RNA
643463	TTCATGTTGAGTGCTTTGAAA	21	1	NM_019050	+	5467	5487	1	21	19	6TT13	2	ubiquitin specific peptidase 53 (USP53), mRNA
645669	TTCTCTAAGTTCATATCTTGC	21	1	NM_024755	-	2589	2608	1	20	19	14A5	2	SAFB-like, transcription modulator (SLTM), transcript variant 1, mRNA
645669	TTCTCTAAGTTCATATCTTGC	21	1	NM_001013843	-	2535	2554	1	20	19	14A5	2	SAFB-like, transcription modulator (SLTM), transcript variant 2, mRNA
646468	GTCTGAGGCTGCTTGTCACAA	21	1	NM_203405	-	787	807	1	21	19	13T1T5	2	keratin associated protein 26-1 (KRTAP26-1), mRNA
651468	TAGATGCTTGCTCTCTATCTAC	22	1	NM_170692	-	5007	5028	1	22	20	10C6T4	2	RAS protein activator like 2 (RASAL2), transcript variant 2, mRNA
651468	TAGATGCTTGCTCTCTATCTAC	22	1	NM_004841	-	3945	3966	1	22	20	10C6T4	2	RAS protein activator like 2 (RASAL2), transcript variant 1, mRNA
651577	TCCAGATAAGAAATGCTCCTT	21	1	NM_001040616	+	476	496	1	21	19	6T3A10	2	lines homolog (Drosophila) (LINS), transcript variant 6, mRNA
653058	AAGAAGAAATAAAAGAAAGGAT	22	1	NM_002792	+	836	857	1	22	20	9T9G2	2	proteasome (prosome, macropain) subunit, alpha type, 7 (PSMA7), mRNA
656149	TTCATTAACATAGGGGCTTTG	21	1	NM_017554	+	7374	7394	1	21	19	13G2C4	2	poly (ADP-ribose) polymerase family, member 14 (PARP14), mRNA
656207	GCAAAGTCTATCTTCCAGGAA	21	1	NM_001145065	-	5152	5170	3	21	19	19	2	family with sequence similarity 190, member A (FAM190A), transcript variant 1, mRNA
659161	CAATTCACTGTATCTTGTAGAA	22	1	NM_001163147	-	1951	1972	1	22	20	6A10T4	2	ets variant 1 (ETV1), transcript variant 2, mRNA
659161	CAATTCACTGTATCTTGTAGAA	22	1	NM_001163148	-	1759	1780	1	22	20	6A10T4	2	ets variant 1 (ETV1), transcript variant 3, mRNA
659161	CAATTCACTGTATCTTGTAGAA	22	1	NM_001163151	-	1642	1663	1	22	20	6A10T4	2	ets variant 1 (ETV1), transcript variant 6, mRNA
659161	CAATTCACTGTATCTTGTAGAA	22	1	NM_004956	-	2217	2238	1	22	20	6A10T4	2	ets variant 1 (ETV1), transcript variant 1, mRNA
659161	CAATTCACTGTATCTTGTAGAA	22	1	NM_001163149	-	1630	1651	1	22	20	6A10T4	2	ets variant 1 (ETV1), transcript variant 4, mRNA
659161	CAATTCACTGTATCTTGTAGAA	22	1	NM_001163152	-	1507	1528	1	22	20	6A10T4	2	ets variant 1 (ETV1), transcript variant 7, mRNA
659161	CAATTCACTGTATCTTGTAGAA	22	1	NM_001163150	-	1696	1717	1	22	20	6A10T4	2	ets variant 1 (ETV1), transcript variant 5, mRNA
659752	TATCCCTATTTTTGATGATATT	22	1	NM_212482	+	4190	4211	1	22	20	15T3A2	2	fibronectin 1 (FN1), transcript variant 1, mRNA
660386	GCTGGGAGGTAGCTTACCTCT	21	1	NM_183416	-	2305	2325	1	21	19	15AC4	2	kinesin family member 1B (KIF1B), transcript variant 2, mRNA
662805	TCCCTTTGTCCCCACAGAAAA	21	1	NM_001039567	-	482	501	1	20	19	17A2	2	ribosomal protein S4, Y-linked 2 (RPS4Y2), mRNA
663174	AATATGTCTGGTCTAAAACTG	21	1	NM_017818	+	1635	1655	1	21	19	7C4C8	2	WD repeat containing, antisense to TP73 (WRAP73), mRNA
663603	ATTCTTTGAATAAAATTGATT	21	1	NM_014733	+	5271	5290	1	20	19	15T4	2	zinc finger, FYVE domain containing 16 (ZFYVE16), transcript variant 1, mRNA
663603	ATTCTTTGAATAAAATTGATT	21	1	NM_001105251	+	5399	5418	1	20	19	15T4	2	zinc finger, FYVE domain containing 16 (ZFYVE16), transcript variant 2, mRNA
663603	ATTCTTTGAATAAAATTGATT	21	1	NM_001205	+	1198	1218	1	21	19	4T9A6	2	BCL2/adenovirus E1B 19kDa interacting protein 1 (BNIP1), transcript variant BNIP1, mRNA
663603	ATTCTTTGAATAAAATTGATT	21	1	NM_013979	+	1327	1347	1	21	19	4T9A6	2	BCL2/adenovirus E1B 19kDa interacting protein 1 (BNIP1), transcript variant BNIP1-b, mRNA
663603	ATTCTTTGAATAAAATTGATT	21	1	NM_013978	+	1096	1116	1	21	19	4T9A6	2	BCL2/adenovirus E1B 19kDa interacting protein 1 (BNIP1), transcript variant BNIP1-a, mRNA
663603	ATTCTTTGAATAAAATTGATT	21	1	NM_013980	+	1225	1245	1	21	19	4T9A6	2	BCL2/adenovirus E1B 19kDa interacting protein 1 (BNIP1), transcript variant BNIP1-c, mRNA
664599	AAATATTTCTTATGTTGGGCA	21	1	NM_006713	+	2341	2361	1	21	19	13G2G4	2	SUB1 homolog (S. cerevisiae) (SUB1), mRNA
664827	TCAAAAAGAAAGAATCTAAGAT	22	1	NM_006828	+	1906	1927	1	22	20	10A4C6	2	activating signal cointegrator 1 complex subunit 3 (ASCC3), transcript variant 1, mRNA
665845	TTTCTTTTCCATGTTTTCTTC	21	1	NM_017934	-	4953	4972	1	20	19	2T17	2	pleckstrin homology domain interacting protein (PHIP), mRNA
668557	GATGAGGAAGAGCTGAGAGCCT	22	1	NM_139319	+	2024	2045	1	22	20	16G1G3	2	solute carrier family 17 (sodium-dependent inorganic phosphate cotransporter), member 8 (SLC17A8), transcript variant 1, mRNA
668557	GATGAGGAAGAGCTGAGAGCCT	22	1	NM_001145288	+	1874	1895	1	22	20	16G1G3	2	solute carrier family 17 (sodium-dependent inorganic phosphate cotransporter), member 8 (SLC17A8), transcript variant 2, mRNA
669504	ATTTTCATCAAGATAGCTATCA	22	1	NM_000780	-	1290	1310	2	22	20	14G6	2	cytochrome P450, family 7, subfamily A, polypeptide 1 (CYP7A1), mRNA
669504	ATTTTCATCAAGATAGCTATCA	22	1	NM_001244683	-	4298	4319	1	22	20	4T10G6	2	phosphodiesterase 3A, cGMP-inhibited (PDE3A), transcript variant 2, mRNA
669504	ATTTTCATCAAGATAGCTATCA	22	1	NM_000921	-	5041	5062	1	22	20	4T10G6	2	phosphodiesterase 3A, cGMP-inhibited (PDE3A), transcript variant 1, mRNA
669671	TTTTTTCAAAACTTGGGGACCA	22	1	NM_001650	+	3844	3865	1	22	20	3T2C15	2	aquaporin 4 (AQP4), transcript variant a, mRNA
669671	TTTTTTCAAAACTTGGGGACCA	22	1	NM_004028	+	3764	3785	1	22	20	3T2C15	2	aquaporin 4 (AQP4), transcript variant b, mRNA
672170	TTGAAGATTTTAAGGTAGATA	21	1	NM_152585	-	1837	1856	2	21	19	4G15	2	RNA binding motif protein, Y-linked, family 1, member F (RBMY1F), mRNA
672170	TTGAAGATTTTAAGGTAGATA	21	1	NM_001006117	-	1836	1855	2	21	19	4G15	2	RNA binding motif protein, Y-linked, family 1, member J (RBMY1J), mRNA
672170	TTGAAGATTTTAAGGTAGATA	21	1	NM_005058	-	1843	1862	2	21	19	4G15	2	RNA binding motif protein, Y-linked, family 1, member A1 (RBMY1A1), mRNA
672170	TTGAAGATTTTAAGGTAGATA	21	1	NM_001006118	-	1837	1856	2	21	19	4G15	2	RNA binding motif protein, Y-linked, family 1, member E (RBMY1E), mRNA
672170	TTGAAGATTTTAAGGTAGATA	21	1	NM_001006120	-	1837	1856	2	21	19	4G15	2	RNA binding motif protein, Y-linked, family 1, member D (RBMY1D), mRNA
672170	TTGAAGATTTTAAGGTAGATA	21	1	NM_001006121	-	1877	1896	2	21	19	4G15	2	RNA binding motif protein, Y-linked, family 1, member B (RBMY1B), mRNA
672941	AAAAAGTCTTGAAGTTGAATG	21	1	NM_014139	-	4792	4810	2	20	19	19	2	sodium channel, voltage-gated, type XI, alpha subunit (SCN11A), mRNA
673600	CTATAAAGATTTTTCAAAACTT	22	1	NM_001040100	-	1389	1410	1	22	20	14C4C2	2	serine palmitoyltransferase, small subunit B (SPTSSB), mRNA
674206	TTGAAAAAATAGAATTGAGCTC	22	1	NM_138817	-	331	352	1	22	20	4A7A9	2	solute carrier family 7 (anionic amino acid transporter), member 13 (SLC7A13), mRNA
678619	GTAGAAAATGTCAAATCTGAG	21	1	NM_001099270	+	2978	2997	1	20	19	11C8	2	zinc finger and BTB domain containing 34 (ZBTB34), mRNA
679609	GTGACAAAGCTCAGCAGGATG	21	1	NM_172239	-	1704	1723	2	21	19	3C16	2	REX1, RNA exonuclease 1 homolog (S. cerevisiae)-like 1 (REXO1L1), mRNA
679609	GTGACAAAGCTCAGCAGGATG	21	1	NR_003594	-	720	739	2	21	19	3C16	2	REX1, RNA exonuclease 1 homolog (S. cerevisiae)-like 2 (pseudogene) (REXO1L2P), non-coding RNA
679738	TTTGTGATTCACCCAGAGCTGA	22	1	NM_001199295	+	3386	3406	1	21	20	17G3	2	zinc finger protein 549 (ZNF549), transcript variant 1, mRNA
679738	TTTGTGATTCACCCAGAGCTGA	22	1	NM_153263	+	3347	3367	1	21	20	17G3	2	zinc finger protein 549 (ZNF549), transcript variant 2, mRNA
680731	ATTCATCATTTGCAAACAAGA	21	1	NM_014612	-	2365	2384	1	20	19	2T17	2	family with sequence similarity 120A (FAM120A), mRNA
682308	CAAAAAGCAAGTCTAAGGAGCA	22	1	NM_001254943	+	6199	6220	1	22	20	9A5A6	2	coiled-coil domain containing 88A (CCDC88A), transcript variant 3, mRNA
682308	CAAAAAGCAAGTCTAAGGAGCA	22	1	NM_001135597	+	6421	6442	1	22	20	9A5A6	2	coiled-coil domain containing 88A (CCDC88A), transcript variant 1, mRNA
682308	CAAAAAGCAAGTCTAAGGAGCA	22	1	NM_018084	+	6340	6361	1	22	20	9A5A6	2	coiled-coil domain containing 88A (CCDC88A), transcript variant 2, mRNA
682490	TCTGGTCTTGCATCTTTCTTG	21	1	NM_000616	-	170	190	1	21	19	5T5A9	2	CD4 molecule (CD4), transcript variant 1, mRNA
682490	TCTGGTCTTGCATCTTTCTTG	21	1	NM_001195015	-	170	190	1	21	19	5T5A9	2	CD4 molecule (CD4), transcript variant 3, mRNA
682490	TCTGGTCTTGCATCTTTCTTG	21	1	NM_001195014	-	170	190	1	21	19	5T5A9	2	CD4 molecule (CD4), transcript variant 2, mRNA
682490	TCTGGTCTTGCATCTTTCTTG	21	1	NM_001195016	-	170	190	1	21	19	5T5A9	2	CD4 molecule (CD4), transcript variant 4, mRNA
682490	TCTGGTCTTGCATCTTTCTTG	21	1	NM_001195017	-	170	190	1	21	19	5T5A9	2	CD4 molecule (CD4), transcript variant 5, mRNA
686439	GACAGAACTCAGGGCAATTGT	21	1	NM_183378	-	940	960	1	21	19	15AA4	2	ovochymase 1 (OVCH1), mRNA
689052	TGATTTTTGTTTGATTTTTGTT	22	1	NM_022900	+	3627	3648	1	22	20	2A16G2	2	CAS1 domain containing 1 (CASD1), mRNA
693438	AACAAAAACAAAACCCAAATTT	22	1	NR_027473	-	6859	6879	1	21	20	15C5	2	lysine (K)-specific demethylase 2A (KDM2A), transcript variant 2, non-coding RNA
693438	AACAAAAACAAAACCCAAATTT	22	1	NM_012308	-	7311	7331	1	21	20	15C5	2	lysine (K)-specific demethylase 2A (KDM2A), transcript variant 1, mRNA
693438	AACAAAAACAAAACCCAAATTT	22	1	NM_001256405	-	5303	5323	1	21	20	15C5	2	lysine (K)-specific demethylase 2A (KDM2A), transcript variant 3, mRNA
693853	TGAAATAATGCTCATCTTCTT	21	1	NM_001077244	-	441	460	2	21	19	8G11	2	glutamate receptor, ionotrophic, AMPA 4 (GRIA4), transcript variant 3, mRNA
693853	TGAAATAATGCTCATCTTCTT	21	1	NM_000829	-	441	460	2	21	19	8G11	2	glutamate receptor, ionotrophic, AMPA 4 (GRIA4), transcript variant 1, mRNA
693853	TGAAATAATGCTCATCTTCTT	21	1	NM_001077243	-	441	460	2	21	19	8G11	2	glutamate receptor, ionotrophic, AMPA 4 (GRIA4), transcript variant 2, mRNA
693853	TGAAATAATGCTCATCTTCTT	21	1	NM_001112812	-	309	328	2	21	19	8G11	2	glutamate receptor, ionotrophic, AMPA 4 (GRIA4), transcript variant 4, mRNA
697747	TAAAAATAGAGCCAAAAGTTG	21	1	NM_018321	+	986	1006	1	21	19	5AT14	2	BRX1, biogenesis of ribosomes, homolog (S. cerevisiae) (BRIX1), mRNA
698914	CTGGTTCCCTTTATTCCTCCA	21	1	NM_001130157	-	657	676	1	20	19	6C13	2	myeloid leukemia factor 1 (MLF1), transcript variant 2, mRNA
698914	CTGGTTCCCTTTATTCCTCCA	21	1	NM_001130156	-	584	603	1	20	19	6C13	2	myeloid leukemia factor 1 (MLF1), transcript variant 3, mRNA
698914	CTGGTTCCCTTTATTCCTCCA	21	1	NM_022443	-	540	559	1	20	19	6C13	2	myeloid leukemia factor 1 (MLF1), transcript variant 1, mRNA
698914	CTGGTTCCCTTTATTCCTCCA	21	1	NM_001195432	-	859	878	1	20	19	6C13	2	myeloid leukemia factor 1 (MLF1), transcript variant 4, mRNA
698914	CTGGTTCCCTTTATTCCTCCA	21	1	NM_001195434	-	702	721	1	20	19	6C13	2	myeloid leukemia factor 1 (MLF1), transcript variant 6, mRNA
701732	TTTTTGTTTTTTGTTTGGTTT	21	1	NM_001561	+	1366	1384	1	19	19	19	2	tumor necrosis factor receptor superfamily, member 9 (TNFRSF9), mRNA
702205	CTTCTCCTGGAAGTTGGTTCC	21	1	NM_173468	-	1896	1916	1	21	19	6C9G4	2	MOB kinase activator 1B (MOB1B), transcript variant 2, mRNA
702205	CTTCTCCTGGAAGTTGGTTCC	21	1	NM_001244766	-	2008	2028	1	21	19	6C9G4	2	MOB kinase activator 1B (MOB1B), transcript variant 1, mRNA
704778	CCTGAAATTGTAGTTATCTCTT	22	1	NM_015447	+	7564	7585	1	22	20	15A2T3	2	calmodulin regulated spectrin-associated protein 1 (CAMSAP1), mRNA
704778	CCTGAAATTGTAGTTATCTCTT	22	1	NM_017759	+	10794	10815	1	22	20	6A8A6	2	INO80 complex subunit D (INO80D), mRNA
709197	CCTGATTCGTCTTGTTCTTCA	21	1	NM_004996	-	1629	1649	1	21	19	6T7T6	2	ATP-binding cassette, sub-family C (CFTR/MRP), member 1 (ABCC1), transcript variant 1, mRNA
709197	CCTGATTCGTCTTGTTCTTCA	21	1	NM_019900	-	1629	1649	1	21	19	6T7T6	2	ATP-binding cassette, sub-family C (CFTR/MRP), member 1 (ABCC1), transcript variant 5, mRNA
709197	CCTGATTCGTCTTGTTCTTCA	21	1	NM_019862	-	1629	1649	1	21	19	6T7T6	2	ATP-binding cassette, sub-family C (CFTR/MRP), member 1 (ABCC1), transcript variant 2, mRNA
709197	CCTGATTCGTCTTGTTCTTCA	21	1	NM_019899	-	1629	1649	1	21	19	6T7T6	2	ATP-binding cassette, sub-family C (CFTR/MRP), member 1 (ABCC1), transcript variant 4, mRNA
709197	CCTGATTCGTCTTGTTCTTCA	21	1	NM_019898	-	1629	1649	1	21	19	6T7T6	2	ATP-binding cassette, sub-family C (CFTR/MRP), member 1 (ABCC1), transcript variant 3, mRNA
710228	AGAAGAAATAAAAGAAAGGATT	22	1	NM_001127510	+	4105	4126	1	22	20	2A14G4	2	adenomatous polyposis coli (APC), transcript variant 2, mRNA
710228	AGAAGAAATAAAAGAAAGGATT	22	1	NM_000038	+	3997	4018	1	22	20	2A14G4	2	adenomatous polyposis coli (APC), transcript variant 3, mRNA
710228	AGAAGAAATAAAAGAAAGGATT	22	1	NM_001127511	+	4071	4092	1	22	20	2A14G4	2	adenomatous polyposis coli (APC), transcript variant 1, mRNA
710744	AAATCTTCTTTATTTTCTATTT	22	1	NM_031303	-	2805	2826	1	22	20	7C9T4	2	katanin p60 subunit A-like 2 (KATNAL2), mRNA
712770	CAAGAAATTTTCAAAGCACTC	21	1	NM_019050	-	1430	1450	1	21	19	3G1A15	2	ubiquitin specific peptidase 53 (USP53), mRNA
713454	TCTTATTTTATTGTCTCCACT	21	1	NM_001012241	+	3395	3415	1	21	19	15T2A2	2	male-specific lethal 1 homolog (Drosophila) (MSL1), mRNA
713968	TTACTGGATTCATGAACTTGG	21	1	NM_172070	+	7408	7427	1	20	19	4T15	2	ubiquitin protein ligase E3 component n-recognin 3 (putative) (UBR3), mRNA
717486	TTGAAACCTATTGCTGGGATG	21	1	NM_025047	-	310	330	1	21	19	13CT6	2	ADP-ribosylation factor-like 14 (ARL14), mRNA
719341	GAAGAGTGTTCTTTTGAGGCTT	22	1	NM_018212	+	6596	6617	1	22	20	7G11C2	2	enabled homolog (Drosophila) (ENAH), transcript variant 2, mRNA
719341	GAAGAGTGTTCTTTTGAGGCTT	22	1	NM_001008493	+	6659	6680	1	22	20	7G11C2	2	enabled homolog (Drosophila) (ENAH), transcript variant 1, mRNA
721899	TGAAGTACACCATCAAGCAAA	21	1	NM_017886	-	966	986	1	21	19	7CA12	2	unc-51-like kinase 4 (C. elegans) (ULK4), mRNA
724907	AGGTCATTGCATAATTTGTTT	21	1	NM_207014	-	890	910	1	21	19	10A4T5	2	WD repeat domain 78 (WDR78), transcript variant 2, mRNA
724907	AGGTCATTGCATAATTTGTTT	21	1	NM_024763	-	890	910	1	21	19	10A4T5	2	WD repeat domain 78 (WDR78), transcript variant 1, mRNA
727933	TCAAAAGGAGCTTGACATTTA	21	1	NM_018086	+	2534	2554	1	21	19	15C2T2	2	fidgetin (FIGN), mRNA
727954	TATTCTTTATTTATTCTCTCA	21	1	NM_007314	+	5108	5128	1	21	19	15C1C3	2	v-abl Abelson murine leukemia viral oncogene homolog 2 (ABL2), transcript variant b, mRNA
727954	TATTCTTTATTTATTCTCTCA	21	1	NM_005158	+	4821	4841	1	21	19	15C1C3	2	v-abl Abelson murine leukemia viral oncogene homolog 2 (ABL2), transcript variant c, mRNA
727954	TATTCTTTATTTATTCTCTCA	21	1	NM_001136000	+	4512	4532	1	21	19	15C1C3	2	v-abl Abelson murine leukemia viral oncogene homolog 2 (ABL2), transcript variant d, mRNA
727954	TATTCTTTATTTATTCTCTCA	21	1	NM_001168236	+	5045	5065	1	21	19	15C1C3	2	v-abl Abelson murine leukemia viral oncogene homolog 2 (ABL2), transcript variant f, mRNA
727954	TATTCTTTATTTATTCTCTCA	21	1	NM_001168237	+	4799	4819	1	21	19	15C1C3	2	v-abl Abelson murine leukemia viral oncogene homolog 2 (ABL2), transcript variant g, mRNA
727954	TATTCTTTATTTATTCTCTCA	21	1	NM_001168238	+	4736	4756	1	21	19	15C1C3	2	v-abl Abelson murine leukemia viral oncogene homolog 2 (ABL2), transcript variant h, mRNA
727954	TATTCTTTATTTATTCTCTCA	21	1	NM_001168239	+	4449	4469	1	21	19	15C1C3	2	v-abl Abelson murine leukemia viral oncogene homolog 2 (ABL2), transcript variant i, mRNA
735185	TTTCTTTTTCCTTTTAATCTTC	22	1	NM_002892	-	708	729	1	22	20	6T8A6	2	AT rich interactive domain 4A (RBP1-like) (ARID4A), transcript variant 1, mRNA
735185	TTTCTTTTTCCTTTTAATCTTC	22	1	NM_023000	-	708	729	1	22	20	6T8A6	2	AT rich interactive domain 4A (RBP1-like) (ARID4A), transcript variant 2, mRNA
735185	TTTCTTTTTCCTTTTAATCTTC	22	1	NM_023001	-	708	729	1	22	20	6T8A6	2	AT rich interactive domain 4A (RBP1-like) (ARID4A), transcript variant 3, mRNA
735261	ATAGAAACATTGCTGCGGAAC	21	1	NM_032139	+	1897	1917	1	21	19	5A10G4	2	ankyrin repeat domain 27 (VPS9 domain) (ANKRD27), mRNA
735646	AAGATCAGAATCTGGTAGCATT	22	1	NR_026851	+	2658	2679	1	22	20	2G4G14	2	family with sequence similarity 75, member D5, pseudogene (FAM75D5), non-coding RNA
735996	CACTGTGAAAATGACTTATGA	21	1	NM_013367	-	1172	1192	1	21	19	4G2A13	2	anaphase promoting complex subunit 4 (ANAPC4), mRNA
737307	TTCCACTGATTCTCATTTCAAA	22	1	NM_014500	-	737	758	1	22	20	6T7A7	2	HIV-1 Tat specific factor 1 (HTATSF1), transcript variant 2, mRNA
737307	TTCCACTGATTCTCATTTCAAA	22	1	NM_001163280	-	986	1007	1	22	20	6T7A7	2	HIV-1 Tat specific factor 1 (HTATSF1), transcript variant 1, mRNA
737626	ATTTCATCCTCAAGCTCCTGCT	22	1	NM_015459	-	1517	1538	1	22	20	5A5A10	2	atlastin GTPase 3 (ATL3), mRNA
737721	CTGGATGAACTCAACAAAAAG	21	1	NM_004342	+	1394	1414	1	21	19	5T8C6	2	caldesmon 1 (CALD1), transcript variant 2, mRNA
737721	CTGGATGAACTCAACAAAAAG	21	1	NM_033138	+	2159	2179	1	21	19	5T8C6	2	caldesmon 1 (CALD1), transcript variant 1, mRNA
737721	CTGGATGAACTCAACAAAAAG	21	1	NM_033139	+	1209	1229	1	21	19	5T8C6	2	caldesmon 1 (CALD1), transcript variant 4, mRNA
737721	CTGGATGAACTCAACAAAAAG	21	1	NM_033140	+	1131	1151	1	21	19	5T8C6	2	caldesmon 1 (CALD1), transcript variant 5, mRNA
737721	CTGGATGAACTCAACAAAAAG	21	1	NM_033157	+	1472	1492	1	21	19	5T8C6	2	caldesmon 1 (CALD1), transcript variant 3, mRNA
738563	CAATCCGGATATTTCTGTGGA	21	1	NM_001002860	-	3140	3159	2	21	19	12T7	2	BTB (POZ) domain containing 7 (BTBD7), transcript variant 1, mRNA
739416	AAAAAAATGTCTGTTGGTATA	21	1	NM_003566	-	6981	7001	1	21	19	7T6T6	2	early endosome antigen 1 (EEA1), mRNA
739749	TCAGAATCATCATCATCCTCTA	22	1	NM_004183	-	1477	1497	1	21	20	3G17	2	bestrophin 1 (BEST1), transcript variant 1, mRNA
739749	TCAGAATCATCATCATCCTCTA	22	1	NM_001139443	-	1289	1309	1	21	20	3G17	2	bestrophin 1 (BEST1), transcript variant 2, mRNA
739825	GATAGAGAAGAATGAGATTGTC	22	1	NM_001012339	+	815	836	1	22	20	2T13A5	2	DnaJ (Hsp40) homolog, subfamily C, member 21 (DNAJC21), transcript variant 2, mRNA
739825	GATAGAGAAGAATGAGATTGTC	22	1	NM_194283	+	815	836	1	22	20	2T13A5	2	DnaJ (Hsp40) homolog, subfamily C, member 21 (DNAJC21), transcript variant 1, mRNA
739979	TTTTCCATGTTTTCTTCATAAG	22	1	NM_014691	-	3138	3158	2	22	20	9T11	2	aquarius homolog (mouse) (AQR), mRNA
745843	AATTGCATCATGTCTTCAGAG	21	1	NM_207412	-	1914	1934	1	21	19	8C2G9	2	chromosome 8 open reading frame 86 (C8orf86), mRNA
750807	AGCAACAACAGAACTGTAAATT	22	1	NM_138333	+	2139	2160	1	22	20	11A5A4	2	family with sequence similarity 122A (FAM122A), mRNA
752436	TGCTTCATTGTTCTGCCATCA	21	1	NR_036489	+	2175	2194	1	20	19	4T15	2	uncharacterized LOC284215 (LOC284215), non-coding RNA
752565	ATTTCGTGGAGCTTAGGAGGG	21	1	NM_007053	-	979	999	1	21	19	4CG15	2	CD160 molecule (CD160), mRNA
757595	CGATCCCAACATGCCATCTGA	21	1	NR_002591	+	9	28	2	21	19	2T17	2	small nucleolar RNA, C/D box 95 (SNORD95), small nucleolar RNA
760206	AAGACTGTGATTTCCAAACTA	21	1	NM_014875	-	3064	3084	1	21	19	2G15C2	2	kinesin family member 14 (KIF14), mRNA
760836	GAGATTATTGATTTTGAATTG	21	1	NM_001128211	+	54	73	2	21	19	15A4	2	NudC domain containing 1 (NUDCD1), transcript variant 2, mRNA
763348	AACATTGATCTTTTTCAGGGCA	22	1	NM_002285	+	4044	4065	1	22	20	4T9T7	2	AF4/FMR2 family, member 3 (AFF3), transcript variant 1, mRNA
763348	AACATTGATCTTTTTCAGGGCA	22	1	NM_001025108	+	4027	4048	1	22	20	4T9T7	2	AF4/FMR2 family, member 3 (AFF3), transcript variant 2, mRNA
764755	CCTTTCTTTTATTTCTTCTTT	21	1	NM_002792	-	835	854	2	21	19	9A10	2	proteasome (prosome, macropain) subunit, alpha type, 7 (PSMA7), mRNA
764755	CCTTTCTTTTATTTCTTCTTT	21	1	NM_005839	-	606	625	2	21	19	4C15	2	serine/arginine repetitive matrix 1 (SRRM1), mRNA
766655	AAGATTTTCTAAGCCCTTGTT	21	1	NM_017423	+	3052	3072	1	21	19	4T4T11	2	UDP-N-acetyl-alpha-D-galactosamine:polypeptide N-acetylgalactosaminyltransferase 7 (GalNAc-T7) (GALNT7), mRNA
766984	ATTTCCTTTCCAATTTTCTAT	21	1	NM_003369	-	882	900	1	19	19	19	2	UV radiation resistance associated gene (UVRAG), mRNA
767489	AAGCTTTCTTTATCTTTATTG	21	1	NM_021110	-	571	589	3	21	19	19	2	collagen, type XIV, alpha 1 (COL14A1), mRNA
774029	TATGTCTGGTCTAAAACTGTT	21	1	NM_002790	+	1258	1277	2	21	19	7G12	2	proteasome (prosome, macropain) subunit, alpha type, 5 (PSMA5), transcript variant 1, mRNA
774029	TATGTCTGGTCTAAAACTGTT	21	1	NM_001199773	+	1166	1185	2	21	19	7G12	2	proteasome (prosome, macropain) subunit, alpha type, 5 (PSMA5), transcript variant 3, mRNA
774029	TATGTCTGGTCTAAAACTGTT	21	1	NM_001199774	+	1178	1197	2	21	19	7G12	2	proteasome (prosome, macropain) subunit, alpha type, 5 (PSMA5), transcript variant 4, mRNA
774029	TATGTCTGGTCTAAAACTGTT	21	1	NM_001199772	+	1191	1210	2	21	19	7G12	2	proteasome (prosome, macropain) subunit, alpha type, 5 (PSMA5), transcript variant 2, mRNA
775499	TTTGAATCTAAGAAAAGCTCAA	22	1	NR_039988	+	647	668	1	22	20	3G2T15	2	uncharacterized LOC100130899 (LOC100130899), non-coding RNA
777640	CCTAGATTCACAAGGGTATGC	21	1	NM_018126	-	6027	6047	1	21	19	8C3A8	2	transmembrane protein 33 (TMEM33), mRNA
781318	TCATCACCATTGACAAAGAAC	21	1	NM_001008781	+	4882	4902	1	21	19	11GA8	2	FAT tumor suppressor homolog 3 (Drosophila) (FAT3), mRNA
782223	ATTTCTGTTCTATTCTAACAA	21	1	NM_018974	+	1698	1718	1	21	19	4C1G14	2	unc-93 homolog A (C. elegans) (UNC93A), transcript variant 1, mRNA
782223	ATTTCTGTTCTATTCTAACAA	21	1	NM_001143947	+	1572	1592	1	21	19	4C1G14	2	unc-93 homolog A (C. elegans) (UNC93A), transcript variant 2, mRNA
783219	TCCTTTCTGGTAGACTTAGAA	21	1	NM_001135170	-	2917	2937	1	21	19	12GA7	2	C1q and tumor necrosis factor related protein 7 (C1QTNF7), transcript variant 1, mRNA
783219	TCCTTTCTGGTAGACTTAGAA	21	1	NM_001135171	-	2864	2884	1	21	19	12GA7	2	C1q and tumor necrosis factor related protein 7 (C1QTNF7), transcript variant 2, mRNA
783219	TCCTTTCTGGTAGACTTAGAA	21	1	NM_031911	-	2747	2767	1	21	19	12GA7	2	C1q and tumor necrosis factor related protein 7 (C1QTNF7), transcript variant 3, mRNA
788560	TTATAAGATTATCAATAGATG	21	1	NM_002293	-	5862	5882	1	21	19	8T6T5	2	laminin, gamma 1 (formerly LAMB2) (LAMC1), mRNA
789953	AGGAGGAAGCAGCAAGAAAGA	21	1	NM_012224	+	1734	1752	3	21	19	19	2	NIMA (never in mitosis gene a)-related kinase 1 (NEK1), transcript variant 2, mRNA
789953	AGGAGGAAGCAGCAAGAAAGA	21	1	NM_001199397	+	1656	1674	3	21	19	19	2	NIMA (never in mitosis gene a)-related kinase 1 (NEK1), transcript variant 1, mRNA
789953	AGGAGGAAGCAGCAAGAAAGA	21	1	NM_001199398	+	1656	1674	3	21	19	19	2	NIMA (never in mitosis gene a)-related kinase 1 (NEK1), transcript variant 3, mRNA
789953	AGGAGGAAGCAGCAAGAAAGA	21	1	NM_001199399	+	1656	1674	3	21	19	19	2	NIMA (never in mitosis gene a)-related kinase 1 (NEK1), transcript variant 4, mRNA
789953	AGGAGGAAGCAGCAAGAAAGA	21	1	NM_001199400	+	1734	1752	3	21	19	19	2	NIMA (never in mitosis gene a)-related kinase 1 (NEK1), transcript variant 5, mRNA
794442	ATCTCAGAATCATCATCATCCT	22	1	NM_004183	-	1479	1499	2	22	20	5G15	2	bestrophin 1 (BEST1), transcript variant 1, mRNA
794442	ATCTCAGAATCATCATCATCCT	22	1	NM_001139443	-	1291	1311	2	22	20	5G15	2	bestrophin 1 (BEST1), transcript variant 2, mRNA
799657	AAATGTTTGGTCATCCACAAT	21	1	NM_152504	+	398	416	1	19	19	19	2	chromosome 20 open reading frame 196 (C20orf196), mRNA
800683	TCTTCTTCCCCTCTTAGATAAC	22	1	NM_001039937	+	1287	1307	2	22	20	18A2	2	integrator complex subunit 6 (INTS6), transcript variant 2, mRNA
800683	TCTTCTTCCCCTCTTAGATAAC	22	1	NM_012141	+	1779	1799	2	22	20	18A2	2	integrator complex subunit 6 (INTS6), transcript variant 1, mRNA
800746	GATGAGTTTGATGAAGAAGAA	21	1	NM_006401	+	911	930	1	20	19	2T17	2	acidic (leucine-rich) nuclear phosphoprotein 32 family, member B (ANP32B), mRNA
800746	GATGAGTTTGATGAAGAAGAA	21	1	NM_152401	+	278	297	1	20	19	5G14	2	phosducin-like 2 (PDCL2), mRNA
800746	GATGAGTTTGATGAAGAAGAA	21	1	NM_017637	+	2091	2110	1	20	19	14A5	2	basonuclin 2 (BNC2), mRNA
806460	TTTGCTTGATGGTGTACTTCA	21	1	NM_017886	+	966	986	1	21	19	12TG7	2	unc-51-like kinase 4 (C. elegans) (ULK4), mRNA
813306	TTTAGAACTCATTCCTATATT	21	1	NM_198449	+	3572	3592	1	21	19	14CT5	2	embigin (EMB), mRNA
819278	TTGCTTATTCCATTCTTTAGA	21	1	NM_001105570	+	1897	1915	1	19	19	19	2	nudix (nucleoside diphosphate linked moiety X)-type motif 19 (NUDT19), nuclear gene encoding mitochondrial protein, mRNA
821283	TAAAATTTCTCCACAATCTAT	21	1	NM_001981	-	3561	3581	1	21	19	4A9A6	2	epidermal growth factor receptor pathway substrate 15 (EPS15), transcript variant 1, mRNA
821283	TAAAATTTCTCCACAATCTAT	21	1	NM_001159969	-	2692	2712	1	21	19	4A9A6	2	epidermal growth factor receptor pathway substrate 15 (EPS15), transcript variant 2, mRNA
824593	AATGTTCTAGCTTTTGACCTT	21	1	NM_001205293	+	10636	10655	1	20	19	10C9	2	calcium channel, voltage-dependent, R type, alpha 1E subunit (CACNA1E), transcript variant 1, mRNA
824593	AATGTTCTAGCTTTTGACCTT	21	1	NM_001205294	+	10450	10469	1	20	19	10C9	2	calcium channel, voltage-dependent, R type, alpha 1E subunit (CACNA1E), transcript variant 2, mRNA
824593	AATGTTCTAGCTTTTGACCTT	21	1	NM_000721	+	10507	10526	1	20	19	10C9	2	calcium channel, voltage-dependent, R type, alpha 1E subunit (CACNA1E), transcript variant 3, mRNA
825390	TTTCAGTAGGATTTCTTTCTTT	22	1	NM_053034	-	1474	1495	1	22	20	4A2A14	2	anthrax toxin receptor 1 (ANTXR1), transcript variant 2, mRNA
826275	CCTGATATATAGCCAAGACAA	21	1	NM_001792	+	765	785	1	21	19	10AG9	2	cadherin 2, type 1, N-cadherin (neuronal) (CDH2), mRNA
827591	AAAACATTTTATTTATCTATTG	22	1	NM_152490	+	1934	1955	1	22	20	4CA16	2	beta-1,3-N-acetylgalactosaminyltransferase 2 (B3GALNT2), mRNA
829611	TTCATTTTTTGATTTTTGTTTG	22	1	NM_022459	+	6134	6154	1	21	20	9T11	2	exportin 4 (XPO4), mRNA
829611	TTCATTTTTTGATTTTTGTTTG	22	1	NM_033225	-	12527	12548	1	22	20	5T11G4	2	CUB and Sushi multiple domains 1 (CSMD1), mRNA
829611	TTCATTTTTTGATTTTTGTTTG	22	1	NM_006547	+	3493	3514	1	22	20	2C9T9	2	insulin-like growth factor 2 mRNA binding protein 3 (IGF2BP3), mRNA
829611	TTCATTTTTTGATTTTTGTTTG	22	1	NM_020399	-	745	766	1	22	20	10GA10	2	golgi-associated PDZ and coiled-coil motif containing (GOPC), transcript variant 1, mRNA
829611	TTCATTTTTTGATTTTTGTTTG	22	1	NM_001017408	-	721	742	1	22	20	10GA10	2	golgi-associated PDZ and coiled-coil motif containing (GOPC), transcript variant 2, mRNA
833303	AAGAGAATTTACAGTTCTGTT	21	1	NM_016107	+	4372	4391	2	21	19	3G16	2	zinc finger RNA binding protein (ZFR), mRNA
838530	TAAAACATATTTATAGGTAAG	21	1	NM_133379	-	10753	10773	1	21	19	13T1G5	2	titin (TTN), transcript variant novex-3, mRNA
838598	AAGAAGATGAGCATTATTTCA	21	1	NM_001077244	+	441	460	1	20	19	11C8	2	glutamate receptor, ionotrophic, AMPA 4 (GRIA4), transcript variant 3, mRNA
838598	AAGAAGATGAGCATTATTTCA	21	1	NM_000829	+	441	460	1	20	19	11C8	2	glutamate receptor, ionotrophic, AMPA 4 (GRIA4), transcript variant 1, mRNA
838598	AAGAAGATGAGCATTATTTCA	21	1	NM_001077243	+	441	460	1	20	19	11C8	2	glutamate receptor, ionotrophic, AMPA 4 (GRIA4), transcript variant 2, mRNA
838598	AAGAAGATGAGCATTATTTCA	21	1	NM_001112812	+	309	328	1	20	19	11C8	2	glutamate receptor, ionotrophic, AMPA 4 (GRIA4), transcript variant 4, mRNA
839397	GGGGGTTTCTTTTGGTAGTGT	21	1	NM_053016	+	1772	1792	1	21	19	9T3G7	2	paralemmin 2 (PALM2), transcript variant 1, mRNA
839397	GGGGGTTTCTTTTGGTAGTGT	21	1	NM_001037293	+	1558	1578	1	21	19	9T3G7	2	paralemmin 2 (PALM2), transcript variant 2, mRNA
839918	CAAACCCATTTTCTTTCAGTA	21	1	NM_001031713	-	652	672	1	21	19	10T4T5	2	coiled-coil domain containing 90A (CCDC90A), mRNA
839918	CAAACCCATTTTCTTTCAGTA	21	1	NM_004650	-	899	919	1	21	19	6C9C4	2	patatin-like phospholipase domain containing 4 (PNPLA4), transcript variant 1, mRNA
839918	CAAACCCATTTTCTTTCAGTA	21	1	NM_001172672	-	611	631	1	21	19	6C9C4	2	patatin-like phospholipase domain containing 4 (PNPLA4), transcript variant 3, mRNA
839918	CAAACCCATTTTCTTTCAGTA	21	1	NM_001142389	-	804	824	1	21	19	6C9C4	2	patatin-like phospholipase domain containing 4 (PNPLA4), transcript variant 2, mRNA
844047	GAACTCGTGCATTTTCTGCTG	21	1	NM_013265	+	2279	2299	1	21	19	11T2T6	2	chromosome 11 open reading frame 2 (C11orf2), mRNA
844047	GAACTCGTGCATTTTCTGCTG	21	1	NM_145011	-	97	117	1	21	19	5C2G12	2	zinc finger protein 25 (ZNF25), mRNA
846760	AAAAAAGAAAAAGAAATACCTG	22	1	NM_012228	+	926	946	2	22	20	11G9	2	methionine sulfoxide reductase B2 (MSRB2), mRNA
848905	CTTCTTCATCAAACTCATCTTC	22	1	NM_002525	-	845	865	2	22	20	3T17	2	nardilysin (N-arginine dibasic convertase) (NRD1), transcript variant 1, mRNA
848905	CTTCTTCATCAAACTCATCTTC	22	1	NM_001101662	-	845	865	2	22	20	3T17	2	nardilysin (N-arginine dibasic convertase) (NRD1), transcript variant 2, mRNA
848905	CTTCTTCATCAAACTCATCTTC	22	1	NM_001242361	-	240	260	2	22	20	3T17	2	nardilysin (N-arginine dibasic convertase) (NRD1), transcript variant 3, mRNA
848905	CTTCTTCATCAAACTCATCTTC	22	1	NM_032305	-	645	666	1	22	20	11A4A5	2	polymerase (RNA) III (DNA directed) polypeptide G (32kD)-like (POLR3GL), mRNA
848905	CTTCTTCATCAAACTCATCTTC	22	1	NM_198559	-	428	449	1	22	20	2T5T13	2	chromosome 2 open reading frame 62 (C2orf62), mRNA
857767	TGATGAAGATGAGTTTGATGA	21	1	NM_007040	+	893	912	2	21	19	11G8	2	heterogeneous nuclear ribonucleoprotein U-like 1 (HNRNPUL1), transcript variant 1, mRNA
857767	TGATGAAGATGAGTTTGATGA	21	1	NM_144732	+	406	425	2	21	19	11G8	2	heterogeneous nuclear ribonucleoprotein U-like 1 (HNRNPUL1), transcript variant 4, mRNA
857767	TGATGAAGATGAGTTTGATGA	21	1	NM_006391	+	2851	2871	1	21	19	12GT7	2	importin 7 (IPO7), mRNA
857767	TGATGAAGATGAGTTTGATGA	21	1	NM_016312	+	1229	1249	1	21	19	12G1T6	2	WW domain binding protein 11 (WBP11), mRNA
857767	TGATGAAGATGAGTTTGATGA	21	1	NM_002520	+	773	793	1	21	19	6A5G8	2	nucleophosmin (nucleolar phosphoprotein B23, numatrin) (NPM1), transcript variant 1, mRNA
860389	AATCATGGCACATTTCTCAGA	21	1	NM_003384	+	1593	1613	1	21	19	6G1C12	2	vaccinia related kinase 1 (VRK1), mRNA
860765	AGTTGAAGAAGAGGAAGAAGGG	22	1	NM_015934	+	1551	1570	1	20	20	20	2	NOP58 ribonucleoprotein homolog (yeast) (NOP58), mRNA
860765	AGTTGAAGAAGAGGAAGAAGGG	22	1	NR_036466	-	154	174	1	21	20	2T18	2	uncharacterized LOC100499405 (LOC100499405), non-coding RNA
861075	ATTTTTATTTTTATGGTTTCT	21	1	NM_006827	-	4136	4155	2	21	19	5A14	2	transmembrane emp24-like trafficking protein 10 (yeast) (TMED10), mRNA
861075	ATTTTTATTTTTATGGTTTCT	21	1	NM_207303	-	6596	6616	1	21	19	9T5G5	2	attractin-like 1 (ATRNL1), mRNA
861075	ATTTTTATTTTTATGGTTTCT	21	1	NR_045385	-	959	979	1	21	19	14GG5	2	uncharacterized LOC100507117 (LOC100507117), non-coding RNA
861075	ATTTTTATTTTTATGGTTTCT	21	1	NM_007195	+	5155	5175	1	21	19	14GG5	2	polymerase (DNA directed) iota (POLI), mRNA
865875	ATAGGGATGGTTGATTCTTCT	21	1	NM_003053	+	1474	1494	1	21	19	5G5T9	2	solute carrier family 18 (vesicular monoamine), member 1 (SLC18A1), transcript variant 2, mRNA
865875	ATAGGGATGGTTGATTCTTCT	21	1	NM_001135691	+	1678	1698	1	21	19	5G5T9	2	solute carrier family 18 (vesicular monoamine), member 1 (SLC18A1), transcript variant 1, mRNA
865875	ATAGGGATGGTTGATTCTTCT	21	1	NM_001142324	+	1582	1602	1	21	19	5G5T9	2	solute carrier family 18 (vesicular monoamine), member 1 (SLC18A1), transcript variant 3, mRNA
865875	ATAGGGATGGTTGATTCTTCT	21	1	NM_001142325	+	1678	1698	1	21	19	5G5T9	2	solute carrier family 18 (vesicular monoamine), member 1 (SLC18A1), transcript variant 4, mRNA
867096	TTACTCAAAATAATCTCTCTTG	22	1	NM_012424	-	864	885	1	22	20	2A3A15	2	ribosomal protein S6 kinase, 52kDa, polypeptide 1 (RPS6KC1), transcript variant 1, mRNA
867096	TTACTCAAAATAATCTCTCTTG	22	1	NM_001136138	-	828	849	1	22	20	2A3A15	2	ribosomal protein S6 kinase, 52kDa, polypeptide 1 (RPS6KC1), transcript variant 2, mRNA
867976	TTTGAAATGAGAATCAGTGGAA	22	1	NM_014500	+	737	758	1	22	20	7T7A6	2	HIV-1 Tat specific factor 1 (HTATSF1), transcript variant 2, mRNA
867976	TTTGAAATGAGAATCAGTGGAA	22	1	NM_001163280	+	986	1007	1	22	20	7T7A6	2	HIV-1 Tat specific factor 1 (HTATSF1), transcript variant 1, mRNA
868547	TCAGCCAAGTCTGCTCTGTCC	21	1	NM_002027	-	249	269	1	21	19	6A1G12	2	farnesyltransferase, CAAX box, alpha (FNTA), transcript variant 1, mRNA
875654	CATTTTTAGATTCTCTCCAGA	21	1	NR_030672	-	268	288	1	21	19	5T5T9	2	KIAA1324-like (KIAA1324L), transcript variant 3, non-coding RNA
875654	CATTTTTAGATTCTCTCCAGA	21	1	NM_001142749	-	510	530	1	21	19	5T5T9	2	KIAA1324-like (KIAA1324L), transcript variant 1, mRNA
876429	AGACATATTTTCAACTGACAG	21	1	NM_005245	+	2783	2803	1	21	19	5T8C6	2	FAT tumor suppressor homolog 1 (Drosophila) (FAT1), mRNA
877270	AGACATTATAGCTCCTCCTTC	21	1	NR_002776	-	1609	1629	1	21	19	6TA13	2	MCM3AP antisense RNA 1 (non-protein coding) (MCM3AP-AS1), antisense RNA
877337	GTTTTGTTTTGAGATATGTTT	21	1	NM_032299	+	1265	1284	2	21	19	12A7	2	DCN1, defective in cullin neddylation 1, domain containing 5 (S. cerevisiae) (DCUN1D5), mRNA
887034	CATACCAGAGAAAGAGAGGTT	21	1	NM_025142	-	8961	8981	1	21	19	4C9A6	2	TAO kinase 1 (TAOK1), transcript variant 2, mRNA
887034	CATACCAGAGAAAGAGAGGTT	21	1	NM_020791	-	9405	9425	1	21	19	4C9A6	2	TAO kinase 1 (TAOK1), transcript variant 1, mRNA
894380	TGCCCTGAAAAAGATCAATGTT	22	1	NM_002285	-	4044	4065	1	22	20	7A9A4	2	AF4/FMR2 family, member 3 (AFF3), transcript variant 1, mRNA
894380	TGCCCTGAAAAAGATCAATGTT	22	1	NM_001025108	-	4027	4048	1	22	20	7A9A4	2	AF4/FMR2 family, member 3 (AFF3), transcript variant 2, mRNA
894584	TTTAATGTGATGATTTGTAAGA	22	1	NM_001080546	+	1441	1462	1	22	20	11G5T4	2	transmembrane protein 218 (TMEM218), mRNA
895894	TCTTTCTTGCTGCTTCCTCCT	21	1	NM_012224	-	1734	1752	1	19	19	19	2	NIMA (never in mitosis gene a)-related kinase 1 (NEK1), transcript variant 2, mRNA
895894	TCTTTCTTGCTGCTTCCTCCT	21	1	NM_001199397	-	1656	1674	1	19	19	19	2	NIMA (never in mitosis gene a)-related kinase 1 (NEK1), transcript variant 1, mRNA
895894	TCTTTCTTGCTGCTTCCTCCT	21	1	NM_001199398	-	1656	1674	1	19	19	19	2	NIMA (never in mitosis gene a)-related kinase 1 (NEK1), transcript variant 3, mRNA
895894	TCTTTCTTGCTGCTTCCTCCT	21	1	NM_001199399	-	1656	1674	1	19	19	19	2	NIMA (never in mitosis gene a)-related kinase 1 (NEK1), transcript variant 4, mRNA
895894	TCTTTCTTGCTGCTTCCTCCT	21	1	NM_001199400	-	1734	1752	1	19	19	19	2	NIMA (never in mitosis gene a)-related kinase 1 (NEK1), transcript variant 5, mRNA
897061	TCCCGAGGTCTTTGTATTTTGC	22	1	NM_014023	+	3014	3035	1	22	20	4G10A6	2	WD repeat domain 37 (WDR37), mRNA
900598	CAGAAAAAACATTGTATGGAA	21	1	NM_014701	+	1222	1242	1	21	19	10A3T6	2	SECIS binding protein 2-like (SECISBP2L), transcript variant 2, mRNA
900598	CAGAAAAAACATTGTATGGAA	21	1	NM_001193489	+	1222	1242	1	21	19	10A3T6	2	SECIS binding protein 2-like (SECISBP2L), transcript variant 1, mRNA
904340	TAGCGAGGAGGATGCAAAGGA	21	1	NM_003013	-	691	710	1	20	19	8A11	2	secreted frizzled-related protein 2 (SFRP2), mRNA
905688	AATTTTGGCCAAATTTGGGTTT	22	1	NM_182644	-	2330	2351	1	22	20	6G12T2	2	EPH receptor A3 (EPHA3), transcript variant 2, mRNA
906507	TTGCAATGAAATTGAATGGGC	21	1	NM_001817	+	1083	1103	1	21	19	6T4T9	2	carcinoembryonic antigen-related cell adhesion molecule 4 (CEACAM4), mRNA
913540	TCAAGAACAAGAAATAAGGAG	21	1	NM_003168	-	466	486	1	21	19	2A15G2	2	suppressor of Ty 4 homolog 1 (S. cerevisiae) (SUPT4H1), mRNA
913540	TCAAGAACAAGAAATAAGGAG	21	1	NM_173469	-	1763	1783	1	21	19	7C4A8	2	ubiquitin-conjugating enzyme E2Q family member 2 (UBE2Q2), transcript variant 1, mRNA
914665	TGAAGGTCATGTCAGTGGCTC	21	1	NM_002471	-	1701	1719	1	19	19	19	2	myosin, heavy chain 6, cardiac muscle, alpha (MYH6), mRNA
914900	ATGATATTTTTGGAGAGCTGA	21	1	NM_003893	-	1208	1227	2	21	19	4A15	2	LIM domain binding 1 (LDB1), transcript variant 3, mRNA
914900	ATGATATTTTTGGAGAGCTGA	21	1	NM_001113407	-	1015	1034	2	21	19	4A15	2	LIM domain binding 1 (LDB1), transcript variant 1, mRNA
916877	TTAAGGACTCTTTGTTTGTTC	21	1	NM_001490	-	4721	4740	1	20	19	9C10	2	glucosaminyl (N-acetyl) transferase 1, core 2 (GCNT1), transcript variant 2, mRNA
916877	TTAAGGACTCTTTGTTTGTTC	21	1	NM_001097633	-	4603	4622	1	20	19	9C10	2	glucosaminyl (N-acetyl) transferase 1, core 2 (GCNT1), transcript variant 3, mRNA
916877	TTAAGGACTCTTTGTTTGTTC	21	1	NM_001097634	-	5099	5118	1	20	19	9C10	2	glucosaminyl (N-acetyl) transferase 1, core 2 (GCNT1), transcript variant 1, mRNA
916877	TTAAGGACTCTTTGTTTGTTC	21	1	NM_001097635	-	4639	4658	1	20	19	9C10	2	glucosaminyl (N-acetyl) transferase 1, core 2 (GCNT1), transcript variant 4, mRNA
916877	TTAAGGACTCTTTGTTTGTTC	21	1	NM_001097636	-	4732	4751	1	20	19	9C10	2	glucosaminyl (N-acetyl) transferase 1, core 2 (GCNT1), transcript variant 5, mRNA
917145	ATTCATTTCAAATGCTTTGCTT	22	1	NM_178335	+	2186	2207	1	22	20	14C4C2	2	coiled-coil domain containing 50 (CCDC50), transcript variant 2, mRNA
917145	ATTCATTTCAAATGCTTTGCTT	22	1	NM_174908	+	1658	1679	1	22	20	14C4C2	2	coiled-coil domain containing 50 (CCDC50), transcript variant 1, mRNA
917946	GGTTTCAGACTGAGAAATGGA	21	1	NM_003805	+	89	109	1	21	19	4T5T10	2	CASP2 and RIPK1 domain containing adaptor with death domain (CRADD), mRNA
921432	TCTTGCTGCTTCCTCCTGCAT	21	1	NM_014727	-	691	709	2	20	19	19	2	myeloid/lymphoid or mixed-lineage leukemia 4 (MLL4), mRNA
924816	TTCTCAGAAGCATTGTAACAT	21	1	NM_004713	-	1282	1302	1	21	19	4C2A13	2	nuclear export mediator factor (NEMF), mRNA
925770	GGATGATGATGATTCTGAGAT	21	1	NM_004183	+	1480	1499	1	20	19	14C5	2	bestrophin 1 (BEST1), transcript variant 1, mRNA
925770	GGATGATGATGATTCTGAGAT	21	1	NM_001139443	+	1292	1311	1	20	19	14C5	2	bestrophin 1 (BEST1), transcript variant 2, mRNA
927704	CCCTTTCTTCACTTGATCTTC	21	1	NM_033222	-	1700	1719	1	20	19	10A9	2	PC4 and SFRS1 interacting protein 1 (PSIP1), transcript variant 2, mRNA
927704	CCCTTTCTTCACTTGATCTTC	21	1	NM_001128217	-	1697	1716	1	20	19	10A9	2	PC4 and SFRS1 interacting protein 1 (PSIP1), transcript variant 3, mRNA
932072	TTCTACGAATGAAAAAGGATG	21	1	NM_030809	-	2759	2779	1	21	19	4A4T11	2	cysteine-serine-rich nuclear protein 2 (CSRNP2), transcript variant 1, mRNA
932072	TTCTACGAATGAAAAAGGATG	21	1	NR_045072	-	2852	2872	1	21	19	4A4T11	2	cysteine-serine-rich nuclear protein 2 (CSRNP2), transcript variant 2, non-coding RNA
933563	GAGGTTGTTGAAACAGATGAA	21	1	NM_018227	+	2451	2470	2	21	19	8G11	2	ubiquitin-like modifier activating enzyme 6 (UBA6), mRNA
934456	TTTCTCAGAAGCATTGTAACAT	22	1	NM_004713	-	1282	1303	1	22	20	5C2A13	2	nuclear export mediator factor (NEMF), mRNA
937510	TTCTTCATCAAACTCATCTTC	21	1	NM_032305	-	645	665	1	21	19	10A4A5	2	polymerase (RNA) III (DNA directed) polypeptide G (32kD)-like (POLR3GL), mRNA
937510	TTCTTCATCAAACTCATCTTC	21	1	NM_014389	-	3008	3028	1	21	19	6A8A5	2	proline, glutamate and leucine rich protein 1 (PELP1), mRNA
939410	TTTTTGTTGTTTTTGTTATTTT	22	1	NM_015084	+	1648	1668	1	21	20	17A3	2	mitochondrial ribosomal protein S27 (MRPS27), nuclear gene encoding mitochondrial protein, mRNA
939410	TTTTTGTTGTTTTTGTTATTTT	22	1	NM_001080407	-	2742	2762	2	22	20	10T10	2	galactosidase, beta 1-like 3 (GLB1L3), mRNA
939410	TTTTTGTTGTTTTTGTTATTTT	22	1	NM_005610	+	5347	5367	1	21	20	17A3	2	retinoblastoma binding protein 4 (RBBP4), transcript variant 1, mRNA
939410	TTTTTGTTGTTTTTGTTATTTT	22	1	NM_001135255	+	5344	5364	1	21	20	17A3	2	retinoblastoma binding protein 4 (RBBP4), transcript variant 2, mRNA
939410	TTTTTGTTGTTTTTGTTATTTT	22	1	NM_001135256	+	5247	5267	1	21	20	17A3	2	retinoblastoma binding protein 4 (RBBP4), transcript variant 3, mRNA
939410	TTTTTGTTGTTTTTGTTATTTT	22	1	NM_178153	+	1308	1328	2	22	20	10T10	2	doublecortin (DCX), transcript variant 3, mRNA
939410	TTTTTGTTGTTTTTGTTATTTT	22	1	NM_000555	+	1606	1626	2	22	20	10T10	2	doublecortin (DCX), transcript variant 1, mRNA
939410	TTTTTGTTGTTTTTGTTATTTT	22	1	NM_001195553	+	1326	1346	2	22	20	10T10	2	doublecortin (DCX), transcript variant 5, mRNA
939410	TTTTTGTTGTTTTTGTTATTTT	22	1	NM_178151	+	1435	1455	2	22	20	10T10	2	doublecortin (DCX), transcript variant 4, mRNA
939410	TTTTTGTTGTTTTTGTTATTTT	22	1	NM_178152	+	1323	1343	2	22	20	10T10	2	doublecortin (DCX), transcript variant 2, mRNA
941829	AAGCATCAGTGTCTGAAGATT	21	1	NM_016936	+	1354	1373	1	20	19	9T10	2	ubinuclein 1 (UBN1), transcript variant 1, mRNA
941829	AAGCATCAGTGTCTGAAGATT	21	1	NM_001079514	+	851	870	1	20	19	9T10	2	ubinuclein 1 (UBN1), transcript variant 2, mRNA
941910	TTGTTAGAATAGAACAGAAAT	21	1	NM_018974	-	1698	1718	1	21	19	14C1G4	2	unc-93 homolog A (C. elegans) (UNC93A), transcript variant 1, mRNA
941910	TTGTTAGAATAGAACAGAAAT	21	1	NM_001143947	-	1572	1592	1	21	19	14C1G4	2	unc-93 homolog A (C. elegans) (UNC93A), transcript variant 2, mRNA
943183	CACAGTTCTGATAGTTTTGTC	21	1	NM_019894	-	2855	2874	1	20	19	12A7	2	transmembrane protease, serine 4 (TMPRSS4), transcript variant 1, mRNA
943183	CACAGTTCTGATAGTTTTGTC	21	1	NM_001083947	-	2840	2859	1	20	19	12A7	2	transmembrane protease, serine 4 (TMPRSS4), transcript variant 3, mRNA
943183	CACAGTTCTGATAGTTTTGTC	21	1	NM_001173551	-	2849	2868	1	20	19	12A7	2	transmembrane protease, serine 4 (TMPRSS4), transcript variant 4, mRNA
943183	CACAGTTCTGATAGTTTTGTC	21	1	NM_001173552	-	2735	2754	1	20	19	12A7	2	transmembrane protease, serine 4 (TMPRSS4), transcript variant 5, mRNA
945015	GCTTCCAGAATGTGCTGCCTG	21	1	NM_130466	+	4584	4602	3	21	19	19	2	ubiquitin protein ligase E3B (UBE3B), transcript variant 1, mRNA
945015	GCTTCCAGAATGTGCTGCCTG	21	1	NM_183415	+	4239	4257	3	21	19	19	2	ubiquitin protein ligase E3B (UBE3B), transcript variant 3, mRNA
945328	CTGTCAGTTGAAAATATGTCT	21	1	NM_005245	-	2783	2803	1	21	19	6G8A5	2	FAT tumor suppressor homolog 1 (Drosophila) (FAT1), mRNA
951511	AACCATCCCTATTTTTGCTGA	21	1	NM_001777	-	2015	2035	1	21	19	6CC13	2	CD47 molecule (CD47), transcript variant 1, mRNA
951511	AACCATCCCTATTTTTGCTGA	21	1	NM_198793	-	1957	1977	1	21	19	6CC13	2	CD47 molecule (CD47), transcript variant 2, mRNA
952076	TCCAAAGGAAGATGTTCCCTC	21	1	NR_046115	-	869	889	1	21	19	4A9T6	2	Rh family, B glycoprotein (gene/pseudogene) (RHBG), transcript variant 4, non-coding RNA
956071	TCAATAAATTTAAGGGAGTCC	21	1	NM_031417	+	3300	3319	2	21	19	13G6	2	MAP/microtubule affinity-regulating kinase 4 (MARK4), transcript variant 2, mRNA
956071	TCAATAAATTTAAGGGAGTCC	21	1	NM_001199867	+	3220	3239	2	21	19	13G6	2	MAP/microtubule affinity-regulating kinase 4 (MARK4), transcript variant 1, mRNA
962836	TCTGAGAAATGTGCCATGATT	21	1	NM_003384	-	1593	1613	1	21	19	12G1C6	2	vaccinia related kinase 1 (VRK1), mRNA
966727	GACTCACTTTTACCACTAGTT	21	1	NM_001171109	+	2542	2561	1	20	19	2C17	2	family with sequence similarity 133, member A (FAM133A), transcript variant 3, mRNA
966727	GACTCACTTTTACCACTAGTT	21	1	NM_173698	+	2522	2541	1	20	19	2C17	2	family with sequence similarity 133, member A (FAM133A), transcript variant 2, mRNA
966727	GACTCACTTTTACCACTAGTT	21	1	NM_001171110	+	2577	2596	1	20	19	2C17	2	family with sequence similarity 133, member A (FAM133A), transcript variant 1, mRNA
966727	GACTCACTTTTACCACTAGTT	21	1	NM_001171111	+	2453	2472	1	20	19	2C17	2	family with sequence similarity 133, member A (FAM133A), transcript variant 4, mRNA
967851	TCTTGATGAAAATGGGTTTAAT	22	1	NM_030640	+	605	625	1	21	20	5A15	2	dual specificity phosphatase 16 (DUSP16), mRNA
968529	CTCTGCTTCACTCGCTCCTCT	21	1	NM_001456	-	1821	1840	2	21	19	10T9	2	filamin A, alpha (FLNA), transcript variant 1, mRNA
968529	CTCTGCTTCACTCGCTCCTCT	21	1	NM_001110556	-	1821	1840	2	21	19	10T9	2	filamin A, alpha (FLNA), transcript variant 2, mRNA
971579	TGCTGGTACATCTGGGACACA	21	1	NM_058216	+	267	287	1	21	19	14G1A4	2	RAD51 homolog C (S. cerevisiae) (RAD51C), transcript variant 1, mRNA
971579	TGCTGGTACATCTGGGACACA	21	1	NM_002876	+	267	287	1	21	19	14G1A4	2	RAD51 homolog C (S. cerevisiae) (RAD51C), transcript variant 2, mRNA
973312	GAGATCTAGCTCTAATAGCCC	21	1	NM_012395	-	3586	3606	1	21	19	5C2G12	2	cyclin-dependent kinase 14 (CDK14), mRNA
983390	GGACAGGATTGGAGCCACTGAC	22	1	NR_036634	-	709	730	1	22	20	9T4C7	2	transforming growth factor, beta receptor III (TGFBR3), transcript variant 4, non-coding RNA
983390	GGACAGGATTGGAGCCACTGAC	22	1	NM_001195684	-	448	469	1	22	20	9T4C7	2	transforming growth factor, beta receptor III (TGFBR3), transcript variant 3, mRNA
983390	GGACAGGATTGGAGCCACTGAC	22	1	NM_003243	-	612	633	1	22	20	9T4C7	2	transforming growth factor, beta receptor III (TGFBR3), transcript variant 1, mRNA
983390	GGACAGGATTGGAGCCACTGAC	22	1	NM_001195683	-	612	633	1	22	20	9T4C7	2	transforming growth factor, beta receptor III (TGFBR3), transcript variant 2, mRNA
987196	TTTTTCTTTTTTTCTCTAATTC	22	1	NM_001031812	+	2156	2176	1	21	20	5C15	2	casein kinase 1, gamma 3 (CSNK1G3), transcript variant 2, mRNA
987196	TTTTTCTTTTTTTCTCTAATTC	22	1	NM_001044722	+	2132	2152	1	21	20	5C15	2	casein kinase 1, gamma 3 (CSNK1G3), transcript variant 3, mRNA
987196	TTTTTCTTTTTTTCTCTAATTC	22	1	NM_004384	+	2228	2248	1	21	20	5C15	2	casein kinase 1, gamma 3 (CSNK1G3), transcript variant 1, mRNA
987196	TTTTTCTTTTTTTCTCTAATTC	22	1	NM_001044723	+	2252	2272	1	21	20	5C15	2	casein kinase 1, gamma 3 (CSNK1G3), transcript variant 4, mRNA
987196	TTTTTCTTTTTTTCTCTAATTC	22	1	NR_038319	+	2048	2069	1	22	20	15CT5	2	uncharacterized LOC100505716 (LOC100505716), non-coding RNA
991372	TAAAATTAACACACTAAGCAAG	22	1	NM_019600	+	3868	3889	1	22	20	5T10A5	2	family with sequence similarity 214, member A (FAM214A), mRNA
993286	TGCTTGGTTACTAATTGGCTC	21	1	NM_006380	+	5010	5030	1	21	19	10CT9	2	amyloid beta precursor protein (cytoplasmic tail) binding protein 2 (APPBP2), mRNA
994041	TTATTATTAAGCACAACACACA	22	1	NR_046114	-	2498	2519	1	22	20	3T1A16	2	uncharacterized LOC441369 (FLJ46284), non-coding RNA
997294	ATGGATAGGGCTGTGGATGAG	21	1	NM_025233	+	1915	1935	1	21	19	6A9A4	2	CoA synthase (COASY), nuclear gene encoding mitochondrial protein, transcript variant 1, mRNA
997294	ATGGATAGGGCTGTGGATGAG	21	1	NM_001042529	+	1523	1543	1	21	19	6A9A4	2	CoA synthase (COASY), nuclear gene encoding mitochondrial protein, transcript variant 2, mRNA
997294	ATGGATAGGGCTGTGGATGAG	21	1	NM_001042530	+	1779	1799	1	21	19	6A9A4	2	CoA synthase (COASY), nuclear gene encoding mitochondrial protein, transcript variant 3, mRNA
997294	ATGGATAGGGCTGTGGATGAG	21	1	NM_001042531	+	1202	1222	1	21	19	6A9A4	2	CoA synthase (COASY), nuclear gene encoding mitochondrial protein, transcript variant 5, mRNA
997294	ATGGATAGGGCTGTGGATGAG	21	1	NM_001042532	+	1655	1675	1	21	19	6A9A4	2	CoA synthase (COASY), nuclear gene encoding mitochondrial protein, transcript variant 4, mRNA
1001753	GAAGATGAGTTTGATGAAGAAG	22	1	NM_002525	+	845	865	1	21	20	17A3	2	nardilysin (N-arginine dibasic convertase) (NRD1), transcript variant 1, mRNA
1001753	GAAGATGAGTTTGATGAAGAAG	22	1	NM_001101662	+	845	865	1	21	20	17A3	2	nardilysin (N-arginine dibasic convertase) (NRD1), transcript variant 2, mRNA
1001753	GAAGATGAGTTTGATGAAGAAG	22	1	NM_001242361	+	240	260	1	21	20	17A3	2	nardilysin (N-arginine dibasic convertase) (NRD1), transcript variant 3, mRNA
1001753	GAAGATGAGTTTGATGAAGAAG	22	1	NM_032305	+	645	666	1	22	20	5T4T11	2	polymerase (RNA) III (DNA directed) polypeptide G (32kD)-like (POLR3GL), mRNA
1001753	GAAGATGAGTTTGATGAAGAAG	22	1	NM_198559	+	428	449	1	22	20	13A5A2	2	chromosome 2 open reading frame 62 (C2orf62), mRNA
1002466	GATTAAAAGGAAAAAGAAAGGG	22	1	NM_003142	+	1178	1199	1	22	20	4A9A7	2	Sjogren syndrome antigen B (autoantigen La) (SSB), mRNA
1004670	TTTTTAGCTTTGGACATGACAA	22	1	NM_032040	+	3059	3080	1	22	20	2T12A6	2	coiled-coil domain containing 8 (CCDC8), mRNA
1005451	TAATATAGACAACGGCTCTAT	21	1	NM_001167672	-	16053	16073	1	21	19	5T4A10	2	LIM domain containing preferred translocation partner in lipoma (LPP), transcript variant 3, mRNA
1005451	TAATATAGACAACGGCTCTAT	21	1	NM_005578	-	16584	16604	1	21	19	5T4A10	2	LIM domain containing preferred translocation partner in lipoma (LPP), transcript variant 1, mRNA
1005451	TAATATAGACAACGGCTCTAT	21	1	NM_001167671	-	16527	16547	1	21	19	5T4A10	2	LIM domain containing preferred translocation partner in lipoma (LPP), transcript variant 2, mRNA
1006420	ATTTCTCAGTCTGAAACCACC	21	1	NR_015425	+	897	917	1	21	19	7AG12	2	uncharacterized LOC338588 (LOC338588), non-coding RNA
1006512	AGCATTGACCTCCTAAAATACC	22	1	NM_000963	+	3074	3095	1	22	20	4T7C9	2	prostaglandin-endoperoxide synthase 2 (prostaglandin G/H synthase and cyclooxygenase) (PTGS2), mRNA
1008120	TTTTGTTGTTTTTGTTATTTT	21	1	NM_015084	+	1649	1668	1	20	19	16A3	2	mitochondrial ribosomal protein S27 (MRPS27), nuclear gene encoding mitochondrial protein, mRNA
1008120	TTTTGTTGTTTTTGTTATTTT	21	1	NM_007214	-	5977	5996	2	21	19	15A4	2	SEC63 homolog (S. cerevisiae) (SEC63), mRNA
1008120	TTTTGTTGTTTTTGTTATTTT	21	1	NM_005610	+	5348	5367	1	20	19	16A3	2	retinoblastoma binding protein 4 (RBBP4), transcript variant 1, mRNA
1008120	TTTTGTTGTTTTTGTTATTTT	21	1	NM_001135255	+	5345	5364	1	20	19	16A3	2	retinoblastoma binding protein 4 (RBBP4), transcript variant 2, mRNA
1009731	TTTTTCATTTTGTCTTCTAGA	21	1	NM_005907	-	2043	2062	1	20	19	16C3	2	mannosidase, alpha, class 1A, member 1 (MAN1A1), mRNA
1009731	TTTTTCATTTTGTCTTCTAGA	21	1	NM_002922	-	165	185	1	21	19	4T9T6	2	regulator of G-protein signaling 1 (RGS1), mRNA
1010723	CTCAGCTCTTCCTCATCCACA	21	1	NM_019087	+	466	486	1	21	19	11CT8	2	ADP-ribosylation factor-like 15 (ARL15), mRNA
1016197	TGTCATGTATTCTTGGACAAA	21	1	NM_006984	+	658	678	1	21	19	8A4T7	2	claudin 10 (CLDN10), transcript variant b, mRNA
1016197	TGTCATGTATTCTTGGACAAA	21	1	NM_001160100	+	769	789	1	21	19	8A4T7	2	claudin 10 (CLDN10), transcript variant a_v1, mRNA
1016197	TGTCATGTATTCTTGGACAAA	21	1	NM_182848	+	826	846	1	21	19	8A4T7	2	claudin 10 (CLDN10), transcript variant a, mRNA
1017854	ATTCCAGCTCCAAGAAAAAGA	21	1	NM_012311	+	1100	1120	1	21	19	8T3A8	2	KIN, antigenic determinant of recA protein homolog (mouse) (KIN), transcript variant 1, mRNA
1017854	ATTCCAGCTCCAAGAAAAAGA	21	1	NR_045609	+	1100	1120	1	21	19	8T3A8	2	KIN, antigenic determinant of recA protein homolog (mouse) (KIN), transcript variant 3, non-coding RNA
1017854	ATTCCAGCTCCAAGAAAAAGA	21	1	NR_045610	+	1005	1025	1	21	19	8T3A8	2
1020278	TTGCAGGTAGATGATAACCCT	21	1	NM_004737	-	3128	3148	1	21	19	6GT13	2	like-glycosyltransferase (LARGE), transcript variant 1, mRNA
1020278	TTGCAGGTAGATGATAACCCT	21	1	NM_133642	-	3065	3085	1	21	19	6GT13	2	like-glycosyltransferase (LARGE), transcript variant 2, mRNA
1025158	CACAGTTCCTATCATGACAGAT	22	1	NM_024611	+	1504	1525	1	22	20	6T4T10	2	NMDA receptor regulated 2 (NARG2), transcript variant 1, mRNA
1025158	CACAGTTCCTATCATGACAGAT	22	1	NM_001018089	+	1344	1365	1	22	20	6T4T10	2	NMDA receptor regulated 2 (NARG2), transcript variant 2, mRNA
1027120	CTTTGGAACATATGAATCTGA	21	1	NM_016194	+	893	913	1	21	19	5G4T10	2	guanine nucleotide binding protein (G protein), beta 5 (GNB5), transcript variant 2, mRNA
1027120	CTTTGGAACATATGAATCTGA	21	1	NM_006578	+	788	808	1	21	19	5G4T10	2	guanine nucleotide binding protein (G protein), beta 5 (GNB5), transcript variant 1, mRNA
1030116	GTGGTAAAGTGTGTGTTGATG	21	1	NM_001172	-	557	577	1	21	19	7A1T11	2	arginase, type II (ARG2), nuclear gene encoding mitochondrial protein, mRNA
1030289	GGTATTTTAGGAGGTCAATGCT	22	1	NM_000963	-	3074	3095	1	22	20	9G7A4	2	prostaglandin-endoperoxide synthase 2 (prostaglandin G/H synthase and cyclooxygenase) (PTGS2), mRNA
1034744	AAGTGTATGTCCCATCTGGAT	21	1	NR_037142	-	265	284	2	21	19	2T17	2	cytoskeleton associated protein 2-like pseudogene (LOC100289473), non-coding RNA
1035265	TTGTATAAAGGCTTGCTTGGCA	22	1	NM_001243744	+	2315	2336	1	22	20	4A11T5	2	Fanconi anemia, complementation group C (FANCC), transcript variant 3, mRNA
1035550	TATATCCCTATTTTTGATGAT	21	1	NM_001177664	-	5152	5171	2	21	19	16T3	2	RAP1 interacting factor homolog (yeast) (RIF1), transcript variant 3, mRNA
1035550	TATATCCCTATTTTTGATGAT	21	1	NM_018151	-	5249	5268	2	21	19	16T3	2	RAP1 interacting factor homolog (yeast) (RIF1), transcript variant 1, mRNA
1035550	TATATCCCTATTTTTGATGAT	21	1	NM_001177663	-	5249	5268	2	21	19	16T3	2	RAP1 interacting factor homolog (yeast) (RIF1), transcript variant 2, mRNA
1035550	TATATCCCTATTTTTGATGAT	21	1	NM_001177665	-	5422	5441	2	21	19	16T3	2	RAP1 interacting factor homolog (yeast) (RIF1), transcript variant 4, mRNA
1037163	CAAAGTCTATCTTCCAGGAAG	21	1	NM_001145065	-	5152	5170	2	20	19	19	2	family with sequence similarity 190, member A (FAM190A), transcript variant 1, mRNA
1037618	TGATGAAGAATTTGAGGGTCTT	22	1	NM_025114	-	5080	5101	1	22	20	11T3G6	2	centrosomal protein 290kDa (CEP290), mRNA
1038271	ATAAATGTAATTACTACCACTT	22	1	NM_005591	-	2902	2923	1	22	20	5T1T14	2	MRE11 meiotic recombination 11 homolog A (S. cerevisiae) (MRE11A), transcript variant 1, mRNA
1038271	ATAAATGTAATTACTACCACTT	22	1	NM_005590	-	2925	2946	1	22	20	5T1T14	2	MRE11 meiotic recombination 11 homolog A (S. cerevisiae) (MRE11A), transcript variant 2, mRNA
1045787	TGAGAGAATAAATAAAGAATA	21	1	NM_007314	-	5108	5128	1	21	19	3G1G15	2	v-abl Abelson murine leukemia viral oncogene homolog 2 (ABL2), transcript variant b, mRNA
1045787	TGAGAGAATAAATAAAGAATA	21	1	NM_005158	-	4821	4841	1	21	19	3G1G15	2	v-abl Abelson murine leukemia viral oncogene homolog 2 (ABL2), transcript variant c, mRNA
1045787	TGAGAGAATAAATAAAGAATA	21	1	NM_001136000	-	4512	4532	1	21	19	3G1G15	2	v-abl Abelson murine leukemia viral oncogene homolog 2 (ABL2), transcript variant d, mRNA
1045787	TGAGAGAATAAATAAAGAATA	21	1	NM_001168236	-	5045	5065	1	21	19	3G1G15	2	v-abl Abelson murine leukemia viral oncogene homolog 2 (ABL2), transcript variant f, mRNA
1045787	TGAGAGAATAAATAAAGAATA	21	1	NM_001168237	-	4799	4819	1	21	19	3G1G15	2	v-abl Abelson murine leukemia viral oncogene homolog 2 (ABL2), transcript variant g, mRNA
1045787	TGAGAGAATAAATAAAGAATA	21	1	NM_001168238	-	4736	4756	1	21	19	3G1G15	2	v-abl Abelson murine leukemia viral oncogene homolog 2 (ABL2), transcript variant h, mRNA
1045787	TGAGAGAATAAATAAAGAATA	21	1	NM_001168239	-	4449	4469	1	21	19	3G1G15	2	v-abl Abelson murine leukemia viral oncogene homolog 2 (ABL2), transcript variant i, mRNA
1047217	ATTTGCTTGATGGTGTACTTC	21	1	NM_017886	+	965	985	1	21	19	13TG6	2	unc-51-like kinase 4 (C. elegans) (ULK4), mRNA
1047849	TTTTCTTTTCCATGTTTTCTTC	22	1	NM_017934	-	4953	4973	1	21	20	3T17	2	pleckstrin homology domain interacting protein (PHIP), mRNA
1047849	TTTTCTTTTCCATGTTTTCTTC	22	1	NM_174937	-	1605	1626	1	22	20	11A3T6	2	transcription elongation regulator 1-like (TCERG1L), mRNA
1047849	TTTTCTTTTCCATGTTTTCTTC	22	1	NM_021815	-	1843	1864	1	22	20	2T4T14	2	solute carrier family 5 (choline transporter), member 7 (SLC5A7), mRNA
1047849	TTTTCTTTTCCATGTTTTCTTC	22	1	NM_001252507	-	7570	7591	1	22	20	4C4C12	2	chromosome 14 open reading frame 132 (C14orf132), mRNA
1050620	CACCAGATTCTGATCTTCCTCA	22	1	NM_001410	-	10253	10273	2	22	20	6T14	2	multiple EGF-like-domains 8 (MEGF8), mRNA
1052342	TAGGGGAGAAGCAGCAAGCAC	21	1	NR_039881	+	22	41	2	21	19	8A11	2	microRNA 4728 (MIR4728), microRNA
1055158	AAACAGGCAAAACTTGCAGAAC	22	1	NM_004519	+	4130	4151	1	22	20	12C2G6	2	potassium voltage-gated channel, KQT-like subfamily, member 3 (KCNQ3), transcript variant 1, mRNA
1055158	AAACAGGCAAAACTTGCAGAAC	22	1	NM_001204824	+	3581	3602	1	22	20	12C2G6	2	potassium voltage-gated channel, KQT-like subfamily, member 3 (KCNQ3), transcript variant 2, mRNA
1055523	TTTGAAGATTTTAAGGTAGAT	21	1	NM_015313	-	3887	3907	1	21	19	5A3T11	2	Rho guanine nucleotide exchange factor (GEF) 12 (ARHGEF12), transcript variant 1, mRNA
1055523	TTTGAAGATTTTAAGGTAGAT	21	1	NM_001198665	-	3830	3850	1	21	19	5A3T11	2	Rho guanine nucleotide exchange factor (GEF) 12 (ARHGEF12), transcript variant 2, mRNA
1055535	TTCTTTATTTATTCTCTCAAA	21	1	NM_002170	+	973	993	1	21	19	15C1C3	2	interferon, alpha 8 (IFNA8), mRNA
1055535	TTCTTTATTTATTCTCTCAAA	21	1	NM_013272	-	4696	4716	1	21	19	6A3A10	2	solute carrier organic anion transporter family, member 3A1 (SLCO3A1), transcript variant 1, mRNA
1055711	ATCCAGATGGGACATACACTT	21	1	NR_037142	+	265	284	1	20	19	17A2	2	cytoskeleton associated protein 2-like pseudogene (LOC100289473), non-coding RNA
1056011	CTCAGGTGCCTGGAGATCAGC	21	1	NM_005957	-	5301	5321	1	21	19	6T7G6	2	methylenetetrahydrofolate reductase (NAD(P)H) (MTHFR), mRNA
1057684	TTGATTTTTGTTTGATTTTTGT	22	1	NM_001012977	-	1315	1336	1	22	20	14A4T2	2	poly(A) binding protein, cytoplasmic 1-like 2A (PABPC1L2A), mRNA
1057684	TTGATTTTTGTTTGATTTTTGT	22	1	NM_001042506	-	1319	1340	1	22	20	14A4T2	2	poly(A) binding protein, cytoplasmic 1-like 2B (PABPC1L2B), mRNA
1058966	TTTTTTTGCTTTTTCTGAGGTC	22	1	NM_005417	-	4090	4111	1	22	20	7GC13	2	v-src sarcoma (Schmidt-Ruppin A-2) viral oncogene homolog (avian) (SRC), transcript variant 1, mRNA
1058966	TTTTTTTGCTTTTTCTGAGGTC	22	1	NM_198291	-	3989	4010	1	22	20	7GC13	2	v-src sarcoma (Schmidt-Ruppin A-2) viral oncogene homolog (avian) (SRC), transcript variant 2, mRNA
1062747	CTACTTTTGCTTCTTGAATCAG	22	1	NM_003356	-	1420	1441	1	22	20	6T2C12	2	uncoupling protein 3 (mitochondrial, proton carrier) (UCP3), nuclear gene encoding mitochondrial protein, transcript variant long, mRNA
1062975	CTTTTTGTCTGGAAAACCTTGA	22	1	NM_018538	-	2797	2818	1	22	20	2T3G15	2	erythroblast membrane-associated protein (Scianna blood group) (ERMAP), transcript variant 2, mRNA
1062975	CTTTTTGTCTGGAAAACCTTGA	22	1	NM_001017922	-	2901	2922	1	22	20	2T3G15	2	erythroblast membrane-associated protein (Scianna blood group) (ERMAP), transcript variant 1, mRNA
1063158	GATGGAAAAAAGTTATGATTT	21	1	NR_024405	+	3264	3284	1	21	19	14A1G4	2	uncharacterized LOC730101 (LOC730101), transcript variant 2, non-coding RNA
1063158	GATGGAAAAAAGTTATGATTT	21	1	NR_024403	+	3494	3514	1	21	19	14A1G4	2	uncharacterized LOC730101 (LOC730101), transcript variant 1, non-coding RNA
1064756	ATCTGTCTTCTGTTTATCACTC	22	1	NM_024607	+	4140	4160	1	21	20	16T4	2	protein phosphatase 1, regulatory subunit 3B (PPP1R3B), transcript variant 2, mRNA
1064756	ATCTGTCTTCTGTTTATCACTC	22	1	NM_001201329	+	4288	4308	1	21	20	16T4	2	protein phosphatase 1, regulatory subunit 3B (PPP1R3B), transcript variant 1, mRNA
1065180	AAGAGGGGAAGAAGATGCCTTT	22	1	NM_001164824	-	315	336	1	22	20	4G5G11	2	chromosome 1 open reading frame 212 (C1orf212), transcript variant 1, mRNA
1067847	TTGTTTAAAGCATTCTCATTT	21	1	NM_153207	+	5192	5212	1	21	19	14C1C4	2	AE binding protein 2 (AEBP2), transcript variant 1, mRNA
1067847	TTGTTTAAAGCATTCTCATTT	21	1	NM_001114176	+	4631	4651	1	21	19	14C1C4	2	AE binding protein 2 (AEBP2), transcript variant 2, mRNA
1068870	TTGGGCAAATAGTTGGAACCA	21	1	NM_015401	+	3269	3288	2	21	19	7A12	2	histone deacetylase 7 (HDAC7), transcript variant 1, mRNA
1068870	TTGGGCAAATAGTTGGAACCA	21	1	NM_001098416	+	3158	3177	2	21	19	7A12	2	histone deacetylase 7 (HDAC7), transcript variant 4, mRNA
1070100	AGAAAACTCTAGAAGGAGATG	21	1	NM_138420	+	810	829	2	21	19	9A10	2	AHNAK nucleoprotein 2 (AHNAK2), mRNA
1070100	AGAAAACTCTAGAAGGAGATG	21	1	NM_016732	+	4411	4430	2	21	19	8T11	2	RNA binding protein, autoantigenic (hnRNP-associated with lethal yellow homolog (mouse)) (RALY), transcript variant 1, mRNA
1070100	AGAAAACTCTAGAAGGAGATG	21	1	NM_007367	+	4363	4382	2	21	19	8T11	2	RNA binding protein, autoantigenic (hnRNP-associated with lethal yellow homolog (mouse)) (RALY), transcript variant 2, mRNA
1073551	TGTGTCTTCTTCTTCATCAAA	21	1	NM_015571	-	2519	2538	2	21	19	2G17	2	SUMO1/sentrin specific peptidase 6 (SENP6), transcript variant 1, mRNA
1073551	TGTGTCTTCTTCTTCATCAAA	21	1	NM_001100409	-	2498	2517	2	21	19	2G17	2	SUMO1/sentrin specific peptidase 6 (SENP6), transcript variant 2, mRNA
1073708	GTTGAGAGAACAAAGAAATCT	21	1	NM_001142386	+	11039	11058	2	21	19	9C10	2	pyruvate dehydrogenase kinase, isozyme 3 (PDK3), nuclear gene encoding mitochondrial protein, transcript variant 1, mRNA
1077298	AAAGCATCAGTGTCTGAAGAT	21	1	NM_016936	+	1354	1373	2	21	19	9T10	2	ubinuclein 1 (UBN1), transcript variant 1, mRNA
1077298	AAAGCATCAGTGTCTGAAGAT	21	1	NM_001079514	+	851	870	2	21	19	9T10	2	ubinuclein 1 (UBN1), transcript variant 2, mRNA
1081563	AGCCGTTGCAATTCAATCTTG	21	1	NM_002712	+	1270	1289	2	21	19	12C7	2	protein phosphatase 1, regulatory subunit 7 (PPP1R7), mRNA
1088147	CATAAAGCTCCTCTGATACTT	21	1	NM_005335	-	304	324	1	21	19	3A1A15	2	hematopoietic cell-specific Lyn substrate 1 (HCLS1), mRNA
1088643	ATTCTGATGCAGGCATCTCCTG	22	1	NM_173647	-	1107	1128	1	22	20	6AT14	2	ring finger protein 149 (RNF149), mRNA
1091729	TTTTTTGCTTTTTCTGAGGTCT	22	1	NM_005417	-	4089	4110	1	22	20	6GC14	2	v-src sarcoma (Schmidt-Ruppin A-2) viral oncogene homolog (avian) (SRC), transcript variant 1, mRNA
1091729	TTTTTTGCTTTTTCTGAGGTCT	22	1	NM_198291	-	3988	4009	1	22	20	6GC14	2	v-src sarcoma (Schmidt-Ruppin A-2) viral oncogene homolog (avian) (SRC), transcript variant 2, mRNA
1092248	ACTCATCTTCATCAAAGGCATC	22	1	NM_152284	-	643	664	1	22	20	7T9G4	2	charged multivesicular body protein 4C (CHMP4C), mRNA
1099449	TTTCATCCTCAAGCTCCTGCT	21	1	NM_015459	-	1517	1537	1	21	19	4A5A10	2	atlastin GTPase 3 (ATL3), mRNA
1108978	AAGGCAAACTGGAATCTGTAT	21	1	NM_002813	-	2079	2099	1	21	19	7A4A8	2	proteasome (prosome, macropain) 26S subunit, non-ATPase, 9 (PSMD9), mRNA
1109152	TTGAAATGAGAATCAGTGGAA	21	1	NM_014331	+	3056	3075	1	20	19	14A5	2	solute carrier family 7 (anionic amino acid transporter light chain, xc- system), member 11 (SLC7A11), mRNA
1109152	TTGAAATGAGAATCAGTGGAA	21	1	NM_014500	+	738	758	1	21	19	6T7A6	2	HIV-1 Tat specific factor 1 (HTATSF1), transcript variant 2, mRNA
1109152	TTGAAATGAGAATCAGTGGAA	21	1	NM_001163280	+	987	1007	1	21	19	6T7A6	2	HIV-1 Tat specific factor 1 (HTATSF1), transcript variant 1, mRNA
1116127	TTTGAAATGAGAATCAGTGGA	21	1	NM_014331	+	3056	3075	2	21	19	14A5	2	solute carrier family 7 (anionic amino acid transporter light chain, xc- system), member 11 (SLC7A11), mRNA
1116356	AAAAACAGGCTTATGACTTCTT	22	1	NM_032321	+	1984	2005	1	22	20	5C11T4	2	chromosome 2 open reading frame 88 (C2orf88), transcript variant 4, mRNA
1116356	AAAAACAGGCTTATGACTTCTT	22	1	NM_001042519	+	2057	2078	1	22	20	5C11T4	2	chromosome 2 open reading frame 88 (C2orf88), transcript variant 1, mRNA
1116356	AAAAACAGGCTTATGACTTCTT	22	1	NM_001042520	+	2013	2034	1	22	20	5C11T4	2	chromosome 2 open reading frame 88 (C2orf88), transcript variant 3, mRNA
1116356	AAAAACAGGCTTATGACTTCTT	22	1	NM_001042521	+	2025	2046	1	22	20	5C11T4	2	chromosome 2 open reading frame 88 (C2orf88), transcript variant 2, mRNA
1128032	TTCCAGATAAGAAATGCTCCTT	22	1	NM_001040616	+	475	496	1	22	20	7T3A10	2	lines homolog (Drosophila) (LINS), transcript variant 6, mRNA
1134207	CAAGAAAAAGACATAATTCCC	21	1	NM_001025579	+	1143	1163	1	21	19	10A4A5	2	nudE nuclear distribution gene E homolog (A. nidulans)-like 1 (NDEL1), transcript variant 1, mRNA
1135625	TAGATTTTGGGTTGAAAGTCT	21	1	NM_000073	-	716	736	1	21	19	7T3T9	2	CD3g molecule, gamma (CD3-TCR complex) (CD3G), mRNA
1138676	TTCTCAAAGAAACTGCTACATC	22	1	NM_147198	+	631	652	1	22	20	2C5G13	2	WAP four-disulfide core domain 9 (WFDC9), mRNA
1138817	TTCACAGTTCTGTTGTTGCTT	21	1	NM_138333	-	2139	2158	1	20	19	8T11	2	family with sequence similarity 122A (FAM122A), mRNA
1138817	TTCACAGTTCTGTTGTTGCTT	21	1	NM_001251845	+	1319	1339	1	21	19	6G5T8	2	transient receptor potential cation channel, subfamily C, member 1 (TRPC1), transcript variant 1, mRNA
1138817	TTCACAGTTCTGTTGTTGCTT	21	1	NM_003304	+	1217	1237	1	21	19	6G5T8	2	transient receptor potential cation channel, subfamily C, member 1 (TRPC1), transcript variant 2, mRNA
1139419	ATCCTTATCTTTTCCTTTGTT	21	1	NM_001004725	+	631	651	1	21	19	9T6T4	2	olfactory receptor, family 4, subfamily S, member 1 (OR4S1), mRNA
1139900	TTTTTTGCTTTTTCTGAGGTC	21	1	NM_005417	-	4090	4110	1	21	19	6GC13	2	v-src sarcoma (Schmidt-Ruppin A-2) viral oncogene homolog (avian) (SRC), transcript variant 1, mRNA
1139900	TTTTTTGCTTTTTCTGAGGTC	21	1	NM_198291	-	3989	4009	1	21	19	6GC13	2	v-src sarcoma (Schmidt-Ruppin A-2) viral oncogene homolog (avian) (SRC), transcript variant 2, mRNA
1142950	TGAAAAAACTGATAAGACATG	21	1	NM_138573	+	967	986	1	20	19	12T7	2	neuregulin 4 (NRG4), mRNA
1145681	TCAAAAAACAGTGAGCTTTGT	21	1	NM_000553	-	5197	5217	1	21	19	4A9G6	2	Werner syndrome, RecQ helicase-like (WRN), mRNA
1151882	TCAGATTTGACATTTTCTACT	21	1	NM_001099270	-	2978	2997	1	20	19	8G11	2	zinc finger and BTB domain containing 34 (ZBTB34), mRNA
1152006	TTGGAGAAATTTGAAGATTCT	21	1	NM_003139	+	585	604	2	21	19	2G17	2	signal recognition particle receptor (docking protein) (SRPR), transcript variant 1, mRNA
1152006	TTGGAGAAATTTGAAGATTCT	21	1	NM_001177842	+	501	520	2	21	19	2G17	2	signal recognition particle receptor (docking protein) (SRPR), transcript variant 2, mRNA
1154043	ATCATCATGTATTGTTTTCTG	21	1	NM_003647	-	658	677	2	21	19	10T9	2	diacylglycerol kinase, epsilon 64kDa (DGKE), mRNA
1154442	TTATTCTGGAAATATTGCAAAC	22	1	NM_001197218	-	2693	2714	1	22	20	2A5G13	2	phosphodiesterase 4D, cAMP-specific (PDE4D), transcript variant 4, mRNA
1154442	TTATTCTGGAAATATTGCAAAC	22	1	NM_001197219	-	2471	2492	1	22	20	2A5G13	2	phosphodiesterase 4D, cAMP-specific (PDE4D), transcript variant 5, mRNA
1154442	TTATTCTGGAAATATTGCAAAC	22	1	NM_001197220	-	3109	3130	1	22	20	2A5G13	2	phosphodiesterase 4D, cAMP-specific (PDE4D), transcript variant 6, mRNA
1154442	TTATTCTGGAAATATTGCAAAC	22	1	NM_001197221	-	2429	2450	1	22	20	2A5G13	2	phosphodiesterase 4D, cAMP-specific (PDE4D), transcript variant 7, mRNA
1154442	TTATTCTGGAAATATTGCAAAC	22	1	NM_001197222	-	2515	2536	1	22	20	2A5G13	2	phosphodiesterase 4D, cAMP-specific (PDE4D), transcript variant 8, mRNA
1154442	TTATTCTGGAAATATTGCAAAC	22	1	NM_001197223	-	2305	2326	1	22	20	2A5G13	2	phosphodiesterase 4D, cAMP-specific (PDE4D), transcript variant 9, mRNA
1154442	TTATTCTGGAAATATTGCAAAC	22	1	NM_001165899	-	2845	2866	1	22	20	2A5G13	2	phosphodiesterase 4D, cAMP-specific (PDE4D), transcript variant 3, mRNA
1154442	TTATTCTGGAAATATTGCAAAC	22	1	NM_006203	-	2497	2518	1	22	20	2A5G13	2	phosphodiesterase 4D, cAMP-specific (PDE4D), transcript variant 2, mRNA
1154442	TTATTCTGGAAATATTGCAAAC	22	1	NM_001104631	-	2954	2975	1	22	20	2A5G13	2	phosphodiesterase 4D, cAMP-specific (PDE4D), transcript variant 1, mRNA
1166373	TGGGTTTTGTTTTTGTTTTTT	21	1	NM_004674	+	1991	2009	2	20	19	19	2	ash2 (absent, small, or homeotic)-like (Drosophila) (ASH2L), transcript variant 1, mRNA
1166373	TGGGTTTTGTTTTTGTTTTTT	21	1	NR_037858	+	89	107	3	21	19	19	2	uncharacterized LOC254128 (LOC254128), transcript variant 2, non-coding RNA
1166373	TGGGTTTTGTTTTTGTTTTTT	21	1	NR_037857	+	89	107	3	21	19	19	2	uncharacterized LOC254128 (LOC254128), transcript variant 3, non-coding RNA
1166373	TGGGTTTTGTTTTTGTTTTTT	21	1	NM_014654	+	5013	5031	3	21	19	19	2	syndecan 3 (SDC3), mRNA
1166373	TGGGTTTTGTTTTTGTTTTTT	21	1	NM_001412	+	1765	1783	3	21	19	19	2	eukaryotic translation initiation factor 1A, X-linked (EIF1AX), mRNA
1166373	TGGGTTTTGTTTTTGTTTTTT	21	1	NM_001102575	+	2983	3001	2	20	19	19	2	sorting nexin 18 (SNX18), transcript variant 1, mRNA
1166373	TGGGTTTTGTTTTTGTTTTTT	21	1	NM_001105214	+	2054	2072	2	20	19	19	2	ash2 (absent, small, or homeotic)-like (Drosophila) (ASH2L), transcript variant 2, mRNA
1167711	TGTTAAGAACACATGACAACTT	22	1	NM_018965	+	970	991	1	22	20	2T9A9	2	triggering receptor expressed on myeloid cells 2 (TREM2), mRNA
1169782	TCAGACAAGATGAGAGAAATC	21	1	NM_015272	+	6106	6124	1	19	19	19	2	RPGRIP1-like (RPGRIP1L), transcript variant 1, mRNA
1169782	TCAGACAAGATGAGAGAAATC	21	1	NM_001127897	+	5866	5884	1	19	19	19	2	RPGRIP1-like (RPGRIP1L), transcript variant 2, mRNA
1178359	TGTACTTTCGCACCTTGAATT	21	1	NM_020354	+	5171	5191	1	21	19	8C2A9	2	ectonucleoside triphosphate diphosphohydrolase 7 (ENTPD7), mRNA
1179787	ATAAATGTAATTACTACCACT	21	1	NM_005591	-	2903	2923	1	21	19	5T1T13	2	MRE11 meiotic recombination 11 homolog A (S. cerevisiae) (MRE11A), transcript variant 1, mRNA
1179982	TCAGCATGGGGCTTCTGGGATT	22	1	NM_003776	-	500	521	1	22	20	9G5T6	2	mitochondrial ribosomal protein L40 (MRPL40), nuclear gene encoding mitochondrial protein, mRNA
1180612	AAGGTTTTGTCTCCTGCTCAG	21	1	NM_003352	-	153	173	1	21	19	9T6C4	2	SMT3 suppressor of mif two 3 homolog 1 (S. cerevisiae) (SUMO1), transcript variant 1, mRNA
1180612	AAGGTTTTGTCTCCTGCTCAG	21	1	NM_001005781	-	153	173	1	21	19	9T6C4	2	SMT3 suppressor of mif two 3 homolog 1 (S. cerevisiae) (SUMO1), transcript variant 2, mRNA
1180612	AAGGTTTTGTCTCCTGCTCAG	21	1	NR_002190	-	141	161	1	21	19	9T6C4	2	SUMO1 pseudogene 3 (SUMO1P3), non-coding RNA
1184042	GGGATTTGGATGCTGTCTAAG	21	1	NR_015352	+	2417	2437	1	21	19	4TT15	2	cat eye syndrome chromosome region, candidate 7 (non-protein coding) (CECR7), non-coding RNA
1185978	ATTTCAGTAGGATTTCTTTCT	21	1	NM_020117	-	288	308	1	21	19	5A2A12	2	leucyl-tRNA synthetase (LARS), mRNA
1188494	TTCTTTGTATTTGCTGGTCCAG	22	1	NM_153035	+	2706	2727	1	22	20	7T8G5	2	transcription elongation factor A (SII) N-terminal and central domain containing 2 (TCEANC2), mRNA
1188991	TGTGGATGACCAAACATTTTG	21	1	NM_152504	-	398	416	1	19	19	19	2	chromosome 20 open reading frame 196 (C20orf196), mRNA
1190344	TCATACTTTCCTTTTAGCTCT	21	1	NR_037710	-	1632	1652	1	21	19	4A10A5	2	family with sequence similarity 161, member A (FAM161A), transcript variant 3, non-coding RNA
1190344	TCATACTTTCCTTTTAGCTCT	21	1	NM_001201543	-	1856	1876	1	21	19	4A10A5	2	family with sequence similarity 161, member A (FAM161A), transcript variant 1, mRNA
1190344	TCATACTTTCCTTTTAGCTCT	21	1	NM_032180	-	1688	1708	1	21	19	4A10A5	2	family with sequence similarity 161, member A (FAM161A), transcript variant 2, mRNA
1192295	GATGACATGTCTTGGGATTGT	21	1	NM_005275	+	6633	6651	3	21	19	19	2	guanine nucleotide binding protein-like 1 (GNL1), mRNA
1198356	ATCTACCTTAAAATCTTCAAA	21	1	NM_015313	+	3887	3907	1	21	19	11A3T5	2	Rho guanine nucleotide exchange factor (GEF) 12 (ARHGEF12), transcript variant 1, mRNA
1198356	ATCTACCTTAAAATCTTCAAA	21	1	NM_001198665	+	3830	3850	1	21	19	11A3T5	2	Rho guanine nucleotide exchange factor (GEF) 12 (ARHGEF12), transcript variant 2, mRNA
1199184	GATGAAGAATTTGAGGGTCTT	21	1	NM_025114	-	5080	5100	1	21	19	10T3G6	2	centrosomal protein 290kDa (CEP290), mRNA
1200058	CACCTCCTGTGCTGGTATGTC	21	1	NM_005143	+	1055	1075	1	21	19	5C9T5	2	haptoglobin (HP), transcript variant 1, mRNA
1200058	CACCTCCTGTGCTGGTATGTC	21	1	NM_001126102	+	878	898	1	21	19	5C9T5	2	haptoglobin (HP), transcript variant 2, mRNA
59	TTCCTGGAAGATAGACTTTGCC	22	2419	NM_001145065	+	5152	5170	1	19	19	19	3	family with sequence similarity 190, member A (FAM190A), transcript variant 1, mRNA
165	CCCCGAACATCTCATAGAACTT	22	991	NM_004850	+	4525	4545	2	22	19	5A6A8	3	Rho-associated, coiled-coil containing protein kinase 2 (ROCK2), mRNA
239	GGCTTGTCGAGGAAACTGGGAA	22	666	NR_003531	-	1050	1071	1	22	19	9A2AA8	3	maternally expressed 3 (non-protein coding) (MEG3), transcript variant 3, non-coding RNA
239	GGCTTGTCGAGGAAACTGGGAA	22	666	NR_033359	-	1019	1040	1	22	19	9A2AA8	3	maternally expressed 3 (non-protein coding) (MEG3), transcript variant 5, non-coding RNA
331	CTACCAGATTCTGATCTTCCTC	22	513	NM_001410	-	10254	10273	3	22	19	6T13	3	multiple EGF-like-domains 8 (MEGF8), mRNA
419	AAACTGGGAATTCTGAGAATCT	22	403	NM_001847	-	6065	6086	1	22	19	4T4A9T2	3	collagen, type IV, alpha 6 (COL4A6), transcript variant A, mRNA
756	AATAGAGTGGAGCTGAGCAGGA	22	234	NR_027833	+	1866	1887	1	22	19	7T4C2A6	3	apolipoprotein L, 3 (APOL3), transcript variant alpha/a, non-coding RNA
951	TGACCAGATCAAGAAGATGAGC	22	192	NM_016410	+	339	358	2	21	19	2C17	3	charged multivesicular body protein 5 (CHMP5), transcript variant 1, mRNA
951	TGACCAGATCAAGAAGATGAGC	22	192	NM_001195536	+	339	358	2	21	19	2C17	3	charged multivesicular body protein 5 (CHMP5), transcript variant 2, mRNA
951	TGACCAGATCAAGAAGATGAGC	22	192	NM_001649	+	3823	3843	2	22	19	13A1A5	3	shroom family member 2 (SHROOM2), mRNA
951	TGACCAGATCAAGAAGATGAGC	22	192	NM_016408	-	1145	1165	2	22	19	4A4A11	3	CDK5 regulatory subunit associated protein 1 (CDK5RAP1), transcript variant 1, mRNA
951	TGACCAGATCAAGAAGATGAGC	22	192	NM_016082	-	997	1017	2	22	19	4A4A11	3	CDK5 regulatory subunit associated protein 1 (CDK5RAP1), transcript variant 2, mRNA
1032	CCCGAACATCTCATAGAACTTG	22	177	NM_004850	+	4525	4545	1	21	19	5A6A8	3	Rho-associated, coiled-coil containing protein kinase 2 (ROCK2), mRNA
1068	TCAGGTGCCTGGAGATCAGCTC	22	172	NM_000486	-	3046	3067	1	22	19	9T4AT6	3	aquaporin 2 (collecting duct) (AQP2), mRNA
1071	AGACAGGATTGGAGCCACTGAC	22	171	NR_036634	-	709	729	2	22	19	8T4C7	3	transforming growth factor, beta receptor III (TGFBR3), transcript variant 4, non-coding RNA
1071	AGACAGGATTGGAGCCACTGAC	22	171	NM_001195684	-	448	468	2	22	19	8T4C7	3	transforming growth factor, beta receptor III (TGFBR3), transcript variant 3, mRNA
1071	AGACAGGATTGGAGCCACTGAC	22	171	NM_003243	-	612	632	2	22	19	8T4C7	3	transforming growth factor, beta receptor III (TGFBR3), transcript variant 1, mRNA
1071	AGACAGGATTGGAGCCACTGAC	22	171	NM_001195683	-	612	632	2	22	19	8T4C7	3	transforming growth factor, beta receptor III (TGFBR3), transcript variant 2, mRNA
1121	CAGCATCCAAATCCCTTCCTGG	22	164	NM_182645	+	1615	1635	1	21	19	4A4A11	3	vestigial like 2 (Drosophila) (VGLL2), transcript variant 1, mRNA
1121	CAGCATCCAAATCCCTTCCTGG	22	164	NM_153453	+	1109	1129	1	21	19	4A4A11	3	vestigial like 2 (Drosophila) (VGLL2), transcript variant 2, mRNA
1252	AACCTTTGGAACTCTTAGCCAG	22	149	NM_153333	+	1164	1184	2	22	19	4T4A11	3	transcription elongation factor A (SII)-like 8 (TCEAL8), transcript variant 1, mRNA
1252	AACCTTTGGAACTCTTAGCCAG	22	149	NM_001006684	+	1091	1111	2	22	19	4T4A11	3	transcription elongation factor A (SII)-like 8 (TCEAL8), transcript variant 2, mRNA
1252	AACCTTTGGAACTCTTAGCCAG	22	149	NM_152278	+	1139	1159	2	22	19	4T4A11	3	transcription elongation factor A (SII)-like 7 (TCEAL7), mRNA
1285	GATGATCAGTGTTGTCTTGGCT	22	146	NM_020945	-	7029	7049	2	22	19	7G1G11	3	WDFY family member 4 (WDFY4), mRNA
1490	GAAAGGGAAAGAGTATGCTGCT	22	127	NM_173076	+	1080	1101	1	22	19	6G3G3A7	3	ATP-binding cassette, sub-family A (ABC1), member 12 (ABCA12), transcript variant 1, mRNA
1525	TTGTCTCCTGCTCAGCTCCACT	22	124	NM_001003941	-	112	131	2	21	19	7T12	3	oxoglutarate (alpha-ketoglutarate) dehydrogenase (lipoamide) (OGDH), nuclear gene encoding mitochondrial protein, transcript variant 2, mRNA
1525	TTGTCTCCTGCTCAGCTCCACT	22	124	NM_002541	-	112	131	2	21	19	7T12	3	oxoglutarate (alpha-ketoglutarate) dehydrogenase (lipoamide) (OGDH), nuclear gene encoding mitochondrial protein, transcript variant 1, mRNA
1525	TTGTCTCCTGCTCAGCTCCACT	22	124	NM_001165036	-	112	131	2	21	19	7T12	3	oxoglutarate (alpha-ketoglutarate) dehydrogenase (lipoamide) (OGDH), nuclear gene encoding mitochondrial protein, transcript variant 3, mRNA
1525	TTGTCTCCTGCTCAGCTCCACT	22	124	NM_014693	-	894	914	2	22	19	5C10C4	3	endothelin converting enzyme 2 (ECE2), transcript variant 1, mRNA
1525	TTGTCTCCTGCTCAGCTCCACT	22	124	NM_001037324	-	558	578	2	22	19	5C10C4	3	endothelin converting enzyme 2 (ECE2), transcript variant 2, mRNA
1525	TTGTCTCCTGCTCAGCTCCACT	22	124	NM_001100120	-	783	803	2	22	19	5C10C4	3	endothelin converting enzyme 2 (ECE2), transcript variant 4, mRNA
1525	TTGTCTCCTGCTCAGCTCCACT	22	124	NM_001100121	-	645	665	2	22	19	5C10C4	3	endothelin converting enzyme 2 (ECE2), transcript variant 5, mRNA
1530	ACAGCATCCAAATCCCTTCCTG	22	124	NM_182645	+	1615	1635	2	22	19	4A4A11	3	vestigial like 2 (Drosophila) (VGLL2), transcript variant 1, mRNA
1530	ACAGCATCCAAATCCCTTCCTG	22	124	NM_153453	+	1109	1129	2	22	19	4A4A11	3	vestigial like 2 (Drosophila) (VGLL2), transcript variant 2, mRNA
1959	TCAGACAGGATTGGAGCCACTG	22	96	NM_021969	-	575	595	2	22	19	7G4G8	3	nuclear receptor subfamily 0, group B, member 2 (NR0B2), mRNA
2204	TTGAAATGAGAATCAGTGGAAG	22	85	NM_014331	+	3056	3075	1	20	19	14A5	3	solute carrier family 7 (anionic amino acid transporter light chain, xc- system), member 11 (SLC7A11), mRNA
2204	TTGAAATGAGAATCAGTGGAAG	22	85	NM_014500	+	738	758	1	21	19	6T7A6	3	HIV-1 Tat specific factor 1 (HTATSF1), transcript variant 2, mRNA
2204	TTGAAATGAGAATCAGTGGAAG	22	85	NM_001163280	+	987	1007	1	21	19	6T7A6	3	HIV-1 Tat specific factor 1 (HTATSF1), transcript variant 1, mRNA
2543	TTATTGGTACTGTGTTCTTATT	22	75	NM_014910	+	5830	5851	1	22	19	9C2TG8	3	zinc finger protein 507 (ZNF507), transcript variant 2, mRNA
2543	TTATTGGTACTGTGTTCTTATT	22	75	NR_024052	-	3519	3540	1	22	19	6G2C6C5	3	HLA complex group 18 (non-protein coding) (HCG18), non-coding RNA
2543	TTATTGGTACTGTGTTCTTATT	22	75	NR_024053	-	3305	3326	1	22	19	6G2C6C5	3	HLA complex group 18 (non-protein coding) (HCG18), non-coding RNA
2543	TTATTGGTACTGTGTTCTTATT	22	75	NM_001136156	+	5924	5945	1	22	19	9C2TG8	3	zinc finger protein 507 (ZNF507), transcript variant 1, mRNA
2631	CATCCTGCTGAGCTTTGTCACA	22	72	NM_172239	+	1704	1723	1	20	19	16G3	3	REX1, RNA exonuclease 1 homolog (S. cerevisiae)-like 1 (REXO1L1), mRNA
2631	CATCCTGCTGAGCTTTGTCACA	22	72	NR_003594	+	720	739	1	20	19	16G3	3	REX1, RNA exonuclease 1 homolog (S. cerevisiae)-like 2 (pseudogene) (REXO1L2P), non-coding RNA
2763	TGTCTTTTTCTTGGAGCTGGAA	22	69	NM_153373	-	1036	1056	2	22	19	7T1T11	3	alanine-glyoxylate aminotransferase 2-like 2 (AGXT2L2), mRNA
2803	TGCTCATCTTCTTGATCTGGTC	22	68	NM_016410	-	339	358	3	22	19	17G2	3	charged multivesicular body protein 5 (CHMP5), transcript variant 1, mRNA
2803	TGCTCATCTTCTTGATCTGGTC	22	68	NM_001195536	-	339	358	3	22	19	17G2	3	charged multivesicular body protein 5 (CHMP5), transcript variant 2, mRNA
2850	TTTTGTCTGGAAAACCTTGACC	22	67	NM_018538	-	2796	2815	2	21	19	3G16	3	erythroblast membrane-associated protein (Scianna blood group) (ERMAP), transcript variant 2, mRNA
2850	TTTTGTCTGGAAAACCTTGACC	22	67	NM_001017922	-	2900	2919	2	21	19	3G16	3	erythroblast membrane-associated protein (Scianna blood group) (ERMAP), transcript variant 1, mRNA
3121	TTCCATTCTGAACAATAGTTTT	22	62	NM_020771	-	3439	3459	2	22	19	8GA11	3	HECT domain and ankyrin repeat containing, E3 ubiquitin protein ligase 1 (HACE1), mRNA
3156	TATGTCTTTTTCTTGGAGCTGG	22	61	NM_003484	-	1080	1100	2	22	19	4C2T13	3	high mobility group AT-hook 2 (HMGA2), transcript variant 2, mRNA
3361	TTTGTCTTTATCAGCTCTGGGT	22	58	NM_001622	+	104	124	1	21	19	8TA11	3	alpha-2-HS-glycoprotein (AHSG), mRNA
3361	TTTGTCTTTATCAGCTCTGGGT	22	58	NM_000065	-	337	358	1	22	19	7T1A2A9	3	complement component 6 (C6), transcript variant 1, mRNA
3361	TTTGTCTTTATCAGCTCTGGGT	22	58	NM_001115131	-	392	413	1	22	19	7T1A2A9	3	complement component 6 (C6), transcript variant 2, mRNA
3426	TACCATAAAGAAAACTTCAGAC	22	57	NM_020662	-	1472	1491	1	20	19	9G10	3	MRS2 magnesium homeostasis factor homolog (S. cerevisiae) (MRS2), mRNA
3440	AAATAGGGATATACACATGCTG	22	57	NM_015213	-	1269	1289	2	22	19	8T3C8	3	DENN/MADD domain containing 5A (DENND5A), transcript variant 1, mRNA
3440	AAATAGGGATATACACATGCTG	22	57	NM_001243254	-	1269	1289	2	22	19	8T3C8	3	DENN/MADD domain containing 5A (DENND5A), transcript variant 2, mRNA
3498	CAGGAAGGGATTTGGATGCTGT	22	56	NM_182645	-	1615	1635	1	21	19	11T4T4	3	vestigial like 2 (Drosophila) (VGLL2), transcript variant 1, mRNA
3498	CAGGAAGGGATTTGGATGCTGT	22	56	NM_153453	-	1109	1129	1	21	19	11T4T4	3	vestigial like 2 (Drosophila) (VGLL2), transcript variant 2, mRNA
3500	ACCAGATCAAGAAGATGAGCAT	22	56	NM_001649	+	3824	3844	1	21	19	12A1A6	3	shroom family member 2 (SHROOM2), mRNA
4002	TCTGAAGGTCATGTCAGTGGCT	22	49	NM_002471	-	1701	1719	3	21	19	19	3	myosin, heavy chain 6, cardiac muscle, alpha (MYH6), mRNA
4053	TTCCCAGTTTCCTCGACAAGCC	22	49	NR_003531	+	1050	1071	1	22	19	8TT2T9	3	maternally expressed 3 (non-protein coding) (MEG3), transcript variant 3, non-coding RNA
4053	TTCCCAGTTTCCTCGACAAGCC	22	49	NR_033359	+	1019	1040	1	22	19	8TT2T9	3	maternally expressed 3 (non-protein coding) (MEG3), transcript variant 5, non-coding RNA
4063	ATGCCAGGACTGAAACCAAAAC	22	49	NM_173576	+	1652	1672	1	21	19	2G15A2	3	mohawk homeobox (MKX), transcript variant 1, mRNA
4063	ATGCCAGGACTGAAACCAAAAC	22	49	NM_001242702	+	1649	1669	1	21	19	2G15A2	3	mohawk homeobox (MKX), transcript variant 2, mRNA
4128	CTTTTCCTAAGGCTTCCCTGGT	22	48	NR_038872	+	522	541	1	20	19	8A11	3	long intergenic non-protein coding RNA 317 (LINC00317), non-coding RNA
4185	ATGCTCATCTTCTTGATCTGGT	22	47	NM_001649	-	3824	3844	2	22	19	6T1T12	3	shroom family member 2 (SHROOM2), mRNA
4280	TCGGATCTTCCTAACAACTGCT	22	46	NM_004079	+	2609	2628	3	22	19	10A9	3	cathepsin S (CTSS), transcript variant 1, mRNA
4280	TCGGATCTTCCTAACAACTGCT	22	46	NM_001199739	+	2459	2478	3	22	19	10A9	3	cathepsin S (CTSS), transcript variant 2, mRNA
4400	TGCTACCAGATTCTGATCTTCC	22	45	NR_038864	+	1892	1913	1	22	19	4A9G4T2	3	uncharacterized LOC401324 (LOC401324), non-coding RNA
4510	AGAGATTGTGGATGATGATATC	22	45	NM_080588	-	304	323	1	20	19	15T4	3	protein tyrosine phosphatase, non-receptor type 7 (PTPN7), transcript variant 2, mRNA
4615	TGTCTCCTGCTCAGCTCCACTC	22	44	NM_001003941	-	112	131	1	20	19	7T12	3	oxoglutarate (alpha-ketoglutarate) dehydrogenase (lipoamide) (OGDH), nuclear gene encoding mitochondrial protein, transcript variant 2, mRNA
4615	TGTCTCCTGCTCAGCTCCACTC	22	44	NM_002541	-	112	131	1	20	19	7T12	3	oxoglutarate (alpha-ketoglutarate) dehydrogenase (lipoamide) (OGDH), nuclear gene encoding mitochondrial protein, transcript variant 1, mRNA
4615	TGTCTCCTGCTCAGCTCCACTC	22	44	NM_001165036	-	112	131	1	20	19	7T12	3	oxoglutarate (alpha-ketoglutarate) dehydrogenase (lipoamide) (OGDH), nuclear gene encoding mitochondrial protein, transcript variant 3, mRNA
4615	TGTCTCCTGCTCAGCTCCACTC	22	44	NM_014693	-	894	914	1	21	19	5C10C4	3	endothelin converting enzyme 2 (ECE2), transcript variant 1, mRNA
4615	TGTCTCCTGCTCAGCTCCACTC	22	44	NM_001037324	-	558	578	1	21	19	5C10C4	3	endothelin converting enzyme 2 (ECE2), transcript variant 2, mRNA
4615	TGTCTCCTGCTCAGCTCCACTC	22	44	NM_001100120	-	783	803	1	21	19	5C10C4	3	endothelin converting enzyme 2 (ECE2), transcript variant 4, mRNA
4615	TGTCTCCTGCTCAGCTCCACTC	22	44	NM_001100121	-	645	665	1	21	19	5C10C4	3	endothelin converting enzyme 2 (ECE2), transcript variant 5, mRNA
4679	TTGAGGATTTGTACAATAATGT	22	43	NM_001242865	-	4359	4380	1	22	19	10G4A1A4	3	protein arginine methyltransferase 2 (PRMT2), transcript variant 4, mRNA
4752	CCAGAATGCAAAGATCCAAGAT	22	42	NR_039982	-	4215	4233	4	22	19	19	3	uncharacterized LOC283547 (LOC283547), non-coding RNA
4771	TCAATGATTGTCTAGGCAGAAT	22	42	NR_027291	+	1686	1707	1	22	19	11CT1G7	3	nucleosome assembly protein 1-like 6 (NAP1L6), non-coding RNA
4996	ATGTTTTCTGATTTAAAGGAGC	22	40	NR_024606	+	1791	1812	1	22	19	6T4T4A5	3	uncharacterized LOC151534 (LOC151534), non-coding RNA
5056	TAATGCTGGGAGGTAGCTTACC	22	40	NM_001730	-	2362	2383	1	22	19	5C2G6G6	3	Kruppel-like factor 5 (intestinal) (KLF5), mRNA
5074	TTTCCATCATGTTATGAAACTG	22	40	NM_000769	-	577	598	1	22	19	9T4T4C2	3	cytochrome P450, family 2, subfamily C, polypeptide 19 (CYP2C19), mRNA
5215	ATGTCTTTTTCTTGGAGCTGGA	22	39	NM_003484	-	1080	1100	1	21	19	4C2T13	3	high mobility group AT-hook 2 (HMGA2), transcript variant 2, mRNA
5392	TCTTTTTCTTGGAGCTGGAATC	22	38	NM_012311	-	1100	1120	1	21	19	8T3A8	3	KIN, antigenic determinant of recA protein homolog (mouse) (KIN), transcript variant 1, mRNA
5392	TCTTTTTCTTGGAGCTGGAATC	22	38	NR_045609	-	1100	1120	1	21	19	8T3A8	3	KIN, antigenic determinant of recA protein homolog (mouse) (KIN), transcript variant 3, non-coding RNA
5392	TCTTTTTCTTGGAGCTGGAATC	22	38	NR_045610	-	1005	1025	1	21	19	8T3A8	3
5466	TTTTGTTTGCACTGATTGCTCT	22	37	NM_001302	+	282	302	1	21	19	6TT13	3	cortistatin (CORT), mRNA
5512	GCAACAACAGAACTGTAAATTC	22	37	NM_138333	+	2140	2160	1	21	19	10A5A4	3	family with sequence similarity 122A (FAM122A), mRNA
5525	AAAAGTCTTGAAGTTGAATGCT	22	37	NM_014139	-	4792	4810	1	19	19	19	3	sodium channel, voltage-gated, type XI, alpha subunit (SCN11A), mRNA
5863	ATTATTTCTACTTTGGCATCTG	22	35	NM_033026	-	10919	10938	1	20	19	11T8	3	piccolo (presynaptic cytomatrix protein) (PCLO), transcript variant 1, mRNA
5863	ATTATTTCTACTTTGGCATCTG	22	35	NM_014510	-	10919	10938	1	20	19	11T8	3	piccolo (presynaptic cytomatrix protein) (PCLO), transcript variant 2, mRNA
5979	ATAGCTCATGGACCTGACAGCC	22	34	NM_207122	-	3064	3083	1	20	19	12C7	3	exostosin 2 (EXT2), transcript variant 2, mRNA
5979	ATAGCTCATGGACCTGACAGCC	22	34	NM_001178083	-	3094	3113	1	20	19	12C7	3	exostosin 2 (EXT2), transcript variant 3, mRNA
5979	ATAGCTCATGGACCTGACAGCC	22	34	NM_000401	-	2885	2904	1	20	19	12C7	3	exostosin 2 (EXT2), transcript variant 1, mRNA
6074	TTTAGTTGTACCTGATTGCTCT	22	34	NM_173651	-	14703	14724	1	22	19	6T3C4T6	3	fibrous sheath interacting protein 2 (FSIP2), mRNA
6313	CAGGGAAGCCTTAGGAAAAGTT	22	32	NR_038872	-	522	541	1	20	19	11T8	3	long intergenic non-protein coding RNA 317 (LINC00317), non-coding RNA
6313	CAGGGAAGCCTTAGGAAAAGTT	22	32	NM_004319	-	6855	6875	1	21	19	4G4C11	3	astrotactin 1 (ASTN1), transcript variant 1, mRNA
6342	GTAGAAACAAAATGATAGGATT	22	32	NM_001813	+	6959	6978	3	22	19	5C14	3	centromere protein E, 312kDa (CENPE), mRNA
6621	TAGCCAAGACAACACTGATCAT	22	31	NM_020945	+	7029	7049	2	22	19	11C1C7	3	WDFY family member 4 (WDFY4), mRNA
6736	AACTGATAGCTCATGGACCTGA	22	31	NR_002323	+	5204	5225	1	22	19	6T4C3G6	3	taurine upregulated 1 (non-protein coding) (TUG1), non-coding RNA
6991	CGGATCTTCCTAACAACTGCTT	22	30	NM_004079	+	2609	2628	2	21	19	10A9	3	cathepsin S (CTSS), transcript variant 1, mRNA
6991	CGGATCTTCCTAACAACTGCTT	22	30	NM_001199739	+	2459	2478	2	21	19	10A9	3	cathepsin S (CTSS), transcript variant 2, mRNA
7315	CTTCCCTGGTGTCATACTTCTT	22	28	NM_005407	+	3574	3595	1	22	19	12C1TA6	3	sal-like 2 (Drosophila) (SALL2), mRNA
7337	AGAGCTGATCTCCAGGCACCTG	22	28	NM_152279	-	5394	5413	1	20	19	4C15	3	zinc finger protein 585B (ZNF585B), mRNA
7337	AGAGCTGATCTCCAGGCACCTG	22	28	NM_000486	+	3045	3066	1	22	19	7AT4A8	3	aquaporin 2 (collecting duct) (AQP2), mRNA
7499	TTCTGAAGGTCATGTCAGTGGC	22	28	NM_002471	-	1701	1719	4	22	19	19	3	myosin, heavy chain 6, cardiac muscle, alpha (MYH6), mRNA
7499	TTCTGAAGGTCATGTCAGTGGC	22	28	NM_015144	+	4780	4801	1	22	19	9T3GT7	3	zinc finger, CCHC domain containing 14 (ZCCHC14), mRNA
7618	CCATGAATGGCTGTACTGTTTC	22	27	NM_023071	-	1180	1200	1	21	19	9GC10	3	spermatogenesis associated, serine-rich 2 (SPATS2), mRNA
7857	GTGGCTCCAATCCTGTCTGAAG	22	27	NM_021969	+	577	598	1	22	19	6C4C7A2	3	nuclear receptor subfamily 0, group B, member 2 (NR0B2), mRNA
8029	ACAACAGAACTGTAAATTCTCT	22	26	NM_016107	-	4372	4391	3	22	19	16C3	3	zinc finger RNA binding protein (ZFR), mRNA
8246	TCATTCAGACAAAAGCTTCAGT	22	25	NM_018428	-	1172	1192	2	22	19	5A4A10	3	UTP6, small subunit (SSU) processome component, homolog (yeast) (UTP6), mRNA
8557	CCAGGAAGGGATTTGGATGCTG	22	25	NM_182645	-	1615	1635	2	22	19	11T4T4	3	vestigial like 2 (Drosophila) (VGLL2), transcript variant 1, mRNA
8557	CCAGGAAGGGATTTGGATGCTG	22	25	NM_153453	-	1109	1129	2	22	19	11T4T4	3	vestigial like 2 (Drosophila) (VGLL2), transcript variant 2, mRNA
8761	AACTTGGTACTGGTTCTCCACT	22	24	NM_173564	-	3179	3200	1	22	19	7TA3G9	3	neuronal tyrosine-phosphorylated phosphoinositide-3-kinase adaptor 1 (NYAP1), mRNA
8945	AAGCGGGATCAAAAAGAAAGAA	22	24	NR_033900	+	647	667	1	21	19	5G9G5	3	uncharacterized LOC285441 (LOC285441), non-coding RNA
8945	AAGCGGGATCAAAAAGAAAGAA	22	24	NM_000128	-	2424	2444	1	21	19	5G9G5	3	coagulation factor XI (F11), mRNA
9090	AACAGGCAAAACTTGCAGAACT	22	23	NM_004519	+	4131	4151	1	21	19	11C2G6	3	potassium voltage-gated channel, KQT-like subfamily, member 3 (KCNQ3), transcript variant 1, mRNA
9090	AACAGGCAAAACTTGCAGAACT	22	23	NM_001204824	+	3582	3602	1	21	19	11C2G6	3	potassium voltage-gated channel, KQT-like subfamily, member 3 (KCNQ3), transcript variant 2, mRNA
9236	AGCCAAGACAACACTGATCATC	22	23	NM_020945	+	7029	7049	1	21	19	11C1C7	3	WDFY family member 4 (WDFY4), mRNA
9256	TTTCAGATGGCATGTTGGGATC	22	23	NR_002591	-	9	28	3	22	19	17A2	3	small nucleolar RNA, C/D box 95 (SNORD95), small nucleolar RNA
9423	TTCACTGTATCTTGTAGAAAAG	22	23	NM_001135805	+	4604	4623	1	20	19	3A16	3	synaptotagmin I (SYT1), transcript variant 2, mRNA
9423	TTCACTGTATCTTGTAGAAAAG	22	23	NM_001135806	+	4190	4209	1	20	19	3A16	3	synaptotagmin I (SYT1), transcript variant 3, mRNA
9423	TTCACTGTATCTTGTAGAAAAG	22	23	NM_005639	+	4590	4609	1	20	19	3A16	3	synaptotagmin I (SYT1), transcript variant 1, mRNA
9933	TATCAAATCTAAGATTGCTTCT	22	22	NR_038381	-	911	931	2	22	19	6T4G9	3	TSC22D1 antisense RNA 1 (non-protein coding) (TSC22D1-AS1), non-coding RNA
10484	CTGCTCAGCTCCACTCTATTGG	22	20	NM_015011	+	3302	3323	1	22	19	10C2C1C6	3	myosin XVI (MYO16), transcript variant 2, mRNA
10484	CTGCTCAGCTCCACTCTATTGG	22	20	NM_004982	-	15	36	1	22	19	11C4TA4	3	potassium inwardly-rectifying channel, subfamily J, member 8 (KCNJ8), mRNA
10484	CTGCTCAGCTCCACTCTATTGG	22	20	NM_001198950	+	3864	3885	1	22	19	10C2C1C6	3	myosin XVI (MYO16), transcript variant 1, mRNA
10758	ACCTGAAATTGTAGTTATCTCT	22	20	NM_015447	+	7564	7584	2	22	19	15A2T2	3	calmodulin regulated spectrin-associated protein 1 (CAMSAP1), mRNA
10857	ACTGATAGCTCATGGACCTGAC	22	20	NR_002323	+	5205	5226	1	22	19	5T4C3G7	3	taurine upregulated 1 (non-protein coding) (TUG1), non-coding RNA
10860	TAGGAGGTCAATGCTCAAGGAT	22	20	NM_015910	+	3079	3100	1	22	19	7T3T3C6	3	WD repeat containing planar cell polarity effector (WDPCP), mRNA
11364	TTCCACAGAAATATCCGGATTG	22	19	NM_001002860	+	3140	3159	2	21	19	7A12	3	BTB (POZ) domain containing 7 (BTBD7), transcript variant 1, mRNA
11385	CATAACAGTGTTGAGACAGCTT	22	19	NM_001206557	+	5540	5560	2	22	19	8G2G9	3	KIAA1432 (KIAA1432), transcript variant 3, mRNA
11385	CATAACAGTGTTGAGACAGCTT	22	19	NM_020829	+	5651	5671	2	22	19	8G2G9	3	KIAA1432 (KIAA1432), transcript variant 1, mRNA
11422	GCTCATCTTCTTGATCTGGTCA	22	19	NM_016410	-	339	358	2	21	19	17G2	3	charged multivesicular body protein 5 (CHMP5), transcript variant 1, mRNA
11422	GCTCATCTTCTTGATCTGGTCA	22	19	NM_001195536	-	339	358	2	21	19	17G2	3	charged multivesicular body protein 5 (CHMP5), transcript variant 2, mRNA
11422	GCTCATCTTCTTGATCTGGTCA	22	19	NM_001649	-	3823	3843	1	21	19	5T1T13	3	shroom family member 2 (SHROOM2), mRNA
11422	GCTCATCTTCTTGATCTGGTCA	22	19	NM_016408	+	1145	1165	1	21	19	11T4T4	3	CDK5 regulatory subunit associated protein 1 (CDK5RAP1), transcript variant 1, mRNA
11422	GCTCATCTTCTTGATCTGGTCA	22	19	NM_016082	+	997	1017	1	21	19	11T4T4	3	CDK5 regulatory subunit associated protein 1 (CDK5RAP1), transcript variant 2, mRNA
11851	CAGAAATGTTTAAAGCTGTCTC	22	18	NR_027055	+	1580	1599	2	21	19	13G6	3	family with sequence similarity 41, member C (FAM41C), non-coding RNA
11995	ATGAATGAAGATCAGGTGAAGA	22	18	NR_003268	+	777	798	1	22	19	11T2GG6	3	CTAGE family, member 10, pseudogene (CTAGE10P), non-coding RNA
12100	CCTTCTTCCTCTTCTTCAACTG	22	18	NM_003715	-	2973	2992	3	22	19	3T16	3	USO1 vesicle docking protein homolog (yeast) (USO1), mRNA
12527	CAACCACAGATTGTTTTCCTAG	22	17	NM_207014	-	1061	1080	1	20	19	17C2	3	WD repeat domain 78 (WDR78), transcript variant 2, mRNA
12527	CAACCACAGATTGTTTTCCTAG	22	17	NM_024763	-	1061	1080	1	20	19	17C2	3	WD repeat domain 78 (WDR78), transcript variant 1, mRNA
12604	TTGTCTTTATCAGCTCTGGGTG	22	17	NM_019897	-	117	137	2	22	19	7AT12	3	olfactory receptor, family 2, subfamily S, member 2 (OR2S2), mRNA
12663	GGAAGATAGACTTTGCCAGGGG	22	17	NM_001137560	-	1924	1945	1	22	19	6TA4T9	3	transmembrane protein 151B (TMEM151B), mRNA
12788	GCATGCTGTCGAACTAATGGCA	22	17	NM_015245	-	1250	1270	2	22	19	9G3T7	3	ankyrin repeat and sterile alpha motif domain containing 1A (ANKS1A), mRNA
12834	GAGCAGTATTTCTTTGAAACCT	22	17	NM_006854	+	1261	1282	1	22	19	4A6C7C2	3	KDEL (Lys-Asp-Glu-Leu) endoplasmic reticulum protein retention receptor 2 (KDELR2), transcript variant 1, mRNA
12834	GAGCAGTATTTCTTTGAAACCT	22	17	NM_001100603	+	1008	1029	1	22	19	4A6C7C2	3	KDEL (Lys-Asp-Glu-Leu) endoplasmic reticulum protein retention receptor 2 (KDELR2), transcript variant 2, mRNA
12922	TTCTGGGATTATATTAAAAGCC	22	17	NM_001007267	-	4358	4377	1	20	19	12A7	3	phospholipase A2 receptor 1, 180kDa (PLA2R1), transcript variant 2, mRNA
12985	GACCAGATCAAGAAGATGAGCA	22	17	NM_016410	+	339	358	1	20	19	2C17	3	charged multivesicular body protein 5 (CHMP5), transcript variant 1, mRNA
12985	GACCAGATCAAGAAGATGAGCA	22	17	NM_001195536	+	339	358	1	20	19	2C17	3	charged multivesicular body protein 5 (CHMP5), transcript variant 2, mRNA
13000	AACTTTTCCTAAGGCTTCCCTG	22	17	NR_038872	+	522	541	3	22	19	8A11	3	long intergenic non-protein coding RNA 317 (LINC00317), non-coding RNA
13000	AACTTTTCCTAAGGCTTCCCTG	22	17	NM_004319	+	6855	6875	2	22	19	11G4C4	3	astrotactin 1 (ASTN1), transcript variant 1, mRNA
13632	ACTTTGGCATCTGTGGCTCTGA	22	16	NM_133638	-	2891	2911	1	21	19	5G1C13	3	ADAM metallopeptidase with thrombospondin type 1 motif, 19 (ADAMTS19), mRNA
13802	CCCTTCCTGGAAGATAGACTTT	22	16	NM_001145065	+	5152	5170	4	22	19	19	3	family with sequence similarity 190, member A (FAM190A), transcript variant 1, mRNA
14401	TTTGCTTAAAATCGTTGTTACC	22	15	NM_001145357	+	5146	5166	1	21	19	12CG7	3	SIN3 transcription regulator homolog A (yeast) (SIN3A), transcript variant 3, mRNA
14401	TTTGCTTAAAATCGTTGTTACC	22	15	NM_001145358	+	5321	5341	1	21	19	12CG7	3	SIN3 transcription regulator homolog A (yeast) (SIN3A), transcript variant 1, mRNA
14401	TTTGCTTAAAATCGTTGTTACC	22	15	NM_015477	+	5223	5243	1	21	19	12CG7	3	SIN3 transcription regulator homolog A (yeast) (SIN3A), transcript variant 2, mRNA
14529	AGGGATATACACATGCTGAGAA	22	15	NM_016587	+	306	327	1	22	19	6A4C7G2	3	chromobox homolog 3 (CBX3), transcript variant 2, mRNA
14913	TCCTGCTCAGCTCCACTCTATT	22	15	NR_027833	-	1866	1887	1	22	19	6T2G4A7	3	apolipoprotein L, 3 (APOL3), transcript variant alpha/a, non-coding RNA
[truncated: 1,446 more rows]

## Sheet: Table S2
sRNA ID	sRNA seq	sRNA len	sRNA abundance	human mRNA ID	Map strand	human start	end	sRNA start	end	matched nt in aligned region	map pattern	# Mismatches	human gene annot
131627	TATGAATGTGCTGATTGTGGA	21	1	NM_003408	+	1157	1176	1	20	19	14T5	1	zinc finger protein 37 homolog (mouse) (ZFP37), mRNA
131627	TATGAATGTGCTGATTGTGGA	21	1	NM_152455	+	2179	2198	1	20	19	3G16	1	zinc finger and SCAN domain containing 29 (ZSCAN29), mRNA
142795	TGCTAAAAAGATGTTGAGATAG	22	1	NM_001202855	+	1233	1252	1	20	19	3T16	1	cytochrome P450, family 3, subfamily A, polypeptide 4 (CYP3A4), transcript variant 2, mRNA
142795	TGCTAAAAAGATGTTGAGATAG	22	1	NM_017460	+	1236	1255	1	20	19	3T16	1	cytochrome P450, family 3, subfamily A, polypeptide 4 (CYP3A4), transcript variant 1, mRNA
183631	ACAAATGGCAACAATTATGTTT	22	1	NM_000222	+	1776	1795	3	22	19	6C13	1	v-kit Hardy-Zuckerman 4 feline sarcoma viral oncogene homolog (KIT), transcript variant 1, mRNA
183631	ACAAATGGCAACAATTATGTTT	22	1	NM_001093772	+	1764	1783	3	22	19	6C13	1	v-kit Hardy-Zuckerman 4 feline sarcoma viral oncogene homolog (KIT), transcript variant 2, mRNA
209805	ACTTGTGTCTGATCTCTTTGGT	22	1	NM_001010872	-	2564	2583	3	22	19	11C8	1	family with sequence similarity 83, member B (FAM83B), mRNA
256101	TTGCTAAAAAGATGTTGAGATA	22	1	NM_001202855	+	1233	1252	2	21	19	3T16	1	cytochrome P450, family 3, subfamily A, polypeptide 4 (CYP3A4), transcript variant 2, mRNA
256101	TTGCTAAAAAGATGTTGAGATA	22	1	NM_017460	+	1236	1255	2	21	19	3T16	1	cytochrome P450, family 3, subfamily A, polypeptide 4 (CYP3A4), transcript variant 1, mRNA
461812	CACAAAATCGTCCCTTAGGAGA	22	1	NM_024086	-	322	341	3	22	19	7G12	1	methyltransferase like 16 (METTL16), mRNA
71188	TCCTGTTTCTTTCCTTTATATT	22	1	NM_016072	+	900	920	2	22	19	11C4A4	2	golgi transport 1B (GOLT1B), mRNA
91864	ATTGTGCAATGTGAGATATTG	21	1	NM_016507	+	7725	7745	1	21	19	5G5T9	2	cyclin-dependent kinase 12 (CDK12), transcript variant 1, mRNA
91864	ATTGTGCAATGTGAGATATTG	21	1	NM_015083	+	7698	7718	1	21	19	5G5T9	2	cyclin-dependent kinase 12 (CDK12), transcript variant 2, mRNA
131627	TATGAATGTGCTGATTGTGGA	21	1	NM_006958	+	1734	1754	1	21	19	9G4T6	2	zinc finger protein 16 (ZNF16), transcript variant 1, mRNA
131627	TATGAATGTGCTGATTGTGGA	21	1	NM_001172638	+	572	592	1	21	19	10C3T6	2	zinc finger protein 62 homolog (mouse) (ZFP62), transcript variant 2, mRNA
218496	TCTGACCAGCCTTGTTTACAGC	22	1	NM_145239	+	1444	1464	2	22	19	4C1A14	2	proline-rich transmembrane protein 2 (PRRT2), transcript variant 1, mRNA
218496	TCTGACCAGCCTTGTTTACAGC	22	1	NM_001256442	+	1606	1626	2	22	19	4C1A14	2	proline-rich transmembrane protein 2 (PRRT2), transcript variant 2, mRNA
218496	TCTGACCAGCCTTGTTTACAGC	22	1	NM_001256443	+	2033	2053	2	22	19	4C1A14	2	proline-rich transmembrane protein 2 (PRRT2), transcript variant 3, mRNA
221189	GTTGGACAAGAATGGAAATTTT	22	1	NM_004096	-	6824	6844	2	22	19	4A10A5	2	eukaryotic translation initiation factor 4E binding protein 2 (EIF4EBP2), mRNA
227045	GGGTTTTGGATGCTATGGAAGG	22	1	NR_036441	+	242	262	2	22	19	4T6C9	2	vaccinia related kinase 2 (VRK2), transcript variant 6, non-coding RNA
227045	GGGTTTTGGATGCTATGGAAGG	22	1	NM_006296	+	247	267	2	22	19	4T6C9	2	vaccinia related kinase 2 (VRK2), transcript variant 1, mRNA
227045	GGGTTTTGGATGCTATGGAAGG	22	1	NM_001130480	+	242	262	2	22	19	4T6C9	2	vaccinia related kinase 2 (VRK2), transcript variant 2, mRNA
227045	GGGTTTTGGATGCTATGGAAGG	22	1	NM_001130482	+	188	208	2	22	19	4T6C9	2	vaccinia related kinase 2 (VRK2), transcript variant 4, mRNA
227045	GGGTTTTGGATGCTATGGAAGG	22	1	NM_001130483	+	242	262	2	22	19	4T6C9	2	vaccinia related kinase 2 (VRK2), transcript variant 5, mRNA
227045	GGGTTTTGGATGCTATGGAAGG	22	1	NM_001130481	+	84	104	2	22	19	4T6C9	2	vaccinia related kinase 2 (VRK2), transcript variant 3, mRNA
268227	ACAACTCAAGGAAAGAAAAGA	21	1	NM_032359	+	320	340	1	21	19	5TC14	2	chromosome 3 open reading frame 26 (C3orf26), transcript variant 1, mRNA
268227	ACAACTCAAGGAAAGAAAAGA	21	1	NM_001167924	+	179	199	1	21	19	5TC14	2	chromosome 3 open reading frame 26 (C3orf26), transcript variant 2, mRNA
272410	CTGGAATTTGACTGTACCAAAG	22	1	NM_006743	+	3413	3433	1	21	19	6T3A10	2	RNA binding motif (RNP1, RRM) protein 3 (RBM3), mRNA
307149	GTCAGAAGAGGACATTGAAAGG	22	1	NM_203395	+	5335	5355	2	22	19	6G6T7	2	iodotyrosine deiodinase (IYD), transcript variant 2, mRNA
307149	GTCAGAAGAGGACATTGAAAGG	22	1	NM_001164694	+	5447	5467	2	22	19	6G6T7	2	iodotyrosine deiodinase (IYD), transcript variant 1, mRNA
307149	GTCAGAAGAGGACATTGAAAGG	22	1	NM_001164695	+	5396	5416	2	22	19	6G6T7	2	iodotyrosine deiodinase (IYD), transcript variant 3, mRNA
311474	TCAGTTGGACAAGAATGGAAAT	22	1	NM_032606	+	1563	1583	2	22	19	12A1T6	2	calcyphosine 2 (CAPS2), mRNA
396264	TTGCTGTTTTGGCACAAGAGTG	22	1	NM_000696	+	1038	1058	1	21	19	7TT12	2	aldehyde dehydrogenase 9 family, member A1 (ALDH9A1), mRNA
514786	CAAAGGACTCAGAGATTATAGT	22	1	NR_037859	-	2381	2402	1	22	20	15T2T3	2	PIR-FIGF readthrough (PIR-FIGF), non-coding RNA
514786	CAAAGGACTCAGAGATTATAGT	22	1	NM_004469	-	1873	1894	1	22	20	15T2T3	2	c-fos induced growth factor (vascular endothelial growth factor D) (FIGF), mRNA
331045	GAGTGACACTGGACATAGACTG	22	1	NM_003427	+	2515	2536	1	22	19	5A1A3G10	3	zinc finger protein 76 (ZNF76), mRNA
396264	TTGCTGTTTTGGCACAAGAGTG	22	1	NM_022970	-	1712	1733	1	22	19	14CA1G4	3	fibroblast growth factor receptor 2 (FGFR2), transcript variant 2, mRNA
396264	TTGCTGTTTTGGCACAAGAGTG	22	1	NM_001144913	-	1215	1236	1	22	19	14CA1G4	3	fibroblast growth factor receptor 2 (FGFR2), transcript variant 3, mRNA
396264	TTGCTGTTTTGGCACAAGAGTG	22	1	NM_001144919	-	1445	1466	1	22	19	14CA1G4	3	fibroblast growth factor receptor 2 (FGFR2), transcript variant 9, mRNA
418231	CTCATTATTGATTCAGATGGCT	22	1	NR_024170	-	1442	1463	1	22	19	9G5GA5	3	late endosomal/lysosomal adaptor, MAPK and MTOR activator 3 (LAMTOR3), transcript variant 2, non-coding RNA
418231	CTCATTATTGATTCAGATGGCT	22	1	NM_021970	-	1488	1509	1	22	19	9G5GA5	3	late endosomal/lysosomal adaptor, MAPK and MTOR activator 3 (LAMTOR3), transcript variant 1, mRNA
418231	CTCATTATTGATTCAGATGGCT	22	1	NM_001243736	-	1467	1488	1	22	19	9G5GA5	3	late endosomal/lysosomal adaptor, MAPK and MTOR activator 3 (LAMTOR3), transcript variant 3, mRNA
442141	TGATGAGCGAACAAAGAAAAGA	22	1	NM_001206927	-	3273	3294	1	22	19	7C3C4A5	3	dynein, axonemal, heavy chain 8 (DNAH8), mRNA
476998	TGGTTATTGGGACATCTGGTGA	22	1	NM_003829	+	7238	7259	1	22	19	2G6G4T7	3	multiple PDZ domain protein (MPDZ), mRNA
478958	TTGGCTTTAATGGGTACTCAAC	22	1	NM_003141	-	47	68	1	22	19	9AT3T7	3	tripartite motif containing 21 (TRIM21), mRNA

## Sheet: Table S3
sRNA ID	sRNA seq	sRNA len	sRNA abundance	human mRNA ID	Map strand	human start	end	sRNA start	end	matched nt in aligned region	map pattern	# Mismatches	human gene annot
6725	CCTTCTAGAACACATATGGGC	21	24	NM_021235	+	939	959	1	21	20	8A12	1	epidermal growth factor receptor pathway substrate 15-like 1 (EPS15L1), mRNA
8113	TTCATGAACTTCTTTCCATCCC	22	20	NR_033393	-	387	408	1	22	21	18T3	1	TROVE domain family, member 2 (TROVE2), non-coding RNA
8113	TTCATGAACTTCTTTCCATCCC	22	20	NM_001042369	-	982	1003	1	22	21	18T3	1	TROVE domain family, member 2 (TROVE2), transcript variant 1, mRNA
8113	TTCATGAACTTCTTTCCATCCC	22	20	NM_001173524	-	988	1009	1	22	21	18T3	1	TROVE domain family, member 2 (TROVE2), transcript variant 5, mRNA
8113	TTCATGAACTTCTTTCCATCCC	22	20	NM_004600	-	982	1003	1	22	21	18T3	1	TROVE domain family, member 2 (TROVE2), transcript variant 2, mRNA
8113	TTCATGAACTTCTTTCCATCCC	22	20	NM_001042370	-	982	1003	1	22	21	18T3	1	TROVE domain family, member 2 (TROVE2), transcript variant 3, mRNA
8113	TTCATGAACTTCTTTCCATCCC	22	20	NM_001173525	-	982	1003	1	22	21	18T3	1	TROVE domain family, member 2 (TROVE2), transcript variant 4, mRNA
20796	ATTGCTTCTCTTGCCCTATTT	21	8	NM_207333	+	4830	4850	1	21	20	8T12	1	zinc finger protein 320 (ZNF320), mRNA
27621	AAATCCTGGTTTGTGTCTCCC	21	6	NM_016848	+	2937	2957	1	21	20	2A18	1	SHC (Src homology 2 domain containing) transforming protein 3 (SHC3), mRNA
28934	AAAAGCATCCAACAGCCAGCT	21	6	NM_016282	-	478	498	1	21	20	4G16	1	adenylate kinase 3 (AK3), nuclear gene encoding mitochondrial protein, transcript	variant 1, mRNA
28934	AAAAGCATCCAACAGCCAGCT	21	6	NM_001199853	-	177	197	1	21	20	4G16	1	adenylate kinase 3 (AK3), transcript variant 3, mRNA
28934	AAAAGCATCCAACAGCCAGCT	21	6	NM_001199855	-	184	204	1	21	20	4G16	1	adenylate kinase 3 (AK3), transcript variant 5, mRNA
28934	AAAAGCATCCAACAGCCAGCT	21	6	NM_001199856	-	250	270	1	21	20	4G16	1	adenylate kinase 3 (AK3), transcript variant 6, mRNA
31828	TTCATGAACTTCTTTCCATCC	21	5	NR_033393	-	388	408	1	21	20	18T2	1	TROVE domain family, member 2 (TROVE2), non-coding RNA
31828	TTCATGAACTTCTTTCCATCC	21	5	NM_001042369	-	983	1003	1	21	20	18T2	1	TROVE domain family, member 2 (TROVE2), transcript variant 1, mRNA
31828	TTCATGAACTTCTTTCCATCC	21	5	NM_001173524	-	989	1009	1	21	20	18T2	1	TROVE domain family, member 2 (TROVE2), transcript variant 5, mRNA
31828	TTCATGAACTTCTTTCCATCC	21	5	NM_004600	-	983	1003	1	21	20	18T2	1	TROVE domain family, member 2 (TROVE2), transcript variant 2, mRNA
31828	TTCATGAACTTCTTTCCATCC	21	5	NM_001042370	-	983	1003	1	21	20	18T2	1	TROVE domain family, member 2 (TROVE2), transcript variant 3, mRNA
31828	TTCATGAACTTCTTTCCATCC	21	5	NM_001173525	-	983	1003	1	21	20	18T2	1	TROVE domain family, member 2 (TROVE2), transcript variant 4, mRNA
44892	GGGATGGAAAGAAGTTCATGAA	22	4	NR_033393	+	387	408	1	22	21	3A18	1	TROVE domain family, member 2 (TROVE2), non-coding RNA
44892	GGGATGGAAAGAAGTTCATGAA	22	4	NM_001042369	+	982	1003	1	22	21	3A18	1	TROVE domain family, member 2 (TROVE2), transcript variant 1, mRNA
44892	GGGATGGAAAGAAGTTCATGAA	22	4	NM_001173524	+	988	1009	1	22	21	3A18	1	TROVE domain family, member 2 (TROVE2), transcript variant 5, mRNA
44892	GGGATGGAAAGAAGTTCATGAA	22	4	NM_004600	+	982	1003	1	22	21	3A18	1	TROVE domain family, member 2 (TROVE2), transcript variant 2, mRNA
44892	GGGATGGAAAGAAGTTCATGAA	22	4	NM_001042370	+	982	1003	1	22	21	3A18	1	TROVE domain family, member 2 (TROVE2), transcript variant 3, mRNA
44892	GGGATGGAAAGAAGTTCATGAA	22	4	NM_001173525	+	982	1003	1	22	21	3A18	1	TROVE domain family, member 2 (TROVE2), transcript variant 4, mRNA
47200	CAAAATCGTCCCTTAGGAGAG	21	4	NM_024086	-	321	341	1	21	20	7G13	1	methyltransferase like 16 (METTL16), mRNA
51005	TTTGTTTGCGTTTGTTTTGTT	21	3	NM_173683	-	2378	2398	1	21	20	8C12	1	XK, Kell blood group complex subunit-related family, member 6 (XKR6), transcript	variant 2, mRNA
62504	TCATGAACTTCTTTCCATCCC	21	3	NR_033393	-	387	407	1	21	20	17T3	1	TROVE domain family, member 2 (TROVE2), non-coding RNA
62504	TCATGAACTTCTTTCCATCCC	21	3	NM_001042369	-	982	1002	1	21	20	17T3	1	TROVE domain family, member 2 (TROVE2), transcript variant 1, mRNA
62504	TCATGAACTTCTTTCCATCCC	21	3	NM_001173524	-	988	1008	1	21	20	17T3	1	TROVE domain family, member 2 (TROVE2), transcript variant 5, mRNA
62504	TCATGAACTTCTTTCCATCCC	21	3	NM_004600	-	982	1002	1	21	20	17T3	1	TROVE domain family, member 2 (TROVE2), transcript variant 2, mRNA
62504	TCATGAACTTCTTTCCATCCC	21	3	NM_001042370	-	982	1002	1	21	20	17T3	1	TROVE domain family, member 2 (TROVE2), transcript variant 3, mRNA
62504	TCATGAACTTCTTTCCATCCC	21	3	NM_001173525	-	982	1002	1	21	20	17T3	1	TROVE domain family, member 2 (TROVE2), transcript variant 4, mRNA
63238	GGACTACTTTTCCTTTTGACC	21	3	NM_001172574	-	2152	2172	1	21	20	9T11	1	microcephalin 1 (MCPH1), transcript variant 2, mRNA
63238	GGACTACTTTTCCTTTTGACC	21	3	NM_001172575	-	2008	2028	1	21	20	9T11	1	microcephalin 1 (MCPH1), transcript variant 3, mRNA
65586	GGTCAAAAGGAAAAGTAGTCC	21	3	NM_001172574	+	2152	2172	1	21	20	11A9	1	microcephalin 1 (MCPH1), transcript variant 2, mRNA
65586	GGTCAAAAGGAAAAGTAGTCC	21	3	NM_001172575	+	2008	2028	1	21	20	11A9	1	microcephalin 1 (MCPH1), transcript variant 3, mRNA
70912	TTTCTTTGCTGTGCTCACAAT	21	3	NM_005224	-	2343	2363	1	21	20	12G8	1	AT rich interactive domain 3A (BRIGHT-like) (ARID3A), mRNA
74509	CCATCAATTTCATTAAATATG	21	2	NM_018246	-	1366	1386	1	21	20	11A9	1	coiled-coil domain containing 25 (CCDC25), mRNA
99633	GAAAAGCATCCAACAGCCAGCT	22	2	NM_016282	-	478	499	1	22	21	5G16	1	adenylate kinase 3 (AK3), nuclear gene encoding mitochondrial protein, transcript	variant 1, mRNA
99633	GAAAAGCATCCAACAGCCAGCT	22	2	NM_001199853	-	177	198	1	22	21	5G16	1	adenylate kinase 3 (AK3), transcript variant 3, mRNA
99633	GAAAAGCATCCAACAGCCAGCT	22	2	NM_001199855	-	184	205	1	22	21	5G16	1	adenylate kinase 3 (AK3), transcript variant 5, mRNA
99633	GAAAAGCATCCAACAGCCAGCT	22	2	NM_001199856	-	250	271	1	22	21	5G16	1	adenylate kinase 3 (AK3), transcript variant 6, mRNA
100976	AAAAGCATCCAACAGCCAGCTA	22	2	NM_016282	-	477	498	1	22	21	4G17	1	adenylate kinase 3 (AK3), nuclear gene encoding mitochondrial protein, transcript	variant 1, mRNA
100976	AAAAGCATCCAACAGCCAGCTA	22	2	NM_001199853	-	176	197	1	22	21	4G17	1	adenylate kinase 3 (AK3), transcript variant 3, mRNA
100976	AAAAGCATCCAACAGCCAGCTA	22	2	NM_001199855	-	183	204	1	22	21	4G17	1	adenylate kinase 3 (AK3), transcript variant 5, mRNA
100976	AAAAGCATCCAACAGCCAGCTA	22	2	NM_001199856	-	249	270	1	22	21	4G17	1	adenylate kinase 3 (AK3), transcript variant 6, mRNA
109154	CAAAGAAATTCTTCTCTGAATC	22	2	NM_001373	-	13170	13191	1	22	21	10C11	1	dynein, axonemal, heavy chain 14 (DNAH14), transcript variant 1, mRNA
114971	GCTGGCTGTTGGATGCTTTTC	21	2	NM_016282	+	479	499	1	21	20	15C5	1	adenylate kinase 3 (AK3), nuclear gene encoding mitochondrial protein, transcript	variant 1, mRNA
114971	GCTGGCTGTTGGATGCTTTTC	21	2	NM_001199853	+	178	198	1	21	20	15C5	1	adenylate kinase 3 (AK3), transcript variant 3, mRNA
114971	GCTGGCTGTTGGATGCTTTTC	21	2	NM_001199855	+	185	205	1	21	20	15C5	1	adenylate kinase 3 (AK3), transcript variant 5, mRNA
114971	GCTGGCTGTTGGATGCTTTTC	21	2	NM_001199856	+	251	271	1	21	20	15C5	1	adenylate kinase 3 (AK3), transcript variant 6, mRNA
115073	AGCTTTTGTATCTGTCTTTTCT	22	2	NM_001008388	-	1966	1987	1	22	21	11C10	1	CDGSH iron sulfur domain 2 (CISD2), mRNA
115213	TCCACCTCATATTCTTCCTCA	21	2	NM_001142769	-	4889	4909	1	21	20	3A17	1	protocadherin-related 15 (PCDH15), transcript variant I, mRNA
115213	TCCACCTCATATTCTTCCTCA	21	2	NM_001142771	-	4868	4888	1	21	20	3A17	1	protocadherin-related 15 (PCDH15), transcript variant K, mRNA
115213	TCCACCTCATATTCTTCCTCA	21	2	NM_001142770	-	4924	4944	1	21	20	3A17	1	protocadherin-related 15 (PCDH15), transcript variant J, mRNA
115213	TCCACCTCATATTCTTCCTCA	21	2	NM_001142772	-	4853	4873	1	21	20	3A17	1	protocadherin-related 15 (PCDH15), transcript variant L, mRNA
120607	ATATGAATGTGCTGATTGTGG	21	2	NM_152455	+	2178	2198	1	21	20	4G16	1	zinc finger and SCAN domain containing 29 (ZSCAN29), mRNA
130192	AGCTGGCTGTTGGATGCTTTT	21	2	NM_016282	+	478	498	1	21	20	16C4	1	adenylate kinase 3 (AK3), nuclear gene encoding mitochondrial protein, transcript	variant 1, mRNA
130192	AGCTGGCTGTTGGATGCTTTT	21	2	NM_001199853	+	177	197	1	21	20	16C4	1	adenylate kinase 3 (AK3), transcript variant 3, mRNA
130192	AGCTGGCTGTTGGATGCTTTT	21	2	NM_001199855	+	184	204	1	21	20	16C4	1	adenylate kinase 3 (AK3), transcript variant 5, mRNA
130192	AGCTGGCTGTTGGATGCTTTT	21	2	NM_001199856	+	250	270	1	21	20	16C4	1	adenylate kinase 3 (AK3), transcript variant 6, mRNA
136380	AGCTGGCTGTTGGATGCTTTTC	22	2	NM_016282	+	478	499	1	22	21	16C5	1	adenylate kinase 3 (AK3), nuclear gene encoding mitochondrial protein, transcript	variant 1, mRNA
136380	AGCTGGCTGTTGGATGCTTTTC	22	2	NM_001199853	+	177	198	1	22	21	16C5	1	adenylate kinase 3 (AK3), transcript variant 3, mRNA
136380	AGCTGGCTGTTGGATGCTTTTC	22	2	NM_001199855	+	184	205	1	22	21	16C5	1	adenylate kinase 3 (AK3), transcript variant 5, mRNA
136380	AGCTGGCTGTTGGATGCTTTTC	22	2	NM_001199856	+	250	271	1	22	21	16C5	1	adenylate kinase 3 (AK3), transcript variant 6, mRNA
186222	GTTTGTTTGCGTTTGTTTTGTT	22	1	NM_173683	-	2378	2399	1	22	21	9C12	1	XK, Kell blood group complex subunit-related family, member 6 (XKR6), transcript	variant 2, mRNA
203784	TTTGTTTGCGTTTGTTTTGTTT	22	1	NM_173683	-	2377	2398	1	22	21	8C13	1	XK, Kell blood group complex subunit-related family, member 6 (XKR6), transcript	variant 2, mRNA
231488	AGAAAAGACAGATACAAAAGCT	22	1	NM_001008388	+	1966	1987	1	22	21	10G11	1	CDGSH iron sulfur domain 2 (CISD2), mRNA
239795	ATATTTAATGAAATTGATGGTG	22	1	NM_018246	+	1367	1388	1	22	21	8T13	1	coiled-coil domain containing 25 (CCDC25), mRNA
509386	GCCCATATGTGTTCTAGAAGG	21	1	NM_021235	-	939	959	1	21	20	12T8	1	epidermal growth factor receptor pathway substrate 15-like 1 (EPS15L1), mRNA
545878	TTGTTTGCGTTTGTTTTGTTT	21	1	NM_173683	-	2377	2397	1	21	20	7C13	1	XK, Kell blood group complex subunit-related family, member 6 (XKR6), transcript	variant 2, mRNA
545878	TTGTTTGCGTTTGTTTTGTTT	21	1	NM_005744	-	2049	2069	1	21	20	7C13	1	ariadne homolog, ubiquitin-conjugating enzyme E2 binding protein, 1 (Drosophila)	(ARIH1), mRNA
569809	TAGCTGGCTGTTGGATGCTTT	21	1	NM_016282	+	477	497	1	21	20	17C3	1	adenylate kinase 3 (AK3), nuclear gene encoding mitochondrial protein, transcript	variant 1, mRNA
569809	TAGCTGGCTGTTGGATGCTTT	21	1	NM_001199853	+	176	196	1	21	20	17C3	1	adenylate kinase 3 (AK3), transcript variant 3, mRNA
569809	TAGCTGGCTGTTGGATGCTTT	21	1	NM_001199855	+	183	203	1	21	20	17C3	1	adenylate kinase 3 (AK3), transcript variant 5, mRNA
569809	TAGCTGGCTGTTGGATGCTTT	21	1	NM_001199856	+	249	269	1	21	20	17C3	1	adenylate kinase 3 (AK3), transcript variant 6, mRNA
619852	GCTTTTGTATCTGTCTTTTCT	21	1	NM_001008388	-	1966	1986	1	21	20	10C10	1	CDGSH iron sulfur domain 2 (CISD2), mRNA
637667	AAATAGGGCAAGAGAAGCAAT	21	1	NM_207333	-	4830	4850	1	21	20	12A8	1	zinc finger protein 320 (ZNF320), mRNA
652465	CAAAGAAATTCTTCTCTGAAT	21	1	NM_001373	-	13171	13191	1	21	20	10C10	1	dynein, axonemal, heavy chain 14 (DNAH14), transcript variant 1, mRNA
677836	TATATGAATGTGCTGATTGTG	21	1	NR_028393	+	5401	5421	1	21	20	3A17	1	TSNAX-DISC1 readthrough (TSNAX-DISC1), transcript variant 1, non-coding RNA
677836	TATATGAATGTGCTGATTGTG	21	1	NM_018662	+	4788	4808	1	21	20	3A17	1	disrupted in schizophrenia 1 (DISC1), transcript variant L, mRNA
677836	TATATGAATGTGCTGATTGTG	21	1	NM_001012957	+	4722	4742	1	21	20	3A17	1	disrupted in schizophrenia 1 (DISC1), transcript variant Lv, mRNA
677836	TATATGAATGTGCTGATTGTG	21	1	NM_001164537	+	4884	4904	1	21	20	3A17	1	disrupted in schizophrenia 1 (DISC1), transcript variant a, mRNA
677836	TATATGAATGTGCTGATTGTG	21	1	NM_001164540	+	4422	4442	1	21	20	3A17	1	disrupted in schizophrenia 1 (DISC1), transcript variant d, mRNA
703573	GTTTGTTTGCGTTTGTTTTGT	21	1	NM_173683	-	2379	2399	1	21	20	9C11	1	XK, Kell blood group complex subunit-related family, member 6 (XKR6), transcript	variant 2, mRNA
805007	TGAGGAAGAATATGAGGTGGA	21	1	NM_001142769	+	4889	4909	1	21	20	17T3	1	protocadherin-related 15 (PCDH15), transcript variant I, mRNA
805007	TGAGGAAGAATATGAGGTGGA	21	1	NM_001142771	+	4868	4888	1	21	20	17T3	1	protocadherin-related 15 (PCDH15), transcript variant K, mRNA
805007	TGAGGAAGAATATGAGGTGGA	21	1	NM_001142770	+	4924	4944	1	21	20	17T3	1	protocadherin-related 15 (PCDH15), transcript variant J, mRNA
805007	TGAGGAAGAATATGAGGTGGA	21	1	NM_001142772	+	4853	4873	1	21	20	17T3	1	protocadherin-related 15 (PCDH15), transcript variant L, mRNA
825380	AAGTTTTTCCTCTTGCGTTTT	21	1	NM_152292	-	514	534	1	21	20	2G18	1	RNA (guanine-9-) methyltransferase domain containing 2 (RG9MTD2), transcript vari	ant 1, mRNA
825380	AAGTTTTTCCTCTTGCGTTTT	21	1	NM_001134665	-	344	364	1	21	20	2G18	1	RNA (guanine-9-) methyltransferase domain containing 2 (RG9MTD2), transcript vari	ant 2, mRNA
825380	AAGTTTTTCCTCTTGCGTTTT	21	1	NM_001134666	-	333	353	1	21	20	2G18	1	RNA (guanine-9-) methyltransferase domain containing 2 (RG9MTD2), transcript vari	ant 3, mRNA
458	CCTTCTAGAACACATATGGGCT	22	257	NM_021235	+	939	959	1	21	20	8A12	2	epidermal growth factor receptor pathway substrate 15-like 1 (EPS15L1), mRNA
480	TCCAATGGATGGTTCTGAATCC	22	245	NM_001042537	+	2119	2140	1	22	20	11G7T2	2	solute carrier family 9 (sodium/hydrogen exchanger), member 6 (SLC9A6), transcrip	t variant 1, mRNA
480	TCCAATGGATGGTTCTGAATCC	22	245	NM_006359	+	2023	2044	1	22	20	11G7T2	2	solute carrier family 9 (sodium/hydrogen exchanger), member 6 (SLC9A6), transcrip	t variant 2, mRNA
480	TCCAATGGATGGTTCTGAATCC	22	245	NM_001177651	+	1997	2018	1	22	20	11G7T2	2	solute carrier family 9 (sodium/hydrogen exchanger), member 6 (SLC9A6), transcrip	t variant 3, mRNA
511	TACAGACATCACTTCCAGAAG	21	233	NM_006784	-	3424	3444	1	21	19	9C4C6	2	WD repeat domain 3 (WDR3), mRNA
825	CAGACATCACTTCCAGAAGAG	21	157	NM_003801	-	1962	1982	1	21	19	4CA15	2	glycosylphosphatidylinositol anchor attachment protein 1 homolog (yeast) (GPAA1),	mRNA
963	CCTTGAGACAAGCAAAGAACC	21	141	NM_002924	+	1276	1295	2	21	19	6A13	2	regulator of G-protein signaling 7 (RGS7), mRNA
1009	TCACACAATAGCGTTTAACTGT	22	136	NM_014839	-	4953	4974	1	22	20	12G4A4	2	lipid phosphate phosphatase-related protein type 4 (LPPR4), transcript variant 1,	mRNA
1009	TCACACAATAGCGTTTAACTGT	22	136	NM_001166252	-	4779	4800	1	22	20	12G4A4	2	lipid phosphate phosphatase-related protein type 4 (LPPR4), transcript variant 2,	mRNA
1315	TCTACCAAGTCTCTGTATCCT	21	106	NM_014458	-	1022	1042	1	21	19	15T2C2	2	kelch-like 20 (Drosophila) (KLHL20), mRNA
1385	TTGTGTCTGATCTCTTTGGTA	21	102	NM_001010872	-	2564	2583	1	20	19	11C8	2	family with sequence similarity 83, member B (FAM83B), mRNA
1511	CTCCCAACTAAGATCCTTGATG	22	94	NM_007145	-	979	1000	1	22	20	12AT8	2	zinc finger protein 146 (ZNF146), transcript variant 1, mRNA
1511	CTCCCAACTAAGATCCTTGATG	22	94	NM_001099638	-	905	926	1	22	20	12AT8	2	zinc finger protein 146 (ZNF146), transcript variant 2, mRNA
1511	CTCCCAACTAAGATCCTTGATG	22	94	NM_001099639	-	864	885	1	22	20	12AT8	2	zinc finger protein 146 (ZNF146), transcript variant 3, mRNA
1516	TCCCAACTAAGATCCTTGATG	21	94	NM_007145	-	979	999	1	21	19	11AT8	2	zinc finger protein 146 (ZNF146), transcript variant 1, mRNA
1516	TCCCAACTAAGATCCTTGATG	21	94	NM_001099638	-	905	925	1	21	19	11AT8	2	zinc finger protein 146 (ZNF146), transcript variant 2, mRNA
1516	TCCCAACTAAGATCCTTGATG	21	94	NM_001099639	-	864	884	1	21	19	11AT8	2	zinc finger protein 146 (ZNF146), transcript variant 3, mRNA
1662	TTGAGAGAGTCAGAAATGATG	21	86	NM_014640	-	3642	3662	1	21	19	6G8A5	2	tubulin tyrosine ligase-like family, member 4 (TTLL4), mRNA
1666	ACAAAATCGTCCCTTAGGAGA	21	86	NM_024086	-	322	341	2	21	19	7G12	2	methyltransferase like 16 (METTL16), mRNA
1694	TCTGTGTACAAAGGACTCAGA	21	85	NM_018339	+	2232	2252	1	21	19	8C4G7	2	riboflavin kinase (RFK), mRNA
2057	TCTTGAATATGCGCTGCTTTCT	22	72	NM_147127	-	3703	3724	1	22	20	4G7G9	2	Ellis van Creveld syndrome 2 (EVC2), transcript variant 1, mRNA
2057	TCTTGAATATGCGCTGCTTTCT	22	72	NM_001166136	-	4141	4162	1	22	20	4G7G9	2	Ellis van Creveld syndrome 2 (EVC2), transcript variant 2, mRNA
2273	CAAAACCCATCTTTCCTTTCTG	22	65	NM_001177876	+	1611	1632	1	22	20	6C10T4	2	proprotein convertase subtilisin/kexin type 1 (PCSK1), transcript variant 3, mRNA
2273	CAAAACCCATCTTTCCTTTCTG	22	65	NM_001177875	+	2365	2386	1	22	20	6C10T4	2	proprotein convertase subtilisin/kexin type 1 (PCSK1), transcript variant 2, mRNA
2273	CAAAACCCATCTTTCCTTTCTG	22	65	NM_000439	+	2707	2728	1	22	20	6C10T4	2	proprotein convertase subtilisin/kexin type 1 (PCSK1), transcript variant 1, mRNA
2310	TTGAAAGTGTCTGCAACTCCT	21	64	NM_015515	+	1758	1776	2	20	19	19	2	keratin 23 (histone deacetylase inducible) (KRT23), mRNA
2558	CAAAGGACTCAGAGATTATAGT	22	59	NR_037859	-	2381	2402	1	22	20	15T2T3	2	PIR-FIGF readthrough (PIR-FIGF), non-coding RNA
2558	CAAAGGACTCAGAGATTATAGT	22	59	NM_004469	-	1873	1894	1	22	20	15T2T3	2	c-fos induced growth factor (vascular endothelial growth factor D) (FIGF), mRNA
2688	GAAGACTCTGAGACTGTTGCGC	22	56	NM_016075	-	3868	3889	1	22	20	15G3C2	2	vacuolar protein sorting 36 homolog (S. cerevisiae) (VPS36), mRNA
2770	TATGTCCAGTGTCACTCCATT	21	55	NM_032783	+	2134	2154	1	21	19	3G1C15	2	carbonyl reductase 4 (CBR4), mRNA
2937	CATGTATGGAGTTGAGCCAGA	21	52	NM_019893	-	1310	1330	1	21	19	5A4G10	2	N-acylsphingosine amidohydrolase (non-lysosomal ceramidase) 2 (ASAH2), transcript	variant 1, mRNA
3134	ATGGCTTGATGTGACATGAAC	21	49	NM_001005404	+	3619	3639	1	21	19	4C5G10	2	yippee-like 2 (Drosophila) (YPEL2), mRNA
3180	AAAACCCATCTTTCCTTTCTGC	22	48	NM_001177876	+	1612	1633	1	22	20	5C10T5	2	proprotein convertase subtilisin/kexin type 1 (PCSK1), transcript variant 3, mRNA
3180	AAAACCCATCTTTCCTTTCTGC	22	48	NM_001177875	+	2366	2387	1	22	20	5C10T5	2	proprotein convertase subtilisin/kexin type 1 (PCSK1), transcript variant 2, mRNA
3180	AAAACCCATCTTTCCTTTCTGC	22	48	NM_000439	+	2708	2729	1	22	20	5C10T5	2	proprotein convertase subtilisin/kexin type 1 (PCSK1), transcript variant 1, mRNA
3233	CTCCGGAACTTCCTCAATTCCT	22	47	NM_003194	-	165	186	1	22	20	3C1G16	2	TATA box binding protein (TBP), transcript variant 1, mRNA
3379	TCATGCTGTAATTCTCTGGCT	21	46	NM_153710	+	1062	1082	1	21	19	6T1T12	2	chromosome 9 open reading frame 96 (C9orf96), mRNA
3576	AATCTGTTTCCTCCTGTTTCCT	22	43	NR_033373	+	2273	2294	1	22	20	10C4G6	2	uncharacterized FLJ39534 (FLJ39534), non-coding RNA
3663	ACAACAAGGGAGTTAAAGAACT	22	42	NM_018976	-	1626	1647	1	22	20	8G6A6	2	solute carrier family 38, member 2 (SLC38A2), mRNA
3995	AAACCCATCTTTCCTTTCTGC	21	39	NM_001177876	+	1613	1633	1	21	19	4C10T5	2	proprotein convertase subtilisin/kexin type 1 (PCSK1), transcript variant 3, mRNA
3995	AAACCCATCTTTCCTTTCTGC	21	39	NM_001177875	+	2367	2387	1	21	19	4C10T5	2	proprotein convertase subtilisin/kexin type 1 (PCSK1), transcript variant 2, mRNA
3995	AAACCCATCTTTCCTTTCTGC	21	39	NM_000439	+	2709	2729	1	21	19	4C10T5	2	proprotein convertase subtilisin/kexin type 1 (PCSK1), transcript variant 1, mRNA
4008	CAAATCCTGGTTTGTGTCTCCC	22	39	NM_016848	+	2937	2957	2	22	20	2A18	2	SHC (Src homology 2 domain containing) transforming protein 3 (SHC3), mRNA
4039	AAACTAGAAATGCTGAACTTC	21	38	NM_003339	+	1239	1259	1	21	19	11G3A5	2	ubiquitin-conjugating enzyme E2D 2 (UBE2D2), transcript variant 1, mRNA
4039	AAACTAGAAATGCTGAACTTC	21	38	NM_181838	+	1403	1423	1	21	19	11G3A5	2	ubiquitin-conjugating enzyme E2D 2 (UBE2D2), transcript variant 2, mRNA
4176	ATGGCTTGATGTGACATGAACC	22	37	NM_001005404	+	3619	3640	1	22	20	4C5G11	2	yippee-like 2 (Drosophila) (YPEL2), mRNA
4180	ACTGTGTCATGGCAAGAAGCTG	22	37	NM_001202858	+	19	40	1	22	20	4T9A7	2	extracellular matrix protein 1 (ECM1), transcript variant 3, mRNA
4180	ACTGTGTCATGGCAAGAAGCTG	22	37	NM_022664	+	19	40	1	22	20	4T9A7	2	extracellular matrix protein 1 (ECM1), transcript variant 2, mRNA
4180	ACTGTGTCATGGCAAGAAGCTG	22	37	NM_004425	+	19	40	1	22	20	4T9A7	2	extracellular matrix protein 1 (ECM1), transcript variant 1, mRNA
4564	AAAGCGTTGAAGGTATTGGCA	21	34	NM_014240	-	2467	2487	1	21	19	4C6G9	2	LIM domains containing 1 (LIMD1), mRNA
4724	GAAGATGTCTCTGCGCAAGCT	21	33	NM_002747	+	1810	1830	1	21	19	5T1T13	2	mitogen-activated protein kinase 4 (MAPK4), mRNA
4859	CACACAATAGCGTTTAACTGT	21	32	NM_014839	-	4953	4973	1	21	19	11G4A4	2	lipid phosphate phosphatase-related protein type 4 (LPPR4), transcript variant 1,	mRNA
4859	CACACAATAGCGTTTAACTGT	21	32	NM_001166252	-	4779	4799	1	21	19	11G4A4	2	lipid phosphate phosphatase-related protein type 4 (LPPR4), transcript variant 2,	mRNA
4908	TTCTTTCCTTGAGTTGTGACT	21	32	NM_001242614	-	3509	3528	2	21	19	12T7	2	CD99 molecule-like 2 (CD99L2), transcript variant 5, mRNA
4908	TTCTTTCCTTGAGTTGTGACT	21	32	NM_134445	-	3263	3282	2	21	19	12T7	2	CD99 molecule-like 2 (CD99L2), transcript variant 3, mRNA
4908	TTCTTTCCTTGAGTTGTGACT	21	32	NM_031462	-	3479	3498	2	21	19	12T7	2	CD99 molecule-like 2 (CD99L2), transcript variant 1, mRNA
4908	TTCTTTCCTTGAGTTGTGACT	21	32	NM_134446	-	3332	3351	2	21	19	12T7	2	CD99 molecule-like 2 (CD99L2), transcript variant 2, mRNA
4908	TTCTTTCCTTGAGTTGTGACT	21	32	NM_001184808	-	3260	3279	2	21	19	12T7	2	CD99 molecule-like 2 (CD99L2), transcript variant 4, mRNA
4908	TTCTTTCCTTGAGTTGTGACT	21	32	NM_003895	-	2198	2218	1	21	19	7C4G8	2	synaptojanin 1 (SYNJ1), transcript variant 1, mRNA
4908	TTCTTTCCTTGAGTTGTGACT	21	32	NM_203446	-	2198	2218	1	21	19	7C4G8	2	synaptojanin 1 (SYNJ1), transcript variant 2, mRNA
4908	TTCTTTCCTTGAGTTGTGACT	21	32	NM_001160302	-	2206	2226	1	21	19	7C4G8	2	synaptojanin 1 (SYNJ1), transcript variant 3, mRNA
4908	TTCTTTCCTTGAGTTGTGACT	21	32	NM_001160306	-	2191	2211	1	21	19	7C4G8	2	synaptojanin 1 (SYNJ1), transcript variant 4, mRNA
4944	TATGTTTGCATATTGGAGCTCT	22	32	NM_020782	+	3802	3823	1	22	20	14GG6	2	kelch domain containing 5 (KLHDC5), mRNA
4990	TAGCATCATTTCTGACTCTCT	21	31	NM_001032395	+	6369	6389	1	21	19	8T3T8	2	G protein-coupled receptor 126 (GPR126), transcript variant b2, mRNA
4990	TAGCATCATTTCTGACTCTCT	21	31	NM_001032394	+	6415	6435	1	21	19	8T3T8	2	G protein-coupled receptor 126 (GPR126), transcript variant a2, mRNA
4990	TAGCATCATTTCTGACTCTCT	21	31	NM_020455	+	6499	6519	1	21	19	8T3T8	2	G protein-coupled receptor 126 (GPR126), transcript variant a1, mRNA
4990	TAGCATCATTTCTGACTCTCT	21	31	NM_198569	+	6453	6473	1	21	19	8T3T8	2	G protein-coupled receptor 126 (GPR126), transcript variant b1, mRNA
5098	AGGATACAGAGACTTGGTAGA	21	31	NM_014458	+	1022	1042	1	21	19	2G2A15	2	kelch-like 20 (Drosophila) (KLHL20), mRNA
5376	ATGCTGAACTTCCACGTATCT	21	29	NM_138817	+	691	711	1	21	19	14CG5	2	solute carrier family 7 (anionic amino acid transporter), member 13 (SLC7A13), mR	NA
5378	CACAGACTTGCTCTCAACCTCC	22	29	NM_152620	-	875	896	1	22	20	11T3A6	2	tripartite motif containing 60 (TRIM60), mRNA
5571	TTGGACAAGAATGGAAATTTT	21	28	NM_004096	-	6824	6844	1	21	19	4A10A5	2	eukaryotic translation initiation factor 4E binding protein 2 (EIF4EBP2), mRNA
5721	ACCAAAGAGATCAGACACAAG	21	28	NM_001010872	+	2564	2583	1	20	19	8G11	2	family with sequence similarity 83, member B (FAM83B), mRNA
6161	TATATACATAGCCAAAAGGTC	21	26	NM_019857	+	2762	2781	1	20	19	13A6	2	CTP synthase II (CTPS2), transcript variant 1, mRNA
6161	TATATACATAGCCAAAAGGTC	21	26	NM_175859	+	2865	2884	1	20	19	13A6	2	CTP synthase II (CTPS2), transcript variant 2, mRNA
6161	TATATACATAGCCAAAAGGTC	21	26	NM_001144002	+	3252	3271	1	20	19	13A6	2	CTP synthase II (CTPS2), transcript variant 3, mRNA
6494	CAACAAGGGAGTTAAAGAACT	21	25	NM_018976	-	1626	1646	1	21	19	7G6A6	2	solute carrier family 38, member 2 (SLC38A2), mRNA
6755	CTTGAGACAAGCAAAGAACCC	21	24	NM_002924	+	1276	1295	1	20	19	6A13	2	regulator of G-protein signaling 7 (RGS7), mRNA
6851	CTTTAACCACATGCTTCGTCA	21	23	NM_016817	-	3200	3219	1	20	19	16C3	2	2'-5'-oligoadenylate synthetase 2, 69/71kDa (OAS2), transcript variant 1, mRNA
6890	TGGCTGTCCACTGTTGTTCCC	21	23	NM_153840	-	2624	2643	1	20	19	12G7	2	G protein-coupled receptor 110 (GPR110), transcript variant 1, mRNA
7032	AATGGAGTGACACTGGACATA	21	23	NM_032783	-	2134	2154	1	21	19	15G1C3	2	carbonyl reductase 4 (CBR4), mRNA
7079	AACCACAGTTCCTCTCTTTTCT	22	23	NM_144684	+	545	566	1	22	20	15C3T2	2	zinc finger protein 480 (ZNF480), mRNA
7172	AAAACCCATCTTTCCTTTCTG	21	22	NM_001177876	+	1612	1632	1	21	19	5C10T4	2	proprotein convertase subtilisin/kexin type 1 (PCSK1), transcript variant 3, mRNA
7172	AAAACCCATCTTTCCTTTCTG	21	22	NM_001177875	+	2366	2386	1	21	19	5C10T4	2	proprotein convertase subtilisin/kexin type 1 (PCSK1), transcript variant 2, mRNA
7172	AAAACCCATCTTTCCTTTCTG	21	22	NM_000439	+	2708	2728	1	21	19	5C10T4	2	proprotein convertase subtilisin/kexin type 1 (PCSK1), transcript variant 1, mRNA
7181	CCTCAACACTTGGATGCTTGTT	22	22	NR_034022	+	19583	19604	1	22	20	2T14T4	2	zinc finger protein 655 pseudogene (LOC100131257), non-coding RNA
7439	TTTCTTTCCTTGAGTTGTGACT	22	21	NM_003895	-	2198	2219	1	22	20	8C4G8	2	synaptojanin 1 (SYNJ1), transcript variant 1, mRNA
7439	TTTCTTTCCTTGAGTTGTGACT	22	21	NM_203446	-	2198	2219	1	22	20	8C4G8	2	synaptojanin 1 (SYNJ1), transcript variant 2, mRNA
7439	TTTCTTTCCTTGAGTTGTGACT	22	21	NM_001160302	-	2206	2227	1	22	20	8C4G8	2	synaptojanin 1 (SYNJ1), transcript variant 3, mRNA
7439	TTTCTTTCCTTGAGTTGTGACT	22	21	NM_001160306	-	2191	2212	1	22	20	8C4G8	2	synaptojanin 1 (SYNJ1), transcript variant 4, mRNA
7578	CATATTCTTCCTCATAAACATG	22	21	NM_001154	-	544	565	1	22	20	10C8A2	2	annexin A5 (ANXA5), mRNA
7667	CAAATCCTGGTTTGTGTCTCC	21	21	NM_016848	+	2937	2956	2	21	19	2A17	2	SHC (Src homology 2 domain containing) transforming protein 3 (SHC3), mRNA
7730	CAAAGGACTCAGAGATTATAG	21	21	NR_037859	-	2382	2402	1	21	19	15T2T2	2	PIR-FIGF readthrough (PIR-FIGF), non-coding RNA
7730	CAAAGGACTCAGAGATTATAG	21	21	NM_004469	-	1874	1894	1	21	19	15T2T2	2	c-fos induced growth factor (vascular endothelial growth factor D) (FIGF), mRNA
7881	GACCTTGAGACAAGCAAAGAAC	22	20	NM_002924	+	1273	1294	1	22	20	2C6A12	2	regulator of G-protein signaling 7 (RGS7), mRNA
8324	CTTCTAGAACACATATGGGCT	21	19	NM_021235	+	940	959	1	20	19	7A12	2	epidermal growth factor receptor pathway substrate 15-like 1 (EPS15L1), mRNA
8359	ACTTGGTTATTGGGACATCTG	21	19	NM_012307	-	3839	3858	1	20	19	13G6	2	erythrocyte membrane protein band 4.1-like 3 (EPB41L3), mRNA
8490	CAAAATCGTCCCTTAGGAGAGC	22	19	NM_024086	-	321	341	1	21	20	7G13	2	methyltransferase like 16 (METTL16), mRNA
8513	GTTTCCTTGTGACCATCTGAAG	22	19	NM_014554	-	1038	1059	1	22	20	6T12A2	2	SUMO1/sentrin specific peptidase 1 (SENP1), mRNA
8548	CTGTGGTCTTCGAGCACTAGT	21	19	NM_006943	+	3014	3034	1	21	19	10C3C6	2	SRY (sex determining region Y)-box 12 (SOX12), mRNA
8646	ATCTGTTTCCTCCTGTTTCCT	21	18	NR_033373	+	2274	2294	1	21	19	9C4G6	2	uncharacterized FLJ39534 (FLJ39534), non-coding RNA
8715	CATCAAGGATCTTAGTTGGGA	21	18	NM_007145	+	979	999	1	21	19	8AT11	2	zinc finger protein 146 (ZNF146), transcript variant 1, mRNA
8715	CATCAAGGATCTTAGTTGGGA	21	18	NM_001099638	+	905	925	1	21	19	8AT11	2	zinc finger protein 146 (ZNF146), transcript variant 2, mRNA
8715	CATCAAGGATCTTAGTTGGGA	21	18	NM_001099639	+	864	884	1	21	19	8AT11	2	zinc finger protein 146 (ZNF146), transcript variant 3, mRNA
8797	TCCTTCTAGAACACATATGGGC	22	18	NM_021235	+	939	959	2	22	20	8A12	2	epidermal growth factor receptor pathway substrate 15-like 1 (EPS15L1), mRNA
8853	AGCTGCTGTTTCTCGTGAAAAC	22	18	NM_001035	-	9681	9702	1	22	20	7G11A2	2	ryanodine receptor 2 (cardiac) (RYR2), mRNA
8863	TATTGCTTCTCTTGCCCTATT	21	18	NM_207333	+	4830	4849	2	21	19	8T11	2	zinc finger protein 320 (ZNF320), mRNA
9143	TCTTCATCAATGTTCTGGATCT	22	18	NM_004924	-	328	349	1	22	20	2T13G5	2	actinin, alpha 4 (ACTN4), mRNA
9319	CTTTGCTTTGATTGGTGGTGGT	22	17	NM_006918	-	6581	6602	1	22	20	4G10T6	2	sterol-C5-desaturase (ERG3 delta-5-desaturase homolog, S. cerevisiae)-like (SC5DL	), transcript variant 1, mRNA
9319	CTTTGCTTTGATTGGTGGTGGT	22	17	NM_001024956	-	6654	6675	1	22	20	4G10T6	2	sterol-C5-desaturase (ERG3 delta-5-desaturase homolog, S. cerevisiae)-like (SC5DL	), transcript variant 2, mRNA
9440	AACATTGTTTCCTTGTGACCA	21	17	NM_020718	-	8675	8694	2	21	19	5G14	2	ubiquitin specific peptidase 31 (USP31), mRNA
9478	CCTCCTTCTGTTGTGCCACTGT	22	17	NM_001025077	+	1837	1858	1	22	20	6T1T13	2	CUGBP, Elav-like family member 2 (CELF2), transcript variant 3, mRNA
9561	CTGTCCACTGTTGTTCCCTCT	21	17	NM_025138	+	3169	3188	1	20	19	10T9	2	proline and serine rich 1 (PROSER1), transcript variant 1, mRNA
9561	CTGTCCACTGTTGTTCCCTCT	21	17	NM_170719	+	3103	3122	1	20	19	10T9	2	proline and serine rich 1 (PROSER1), transcript variant 2, mRNA
9684	TATAATCTCTGAGTCCTTTGTA	22	17	NM_152663	-	885	906	1	22	20	4A10C6	2	Ral GEF with PH domain and SH3 binding motif 2 (RALGPS2), mRNA
9943	TTTGCTTTGATTGGTGGTGGT	21	16	NM_001193451	+	7218	7237	1	20	19	12G7	2	transmembrane and tetratricopeptide repeat containing 1 (TMTC1), transcript varia	nt 1, mRNA
9943	TTTGCTTTGATTGGTGGTGGT	21	16	NM_175861	+	7309	7328	1	20	19	12G7	2	transmembrane and tetratricopeptide repeat containing 1 (TMTC1), transcript varia	nt 2, mRNA
9951	TCTGATTTACGTCCCTTGCAG	21	16	NM_001256486	+	10445	10465	1	21	19	9C3C7	2	golgin B1 (GOLGB1), transcript variant 1, mRNA
9951	TCTGATTTACGTCCCTTGCAG	21	16	NM_004487	+	10415	10435	1	21	19	9C3C7	2	golgin B1 (GOLGB1), transcript variant 2, mRNA
9951	TCTGATTTACGTCCCTTGCAG	21	16	NM_001256487	+	10458	10478	1	21	19	9C3C7	2	golgin B1 (GOLGB1), transcript variant 3, mRNA
9951	TCTGATTTACGTCCCTTGCAG	21	16	NM_001256488	+	10335	10355	1	21	19	9C3C7	2	golgin B1 (GOLGB1), transcript variant 4, mRNA
10068	TATGAGACACTTTGAGAAGGG	21	16	NM_032279	+	109	128	2	21	19	3A16	2	ATPase type 13A4 (ATP13A4), mRNA
10459	TCTGGAAAACCTGAAATGGCA	21	15	NM_144631	+	1415	1435	1	21	19	6A9T4	2	zinc finger protein 513 (ZNF513), transcript variant 1, mRNA
10459	TCTGGAAAACCTGAAATGGCA	21	15	NM_001201459	+	1338	1358	1	21	19	6A9T4	2	zinc finger protein 513 (ZNF513), transcript variant 2, mRNA
10502	CATCAAGGATCTTAGTTGGGAG	22	15	NM_007145	+	979	1000	1	22	20	8AT12	2	zinc finger protein 146 (ZNF146), transcript variant 1, mRNA
10502	CATCAAGGATCTTAGTTGGGAG	22	15	NM_001099638	+	905	926	1	22	20	8AT12	2	zinc finger protein 146 (ZNF146), transcript variant 2, mRNA
10502	CATCAAGGATCTTAGTTGGGAG	22	15	NM_001099639	+	864	885	1	22	20	8AT12	2	zinc finger protein 146 (ZNF146), transcript variant 3, mRNA
10553	GGTGAAAAAGGGTGTCAACTC	21	15	NM_003938	+	3580	3600	1	21	19	14TC5	2	adaptor-related protein complex 3, delta 1 subunit (AP3D1), transcript variant 2,	mRNA
10553	GGTGAAAAAGGGTGTCAACTC	21	15	NM_001077523	+	3457	3477	1	21	19	14TC5	2	adaptor-related protein complex 3, delta 1 subunit (AP3D1), transcript variant 1,	mRNA
10556	TACAAAGGACTCAGAGATTATA	22	15	NM_152663	+	885	906	1	22	20	6G10T4	2	Ral GEF with PH domain and SH3 binding motif 2 (RALGPS2), mRNA
10636	CTTGTGTCTGATCTCTTTGGT	21	15	NM_001010872	-	2564	2583	2	21	19	11C8	2	family with sequence similarity 83, member B (FAM83B), mRNA
10848	ACAGACTTGCTCTCAACCTCC	21	15	NM_152620	-	875	895	1	21	19	10T3A6	2	tripartite motif containing 60 (TRIM60), mRNA
10926	AGGGAGTGATAACAATGATGGT	22	15	NM_002742	+	1210	1231	1	22	20	10A8G2	2	protein kinase D1 (PRKD1), mRNA
10952	CTATGGAAGGGAATTTGGTGG	21	15	NM_001077498	+	1988	2008	1	21	19	3T1G15	2	chromosome 17 open reading frame 63 (C17orf63), transcript variant 1, mRNA
10952	CTATGGAAGGGAATTTGGTGG	21	15	NM_018182	+	2022	2042	1	21	19	3T1G15	2	chromosome 17 open reading frame 63 (C17orf63), transcript variant 2, mRNA
11007	TTGCCTGCACTTTTTCAATTGG	22	15	NM_024430	+	1766	1787	1	22	20	5T11A4	2	proline-serine-threonine phosphatase interacting protein 2 (PSTPIP2), mRNA
11422	CTACCTCCTTCTGTTGTGCCA	21	14	NM_022977	-	2382	2402	1	21	19	5T1C13	2	acyl-CoA synthetase long-chain family member 4 (ACSL4), transcript variant 2, mRN	A
11422	CTACCTCCTTCTGTTGTGCCA	21	14	NM_004458	-	2070	2090	1	21	19	5T1C13	2	acyl-CoA synthetase long-chain family member 4 (ACSL4), transcript variant 1, mRN	A
11552	CTGACCAGCCTTGTTTACAGC	21	14	NM_145239	+	1444	1464	1	21	19	4C1A14	2	proline-rich transmembrane protein 2 (PRRT2), transcript variant 1, mRNA
11552	CTGACCAGCCTTGTTTACAGC	21	14	NM_001256442	+	1606	1626	1	21	19	4C1A14	2	proline-rich transmembrane protein 2 (PRRT2), transcript variant 2, mRNA
11552	CTGACCAGCCTTGTTTACAGC	21	14	NM_001256443	+	2033	2053	1	21	19	4C1A14	2	proline-rich transmembrane protein 2 (PRRT2), transcript variant 3, mRNA
11801	TAGCACTGTTACAGAAAAGAGA	22	14	NM_001206696	-	1547	1568	1	22	20	2G8C10	2	interferon regulatory factor 6 (IRF6), transcript variant 2, mRNA
11801	TAGCACTGTTACAGAAAAGAGA	22	14	NM_006147	-	1796	1817	1	22	20	2G8C10	2	interferon regulatory factor 6 (IRF6), transcript variant 1, mRNA
11960	CTGGCTGTTGGATGCTTTTCT	21	14	NM_016282	+	480	499	1	20	19	14C5	2	adenylate kinase 3 (AK3), nuclear gene encoding mitochondrial protein, transcript	variant 1, mRNA
11960	CTGGCTGTTGGATGCTTTTCT	21	14	NM_001199853	+	179	198	1	20	19	14C5	2	adenylate kinase 3 (AK3), transcript variant 3, mRNA
11960	CTGGCTGTTGGATGCTTTTCT	21	14	NM_001199855	+	186	205	1	20	19	14C5	2	adenylate kinase 3 (AK3), transcript variant 5, mRNA
11960	CTGGCTGTTGGATGCTTTTCT	21	14	NM_001199856	+	252	271	1	20	19	14C5	2	adenylate kinase 3 (AK3), transcript variant 6, mRNA
12037	TCTGAGTCCTTTGTACACAGA	21	13	NM_018339	-	2232	2252	1	21	19	7C4G8	2	riboflavin kinase (RFK), mRNA
12097	TCTTGATTCGCATGCCAAAGG	21	13	NM_014864	+	1788	1808	1	21	19	4G4G11	2	family with sequence similarity 20, member B (FAM20B), mRNA
12205	ACAGAAGGAGGTAGTAGTCAC	21	13	NM_024736	+	647	667	1	21	19	12A1T6	2	gasdermin D (GSDMD), transcript variant 1, mRNA
12205	ACAGAAGGAGGTAGTAGTCAC	21	13	NM_001166237	+	1201	1221	1	21	19	12A1T6	2	gasdermin D (GSDMD), transcript variant 2, mRNA
12296	ATGAGACACTTTGAGAAGGGA	21	13	NM_032279	+	109	128	1	20	19	3A16	2	ATPase type 13A4 (ATP13A4), mRNA
12334	AGAGGACATTGAAAGGAGACT	21	13	NM_144985	-	1800	1819	1	20	19	7A12	2	cadherin 24, type 2 (CDH24), transcript variant 2, mRNA
12334	AGAGGACATTGAAAGGAGACT	21	13	NM_022478	-	1914	1933	1	20	19	7A12	2	cadherin 24, type 2 (CDH24), transcript variant 1, mRNA
12339	GAACTTCCTCAATTCCTTTCTC	22	13	NM_214711	+	3398	3419	1	22	20	14C4C2	2	chromosome 4 open reading frame 40 (C4orf40), mRNA
12387	TTGAAAGGAGACTGGTGTTCT	21	13	NM_006157	+	2098	2118	1	21	19	7G4T8	2	NEL-like 1 (chicken) (NELL1), transcript variant 1, mRNA
12387	TTGAAAGGAGACTGGTGTTCT	21	13	NM_201551	+	1957	1977	1	21	19	7G4T8	2	NEL-like 1 (chicken) (NELL1), transcript variant 2, mRNA
12455	TATGTTTGCATATTGGAGCTC	21	13	NM_020782	+	3802	3822	1	21	19	14GG5	2	kelch domain containing 5 (KLHDC5), mRNA
12556	CCAGCAGCTGTGCTTTTGCCT	21	13	NM_152426	+	1643	1662	2	21	19	2G17	2	apolipoprotein B mRNA editing enzyme, catalytic polypeptide-like 3D (APOBEC3D), m	RNA
12556	CCAGCAGCTGTGCTTTTGCCT	21	13	NM_002697	-	518	538	1	21	19	13T1T5	2	POU class 2 homeobox 1 (POU2F1), transcript variant 1, mRNA
12556	CCAGCAGCTGTGCTTTTGCCT	21	13	NM_001198783	-	651	671	1	21	19	13T1T5	2	POU class 2 homeobox 1 (POU2F1), transcript variant 2, mRNA
13352	ATTTCCATTCTTGTCCAACTG	21	12	NM_032606	-	1563	1583	1	21	19	6A1T12	2	calcyphosine 2 (CAPS2), mRNA
13582	CTCCGGAACTTCCTCAATTCC	21	12	NM_003194	-	166	186	1	21	19	3C1G15	2	TATA box binding protein (TBP), transcript variant 1, mRNA
13591	ATTCTTCTCTGAATCATTGGA	21	12	NR_038402	+	317	336	2	21	19	17G2	2	uncharacterized LOC100507387 (LOC100507387), non-coding RNA
13741	CTCCTTCTGTTGTGCCACTGT	21	12	NM_001025077	+	1838	1858	1	21	19	5T1T13	2	CUGBP, Elav-like family member 2 (CELF2), transcript variant 3, mRNA
13742	TGGGCAAGCTGACAGCGCACT	21	12	NM_198458	-	1840	1860	1	21	19	5A3T11	2	zinc finger protein 497 (ZNF497), mRNA
13742	TGGGCAAGCTGACAGCGCACT	21	12	NM_001207009	-	1743	1763	1	21	19	5A3T11	2	zinc finger protein 497 (ZNF497), transcript variant 2, mRNA
13856	CATGGCATTGCAAGGCAAAAG	21	12	NM_020188	+	383	403	1	21	19	13G2A4	2	chromosome 16 open reading frame 61 (C16orf61), mRNA
14071	ATTGTGCAATGTGAGATATTG	21	11	NM_016507	+	7725	7745	1	21	19	5G5T9	2	cyclin-dependent kinase 12 (CDK12), transcript variant 1, mRNA
14071	ATTGTGCAATGTGAGATATTG	21	11	NM_015083	+	7698	7718	1	21	19	5G5T9	2	cyclin-dependent kinase 12 (CDK12), transcript variant 2, mRNA
14099	CCTCCTGTTTCCTTTTGCGCTC	22	11	NM_003258	+	1388	1409	1	22	20	4C12C4	2	thymidine kinase 1, soluble (TK1), mRNA
14362	CTTGGAGCCAAAGTTTGCGTT	21	11	NM_004675	-	302	322	1	21	19	13T1T5	2	DIRAS family, GTP-binding RAS-like 3 (DIRAS3), mRNA
14384	TACACCCTCTGTGGATCTAGC	21	11	NM_007314	+	2877	2896	2	21	19	10T9	2	v-abl Abelson murine leukemia viral oncogene homolog 2 (ABL2), transcript variant	b, mRNA
14384	TACACCCTCTGTGGATCTAGC	21	11	NM_005158	+	2590	2609	2	21	19	10T9	2	v-abl Abelson murine leukemia viral oncogene homolog 2 (ABL2), transcript variant	c, mRNA
14384	TACACCCTCTGTGGATCTAGC	21	11	NM_001136000	+	2281	2300	2	21	19	10T9	2	v-abl Abelson murine leukemia viral oncogene homolog 2 (ABL2), transcript variant	d, mRNA
14384	TACACCCTCTGTGGATCTAGC	21	11	NM_001168236	+	2814	2833	2	21	19	10T9	2	v-abl Abelson murine leukemia viral oncogene homolog 2 (ABL2), transcript variant	f, mRNA
14384	TACACCCTCTGTGGATCTAGC	21	11	NM_001168237	+	2568	2587	2	21	19	10T9	2	v-abl Abelson murine leukemia viral oncogene homolog 2 (ABL2), transcript variant	g, mRNA
14384	TACACCCTCTGTGGATCTAGC	21	11	NM_001168238	+	2505	2524	2	21	19	10T9	2	v-abl Abelson murine leukemia viral oncogene homolog 2 (ABL2), transcript variant	h, mRNA
14384	TACACCCTCTGTGGATCTAGC	21	11	NM_001168239	+	2218	2237	2	21	19	10T9	2	v-abl Abelson murine leukemia viral oncogene homolog 2 (ABL2), transcript variant	i, mRNA
14458	GACAATGTTTGATGTGGCTAC	21	11	NM_001004297	-	1595	1614	1	20	19	2C17	2	olfactory receptor, family 13, subfamily A, member 1 (OR13A1), mRNA
14484	TCTTTGCTTTGATTGGTGGTG	21	11	NM_006918	-	6583	6603	1	21	19	5G10T4	2	sterol-C5-desaturase (ERG3 delta-5-desaturase homolog, S. cerevisiae)-like (SC5DL	), transcript variant 1, mRNA
14484	TCTTTGCTTTGATTGGTGGTG	21	11	NM_001024956	-	6656	6676	1	21	19	5G10T4	2	sterol-C5-desaturase (ERG3 delta-5-desaturase homolog, S. cerevisiae)-like (SC5DL	), transcript variant 2, mRNA
14840	AATGGAGTTTGGGTGATGATG	21	11	NM_001204265	+	3467	3486	2	21	19	5G14	2	nuclear receptor subfamily 3, group C, member 1 (glucocorticoid receptor) (NR3C1)	, transcript variant 8, mRNA
15454	CATGAACTTCTTTCCATCCCA	21	10	NR_033393	-	387	406	1	20	19	16T3	2	TROVE domain family, member 2 (TROVE2), non-coding RNA
15454	CATGAACTTCTTTCCATCCCA	21	10	NM_001042369	-	982	1001	1	20	19	16T3	2	TROVE domain family, member 2 (TROVE2), transcript variant 1, mRNA
15454	CATGAACTTCTTTCCATCCCA	21	10	NM_001173524	-	988	1007	1	20	19	16T3	2	TROVE domain family, member 2 (TROVE2), transcript variant 5, mRNA
15454	CATGAACTTCTTTCCATCCCA	21	10	NM_004600	-	982	1001	1	20	19	16T3	2	TROVE domain family, member 2 (TROVE2), transcript variant 2, mRNA
15454	CATGAACTTCTTTCCATCCCA	21	10	NM_001042370	-	982	1001	1	20	19	16T3	2	TROVE domain family, member 2 (TROVE2), transcript variant 3, mRNA
15454	CATGAACTTCTTTCCATCCCA	21	10	NM_001173525	-	982	1001	1	20	19	16T3	2	TROVE domain family, member 2 (TROVE2), transcript variant 4, mRNA
15487	TCCACTCTTGTGCTTTCATCC	21	10	NM_181078	-	3880	3900	1	21	19	14TT5	2	interleukin 21 receptor (IL21R), transcript variant 2, mRNA
15487	TCCACTCTTGTGCTTTCATCC	21	10	NM_021798	-	3527	3547	1	21	19	14TT5	2	interleukin 21 receptor (IL21R), transcript variant 1, mRNA
15487	TCCACTCTTGTGCTTTCATCC	21	10	NM_181079	-	4021	4041	1	21	19	14TT5	2	interleukin 21 receptor (IL21R), transcript variant 3, mRNA
15734	CGCTCGTCATTTTGGATCATT	21	10	NM_001004316	-	2189	2208	2	21	19	4G15	2	leucine, glutamate and lysine rich 1 (LEKR1), transcript variant 1, mRNA
15807	CATCAGGATCAGTTACAAATA	21	10	NM_024582	-	8681	8701	1	21	19	10A3A6	2	FAT tumor suppressor homolog 4 (Drosophila) (FAT4), mRNA
15972	GCATAGTTCTACCATCAACCT	21	10	NM_003319	-	4523	4543	1	21	19	6T7T6	2	titin (TTN), transcript variant N2-B, mRNA
15972	GCATAGTTCTACCATCAACCT	21	10	NM_133378	-	4661	4681	1	21	19	6T7T6	2	titin (TTN), transcript variant N2-A, mRNA
15972	GCATAGTTCTACCATCAACCT	21	10	NM_133379	-	4661	4681	1	21	19	6T7T6	2	titin (TTN), transcript variant novex-3, mRNA
15972	GCATAGTTCTACCATCAACCT	21	10	NM_133432	-	4523	4543	1	21	19	6T7T6	2	titin (TTN), transcript variant novex-1, mRNA
15972	GCATAGTTCTACCATCAACCT	21	10	NM_133437	-	4523	4543	1	21	19	6T7T6	2	titin (TTN), transcript variant novex-2, mRNA
15975	ACACCCTCTGTGGATCTAGCT	21	10	NM_007314	+	2877	2896	1	20	19	10T9	2	v-abl Abelson murine leukemia viral oncogene homolog 2 (ABL2), transcript variant	b, mRNA
15975	ACACCCTCTGTGGATCTAGCT	21	10	NM_005158	+	2590	2609	1	20	19	10T9	2	v-abl Abelson murine leukemia viral oncogene homolog 2 (ABL2), transcript variant	c, mRNA
15975	ACACCCTCTGTGGATCTAGCT	21	10	NM_001136000	+	2281	2300	1	20	19	10T9	2	v-abl Abelson murine leukemia viral oncogene homolog 2 (ABL2), transcript variant	d, mRNA
15975	ACACCCTCTGTGGATCTAGCT	21	10	NM_001168236	+	2814	2833	1	20	19	10T9	2	v-abl Abelson murine leukemia viral oncogene homolog 2 (ABL2), transcript variant	f, mRNA
15975	ACACCCTCTGTGGATCTAGCT	21	10	NM_001168237	+	2568	2587	1	20	19	10T9	2	v-abl Abelson murine leukemia viral oncogene homolog 2 (ABL2), transcript variant	g, mRNA
15975	ACACCCTCTGTGGATCTAGCT	21	10	NM_001168238	+	2505	2524	1	20	19	10T9	2	v-abl Abelson murine leukemia viral oncogene homolog 2 (ABL2), transcript variant	h, mRNA
15975	ACACCCTCTGTGGATCTAGCT	21	10	NM_001168239	+	2218	2237	1	20	19	10T9	2	v-abl Abelson murine leukemia viral oncogene homolog 2 (ABL2), transcript variant	i, mRNA
16168	GAAAAGACAGATACAAAAGCTG	22	10	NM_001008388	+	1967	1987	1	21	20	9G11	2	CDGSH iron sulfur domain 2 (CISD2), mRNA
16511	TCAGAAGAGGACATTGAAAGG	21	10	NM_203395	+	5335	5355	1	21	19	6G6T7	2	iodotyrosine deiodinase (IYD), transcript variant 2, mRNA
16511	TCAGAAGAGGACATTGAAAGG	21	10	NM_001164694	+	5447	5467	1	21	19	6G6T7	2	iodotyrosine deiodinase (IYD), transcript variant 1, mRNA
16511	TCAGAAGAGGACATTGAAAGG	21	10	NM_001164695	+	5396	5416	1	21	19	6G6T7	2	iodotyrosine deiodinase (IYD), transcript variant 3, mRNA
16513	CCTGAACATGAAAGCTGCTGTT	22	10	NM_002332	-	872	893	1	22	20	6CA14	2	low density lipoprotein receptor-related protein 1 (LRP1), mRNA
16713	CCTGAACATGAAAGCTGCTGT	21	10	NM_002332	-	873	893	1	21	19	6CA13	2	low density lipoprotein receptor-related protein 1 (LRP1), mRNA
17143	CTCCACCTCATATTCTTCCTCA	22	9	NM_001142769	-	4889	4909	2	22	20	3A17	2	protocadherin-related 15 (PCDH15), transcript variant I, mRNA
17143	CTCCACCTCATATTCTTCCTCA	22	9	NM_001142771	-	4868	4888	2	22	20	3A17	2	protocadherin-related 15 (PCDH15), transcript variant K, mRNA
17143	CTCCACCTCATATTCTTCCTCA	22	9	NM_001142770	-	4924	4944	2	22	20	3A17	2	protocadherin-related 15 (PCDH15), transcript variant J, mRNA
17143	CTCCACCTCATATTCTTCCTCA	22	9	NM_001142772	-	4853	4873	2	22	20	3A17	2	protocadherin-related 15 (PCDH15), transcript variant L, mRNA
17264	AGAGCCAATTGTATCGAAATG	21	9	NM_022068	-	245	265	1	21	19	6A9A4	2	piezo-type mechanosensitive ion channel component 2 (PIEZO2), mRNA
17500	GAGGATGAGCAAGCTGTGGTG	21	9	NM_001112808	+	2162	2182	1	21	19	7A3A9	2	FPGT-TNNI3K readthrough (FPGT-TNNI3K), transcript variant 1, mRNA
17500	GAGGATGAGCAAGCTGTGGTG	21	9	NM_001199327	+	2162	2182	1	21	19	7A3A9	2	FPGT-TNNI3K readthrough (FPGT-TNNI3K), transcript variant 2, mRNA
17500	GAGGATGAGCAAGCTGTGGTG	21	9	NM_015978	+	1857	1877	1	21	19	7A3A9	2	TNNI3 interacting kinase (TNNI3K), mRNA
17527	AGGGACGTAAATCAGAATATG	21	9	NM_138786	+	1130	1150	1	21	19	5C6C8	2	transmembrane 4 L six family member 18 (TM4SF18), transcript variant 1, mRNA
17527	AGGGACGTAAATCAGAATATG	21	9	NM_001184723	+	954	974	1	21	19	5C6C8	2	transmembrane 4 L six family member 18 (TM4SF18), transcript variant 2, mRNA
17920	ACCATCATTGTTATCACTCCCT	22	9	NM_002742	-	1210	1231	1	22	20	2C8T10	2	protein kinase D1 (PRKD1), mRNA
18085	TATTGCTTCTCTTGCCCTATTT	22	9	NM_207333	+	4830	4850	2	22	20	8T12	2	zinc finger protein 320 (ZNF320), mRNA
18254	ATGATTGAAATCCAGAACTTC	21	9	NM_024953	+	3060	3080	1	21	19	6GA13	2	N(alpha)-acetyltransferase 25, NatB auxiliary subunit (NAA25), mRNA
18276	TCTTTCCTTTCTGCTCTGCAC	21	9	NM_187841	-	105	125	1	21	19	3T1C15	2	tripartite motif containing 54 (TRIM54), transcript variant 2, mRNA
18276	TCTTTCCTTTCTGCTCTGCAC	21	9	NM_032546	-	105	125	1	21	19	3T1C15	2	tripartite motif containing 54 (TRIM54), transcript variant 1, mRNA
18945	AAGAACCAACAAAGGCTGGCA	21	8	NM_001256053	+	1251	1271	1	21	19	14G1T4	2	ankyrin repeat domain 26 (ANKRD26), transcript variant 2, mRNA
18945	AAGAACCAACAAAGGCTGGCA	21	8	NM_014915	+	1251	1271	1	21	19	14G1T4	2	ankyrin repeat domain 26 (ANKRD26), transcript variant 1, mRNA
19119	AAGGAACTCGCTGCATCCGGA	21	8	NM_001136019	-	172	192	1	21	19	10C3A6	2	Fc fragment of IgG, receptor, transporter, alpha (FCGRT), transcript variant 1, m	RNA
19244	TACCTCGCACAACAAAGTATG	21	8	NM_001145205	+	2807	2826	1	20	19	5C14	2	shisa homolog 9 (Xenopus laevis) (SHISA9), transcript variant 2, mRNA
19591	ATCACCATCCATTTTAATCCAC	22	8	NR_038120	-	2145	2166	1	22	20	5C10A5	2	engulfment and cell motility 1 (ELMO1), transcript variant 6, non-coding RNA
19591	ATCACCATCCATTTTAATCCAC	22	8	NR_038121	-	2258	2279	1	22	20	5C10A5	2	engulfment and cell motility 1 (ELMO1), transcript variant 2, non-coding RNA
19591	ATCACCATCCATTTTAATCCAC	22	8	NM_014800	-	3702	3723	1	22	20	5C10A5	2	engulfment and cell motility 1 (ELMO1), transcript variant 1, mRNA
19591	ATCACCATCCATTTTAATCCAC	22	8	NM_001206480	-	3857	3878	1	22	20	5C10A5	2	engulfment and cell motility 1 (ELMO1), transcript variant 4, mRNA
19591	ATCACCATCCATTTTAATCCAC	22	8	NM_001206482	-	4061	4082	1	22	20	5C10A5	2	engulfment and cell motility 1 (ELMO1), transcript variant 5, mRNA
19591	ATCACCATCCATTTTAATCCAC	22	8	NM_001039459	-	2112	2133	1	22	20	5C10A5	2	engulfment and cell motility 1 (ELMO1), transcript variant 3, mRNA
19981	CCATGATTCAAACTGTGTCTT	21	8	NM_001014342	-	7303	7322	2	21	19	7C12	2	filaggrin family member 2 (FLG2), mRNA
20064	TGCACTTTAACTTCCTCACCC	21	8	NM_005341	-	1924	1944	1	21	19	6TT13	2	zinc finger and BTB domain containing 48 (ZBTB48), mRNA
20162	TGTGGATTAAAATGGATGGTGA	22	8	NR_038120	+	2144	2165	1	22	20	6T10G4	2	engulfment and cell motility 1 (ELMO1), transcript variant 6, non-coding RNA
20162	TGTGGATTAAAATGGATGGTGA	22	8	NR_038121	+	2257	2278	1	22	20	6T10G4	2	engulfment and cell motility 1 (ELMO1), transcript variant 2, non-coding RNA
20162	TGTGGATTAAAATGGATGGTGA	22	8	NM_014800	+	3701	3722	1	22	20	6T10G4	2	engulfment and cell motility 1 (ELMO1), transcript variant 1, mRNA
20162	TGTGGATTAAAATGGATGGTGA	22	8	NM_001206480	+	3856	3877	1	22	20	6T10G4	2	engulfment and cell motility 1 (ELMO1), transcript variant 4, mRNA
20162	TGTGGATTAAAATGGATGGTGA	22	8	NM_001206482	+	4060	4081	1	22	20	6T10G4	2	engulfment and cell motility 1 (ELMO1), transcript variant 5, mRNA
20162	TGTGGATTAAAATGGATGGTGA	22	8	NM_001039459	+	2111	2132	1	22	20	6T10G4	2	engulfment and cell motility 1 (ELMO1), transcript variant 3, mRNA
20176	TTCTTTGCTGTGCTCACAATA	21	8	NM_005224	-	2343	2362	1	20	19	11G8	2	AT rich interactive domain 3A (BRIGHT-like) (ARID3A), mRNA
20214	GTTCATGAACTTCTTTCCATCC	22	8	NR_033393	-	388	408	2	22	20	18T2	2	TROVE domain family, member 2 (TROVE2), non-coding RNA
20214	GTTCATGAACTTCTTTCCATCC	22	8	NM_001042369	-	983	1003	2	22	20	18T2	2	TROVE domain family, member 2 (TROVE2), transcript variant 1, mRNA
20214	GTTCATGAACTTCTTTCCATCC	22	8	NM_001173524	-	989	1009	2	22	20	18T2	2	TROVE domain family, member 2 (TROVE2), transcript variant 5, mRNA
20214	GTTCATGAACTTCTTTCCATCC	22	8	NM_004600	-	983	1003	2	22	20	18T2	2	TROVE domain family, member 2 (TROVE2), transcript variant 2, mRNA
20214	GTTCATGAACTTCTTTCCATCC	22	8	NM_001042370	-	983	1003	2	22	20	18T2	2	TROVE domain family, member 2 (TROVE2), transcript variant 3, mRNA
20214	GTTCATGAACTTCTTTCCATCC	22	8	NM_001173525	-	983	1003	2	22	20	18T2	2	TROVE domain family, member 2 (TROVE2), transcript variant 4, mRNA
20527	AAAGACACAGTTTGAATCATG	21	8	NM_001014342	+	7303	7322	2	21	19	12G7	2	filaggrin family member 2 (FLG2), mRNA
20667	TCGATTGACTAATTGCTGCTG	21	8	NM_024581	-	3400	3420	1	21	19	14G1T4	2	family with sequence similarity 184, member A (FAM184A), transcript variant 1, mR	NA
20667	TCGATTGACTAATTGCTGCTG	21	8	NM_001100411	-	2862	2882	1	21	19	14G1T4	2	family with sequence similarity 184, member A (FAM184A), transcript variant 2, mR	NA
20808	CCATAAATCTCATCAGGATCAG	22	8	NM_000922	-	2731	2752	1	22	20	6A12C2	2	phosphodiesterase 3B, cGMP-inhibited (PDE3B), mRNA
20956	GCATAGTTCTACCATCAACCTT	22	8	NM_003319	-	4522	4543	1	22	20	6T7T7	2	titin (TTN), transcript variant N2-B, mRNA
20956	GCATAGTTCTACCATCAACCTT	22	8	NM_133378	-	4660	4681	1	22	20	6T7T7	2	titin (TTN), transcript variant N2-A, mRNA
20956	GCATAGTTCTACCATCAACCTT	22	8	NM_133379	-	4660	4681	1	22	20	6T7T7	2	titin (TTN), transcript variant novex-3, mRNA
20956	GCATAGTTCTACCATCAACCTT	22	8	NM_133432	-	4522	4543	1	22	20	6T7T7	2	titin (TTN), transcript variant novex-1, mRNA
20956	GCATAGTTCTACCATCAACCTT	22	8	NM_133437	-	4522	4543	1	22	20	6T7T7	2	titin (TTN), transcript variant novex-2, mRNA
21090	ATTGCTTCTCTTGCCCTATTTG	22	8	NM_207333	+	4830	4850	1	21	20	8T12	2	zinc finger protein 320 (ZNF320), mRNA
21250	ATGAGATGTGTGAGAAGATAGA	22	8	NM_178140	-	11395	11416	1	22	20	12A6A2	2	PDZ domain containing 2 (PDZD2), mRNA
21763	AAGATCCTTGATGTGTCGCCTG	22	7	NM_020937	-	5813	5834	1	22	20	2G14G4	2	Fanconi anemia, complementation group M (FANCM), mRNA
21942	CCACCACCAATCAAAGCAAAG	21	7	NM_001193451	-	7218	7237	1	20	19	7C12	2	transmembrane and tetratricopeptide repeat containing 1 (TMTC1), transcript varia	nt 1, mRNA
21942	CCACCACCAATCAAAGCAAAG	21	7	NM_175861	-	7309	7328	1	20	19	7C12	2	transmembrane and tetratricopeptide repeat containing 1 (TMTC1), transcript varia	nt 2, mRNA
21942	CCACCACCAATCAAAGCAAAG	21	7	NM_006918	+	6582	6602	1	21	19	5A10C4	2	sterol-C5-desaturase (ERG3 delta-5-desaturase homolog, S. cerevisiae)-like (SC5DL	), transcript variant 1, mRNA
21942	CCACCACCAATCAAAGCAAAG	21	7	NM_001024956	+	6655	6675	1	21	19	5A10C4	2	sterol-C5-desaturase (ERG3 delta-5-desaturase homolog, S. cerevisiae)-like (SC5DL	), transcript variant 2, mRNA
21954	TATGAATGTGCTGATTGTGGA	21	7	NM_003408	+	1157	1176	1	20	19	14T5	2	zinc finger protein 37 homolog (mouse) (ZFP37), mRNA
21954	TATGAATGTGCTGATTGTGGA	21	7	NM_152455	+	2179	2198	1	20	19	3G16	2	zinc finger and SCAN domain containing 29 (ZSCAN29), mRNA
21954	TATGAATGTGCTGATTGTGGA	21	7	NM_006958	+	1734	1754	1	21	19	9G4T6	2	zinc finger protein 16 (ZNF16), transcript variant 1, mRNA
21954	TATGAATGTGCTGATTGTGGA	21	7	NM_001172638	+	572	592	1	21	19	10C3T6	2	zinc finger protein 62 homolog (mouse) (ZFP62), transcript variant 2, mRNA
22287	TCACCATCCATTTTAATCCACA	22	7	NR_038120	-	2144	2165	1	22	20	4C10A6	2	engulfment and cell motility 1 (ELMO1), transcript variant 6, non-coding RNA
22287	TCACCATCCATTTTAATCCACA	22	7	NR_038121	-	2257	2278	1	22	20	4C10A6	2	engulfment and cell motility 1 (ELMO1), transcript variant 2, non-coding RNA
22287	TCACCATCCATTTTAATCCACA	22	7	NM_014800	-	3701	3722	1	22	20	4C10A6	2	engulfment and cell motility 1 (ELMO1), transcript variant 1, mRNA
22287	TCACCATCCATTTTAATCCACA	22	7	NM_001206480	-	3856	3877	1	22	20	4C10A6	2	engulfment and cell motility 1 (ELMO1), transcript variant 4, mRNA
22287	TCACCATCCATTTTAATCCACA	22	7	NM_001206482	-	4060	4081	1	22	20	4C10A6	2	engulfment and cell motility 1 (ELMO1), transcript variant 5, mRNA
22287	TCACCATCCATTTTAATCCACA	22	7	NM_001039459	-	2111	2132	1	22	20	4C10A6	2	engulfment and cell motility 1 (ELMO1), transcript variant 3, mRNA
22365	CTTTGCTTTGATTGGTGGTGG	21	7	NM_001193451	+	7218	7237	2	21	19	12G7	2	transmembrane and tetratricopeptide repeat containing 1 (TMTC1), transcript varia	nt 1, mRNA
22365	CTTTGCTTTGATTGGTGGTGG	21	7	NM_175861	+	7309	7328	2	21	19	12G7	2	transmembrane and tetratricopeptide repeat containing 1 (TMTC1), transcript varia	nt 2, mRNA
22365	CTTTGCTTTGATTGGTGGTGG	21	7	NM_006918	-	6582	6602	1	21	19	4G10T5	2	sterol-C5-desaturase (ERG3 delta-5-desaturase homolog, S. cerevisiae)-like (SC5DL	), transcript variant 1, mRNA
22365	CTTTGCTTTGATTGGTGGTGG	21	7	NM_001024956	-	6655	6675	1	21	19	4G10T5	2	sterol-C5-desaturase (ERG3 delta-5-desaturase homolog, S. cerevisiae)-like (SC5DL	), transcript variant 2, mRNA
22663	CTTCCTTTGGCTGTTCCTCTA	21	7	NM_022356	-	764	783	1	20	19	6T13	2	leucine proline-enriched proteoglycan (leprecan) 1 (LEPRE1), transcript variant 1	, mRNA
22663	CTTCCTTTGGCTGTTCCTCTA	21	7	NM_001146289	-	764	783	1	20	19	6T13	2	leucine proline-enriched proteoglycan (leprecan) 1 (LEPRE1), transcript variant 2	, mRNA
22663	CTTCCTTTGGCTGTTCCTCTA	21	7	NM_001243246	-	764	783	1	20	19	6T13	2	leucine proline-enriched proteoglycan (leprecan) 1 (LEPRE1), transcript variant 3	, mRNA
23480	AGCTTTTTGTCTTCATCAATG	21	7	NM_003400	+	4597	4617	1	21	19	10C3A6	2	exportin 1 (CRM1 homolog, yeast) (XPO1), mRNA
23550	CTTCTTTCCATCCCACTTTCCT	22	7	NM_203394	+	4299	4320	1	22	20	9A3C8	2	E2F transcription factor 7 (E2F7), mRNA
23741	CACTGTTTCTTTTTCTTTTCCT	22	7	NM_024778	-	1158	1179	1	22	20	2C6T12	2	LON peptidase N-terminal domain and ring finger 3 (LONRF3), transcript variant 2,	mRNA
23741	CACTGTTTCTTTTTCTTTTCCT	22	7	NM_001031855	-	1281	1302	1	22	20	2C6T12	2	LON peptidase N-terminal domain and ring finger 3 (LONRF3), transcript variant 1,	mRNA
23854	CAGGCGACACATCAAGGATCTT	22	7	NM_020937	+	5813	5834	1	22	20	4C14C2	2	Fanconi anemia, complementation group M (FANCM), mRNA
23907	AAATCCTGGTTTGTGTCTCCCC	22	7	NM_016848	+	2937	2957	1	21	20	2A18	2	SHC (Src homology 2 domain containing) transforming protein 3 (SHC3), mRNA
23986	AATTATGATCTGGCAATTAAAA	22	7	NM_198150	+	3268	3289	1	22	20	9C2G9	2	arylsulfatase family, member K (ARSK), mRNA
24121	TTGGTGACTACTACCTCCTTCT	22	7	NR_027471	+	411	432	1	22	20	6A5A9	2	uncharacterized LOC440173 (LOC440173), non-coding RNA
24205	TTGCTAAAAAGATGTTGAGAT	21	7	NM_001202855	+	1233	1252	2	21	19	3T16	2	cytochrome P450, family 3, subfamily A, polypeptide 4 (CYP3A4), transcript varian	t 2, mRNA
24205	TTGCTAAAAAGATGTTGAGAT	21	7	NM_017460	+	1236	1255	2	21	19	3T16	2	cytochrome P450, family 3, subfamily A, polypeptide 4 (CYP3A4), transcript varian	t 1, mRNA
24210	ATATGAATGTGCTGATTGTGGA	22	7	NM_152455	+	2178	2198	1	21	20	4G16	2	zinc finger and SCAN domain containing 29 (ZSCAN29), mRNA
24210	ATATGAATGTGCTGATTGTGGA	22	7	NM_001101338	+	1695	1716	1	22	20	10G4T6	2	zinc finger protein 883 (ZNF883), mRNA
24352	CTATGCTTCAGCTGCACAGCG	21	7	NM_001001561	+	842	862	1	21	19	2A15G2	2	golgi-associated, gamma adaptin ear containing, ARF binding protein 1 (GGA1), tra	nscript variant 3, mRNA
24360	TGAGGAAGAATATGAGGTGGAG	22	7	NM_001142769	+	4889	4909	1	21	20	17T3	2	protocadherin-related 15 (PCDH15), transcript variant I, mRNA
24360	TGAGGAAGAATATGAGGTGGAG	22	7	NM_001142771	+	4868	4888	1	21	20	17T3	2	protocadherin-related 15 (PCDH15), transcript variant K, mRNA
24360	TGAGGAAGAATATGAGGTGGAG	22	7	NM_001142770	+	4924	4944	1	21	20	17T3	2	protocadherin-related 15 (PCDH15), transcript variant J, mRNA
24360	TGAGGAAGAATATGAGGTGGAG	22	7	NM_001142772	+	4853	4873	1	21	20	17T3	2	protocadherin-related 15 (PCDH15), transcript variant L, mRNA
24489	TGTTTCCTTGTGACCATCTGA	21	7	NM_014554	-	1041	1060	1	20	19	7T12	2	SUMO1/sentrin specific peptidase 1 (SENP1), mRNA
24489	TGTTTCCTTGTGACCATCTGA	21	7	NM_213606	+	464	483	1	20	19	11G8	2	solute carrier family 16, member 12 (monocarboxylic acid transporter 12) (SLC16A1	2), mRNA
24943	CACTTGGTTATTGGGACATCT	21	7	NM_012307	-	3839	3858	2	21	19	13G6	2	erythrocyte membrane protein band 4.1-like 3 (EPB41L3), mRNA
24974	ACAACAAGGGAGTTAAAGAAC	21	7	NM_018976	-	1627	1647	1	21	19	8G6A5	2	solute carrier family 38, member 2 (SLC38A2), mRNA
25137	ATCCTTGATGTGTCGCCTGCA	21	6	NR_027002	-	8105	8124	2	21	19	6A13	2	uncharacterized LOC388692 (LOC388692), non-coding RNA
25146	CTTGGTGACTACTACCTCCTTC	22	6	NR_027471	+	410	431	1	22	20	7A5A8	2	uncharacterized LOC440173 (LOC440173), non-coding RNA
25359	TTGATGAAGACAAAAAGCTCA	21	6	NM_005347	+	1908	1927	2	21	19	3T16	2	heat shock 70kDa protein 5 (glucose-regulated protein, 78kDa) (HSPA5), mRNA
25380	TCCTTTTTGCTTTCCTTTCTT	21	6	NM_032831	-	9061	9081	1	21	19	8GC11	2	ORAI calcium release-activated calcium modulator 2 (ORAI2), transcript variant 2,	mRNA
25380	TCCTTTTTGCTTTCCTTTCTT	21	6	NR_002923	+	2956	2976	1	21	19	8G4C7	2	BCL6 corepressor pseudogene 1 (BCORP1), transcript variant 2, non-coding RNA
25380	TCCTTTTTGCTTTCCTTTCTT	21	6	NR_033732	+	3163	3183	1	21	19	8G4C7	2	BCL6 corepressor pseudogene 1 (BCORP1), transcript variant 1, non-coding RNA
25380	TCCTTTTTGCTTTCCTTTCTT	21	6	NR_036592	+	3055	3075	1	21	19	9C2T8	2	endogenous Bornavirus-like nucleoprotein 2 pseudogene (LOC100506710), non-coding	RNA
25503	TCCACTCTTGTGCTTTCATCCA	22	6	NM_181078	-	3879	3900	1	22	20	14TT6	2	interleukin 21 receptor (IL21R), transcript variant 2, mRNA
25503	TCCACTCTTGTGCTTTCATCCA	22	6	NM_021798	-	3526	3547	1	22	20	14TT6	2	interleukin 21 receptor (IL21R), transcript variant 1, mRNA
25503	TCCACTCTTGTGCTTTCATCCA	22	6	NM_181079	-	4020	4041	1	22	20	14TT6	2	interleukin 21 receptor (IL21R), transcript variant 3, mRNA
25911	CACTTTAACTTCCTCACCCAT	21	6	NM_022173	-	431	451	1	21	19	6A7C6	2	TIA1 cytotoxic granule-associated RNA binding protein (TIA1), transcript variant	2, mRNA
25911	CACTTTAACTTCCTCACCCAT	21	6	NM_022037	-	431	451	1	21	19	6A7C6	2	TIA1 cytotoxic granule-associated RNA binding protein (TIA1), transcript variant	1, mRNA
26045	CCACAGCATCCAACCACCACCA	22	6	NM_004994	+	1370	1391	1	22	20	4A2A14	2	matrix metallopeptidase 9 (gelatinase B, 92kDa gelatinase, 92kDa type IV collagen	ase) (MMP9), mRNA
26307	ATTAATTTCTTCACGTGCTCC	21	6	NM_005915	-	857	877	1	21	19	4A5T10	2	minichromosome maintenance complex component 6 (MCM6), mRNA
26474	AGATGTGTGAGAAGATAGAAAA	22	6	NR_037884	+	2279	2300	1	22	20	5T9T6	2	uncharacterized LOC100507053 (LOC100507053), non-coding RNA
26610	ATGTTTGCATATTGGAGCTCT	21	6	NM_020782	+	3803	3823	1	21	19	13GG6	2	kelch domain containing 5 (KLHDC5), mRNA
26698	TCCTTGATGTGTCGCCTGCAA	21	6	NR_027002	-	8105	8124	1	20	19	6A13	2	uncharacterized LOC388692 (LOC388692), non-coding RNA
26757	CTAGTTTCAGGATGAAAAACT	21	6	NM_007045	-	362	381	1	20	19	11A8	2	FGFR1 oncogene partner (FGFR1OP), transcript variant 1, mRNA
26757	CTAGTTTCAGGATGAAAAACT	21	6	NM_194429	-	362	381	1	20	19	11A8	2	FGFR1 oncogene partner (FGFR1OP), transcript variant 2, mRNA
27039	CTTGAGACAAGCAAAGAACCT	21	6	NM_002924	+	1276	1295	1	20	19	6A13	2	regulator of G-protein signaling 7 (RGS7), mRNA
27098	CAGTTGGACAAGAATGGAAAT	21	6	NM_032606	+	1563	1583	1	21	19	12A1T6	2	calcyphosine 2 (CAPS2), mRNA
27134	TGAGAGGCTTTTCAATGGAGA	21	6	NM_001004303	+	1355	1374	2	21	19	16G3	2	chromosome 1 open reading frame 168 (C1orf168), mRNA
27841	GAGGAAGAATATGAGGTGGAGG	22	6	NM_138923	+	5533	5554	1	22	20	9T6T5	2	TAF1 RNA polymerase II, TATA box binding protein (TBP)-associated factor, 250kDa	(TAF1), transcript variant 2, mRNA
27841	GAGGAAGAATATGAGGTGGAGG	22	6	NM_182498	+	565	586	1	22	20	9T6T5	2	zinc finger protein 428 (ZNF428), mRNA
27841	GAGGAAGAATATGAGGTGGAGG	22	6	NM_004606	+	5596	5617	1	22	20	9T6T5	2	TAF1 RNA polymerase II, TATA box binding protein (TBP)-associated factor, 250kDa	(TAF1), transcript variant 1, mRNA
27841	GAGGAAGAATATGAGGTGGAGG	22	6	NM_015241	+	3345	3366	1	22	20	14G1T5	2	microtubule associated monoxygenase, calponin and LIM domain containing 3 (MICAL3	), transcript variant 1, mRNA
27858	CTGAACATGAAAGCTGCTGTT	21	6	NM_002332	-	872	892	1	21	19	5CA14	2	low density lipoprotein receptor-related protein 1 (LRP1), mRNA
27966	AGGTTGTGGCAGTTTTGGACA	21	6	NM_182482	+	1827	1847	1	21	19	2G15A2	2	B melanoma antigen family, member 2 (BAGE2), mRNA
27966	AGGTTGTGGCAGTTTTGGACA	21	6	NM_182484	+	1776	1796	1	21	19	2G15A2	2	B melanoma antigen family, member 5 (BAGE5), mRNA
27966	AGGTTGTGGCAGTTTTGGACA	21	6	NM_181704	+	1776	1796	1	21	19	2G15A2	2	B melanoma antigen family, member 4 (BAGE4), mRNA
27966	AGGTTGTGGCAGTTTTGGACA	21	6	NM_182481	+	1827	1847	1	21	19	2G15A2	2	B melanoma antigen family, member 3 (BAGE3), mRNA
27966	AGGTTGTGGCAGTTTTGGACA	21	6	NM_170606	+	3102	3122	1	21	19	2G15A2	2	myeloid/lymphoid or mixed-lineage leukemia 3 (MLL3), mRNA
28490	TATGTATATAGAGAGAAAAGCA	22	6	NM_134260	-	9173	9194	1	22	20	7A2G11	2	RAR-related orphan receptor A (RORA), transcript variant 2, mRNA
28490	TATGTATATAGAGAGAAAAGCA	22	6	NM_134261	-	9003	9024	1	22	20	7A2G11	2	RAR-related orphan receptor A (RORA), transcript variant 1, mRNA
28490	TATGTATATAGAGAGAAAAGCA	22	6	NM_002943	-	9149	9170	1	22	20	7A2G11	2	RAR-related orphan receptor A (RORA), transcript variant 3, mRNA
28490	TATGTATATAGAGAGAAAAGCA	22	6	NM_134262	-	8844	8865	1	22	20	7A2G11	2	RAR-related orphan receptor A (RORA), transcript variant 4, mRNA
28634	TGACACTCATCTATGATAATG	21	6	NM_022168	-	1539	1559	1	21	19	5C5T9	2	interferon induced with helicase C domain 1 (IFIH1), mRNA
28653	AGATGAGATCCAGAACATTGA	21	6	NM_018990	+	779	799	1	21	19	5A8A6	2	SAM and SH3 domain containing 3 (SASH3), mRNA
28719	ACAGGCAAAAGCACAGCTGCTG	22	6	NM_152426	-	1643	1663	2	22	20	18C2	2	apolipoprotein B mRNA editing enzyme, catalytic polypeptide-like 3D (APOBEC3D), m	RNA
28719	ACAGGCAAAAGCACAGCTGCTG	22	6	NM_002697	+	516	537	1	22	20	7A1A12	2	POU class 2 homeobox 1 (POU2F1), transcript variant 1, mRNA
28719	ACAGGCAAAAGCACAGCTGCTG	22	6	NM_001198783	+	649	670	1	22	20	7A1A12	2	POU class 2 homeobox 1 (POU2F1), transcript variant 2, mRNA
28719	ACAGGCAAAAGCACAGCTGCTG	22	6	NR_037163	+	560	581	1	22	20	7A1A12	2	POU class 2 homeobox 1 (POU2F1), transcript variant 4, non-coding RNA
28748	CATCTTTCCTTTCTGCTCTGC	21	6	NR_039988	+	1518	1537	1	20	19	15C4	2	uncharacterized LOC100130899 (LOC100130899), non-coding RNA
28842	GAGTTGACACCCTTTTTCACCA	22	6	NM_003938	-	3579	3600	1	22	20	5GA15	2	adaptor-related protein complex 3, delta 1 subunit (AP3D1), transcript variant 2,	mRNA
28842	GAGTTGACACCCTTTTTCACCA	22	6	NM_001077523	-	3456	3477	1	22	20	5GA15	2	adaptor-related protein complex 3, delta 1 subunit (AP3D1), transcript variant 1,	mRNA
29140	TGGGTTACCTCTTGTGTCTGTC	22	6	NM_001171816	+	129	150	1	22	20	6A12G2	2	ring finger protein 166 (RNF166), transcript variant 3, mRNA
29191	TCATGAACTTCTTTCCATCCCA	22	6	NR_033393	-	387	407	1	21	20	17T3	2	TROVE domain family, member 2 (TROVE2), non-coding RNA
29191	TCATGAACTTCTTTCCATCCCA	22	6	NM_001042369	-	982	1002	1	21	20	17T3	2	TROVE domain family, member 2 (TROVE2), transcript variant 1, mRNA
29191	TCATGAACTTCTTTCCATCCCA	22	6	NM_001173524	-	988	1008	1	21	20	17T3	2	TROVE domain family, member 2 (TROVE2), transcript variant 5, mRNA
29191	TCATGAACTTCTTTCCATCCCA	22	6	NM_004600	-	982	1002	1	21	20	17T3	2	TROVE domain family, member 2 (TROVE2), transcript variant 2, mRNA
29191	TCATGAACTTCTTTCCATCCCA	22	6	NM_001042370	-	982	1002	1	21	20	17T3	2	TROVE domain family, member 2 (TROVE2), transcript variant 3, mRNA
29191	TCATGAACTTCTTTCCATCCCA	22	6	NM_001173525	-	982	1002	1	21	20	17T3	2	TROVE domain family, member 2 (TROVE2), transcript variant 4, mRNA
29191	TCATGAACTTCTTTCCATCCCA	22	6	NM_020439	-	2210	2231	1	22	20	15C2C3	2	calcium/calmodulin-dependent protein kinase IG (CAMK1G), mRNA
29378	TATTGGGACATCTGGTGATCC	21	6	NM_020762	+	633	652	2	21	19	7C12	2	SLIT-ROBO Rho GTPase activating protein 1 (SRGAP1), mRNA
29384	CTATAATCTCTGAGTCCTTTG	21	6	NR_037859	+	2382	2402	1	21	19	2A2A15	2	PIR-FIGF readthrough (PIR-FIGF), non-coding RNA
29384	CTATAATCTCTGAGTCCTTTG	21	6	NM_004469	+	1874	1894	1	21	19	2A2A15	2	c-fos induced growth factor (vascular endothelial growth factor D) (FIGF), mRNA
29465	CCTTTCAATGTCCTCTTCTGA	21	6	NM_203395	-	5335	5355	1	21	19	7A6C6	2	iodotyrosine deiodinase (IYD), transcript variant 2, mRNA
29465	CCTTTCAATGTCCTCTTCTGA	21	6	NM_001164694	-	5447	5467	1	21	19	7A6C6	2	iodotyrosine deiodinase (IYD), transcript variant 1, mRNA
29465	CCTTTCAATGTCCTCTTCTGA	21	6	NM_001164695	-	5396	5416	1	21	19	7A6C6	2	iodotyrosine deiodinase (IYD), transcript variant 3, mRNA
29521	ATACTCTCAGTGCTTCATTTG	21	6	NR_036543	+	1567	1586	2	21	19	11C8	2	peptidylprolyl isomerase E (cyclophilin E) (PPIE), transcript variant 3, non-codi	ng RNA
29521	ATACTCTCAGTGCTTCATTTG	21	6	NR_036544	+	1528	1547	2	21	19	11C8	2	peptidylprolyl isomerase E (cyclophilin E) (PPIE), transcript variant 5, non-codi	ng RNA
29521	ATACTCTCAGTGCTTCATTTG	21	6	NM_006112	+	1575	1594	2	21	19	11C8	2	peptidylprolyl isomerase E (cyclophilin E) (PPIE), transcript variant 1, mRNA
30052	CTTTGTCACTTTGTAGTGCTT	21	5	NM_024638	-	1417	1436	2	21	19	11G8	2	queuine tRNA-ribosyltransferase domain containing 1 (QTRTD1), mRNA
30056	AAATAAGTTACACTCTGAGCA	21	5	NM_207374	-	293	312	1	20	19	2A17	2	olfactory receptor, family 10, subfamily W, member 1 (OR10W1), mRNA
30295	TTCTTTCCTTGAGTTGTGACTG	22	5	NM_003895	-	2197	2218	1	22	20	7C4G9	2	synaptojanin 1 (SYNJ1), transcript variant 1, mRNA
30295	TTCTTTCCTTGAGTTGTGACTG	22	5	NM_203446	-	2197	2218	1	22	20	7C4G9	2	synaptojanin 1 (SYNJ1), transcript variant 2, mRNA
30295	TTCTTTCCTTGAGTTGTGACTG	22	5	NM_001160302	-	2205	2226	1	22	20	7C4G9	2	synaptojanin 1 (SYNJ1), transcript variant 3, mRNA
30295	TTCTTTCCTTGAGTTGTGACTG	22	5	NM_001160306	-	2190	2211	1	22	20	7C4G9	2	synaptojanin 1 (SYNJ1), transcript variant 4, mRNA
30517	TCTGCGCAAGCTAAGACAGCC	21	5	NR_003370	+	1346	1366	1	21	19	4C11C4	2	RNA polymerase I transcription factor homolog (S. cerevisiae) pseudogene 1 (RRN3P	1), non-coding RNA
30828	TTGTGGCAGTTTTGGACACAGA	22	5	NM_015938	-	887	908	1	22	20	5G10C5	2	NMD3 homolog (S. cerevisiae) (NMD3), mRNA
30879	ATGAACCACAGTTCCTCTCTTT	22	5	NM_144684	+	542	563	1	22	20	2G15C3	2	zinc finger protein 480 (ZNF480), mRNA
31067	AGATGTCCCAATAACCAAGTG	21	5	NM_012307	+	3839	3858	1	20	19	6C13	2	erythrocyte membrane protein band 4.1-like 3 (EPB41L3), mRNA
31485	TGCAGGCGACACATCAAGGAT	21	5	NR_027002	+	8105	8124	1	20	19	13T6	2	uncharacterized LOC388692 (LOC388692), non-coding RNA
31837	TGTCCAAAACTGCCACAACCT	21	5	NM_182482	-	1827	1847	1	21	19	2T15C2	2	B melanoma antigen family, member 2 (BAGE2), mRNA
31837	TGTCCAAAACTGCCACAACCT	21	5	NM_182484	-	1776	1796	1	21	19	2T15C2	2	B melanoma antigen family, member 5 (BAGE5), mRNA
31837	TGTCCAAAACTGCCACAACCT	21	5	NM_181704	-	1776	1796	1	21	19	2T15C2	2	B melanoma antigen family, member 4 (BAGE4), mRNA
31837	TGTCCAAAACTGCCACAACCT	21	5	NM_182481	-	1827	1847	1	21	19	2T15C2	2	B melanoma antigen family, member 3 (BAGE3), mRNA
31837	TGTCCAAAACTGCCACAACCT	21	5	NM_170606	-	3102	3122	1	21	19	2T15C2	2	myeloid/lymphoid or mixed-lineage leukemia 3 (MLL3), mRNA
32026	TTAGAAGAAATTGTTTATACT	21	5	NR_027856	+	2059	2079	1	21	19	5A9T5	2	CDC-like kinase 1 (CLK1), transcript variant 4, non-coding RNA
32226	AAAGTGGGATGGAAAGAAGTTC	22	5	NM_020439	+	2206	2227	1	22	20	7G2G11	2	calcium/calmodulin-dependent protein kinase IG (CAMK1G), mRNA
32339	ACTATAATCTCTGAGTCCTTTG	22	5	NR_037859	+	2381	2402	1	22	20	3A2A15	2	PIR-FIGF readthrough (PIR-FIGF), non-coding RNA
32339	ACTATAATCTCTGAGTCCTTTG	22	5	NM_004469	+	1873	1894	1	22	20	3A2A15	2	c-fos induced growth factor (vascular endothelial growth factor D) (FIGF), mRNA
32987	TTCTTTCCATCCCACTTTCCT	21	5	NR_034040	-	841	861	1	21	19	8A5C6	2	LGALS8 antisense RNA 1 (non-protein coding) (LGALS8-AS1), non-coding RNA
32987	TTCTTTCCATCCCACTTTCCT	21	5	NM_203394	+	4300	4320	1	21	19	8A3C8	2	E2F transcription factor 7 (E2F7), mRNA
33106	TGAACCACAGTTCCTCTCTTT	21	5	NM_147180	-	3100	3120	1	21	19	4C4G11	2	protein phosphatase 3, regulatory subunit B, beta (PPP3R2), mRNA
33107	TTTCTTCACGTGCTCCATGCC	21	5	NM_004793	-	1510	1530	1	21	19	6C4G9	2	lon peptidase 1, mitochondrial (LONP1), nuclear gene encoding mitochondrial prote	in, mRNA
33521	GAGCGCAAAAGGAAACAGGAGG	22	5	NM_003258	-	1388	1409	1	22	20	4G12G4	2	thymidine kinase 1, soluble (TK1), mRNA
33558	GGTTCCCTTGCTATGCTTTTG	21	5	NM_007121	-	127	146	1	20	19	12A7	2	nuclear receptor subfamily 1, group H, member 2 (NR1H2), mRNA
33900	CATCATCACCCAAACTCCATT	21	5	NM_001204265	-	3467	3486	1	20	19	14C5	2	nuclear receptor subfamily 3, group C, member 1 (glucocorticoid receptor) (NR3C1)	, transcript variant 8, mRNA
33954	AAAGATGGATGAGGCAATGAA	21	5	NM_003319	+	67030	67050	1	21	19	9T6A4	2	titin (TTN), transcript variant N2-B, mRNA
33954	AAAGATGGATGAGGCAATGAA	21	5	NM_133378	+	86521	86541	1	21	19	9T6A4	2	titin (TTN), transcript variant N2-A, mRNA
33954	AAAGATGGATGAGGCAATGAA	21	5	NM_133432	+	67405	67425	1	21	19	9T6A4	2	titin (TTN), transcript variant novex-1, mRNA
33954	AAAGATGGATGAGGCAATGAA	21	5	NM_133437	+	67606	67626	1	21	19	9T6A4	2	titin (TTN), transcript variant novex-2, mRNA
34001	AAAAATAAGTTACACTCTGAGC	22	5	NM_207374	-	293	313	2	22	20	3A17	2	olfactory receptor, family 10, subfamily W, member 1 (OR10W1), mRNA
34230	CCTCCTTCTGTTGTGCCACTG	21	5	NM_001025077	+	1837	1857	1	21	19	6T1T12	2	CUGBP, Elav-like family member 2 (CELF2), transcript variant 3, mRNA
34533	GAGAAAGGAATTGAGGAAGTTC	22	5	NM_214711	-	3398	3419	1	22	20	2G4G14	2	chromosome 4 open reading frame 40 (C4orf40), mRNA
34595	CAACGGAGACTTTTTATTCAA	21	5	NR_026641	+	825	845	1	21	19	9C5A5	2	integrator complex subunit 2 (INTS2), transcript variant 2, non-coding RNA
34595	CAACGGAGACTTTTTATTCAA	21	5	NM_020748	+	544	564	1	21	19	9C5A5	2	integrator complex subunit 2 (INTS2), transcript variant 1, mRNA
35114	ATGGAGTTTGGGTGATGATGG	21	5	NM_001204265	+	3467	3486	1	20	19	5G14	2	nuclear receptor subfamily 3, group C, member 1 (glucocorticoid receptor) (NR3C1)	, transcript variant 8, mRNA
35531	CAGTGGCACAACAGAAGGAGG	21	5	NM_001025077	-	1837	1857	1	21	19	12A1A6	2	CUGBP, Elav-like family member 2 (CELF2), transcript variant 3, mRNA
36179	CACCACCAATCAAAGCAAAGA	21	5	NM_006918	+	6583	6603	1	21	19	4A10C5	2	sterol-C5-desaturase (ERG3 delta-5-desaturase homolog, S. cerevisiae)-like (SC5DL	), transcript variant 1, mRNA
36179	CACCACCAATCAAAGCAAAGA	21	5	NM_001024956	+	6656	6676	1	21	19	4A10C5	2	sterol-C5-desaturase (ERG3 delta-5-desaturase homolog, S. cerevisiae)-like (SC5DL	), transcript variant 2, mRNA
36430	CCATCTTTCCTTTCTGCTCTG	21	5	NR_039988	+	1518	1537	2	21	19	15C4	2	uncharacterized LOC100130899 (LOC100130899), non-coding RNA
36484	TTCATTGCCTCATCCATCTTT	21	5	NM_003319	-	67030	67050	1	21	19	4T6A9	2	titin (TTN), transcript variant N2-B, mRNA
36484	TTCATTGCCTCATCCATCTTT	21	5	NM_133378	-	86521	86541	1	21	19	4T6A9	2	titin (TTN), transcript variant N2-A, mRNA
36484	TTCATTGCCTCATCCATCTTT	21	5	NM_133432	-	67405	67425	1	21	19	4T6A9	2	titin (TTN), transcript variant novex-1, mRNA
36484	TTCATTGCCTCATCCATCTTT	21	5	NM_133437	-	67606	67626	1	21	19	4T6A9	2	titin (TTN), transcript variant novex-2, mRNA
36566	CCTCCACCTCATATTCTTCCTC	22	5	NM_138923	-	5533	5554	1	22	20	5A6A9	2	TAF1 RNA polymerase II, TATA box binding protein (TBP)-associated factor, 250kDa	(TAF1), transcript variant 2, mRNA
36566	CCTCCACCTCATATTCTTCCTC	22	5	NM_182498	-	565	586	1	22	20	5A6A9	2	zinc finger protein 428 (ZNF428), mRNA
36566	CCTCCACCTCATATTCTTCCTC	22	5	NM_004606	-	5596	5617	1	22	20	5A6A9	2	TAF1 RNA polymerase II, TATA box binding protein (TBP)-associated factor, 250kDa	(TAF1), transcript variant 1, mRNA
36566	CCTCCACCTCATATTCTTCCTC	22	5	NM_015241	-	3345	3366	1	22	20	5A1C14	2	microtubule associated monoxygenase, calponin and LIM domain containing 3 (MICAL3	), transcript variant 1, mRNA
36763	TGCTTTGCTGTTGAATAAAAAG	22	5	NM_001153484	+	1923	1944	1	22	20	8T3G9	2	short coiled-coil protein (SCOC), transcript variant 1, mRNA
36763	TGCTTTGCTGTTGAATAAAAAG	22	5	NM_001153552	+	1839	1860	1	22	20	8T3G9	2	short coiled-coil protein (SCOC), transcript variant 3, mRNA
36763	TGCTTTGCTGTTGAATAAAAAG	22	5	NM_032547	+	1928	1949	1	22	20	8T3G9	2	short coiled-coil protein (SCOC), transcript variant 4, mRNA
36763	TGCTTTGCTGTTGAATAAAAAG	22	5	NM_001153663	+	1920	1941	1	22	20	8T3G9	2	short coiled-coil protein (SCOC), transcript variant 2, mRNA
36763	TGCTTTGCTGTTGAATAAAAAG	22	5	NM_001153446	+	1830	1851	1	22	20	8T3G9	2	short coiled-coil protein (SCOC), transcript variant 6, mRNA
36763	TGCTTTGCTGTTGAATAAAAAG	22	5	NM_001153585	+	1963	1984	1	22	20	8T3G9	2	short coiled-coil protein (SCOC), transcript variant 5, mRNA
36763	TGCTTTGCTGTTGAATAAAAAG	22	5	NM_001153635	+	1827	1848	1	22	20	8T3G9	2	short coiled-coil protein (SCOC), transcript variant 7, mRNA
36763	TGCTTTGCTGTTGAATAAAAAG	22	5	NM_001153690	+	1879	1900	1	22	20	8T3G9	2	short coiled-coil protein (SCOC), transcript variant 8, mRNA
36808	TCTCTTTTCTGTAACAGTGCTA	22	5	NM_001206696	+	1547	1568	1	22	20	10G8C2	2	interferon regulatory factor 6 (IRF6), transcript variant 2, mRNA
36808	TCTCTTTTCTGTAACAGTGCTA	22	5	NM_006147	+	1796	1817	1	22	20	10G8C2	2	interferon regulatory factor 6 (IRF6), transcript variant 1, mRNA
36856	TCTTTGCTTTGATTGGTGGTGG	22	5	NM_006918	-	6582	6603	1	22	20	5G10T5	2	sterol-C5-desaturase (ERG3 delta-5-desaturase homolog, S. cerevisiae)-like (SC5DL	), transcript variant 1, mRNA
36856	TCTTTGCTTTGATTGGTGGTGG	22	5	NM_001024956	-	6655	6676	1	22	20	5G10T5	2	sterol-C5-desaturase (ERG3 delta-5-desaturase homolog, S. cerevisiae)-like (SC5DL	), transcript variant 2, mRNA
36941	ACAAAGGACTCAGAGATTATA	21	4	NM_152663	+	886	906	1	21	19	5G10T4	2	Ral GEF with PH domain and SH3 binding motif 2 (RALGPS2), mRNA
37645	TCTTCTCTGAATCATTGGATG	21	4	NM_022136	-	116	135	2	21	19	10T9	2	SAM domain, SH3 domain and nuclear localization signals 1 (SAMSN1), transcript va	riant 1, mRNA
37754	ATGAACCACAGTTCCTCTCTT	21	4	NM_144684	+	542	562	1	21	19	2G15C2	2	zinc finger protein 480 (ZNF480), mRNA
37767	AGTTTGTTTGCGTTTGTTTTG	21	4	NM_173683	-	2380	2399	2	21	19	9C10	2	XK, Kell blood group complex subunit-related family, member 6 (XKR6), transcript	variant 2, mRNA
37859	AATGATCCAAAATGACGAGCG	21	4	NM_001004316	+	2189	2208	1	20	19	15C4	2	leucine, glutamate and lysine rich 1 (LEKR1), transcript variant 1, mRNA
38028	GTGGATTAAAATGGATGGTGA	21	4	NR_038120	+	2145	2165	1	21	19	5T10G4	2	engulfment and cell motility 1 (ELMO1), transcript variant 6, non-coding RNA
38028	GTGGATTAAAATGGATGGTGA	21	4	NR_038121	+	2258	2278	1	21	19	5T10G4	2	engulfment and cell motility 1 (ELMO1), transcript variant 2, non-coding RNA
38028	GTGGATTAAAATGGATGGTGA	21	4	NM_014800	+	3702	3722	1	21	19	5T10G4	2	engulfment and cell motility 1 (ELMO1), transcript variant 1, mRNA
38028	GTGGATTAAAATGGATGGTGA	21	4	NM_001206480	+	3857	3877	1	21	19	5T10G4	2	engulfment and cell motility 1 (ELMO1), transcript variant 4, mRNA
38028	GTGGATTAAAATGGATGGTGA	21	4	NM_001206482	+	4061	4081	1	21	19	5T10G4	2	engulfment and cell motility 1 (ELMO1), transcript variant 5, mRNA
38028	GTGGATTAAAATGGATGGTGA	21	4	NM_001039459	+	2112	2132	1	21	19	5T10G4	2	engulfment and cell motility 1 (ELMO1), transcript variant 3, mRNA
38055	TTTGGATGCTATGGAAGGGAA	21	4	NM_001007794	+	601	621	1	21	19	12G2A5	2	choline/ethanolamine phosphotransferase 1 (CEPT1), transcript variant 2, mRNA
38055	TTTGGATGCTATGGAAGGGAA	21	4	NM_006090	+	563	583	1	21	19	12G2A5	2	choline/ethanolamine phosphotransferase 1 (CEPT1), transcript variant 1, mRNA
38084	TCCTCCGCATTCTTTCCCATG	21	4	NR_024011	+	19	39	1	21	19	5C9C5	2	FP944 (LOC286367), non-coding RNA
38149	TTGTAGAAGAAAGCAGCGCAT	21	4	NM_018566	+	1520	1540	1	21	19	15G1G3	2	YOD1 OTU deubiquinating enzyme 1 homolog (S. cerevisiae) (YOD1), mRNA
38149	TTGTAGAAGAAAGCAGCGCAT	21	4	NM_018566	+	1413	1433	1	21	19	15G1G3	2	YOD1 OTU deubiquinating enzyme 1 homolog (S. cerevisiae) (YOD1), mRNA
38256	AACCCTCTCATCCTCAATGTC	21	4	NM_002867	-	625	645	1	21	19	9A5A5	2	RAB3B, member RAS oncogene family (RAB3B), mRNA
38354	TGACATTGAGGATGAGAGGGTT	22	4	NM_002867	+	624	645	1	22	20	6T5T9	2	RAB3B, member RAS oncogene family (RAB3B), mRNA
38533	CAAAACGAATCATGCTGTAAT	21	4	NM_001938	-	1920	1940	1	21	19	5C4C10	2	down-regulator of transcription 1, TBP-binding (negative cofactor 2) (DR1), mRNA
38754	CTAACATTCTCTGCCAATGGT	21	4	NM_002600	+	3379	3399	1	21	19	8CT11	2	phosphodiesterase 4B, cAMP-specific (PDE4B), transcript variant a, mRNA
38754	CTAACATTCTCTGCCAATGGT	21	4	NM_001037339	+	2997	3017	1	21	19	8CT11	2	phosphodiesterase 4B, cAMP-specific (PDE4B), transcript variant b, mRNA
38754	CTAACATTCTCTGCCAATGGT	21	4	NM_001037340	+	3388	3408	1	21	19	8CT11	2	phosphodiesterase 4B, cAMP-specific (PDE4B), transcript variant c, mRNA
38754	CTAACATTCTCTGCCAATGGT	21	4	NM_001037341	+	3424	3444	1	21	19	8CT11	2	phosphodiesterase 4B, cAMP-specific (PDE4B), transcript variant d, mRNA
38787	TTCCCTGTCTCTCAAATTTCTT	22	4	NR_026646	-	964	985	1	22	20	9T2C9	2	Prader-Willi region non-protein coding RNA 1 (PWRN1), non-coding RNA
39162	TTCTCATTATTGATTCAGATG	21	4	NM_005499	+	1830	1850	1	21	19	7TA12	2	ubiquitin-like modifier activating enzyme 2 (UBA2), mRNA
39268	TCTAGTTTCAGGATGAAAAAC	21	4	NM_007045	-	362	381	2	21	19	11A8	2	FGFR1 oncogene partner (FGFR1OP), transcript variant 1, mRNA
39268	TCTAGTTTCAGGATGAAAAAC	21	4	NM_194429	-	362	381	2	21	19	11A8	2	FGFR1 oncogene partner (FGFR1OP), transcript variant 2, mRNA
39370	TTTTCTTTCCTTGAGTTGTGAC	22	4	NM_001242614	-	3510	3531	1	22	20	2T12T6	2	CD99 molecule-like 2 (CD99L2), transcript variant 5, mRNA
39370	TTTTCTTTCCTTGAGTTGTGAC	22	4	NM_134445	-	3264	3285	1	22	20	2T12T6	2	CD99 molecule-like 2 (CD99L2), transcript variant 3, mRNA
39370	TTTTCTTTCCTTGAGTTGTGAC	22	4	NM_031462	-	3480	3501	1	22	20	2T12T6	2	CD99 molecule-like 2 (CD99L2), transcript variant 1, mRNA
39370	TTTTCTTTCCTTGAGTTGTGAC	22	4	NM_134446	-	3333	3354	1	22	20	2T12T6	2	CD99 molecule-like 2 (CD99L2), transcript variant 2, mRNA
39370	TTTTCTTTCCTTGAGTTGTGAC	22	4	NM_001184808	-	3261	3282	1	22	20	2T12T6	2	CD99 molecule-like 2 (CD99L2), transcript variant 4, mRNA
39590	ATTACAGCATGATTCGTTTTG	21	4	NM_001938	+	1920	1940	1	21	19	10G4G5	2	down-regulator of transcription 1, TBP-binding (negative cofactor 2) (DR1), mRNA
39662	ATTCACCACATTGTTCATTTG	21	4	NM_134470	-	1344	1364	1	21	19	10T4C5	2	interleukin 1 receptor accessory protein (IL1RAP), transcript variant 2, mRNA
39662	ATTCACCACATTGTTCATTTG	21	4	NM_001167930	-	1257	1277	1	21	19	10T4C5	2	interleukin 1 receptor accessory protein (IL1RAP), transcript variant 5, mRNA
39964	TTTCCTGATTGCAGAGACACT	21	4	NM_138771	-	1701	1721	1	21	19	9T3G7	2	coiled-coil domain containing 126 (CCDC126), mRNA
40133	TTGTATCTGTCTTTTCTTTCC	21	4	NM_006940	-	2564	2584	1	21	19	6C3C10	2	SRY (sex determining region Y)-box 5 (SOX5), transcript variant 1, mRNA
40133	TTGTATCTGTCTTTTCTTTCC	21	4	NM_152989	-	2794	2814	1	21	19	6C3C10	2	SRY (sex determining region Y)-box 5 (SOX5), transcript variant 2, mRNA
40133	TTGTATCTGTCTTTTCTTTCC	21	4	NM_178010	-	1326	1346	1	21	19	6C3C10	2	SRY (sex determining region Y)-box 5 (SOX5), transcript variant 3, mRNA
40312	ACTGTGTCATGGCAAGAAGCT	21	4	NM_001202858	+	19	39	1	21	19	4T9A6	2	extracellular matrix protein 1 (ECM1), transcript variant 3, mRNA
40312	ACTGTGTCATGGCAAGAAGCT	21	4	NM_022664	+	19	39	1	21	19	4T9A6	2	extracellular matrix protein 1 (ECM1), transcript variant 2, mRNA
40312	ACTGTGTCATGGCAAGAAGCT	21	4	NM_004425	+	19	39	1	21	19	4T9A6	2	extracellular matrix protein 1 (ECM1), transcript variant 1, mRNA
40424	TTTTGAAATGAGAGATGGTCT	21	4	NM_003343	+	2080	2100	1	21	19	9G2A8	2	ubiquitin-conjugating enzyme E2G 2 (UBE2G2), transcript variant 1, mRNA
40424	TTTTGAAATGAGAGATGGTCT	21	4	NM_001202489	+	1998	2018	1	21	19	9G2A8	2	ubiquitin-conjugating enzyme E2G 2 (UBE2G2), transcript variant 3, mRNA
40424	TTTTGAAATGAGAGATGGTCT	21	4	NM_182688	+	2195	2215	1	21	19	9G2A8	2	ubiquitin-conjugating enzyme E2G 2 (UBE2G2), transcript variant 2, mRNA
41218	AAAAATAAGTTACACTCTGAG	21	4	NM_207374	-	294	313	2	21	19	3A16	2	olfactory receptor, family 10, subfamily W, member 1 (OR10W1), mRNA
41310	ACATTGTTTCCTTGTGACCAT	21	4	NM_020718	-	8675	8694	1	20	19	5G14	2	ubiquitin specific peptidase 31 (USP31), mRNA
41344	AAAGTTGGCTTTGCATTTTCG	21	4	NM_002737	+	8166	8185	1	20	19	4T15	2	protein kinase C, alpha (PRKCA), mRNA
41431	AGTCTCCTTTCAATGTCCTCT	21	4	NM_144985	+	1800	1819	2	21	19	12T7	2	cadherin 24, type 2 (CDH24), transcript variant 2, mRNA
41431	AGTCTCCTTTCAATGTCCTCT	21	4	NM_022478	+	1914	1933	2	21	19	12T7	2	cadherin 24, type 2 (CDH24), transcript variant 1, mRNA
41751	TTGAACCTGAAAGGATAGTTTC	22	4	NM_015480	+	3238	3258	1	21	20	5C15	2	poliovirus receptor-related 3 (PVRL3), transcript variant 1, mRNA
41751	TTGAACCTGAAAGGATAGTTTC	22	4	NM_001243286	+	3212	3232	1	21	20	5C15	2	poliovirus receptor-related 3 (PVRL3), transcript variant 2, mRNA
42443	AACTGGACACACGATGGATGA	21	4	NM_182597	+	602	622	1	21	19	7C3C9	2	chromosome 7 open reading frame 53 (C7orf53), transcript variant 1, mRNA
42443	AACTGGACACACGATGGATGA	21	4	NM_001134468	+	396	416	1	21	19	7C3C9	2	chromosome 7 open reading frame 53 (C7orf53), transcript variant 2, mRNA
42452	AGTTGGAGTTGCGTGGCTGTCT	22	4	NM_016034	-	433	454	1	22	20	2T5T13	2	mitochondrial ribosomal protein S2 (MRPS2), nuclear gene encoding mitochondrial p	rotein, mRNA
42714	TCTTCCTTTGGCTGTTCCTCT	21	4	NM_022356	-	764	783	2	21	19	6T13	2	leucine proline-enriched proteoglycan (leprecan) 1 (LEPRE1), transcript variant 1	, mRNA
42714	TCTTCCTTTGGCTGTTCCTCT	21	4	NM_001146289	-	764	783	2	21	19	6T13	2	leucine proline-enriched proteoglycan (leprecan) 1 (LEPRE1), transcript variant 2	, mRNA
42714	TCTTCCTTTGGCTGTTCCTCT	21	4	NM_001243246	-	764	783	2	21	19	6T13	2	leucine proline-enriched proteoglycan (leprecan) 1 (LEPRE1), transcript variant 3	, mRNA
42714	TCTTCCTTTGGCTGTTCCTCT	21	4	NM_004407	-	278	298	1	21	19	5C4G10	2	dentin matrix acidic phosphoprotein 1 (DMP1), transcript variant 1, mRNA
42962	AAGCTTGGACTGCGTCAGTGC	21	4	NM_000084	+	2361	2381	1	21	19	5T8T6	2	chloride channel 5 (CLCN5), transcript variant 3, mRNA
42962	AAGCTTGGACTGCGTCAGTGC	21	4	NM_001127898	+	2705	2725	1	21	19	5T8T6	2	chloride channel 5 (CLCN5), transcript variant 2, mRNA
42962	AAGCTTGGACTGCGTCAGTGC	21	4	NM_001127899	+	2964	2984	1	21	19	5T8T6	2	chloride channel 5 (CLCN5), transcript variant 1, mRNA
43036	TTTCAAGCATTTCCTTTCCAA	21	4	NM_144967	+	968	988	1	21	19	6GC13	2	Rho GTPase activating protein 36 (ARHGAP36), mRNA
43938	GCAGAGCAGAAAGGAAAGATG	21	4	NR_039988	-	1518	1537	2	21	19	4G15	2	uncharacterized LOC100130899 (LOC100130899), non-coding RNA
44258	AGTTGACACCCTTTTTCACCA	21	4	NM_003938	-	3579	3599	1	21	19	4GA15	2	adaptor-related protein complex 3, delta 1 subunit (AP3D1), transcript variant 2,	mRNA
44258	AGTTGACACCCTTTTTCACCA	21	4	NM_001077523	-	3456	3476	1	21	19	4GA15	2	adaptor-related protein complex 3, delta 1 subunit (AP3D1), transcript variant 1,	mRNA
44380	AATCTCAACATTACCCATCTG	21	4	NM_001031812	+	603	623	1	21	19	3C1C15	2	casein kinase 1, gamma 3 (CSNK1G3), transcript variant 2, mRNA
44380	AATCTCAACATTACCCATCTG	21	4	NM_001044722	+	603	623	1	21	19	3C1C15	2	casein kinase 1, gamma 3 (CSNK1G3), transcript variant 3, mRNA
44380	AATCTCAACATTACCCATCTG	21	4	NM_004384	+	603	623	1	21	19	3C1C15	2	casein kinase 1, gamma 3 (CSNK1G3), transcript variant 1, mRNA
44380	AATCTCAACATTACCCATCTG	21	4	NM_001044723	+	603	623	1	21	19	3C1C15	2	casein kinase 1, gamma 3 (CSNK1G3), transcript variant 4, mRNA
44454	TTAGTGCTTCCTTTTTGCTTTC	22	4	NM_001455	-	6293	6314	1	22	20	4T1C15	2	forkhead box O3 (FOXO3), transcript variant 1, mRNA
44454	TTAGTGCTTCCTTTTTGCTTTC	22	4	NM_201559	-	6266	6287	1	22	20	4T1C15	2	forkhead box O3 (FOXO3), transcript variant 2, mRNA
44549	CCAGAAACAGTCAAAGTACCTT	22	4	NR_045628	-	2379	2400	1	22	20	10TC10	2	sodium channel, voltage-gated, type VII, alpha (SCN7A), transcript variant 2, non	#NAME?
44558	TCTCTTGCCCTATTTGGTGTT	21	4	NM_018364	+	2794	2814	1	21	19	9C6G4	2	round spermatid basic protein 1 (RSBN1), mRNA
44559	CCAGGGCGAGAGTGTGAGTTC	21	4	NM_014239	-	831	851	1	21	19	4G2G13	2	eukaryotic translation initiation factor 2B, subunit 2 beta, 39kDa (EIF2B2), mRNA
45385	TTCTTGAAAGCGTCTTTATTCA	22	4	NM_001202429	-	227	248	1	22	20	10C5T5	2	ankyrin repeat and SOCS box containing 2 (ASB2), transcript variant 1, mRNA
46027	ACTAGTGCTCGAAGACCACAG	21	4	NM_006943	-	3014	3034	1	21	19	6G3G10	2	SRY (sex determining region Y)-box 12 (SOX12), mRNA
46794	CTCCACCTCATATTCTTCCTC	21	4	NM_001142769	-	4890	4909	2	21	19	3A16	2	protocadherin-related 15 (PCDH15), transcript variant I, mRNA
46794	CTCCACCTCATATTCTTCCTC	21	4	NM_001142771	-	4869	4888	2	21	19	3A16	2	protocadherin-related 15 (PCDH15), transcript variant K, mRNA
46794	CTCCACCTCATATTCTTCCTC	21	4	NM_001142770	-	4925	4944	2	21	19	3A16	2	protocadherin-related 15 (PCDH15), transcript variant J, mRNA
46794	CTCCACCTCATATTCTTCCTC	21	4	NM_001142772	-	4854	4873	2	21	19	3A16	2	protocadherin-related 15 (PCDH15), transcript variant L, mRNA
46794	CTCCACCTCATATTCTTCCTC	21	4	NM_138923	-	5533	5553	1	21	19	4A6A9	2	TAF1 RNA polymerase II, TATA box binding protein (TBP)-associated factor, 250kDa	(TAF1), transcript variant 2, mRNA
46794	CTCCACCTCATATTCTTCCTC	21	4	NM_182498	-	565	585	1	21	19	4A6A9	2	zinc finger protein 428 (ZNF428), mRNA
46794	CTCCACCTCATATTCTTCCTC	21	4	NM_004606	-	5596	5616	1	21	19	4A6A9	2	TAF1 RNA polymerase II, TATA box binding protein (TBP)-associated factor, 250kDa	(TAF1), transcript variant 1, mRNA
46794	CTCCACCTCATATTCTTCCTC	21	4	NM_015241	-	3345	3365	1	21	19	4A1C14	2	microtubule associated monoxygenase, calponin and LIM domain containing 3 (MICAL3	), transcript variant 1, mRNA
46977	CTTGGATGCTTGTTTTCTATC	21	4	NM_015306	-	10458	10478	1	21	19	2T15A2	2	ubiquitin specific peptidase 24 (USP24), mRNA
47300	TTTCTTTGCTGTGCTCACAATA	22	4	NM_005224	-	2343	2363	1	21	20	12G8	2	AT rich interactive domain 3A (BRIGHT-like) (ARID3A), mRNA
47494	TCTGTACCCAGAACAGTGGCA	21	4	NM_001896	-	880	900	1	21	19	14AG5	2	casein kinase 2, alpha prime polypeptide (CSNK2A2), mRNA
48408	TATAATCTCTGAGTCCTTTGT	21	4	NM_152663	-	886	906	1	21	19	4A10C5	2	Ral GEF with PH domain and SH3 binding motif 2 (RALGPS2), mRNA
48548	TTGGAAAGGAAATGCTTGAAA	21	4	NM_144967	-	968	988	1	21	19	13GC6	2	Rho GTPase activating protein 36 (ARHGAP36), mRNA
49195	AGATGTGTGAGAAGATAGAAA	21	3	NR_037884	+	2279	2299	1	21	19	5T9T5	2	uncharacterized LOC100507053 (LOC100507053), non-coding RNA
49195	AGATGTGTGAGAAGATAGAAA	21	3	NM_178140	-	11393	11413	1	21	19	9A6A4	2	PDZ domain containing 2 (PDZD2), mRNA
49282	CCTTCCATAGCATCCAAAACC	21	3	NR_036441	-	242	262	1	21	19	9G6A4	2	vaccinia related kinase 2 (VRK2), transcript variant 6, non-coding RNA
49282	CCTTCCATAGCATCCAAAACC	21	3	NM_006296	-	247	267	1	21	19	9G6A4	2	vaccinia related kinase 2 (VRK2), transcript variant 1, mRNA
49282	CCTTCCATAGCATCCAAAACC	21	3	NM_001130480	-	242	262	1	21	19	9G6A4	2	vaccinia related kinase 2 (VRK2), transcript variant 2, mRNA
49282	CCTTCCATAGCATCCAAAACC	21	3	NM_001130482	-	188	208	1	21	19	9G6A4	2	vaccinia related kinase 2 (VRK2), transcript variant 4, mRNA
49282	CCTTCCATAGCATCCAAAACC	21	3	NM_001130483	-	242	262	1	21	19	9G6A4	2	vaccinia related kinase 2 (VRK2), transcript variant 5, mRNA
49282	CCTTCCATAGCATCCAAAACC	21	3	NM_001130481	-	84	104	1	21	19	9G6A4	2	vaccinia related kinase 2 (VRK2), transcript variant 3, mRNA
49471	CTGTTTCCTCCTGTTTCCTTT	21	3	NM_053055	+	4660	4680	1	21	19	9C2G8	2	thioesterase superfamily member 4 (THEM4), mRNA
49535	ATTTTGCTGCGTGTAGTCTCTT	22	3	NM_001161778	+	2170	2191	1	22	20	2T6C12	2	pyruvate dehyrogenase phosphatase catalytic subunit 1 (PDP1), nuclear gene encodi	ng mitochondrial protein, transcript variant 1, mRNA
49535	ATTTTGCTGCGTGTAGTCTCTT	22	3	NM_001161779	+	2295	2316	1	22	20	2T6C12	2	pyruvate dehyrogenase phosphatase catalytic subunit 1 (PDP1), nuclear gene encodi	ng mitochondrial protein, transcript variant 2, mRNA
49535	ATTTTGCTGCGTGTAGTCTCTT	22	3	NM_001161780	+	2169	2190	1	22	20	2T6C12	2	pyruvate dehyrogenase phosphatase catalytic subunit 1 (PDP1), nuclear gene encodi	ng mitochondrial protein, transcript variant 3, mRNA
49535	ATTTTGCTGCGTGTAGTCTCTT	22	3	NM_001161781	+	2156	2177	1	22	20	2T6C12	2	pyruvate dehyrogenase phosphatase catalytic subunit 1 (PDP1), nuclear gene encodi	ng mitochondrial protein, transcript variant 4, mRNA
49535	ATTTTGCTGCGTGTAGTCTCTT	22	3	NM_018444	+	2213	2234	1	22	20	2T6C12	2	pyruvate dehyrogenase phosphatase catalytic subunit 1 (PDP1), nuclear gene encodi	ng mitochondrial protein, transcript variant 5, mRNA
49548	CATTCTTGTCCAACTGATTAT	21	3	NM_152558	+	6775	6795	1	21	19	9C5G5	2	IQ motif containing E (IQCE), transcript variant 1, mRNA
49548	CATTCTTGTCCAACTGATTAT	21	3	NM_001100390	+	6727	6747	1	21	19	9C5G5	2	IQ motif containing E (IQCE), transcript variant 2, mRNA
51005	TTTGTTTGCGTTTGTTTTGTT	21	3	NM_005744	-	2050	2069	2	21	19	7C12	2	ariadne homolog, ubiquitin-conjugating enzyme E2 binding protein, 1 (Drosophila)	(ARIH1), mRNA
51005	TTTGTTTGCGTTTGTTTTGTT	21	3	NM_015065	+	7080	7100	1	21	19	8CG11	2	exophilin 5 (EXPH5), mRNA
51005	TTTGTTTGCGTTTGTTTTGTT	21	3	NM_173569	+	7883	7903	1	21	19	9G3G7	2	ubinuclein 2 (UBN2), mRNA
51005	TTTGTTTGCGTTTGTTTTGTT	21	3	NM_182584	+	1892	1912	1	21	19	8CG11	2	chromosome 20 open reading frame 203 (C20orf203), mRNA
51005	TTTGTTTGCGTTTGTTTTGTT	21	3	NM_000044	-	710	730	1	21	19	7GC12	2	androgen receptor (AR), transcript variant 1, mRNA
51330	TGCTCAGAGTGTAACTTATTTT	22	3	NM_207374	+	293	313	2	22	20	17T3	2	olfactory receptor, family 10, subfamily W, member 1 (OR10W1), mRNA
51339	AAATCTGTTTCCTCCTGTTTCC	22	3	NR_033373	+	2272	2293	1	22	20	11C4G5	2	uncharacterized FLJ39534 (FLJ39534), non-coding RNA
51824	TTCTTGAAAGCGTCTTTATTC	21	3	NM_001202429	-	228	248	1	21	19	10C5T4	2	ankyrin repeat and SOCS box containing 2 (ASB2), transcript variant 1, mRNA
52062	CGGAACTTCCTCAATTCCTTT	21	3	NM_214711	+	3397	3416	2	21	19	15C4	2	chromosome 4 open reading frame 40 (C4orf40), mRNA
52179	AAAGAATAACCAGTAACAGAA	21	3	NM_017801	-	1021	1041	1	21	19	7A3A9	2	CKLF-like MARVEL transmembrane domain containing 6 (CMTM6), mRNA
52528	CATGAACTTCTTTCCATCCCAC	22	3	NM_020439	-	2209	2230	1	22	20	14C2C4	2	calcium/calmodulin-dependent protein kinase IG (CAMK1G), mRNA
53184	CTTCTTTCCATCCCACTTTCC	21	3	NM_203394	+	4299	4319	1	21	19	9A3C7	2	E2F transcription factor 7 (E2F7), mRNA
53291	ACCAAAGTCGATATCAACAAT	21	3	NM_000970	+	648	668	1	21	19	6G9A4	2	ribosomal protein L6 (RPL6), transcript variant 2, mRNA
53291	ACCAAAGTCGATATCAACAAT	21	3	NM_001024662	+	824	844	1	21	19	6G9A4	2	ribosomal protein L6 (RPL6), transcript variant 1, mRNA
53924	CTTCAGATGGTCACAAGGAAAC	22	3	NM_014554	+	1038	1059	1	22	20	2T12A6	2	SUMO1/sentrin specific peptidase 1 (SENP1), mRNA
54106	ATGAGGAAGAATATGAGGTGG	21	3	NM_001142769	+	4889	4908	2	21	19	17T2	2	protocadherin-related 15 (PCDH15), transcript variant I, mRNA
54106	ATGAGGAAGAATATGAGGTGG	21	3	NM_001142771	+	4868	4887	2	21	19	17T2	2	protocadherin-related 15 (PCDH15), transcript variant K, mRNA
54106	ATGAGGAAGAATATGAGGTGG	21	3	NM_001142770	+	4924	4943	2	21	19	17T2	2	protocadherin-related 15 (PCDH15), transcript variant J, mRNA
54106	ATGAGGAAGAATATGAGGTGG	21	3	NM_001142772	+	4853	4872	2	21	19	17T2	2	protocadherin-related 15 (PCDH15), transcript variant L, mRNA
54205	TGCTCAGAGTGTAACTTATTT	21	3	NM_207374	+	293	312	2	21	19	17T2	2	olfactory receptor, family 10, subfamily W, member 1 (OR10W1), mRNA
54269	TGCTTTGCTGTTGAATAAAAA	21	3	NM_001153484	+	1923	1943	1	21	19	8T3G8	2	short coiled-coil protein (SCOC), transcript variant 1, mRNA
54269	TGCTTTGCTGTTGAATAAAAA	21	3	NM_001153552	+	1839	1859	1	21	19	8T3G8	2	short coiled-coil protein (SCOC), transcript variant 3, mRNA
54269	TGCTTTGCTGTTGAATAAAAA	21	3	NM_032547	+	1928	1948	1	21	19	8T3G8	2	short coiled-coil protein (SCOC), transcript variant 4, mRNA
54269	TGCTTTGCTGTTGAATAAAAA	21	3	NM_001153663	+	1920	1940	1	21	19	8T3G8	2	short coiled-coil protein (SCOC), transcript variant 2, mRNA
54269	TGCTTTGCTGTTGAATAAAAA	21	3	NM_001153446	+	1830	1850	1	21	19	8T3G8	2	short coiled-coil protein (SCOC), transcript variant 6, mRNA
54269	TGCTTTGCTGTTGAATAAAAA	21	3	NM_001153585	+	1963	1983	1	21	19	8T3G8	2	short coiled-coil protein (SCOC), transcript variant 5, mRNA
54269	TGCTTTGCTGTTGAATAAAAA	21	3	NM_001153635	+	1827	1847	1	21	19	8T3G8	2	short coiled-coil protein (SCOC), transcript variant 7, mRNA
54269	TGCTTTGCTGTTGAATAAAAA	21	3	NM_001153690	+	1879	1899	1	21	19	8T3G8	2	short coiled-coil protein (SCOC), transcript variant 8, mRNA
54364	ACTTTTCCTTTCTTTGACAAA	21	3	NM_020883	+	5584	5604	1	21	19	6C7T6	2	zinc finger, SWIM-type containing 5 (ZSWIM5), mRNA
54795	CTCCCAACTAAGATCCTTGAT	21	3	NM_007145	-	980	1000	1	21	19	12AT7	2	zinc finger protein 146 (ZNF146), transcript variant 1, mRNA
54795	CTCCCAACTAAGATCCTTGAT	21	3	NM_001099638	-	906	926	1	21	19	12AT7	2	zinc finger protein 146 (ZNF146), transcript variant 2, mRNA
54795	CTCCCAACTAAGATCCTTGAT	21	3	NM_001099639	-	865	885	1	21	19	12AT7	2	zinc finger protein 146 (ZNF146), transcript variant 3, mRNA
55042	GGGTTCTTTGCTTGTCTCAAG	21	3	NM_002924	-	1276	1295	2	21	19	13T6	2	regulator of G-protein signaling 7 (RGS7), mRNA
55102	TGTGGCAGTTTTGGACACAGA	21	3	NM_015235	-	492	511	2	21	19	5A14	2	cleavage stimulation factor, 3' pre-RNA, subunit 2, 64kDa, tau variant (CSTF2T),	mRNA
55697	CAACAAACATCATTGAAAATG	21	3	NM_001510	-	449	469	1	21	19	8A3T8	2	glutamate receptor, ionotropic, delta 2 (GRID2), mRNA
56096	AATGAAATTGATGGTGAAAAAG	22	3	NM_001206927	+	10164	10184	2	22	20	11G9	2	dynein, axonemal, heavy chain 8 (DNAH8), mRNA
56268	AAGGTTGATGGTAGAACTATGC	22	3	NM_003319	+	4522	4543	1	22	20	7A7A6	2	titin (TTN), transcript variant N2-B, mRNA
56268	AAGGTTGATGGTAGAACTATGC	22	3	NM_133378	+	4660	4681	1	22	20	7A7A6	2	titin (TTN), transcript variant N2-A, mRNA
56268	AAGGTTGATGGTAGAACTATGC	22	3	NM_133379	+	4660	4681	1	22	20	7A7A6	2	titin (TTN), transcript variant novex-3, mRNA
56268	AAGGTTGATGGTAGAACTATGC	22	3	NM_133432	+	4522	4543	1	22	20	7A7A6	2	titin (TTN), transcript variant novex-1, mRNA
56268	AAGGTTGATGGTAGAACTATGC	22	3	NM_133437	+	4522	4543	1	22	20	7A7A6	2	titin (TTN), transcript variant novex-2, mRNA
56691	CTCATAAAGACATCAAACAAA	21	3	NR_037875	+	702	722	1	21	19	12TC7	2	uncharacterized LOC728730 (LOC728730), non-coding RNA
56789	CTTCCTTTTTGCTTTCCTTTC	21	3	NM_004098	+	647	666	2	21	19	9G10	2	empty spiracles homeobox 2 (EMX2), transcript variant 1, mRNA
56789	CTTCCTTTTTGCTTTCCTTTC	21	3	NM_001165924	+	647	666	2	21	19	9G10	2	empty spiracles homeobox 2 (EMX2), transcript variant 2, mRNA
57631	TCATCAGGATCAGTTACAAATA	22	3	NM_024582	-	8681	8702	1	22	20	11A3A6	2	FAT tumor suppressor homolog 4 (Drosophila) (FAT4), mRNA
57687	GCTTTTGTATCTGTCTTTTCTT	22	3	NM_001008388	-	1966	1986	1	21	20	10C10	2	CDGSH iron sulfur domain 2 (CISD2), mRNA
57767	TTATTATGTCAACAATCCACA	21	3	NM_001161577	-	1802	1822	1	21	19	9C6C4	2	sterile alpha motif domain containing 4A (SAMD4A), transcript variant 3, mRNA
57767	TTATTATGTCAACAATCCACA	21	3	NM_015589	-	3065	3085	1	21	19	9C6C4	2	sterile alpha motif domain containing 4A (SAMD4A), transcript variant 1, mRNA
57767	TTATTATGTCAACAATCCACA	21	3	NM_001161576	-	2801	2821	1	21	19	9C6C4	2	sterile alpha motif domain containing 4A (SAMD4A), transcript variant 2, mRNA
58533	AGGAAGAATATGAGGTGGAGG	21	3	NM_015241	+	3346	3366	1	21	19	13G1T5	2	microtubule associated monoxygenase, calponin and LIM domain containing 3 (MICAL3	), transcript variant 1, mRNA
58544	CTACCTCGCACAACAAAGTAT	21	3	NM_001145205	+	2807	2826	2	21	19	5C14	2	shisa homolog 9 (Xenopus laevis) (SHISA9), transcript variant 2, mRNA
59446	ATGGCTGTCCACTGTTGTTCC	21	3	NM_153840	-	2624	2643	2	21	19	12G7	2	G protein-coupled receptor 110 (GPR110), transcript variant 1, mRNA
59462	ACAAAATCGTCCCTTAGGAGAG	22	3	NM_024086	-	321	341	2	22	20	7G13	2	methyltransferase like 16 (METTL16), mRNA
59481	CCTCCACCTCATATTCTTCCT	21	3	NM_015241	-	3346	3366	1	21	19	5A1C13	2	microtubule associated monoxygenase, calponin and LIM domain containing 3 (MICAL3	), transcript variant 1, mRNA
59839	ACTGTTTCTTTTTCTTTTCCT	21	3	NM_207410	+	1382	1401	2	21	19	17C2	2	GDNF family receptor alpha like (GFRAL), mRNA
59864	TTGCTTCTCTTGCCCTATTTG	21	3	NM_207333	+	4831	4850	1	20	19	7T12	2	zinc finger protein 320 (ZNF320), mRNA
60052	ATGCGCTGCTTTCTTCTACAA	21	3	NM_018566	-	1413	1433	1	21	19	3C1C15	2	YOD1 OTU deubiquinating enzyme 1 homolog (S. cerevisiae) (YOD1), mRNA
60052	ATGCGCTGCTTTCTTCTACAA	21	3	NM_018566	-	1520	1540	1	21	19	3C1C15	2	YOD1 OTU deubiquinating enzyme 1 homolog (S. cerevisiae) (YOD1), mRNA
60281	TCATCCATCGTGTGTCCAGTT	21	3	NM_182597	-	602	622	1	21	19	9G3G7	2	chromosome 7 open reading frame 53 (C7orf53), transcript variant 1, mRNA
60281	TCATCCATCGTGTGTCCAGTT	21	3	NM_001134468	-	396	416	1	21	19	9G3G7	2	chromosome 7 open reading frame 53 (C7orf53), transcript variant 2, mRNA
60525	TTTCTATCTTCTCACACATCTC	22	3	NM_178140	+	11393	11414	1	22	20	4T6T10	2	PDZ domain containing 2 (PDZD2), mRNA
61027	CCAGCAGCTGTGCTTTTGCCTG	22	3	NM_152426	+	1643	1663	2	22	20	2G18	2	apolipoprotein B mRNA editing enzyme, catalytic polypeptide-like 3D (APOBEC3D), m	RNA
61027	CCAGCAGCTGTGCTTTTGCCTG	22	3	NM_002697	-	517	538	1	22	20	13T1T6	2	POU class 2 homeobox 1 (POU2F1), transcript variant 1, mRNA
61027	CCAGCAGCTGTGCTTTTGCCTG	22	3	NM_001198783	-	650	671	1	22	20	13T1T6	2	POU class 2 homeobox 1 (POU2F1), transcript variant 2, mRNA
61027	CCAGCAGCTGTGCTTTTGCCTG	22	3	NR_037163	-	561	582	1	22	20	13T1T6	2	POU class 2 homeobox 1 (POU2F1), transcript variant 4, non-coding RNA
61189	TTTAATTGCCAGATCATAATTG	22	3	NM_198150	-	3267	3288	1	22	20	8C2G10	2	arylsulfatase family, member K (ARSK), mRNA
62171	TTGTTTCCTTGTGACCATCTG	21	3	NM_014554	-	1041	1060	2	21	19	7T12	2	SUMO1/sentrin specific peptidase 1 (SENP1), mRNA
62171	TTGTTTCCTTGTGACCATCTG	21	3	NM_213606	+	464	483	2	21	19	11G8	2	solute carrier family 16, member 12 (monocarboxylic acid transporter 12) (SLC16A1	2), mRNA
62221	TTTTGAATGAAGTTGATTTTA	21	3	NM_004627	+	1288	1308	1	21	19	13TG6	2	tryptophan rich basic protein (WRB), transcript variant 1, mRNA
62221	TTTTGAATGAAGTTGATTTTA	21	3	NM_001146218	+	1178	1198	1	21	19	13TG6	2	tryptophan rich basic protein (WRB), transcript variant 2, mRNA
62363	TTCCTTTTTGCTTTCCTTTCTT	22	3	NM_032831	-	9061	9082	1	22	20	9GC11	2	ORAI calcium release-activated calcium modulator 2 (ORAI2), transcript variant 2,	mRNA
62363	TTCCTTTTTGCTTTCCTTTCTT	22	3	NR_036592	+	3054	3075	1	22	20	10C2T8	2	endogenous Bornavirus-like nucleoprotein 2 pseudogene (LOC100506710), non-coding	RNA
62363	TTCCTTTTTGCTTTCCTTTCTT	22	3	NM_001126340	-	9170	9191	1	22	20	9GC11	2	ORAI calcium release-activated calcium modulator 2 (ORAI2), transcript variant 1,	mRNA
62504	TCATGAACTTCTTTCCATCCC	21	3	NM_020439	-	2211	2231	1	21	19	15C2C2	2	calcium/calmodulin-dependent protein kinase IG (CAMK1G), mRNA
63779	GGTTTTGGATGCTATGGAAGG	21	3	NR_036441	+	242	262	1	21	19	4T6C9	2	vaccinia related kinase 2 (VRK2), transcript variant 6, non-coding RNA
63779	GGTTTTGGATGCTATGGAAGG	21	3	NM_006296	+	247	267	1	21	19	4T6C9	2	vaccinia related kinase 2 (VRK2), transcript variant 1, mRNA
63779	GGTTTTGGATGCTATGGAAGG	21	3	NM_001130480	+	242	262	1	21	19	4T6C9	2	vaccinia related kinase 2 (VRK2), transcript variant 2, mRNA
63779	GGTTTTGGATGCTATGGAAGG	21	3	NM_001130482	+	188	208	1	21	19	4T6C9	2	vaccinia related kinase 2 (VRK2), transcript variant 4, mRNA
63779	GGTTTTGGATGCTATGGAAGG	21	3	NM_001130483	+	242	262	1	21	19	4T6C9	2	vaccinia related kinase 2 (VRK2), transcript variant 5, mRNA
63779	GGTTTTGGATGCTATGGAAGG	21	3	NM_001130481	+	84	104	1	21	19	4T6C9	2	vaccinia related kinase 2 (VRK2), transcript variant 3, mRNA
63960	TCTCTTTCTGGAAAACCTGAA	21	3	NM_022757	-	3990	4010	1	21	19	5T9C5	2	coiled-coil domain containing 14 (CCDC14), mRNA
64129	CCAATTCACCACATTGTTCAT	21	3	NM_004370	-	1128	1148	1	21	19	11CA8	2	collagen, type XII, alpha 1 (COL12A1), transcript variant long, mRNA
65117	GTTCTTTGCTTGTCTCAAGGTC	22	3	NM_002924	-	1273	1294	1	22	20	12T6G2	2	regulator of G-protein signaling 7 (RGS7), mRNA
65814	TATTTGTAACTGATCCTGATG	21	3	NM_024582	+	8681	8701	1	21	19	6T3T10	2	FAT tumor suppressor homolog 4 (Drosophila) (FAT4), mRNA
66006	ATTATGATCTGGCAATTAAAA	21	3	NM_198150	+	3269	3289	1	21	19	8C2G9	2	arylsulfatase family, member K (ARSK), mRNA
66412	AGTTTTATAGGGTTGGTGGTG	21	3	NM_000081	+	3114	3133	1	20	19	11G8	2	lysosomal trafficking regulator (LYST), mRNA
67394	TTGGACAAGAATGGAAATTTTG	22	3	NM_004096	-	6823	6844	1	22	20	4A10A6	2	eukaryotic translation initiation factor 4E binding protein 2 (EIF4EBP2), mRNA
67509	TCATTTGTCAAAGAAAGGAAA	21	3	NM_024694	+	1483	1503	1	21	19	5T6G8	2	androglobin (ADGB), mRNA
67523	TTAGGAAAAACCCAAATGGAC	21	3	NM_015378	-	14029	14048	1	20	19	10C9	2	vacuolar protein sorting 13 homolog D (S. cerevisiae) (VPS13D), transcript varian	t 1, mRNA
67523	TTAGGAAAAACCCAAATGGAC	21	3	NM_018156	-	13954	13973	1	20	19	10C9	2	vacuolar protein sorting 13 homolog D (S. cerevisiae) (VPS13D), transcript varian	t 2, mRNA
67688	CACCACCAACCCTATAAAACT	21	3	NM_000081	-	3114	3133	2	21	19	8C11	2	lysosomal trafficking regulator (LYST), mRNA
67698	ATAAGTGTGATGCAGGTTTTG	21	3	NR_033860	+	2618	2638	1	21	19	13AG6	2	uncharacterized LOC440970 (LOC440970), non-coding RNA
68120	TGCTAAAAAGATGTTGAGATA	21	3	NM_001202855	+	1233	1252	1	20	19	3T16	2	cytochrome P450, family 3, subfamily A, polypeptide 4 (CYP3A4), transcript varian	t 2, mRNA
68120	TGCTAAAAAGATGTTGAGATA	21	3	NM_017460	+	1236	1255	1	20	19	3T16	2	cytochrome P450, family 3, subfamily A, polypeptide 4 (CYP3A4), transcript varian	t 1, mRNA
68389	TATGATTGAAATCCAGAACTT	21	3	NM_003268	-	2155	2175	1	21	19	7G4C8	2	toll-like receptor 5 (TLR5), mRNA
68834	ATCTGTCTTTTCTTTCCTTGA	21	3	NM_003618	-	1652	1672	1	21	19	4G10C5	2	mitogen-activated protein kinase kinase kinase kinase 3 (MAP4K3), mRNA
69112	TGACATTGAGGATGAGAGGGT	21	3	NM_002866	+	580	600	1	21	19	6T9A4	2	RAB3A, member RAS oncogene family (RAB3A), mRNA
69112	TGACATTGAGGATGAGAGGGT	21	3	NM_002867	+	624	644	1	21	19	6T5T8	2	RAB3B, member RAS oncogene family (RAB3B), mRNA
70119	AGAAAAGAGAGGAACTGTGGTT	22	3	NM_144684	-	545	566	1	22	20	2A3G15	2	zinc finger protein 480 (ZNF480), mRNA
70234	GGAGACACAAACCAGGATTTG	21	3	NM_016848	-	2937	2956	1	20	19	17T2	2	SHC (Src homology 2 domain containing) transforming protein 3 (SHC3), mRNA
70535	ATTGTCGAAAATGCAAAGCCA	21	3	NM_006984	+	1383	1403	1	21	19	5C5T9	2	claudin 10 (CLDN10), transcript variant b, mRNA
70535	ATTGTCGAAAATGCAAAGCCA	21	3	NM_001160100	+	1494	1514	1	21	19	5C5T9	2	claudin 10 (CLDN10), transcript variant a_v1, mRNA
70535	ATTGTCGAAAATGCAAAGCCA	21	3	NM_014934	-	6964	6984	1	21	19	5C5T9	2	DAZ interacting protein 1 (DZIP1), transcript variant 1, mRNA
70535	ATTGTCGAAAATGCAAAGCCA	21	3	NM_198968	-	7021	7041	1	21	19	5C5T9	2	DAZ interacting protein 1 (DZIP1), transcript variant 2, mRNA
70535	ATTGTCGAAAATGCAAAGCCA	21	3	NM_182848	+	1551	1571	1	21	19	5C5T9	2	claudin 10 (CLDN10), transcript variant a, mRNA
70793	GGGAGACACAAACCAGGATTTG	22	3	NM_016848	-	2937	2957	1	21	20	18T2	2	SHC (Src homology 2 domain containing) transforming protein 3 (SHC3), mRNA
70888	ATCAAGGATCTTAGTTGGGAG	21	3	NM_007145	+	980	1000	1	21	19	7AT12	2	zinc finger protein 146 (ZNF146), transcript variant 1, mRNA
70888	ATCAAGGATCTTAGTTGGGAG	21	3	NM_001099638	+	906	926	1	21	19	7AT12	2	zinc finger protein 146 (ZNF146), transcript variant 2, mRNA
70888	ATCAAGGATCTTAGTTGGGAG	21	3	NM_001099639	+	865	885	1	21	19	7AT12	2	zinc finger protein 146 (ZNF146), transcript variant 3, mRNA
71178	GCTGGCTGTTGGATGCTTTTCT	22	3	NM_016282	+	479	499	1	21	20	15C5	2	adenylate kinase 3 (AK3), nuclear gene encoding mitochondrial protein, transcript	variant 1, mRNA
71178	GCTGGCTGTTGGATGCTTTTCT	22	3	NM_001199853	+	178	198	1	21	20	15C5	2	adenylate kinase 3 (AK3), transcript variant 3, mRNA
71178	GCTGGCTGTTGGATGCTTTTCT	22	3	NM_001199855	+	185	205	1	21	20	15C5	2	adenylate kinase 3 (AK3), transcript variant 5, mRNA
71178	GCTGGCTGTTGGATGCTTTTCT	22	3	NM_001199856	+	251	271	1	21	20	15C5	2	adenylate kinase 3 (AK3), transcript variant 6, mRNA
71626	AAAAGACAGATACAAAAGCTG	21	3	NM_001008388	+	1968	1987	1	20	19	8G11	2	CDGSH iron sulfur domain 2 (CISD2), mRNA
72043	ACAAAACTAGAACATTTACAGC	22	2	NM_145023	-	1444	1465	1	22	20	8A2A10	2	coiled-coil domain containing 7 (CCDC7), transcript variant 1, mRNA
72043	ACAAAACTAGAACATTTACAGC	22	2	NM_001026383	-	1210	1231	1	22	20	8A2A10	2	coiled-coil domain containing 7 (CCDC7), transcript variant 2, mRNA
74509	CCATCAATTTCATTAAATATG	21	2	NR_003554	-	3814	3833	1	20	19	3T16	2	ubiquitin specific peptidase 32 pseudogene 2 (USP32P2), non-coding RNA
74509	CCATCAATTTCATTAAATATG	21	2	NR_003190	-	2889	2908	1	20	19	3T16	2	ubiquitin specific peptidase 32 pseudogene 1 (USP32P1), non-coding RNA
74509	CCATCAATTTCATTAAATATG	21	2	NM_004505	-	6979	6998	1	20	19	3T16	2	ubiquitin specific peptidase 6 (Tre-2 oncogene) (USP6), mRNA
76129	TTAGTGCTTCCTTTTTGCTTT	21	2	NM_001455	-	6294	6314	1	21	19	4T1C14	2	forkhead box O3 (FOXO3), transcript variant 1, mRNA
76129	TTAGTGCTTCCTTTTTGCTTT	21	2	NM_201559	-	6267	6287	1	21	19	4T1C14	2	forkhead box O3 (FOXO3), transcript variant 2, mRNA
76993	TGCTTCCTTTTTGCTTTCCTT	21	2	NM_018195	-	1192	1211	2	21	19	16C3	2	chromosome 11 open reading frame 57 (C11orf57), transcript variant 1, mRNA
76993	TGCTTCCTTTTTGCTTTCCTT	21	2	NM_001082969	-	634	653	2	21	19	16C3	2	chromosome 11 open reading frame 57 (C11orf57), transcript variant 2, mRNA
76993	TGCTTCCTTTTTGCTTTCCTT	21	2	NM_001082970	-	1189	1208	2	21	19	16C3	2	chromosome 11 open reading frame 57 (C11orf57), transcript variant 3, mRNA
76993	TGCTTCCTTTTTGCTTTCCTT	21	2	NM_130468	-	1914	1934	1	21	19	7T4G8	2	carbohydrate (N-acetylgalactosamine 4-0) sulfotransferase 14 (CHST14), mRNA
78789	CTTGAACCTGAAAGGATAGTTT	22	2	NM_015480	+	3238	3258	2	22	20	5C15	2	poliovirus receptor-related 3 (PVRL3), transcript variant 1, mRNA
78789	CTTGAACCTGAAAGGATAGTTT	22	2	NM_001243286	+	3212	3232	2	22	20	5C15	2	poliovirus receptor-related 3 (PVRL3), transcript variant 2, mRNA
79730	CGAAATGTGGATAAATAAGGA	21	2	NM_003838	+	4177	4197	1	21	19	15T2G2	2	fucose-1-phosphate guanylyltransferase (FPGT), transcript variant 1, mRNA
79730	CGAAATGTGGATAAATAAGGA	21	2	NM_001199328	+	3415	3435	1	21	19	15T2G2	2	fucose-1-phosphate guanylyltransferase (FPGT), transcript variant 3, mRNA
79730	CGAAATGTGGATAAATAAGGA	21	2	NM_001199329	+	3360	3380	1	21	19	15T2G2	2	fucose-1-phosphate guanylyltransferase (FPGT), transcript variant 2, mRNA
79983	ATGCTGTAATTCTCTGGCTCA	21	2	NM_005737	+	3908	3927	2	21	19	15G4	2	ADP-ribosylation factor-like 4C (ARL4C), mRNA
80045	ACCACCACCAATCAAAGCAAA	21	2	NM_001193451	-	7218	7237	2	21	19	7C12	2	transmembrane and tetratricopeptide repeat containing 1 (TMTC1), transcript varia	nt 1, mRNA
80045	ACCACCACCAATCAAAGCAAA	21	2	NM_175861	-	7309	7328	2	21	19	7C12	2	transmembrane and tetratricopeptide repeat containing 1 (TMTC1), transcript varia	nt 2, mRNA
80976	AGGAAAAGAAAAAGAAACAGTG	22	2	NM_024778	+	1158	1179	1	22	20	12A6G2	2	LON peptidase N-terminal domain and ring finger 3 (LONRF3), transcript variant 2,	mRNA
80976	AGGAAAAGAAAAAGAAACAGTG	22	2	NM_001031855	+	1281	1302	1	22	20	12A6G2	2	LON peptidase N-terminal domain and ring finger 3 (LONRF3), transcript variant 1,	mRNA
81230	TCCATGAAGCAACATCTAATA	21	2	NM_002519	+	3581	3601	1	21	19	5G8T6	2	nuclear protein, ataxia-telangiectasia locus (NPAT), mRNA
81272	CTTTGCCTTGTTTTGTTTTGG	21	2	NM_144570	+	3103	3121	2	20	19	19	2	hematological and neurological expressed 1-like (HN1L), mRNA
82365	TTTCCTCTTGCGTTTTGTTAT	21	2	NM_003176	-	1858	1878	1	21	19	4C6G9	2	synaptonemal complex protein 1 (SYCP1), mRNA
82520	AGCAAAGATGAATTTAAGGAA	21	2	NM_004947	+	2928	2948	1	21	19	12T1T6	2	dedicator of cytokinesis 3 (DOCK3), mRNA
82796	TTGCAATTCACTTGGTTGTGTG	22	2	NM_007123	+	4726	4746	2	22	20	9C11	2	Usher syndrome 2A (autosomal recessive, mild) (USH2A), transcript variant 1, mRNA
82796	TTGCAATTCACTTGGTTGTGTG	22	2	NM_206933	+	4726	4746	2	22	20	9C11	2	Usher syndrome 2A (autosomal recessive, mild) (USH2A), transcript variant 2, mRNA
83140	TCCAGGGCGAGAGTGTGAGTT	21	2	NM_006283	-	1798	1818	1	21	19	13TG6	2	transforming, acidic coiled-coil containing protein 1 (TACC1), transcript variant	1, mRNA
83140	TCCAGGGCGAGAGTGTGAGTT	21	2	NM_001122824	-	568	588	1	21	19	13TG6	2	transforming, acidic coiled-coil containing protein 1 (TACC1), transcript variant	2, mRNA
83140	TCCAGGGCGAGAGTGTGAGTT	21	2	NM_001146216	-	1744	1764	1	21	19	13TG6	2	transforming, acidic coiled-coil containing protein 1 (TACC1), transcript variant	3, mRNA
84301	AGCCCATATGTGTTCTAGAAGG	22	2	NM_021235	-	939	959	2	22	20	12T8	2	epidermal growth factor receptor pathway substrate 15-like 1 (EPS15L1), mRNA
85546	CAGAAAGGAAAGATGGGTTTT	21	2	NM_001177876	-	1612	1632	1	21	19	4A10G5	2	proprotein convertase subtilisin/kexin type 1 (PCSK1), transcript variant 3, mRNA
85546	CAGAAAGGAAAGATGGGTTTT	21	2	NM_001177875	-	2366	2386	1	21	19	4A10G5	2	proprotein convertase subtilisin/kexin type 1 (PCSK1), transcript variant 2, mRNA
85546	CAGAAAGGAAAGATGGGTTTT	21	2	NM_000439	-	2708	2728	1	21	19	4A10G5	2	proprotein convertase subtilisin/kexin type 1 (PCSK1), transcript variant 1, mRNA
85867	ACCATCTCTCATTTCAAAATT	21	2	NM_001195215	-	4909	4929	1	21	19	5CT14	2	DENN/MADD domain containing 1B (DENND1B), transcript variant 3, mRNA
85867	ACCATCTCTCATTTCAAAATT	21	2	NM_001527	-	963	983	1	21	19	13TC6	2	histone deacetylase 2 (HDAC2), transcript variant 1, mRNA
85867	ACCATCTCTCATTTCAAAATT	21	2	NR_033441	-	991	1011	1	21	19	13TC6	2	histone deacetylase 2 (HDAC2), transcript variant 2, non-coding RNA
86020	CCCTCTCATCCTCAATGTCACA	22	2	NM_002867	-	622	643	1	22	20	7A5A8	2	RAB3B, member RAS oncogene family (RAB3B), mRNA
86239	CAAAGTTGGCTTTGCATTTTC	21	2	NM_002737	+	8166	8185	2	21	19	4T15	2	protein kinase C, alpha (PRKCA), mRNA
86492	CTTTCCAGTTAAGAAATTGTC	21	2	NR_038397	-	2901	2919	2	20	19	19	2	DNM3 opposite strand/antisense RNA (non-protein coding) (DNM3OS), non-coding RNA
87600	TGGTTCCCTTGCTATGCTTTT	21	2	NM_007121	-	127	146	2	21	19	12A7	2	nuclear receptor subfamily 1, group H, member 2 (NR1H2), mRNA
87834	TTTTCAAGATACTAAGTAAAT	21	2	NR_026957	+	1108	1128	1	21	19	6A9T4	2	uncharacterized LOC284688 (LOC284688), non-coding RNA
89474	TGAAATGGCATTGCTGTTTTG	21	2	NM_024577	+	2981	2999	1	19	19	19	2	SH3 domain and tetratricopeptide repeats 2 (SH3TC2), mRNA
89506	AATTATGATCTGGCAATTAAA	21	2	NM_198150	+	3268	3288	1	21	19	9C2G8	2	arylsulfatase family, member K (ARSK), mRNA
90168	CAGTCACAACTCAAGGAAAGAA	22	2	NM_003895	+	2197	2218	1	22	20	9C4G7	2	synaptojanin 1 (SYNJ1), transcript variant 1, mRNA
90168	CAGTCACAACTCAAGGAAAGAA	22	2	NM_203446	+	2197	2218	1	22	20	9C4G7	2	synaptojanin 1 (SYNJ1), transcript variant 2, mRNA
90168	CAGTCACAACTCAAGGAAAGAA	22	2	NM_001160302	+	2205	2226	1	22	20	9C4G7	2	synaptojanin 1 (SYNJ1), transcript variant 3, mRNA
90168	CAGTCACAACTCAAGGAAAGAA	22	2	NM_001160306	+	2190	2211	1	22	20	9C4G7	2	synaptojanin 1 (SYNJ1), transcript variant 4, mRNA
91108	CATTTCGATACAATTGGCTCT	21	2	NM_022068	+	245	265	1	21	19	4T9T6	2	piezo-type mechanosensitive ion channel component 2 (PIEZO2), mRNA
[truncated: 2,200 more rows]

## Sheet: Table S4
sRNA ID	sRNA seq	len	sRNA abundance	human mRNA ID	Map strand	human start	end	sRNA start	end	matched nt in aligned region	map pattern	# Mismatches	human gene annot
[truncated: 3,926 more rows]

[truncated: 4 more sheets: Table S5, Table S6, Table S7, Table S8]
